# Supplementary material for: Heterotrimetallic sandwich complexes supported by sulfonamido ligands
Source: Royal Society of Chemistry journal article supplement (doi:10.1039/c5qi00233h), 2015-12-09
Supplement: c5qi00233h1.pdf [file c5qi00233h1.pdf]

## **Heterotrimetallic Sandwich Complexes Supported by Sulfonamido Ligands**

Christian M. Wallen, Marika Wielizcko, John Bacsá and Christopher C.  
Scarborough\*

**Supplementary Information**

## Table of Contents

|                                     |             |
|-------------------------------------|-------------|
| <b>Materials and Methods</b>        | <b>S3</b>   |
| <b>Synthesis</b>                    | <b>S3</b>   |
| <b>Electrochemistry</b>             | <b>S8</b>   |
| <b>NMR Spectra</b>                  | <b>S8</b>   |
| <b>Water Titration</b>              | <b>S10</b>  |
| <b>Crystallographic Information</b> | <b>S12</b>  |
| <b>References</b>                   | <b>S120</b> |

## Materials and Methods

Elemental analyses were performed by Atlantic Microlabs in Norcross, GA. IR spectra were obtained using a Nicolet 380 FT-IR with Smart Orbit Diamond ATR attachment. All room temperature  $^1\text{H-NMR}$  and  $^{13}\text{C-NMR}$  spectra were obtained on a 400MHz or 500MHz instrument and referenced to residual solvent. Mass spectrometric analysis was collected by Emory University Mass Spectrometry Center using electrospray ionization on a Thermo Finnigan LTQ-FTMS instrument. Magnetic susceptibility was measured with Evan's method on a 500MHz NMR spectrometer. X-ray crystallographic data was collected and analyzed by the Emory University Department of Chemistry X-Ray Crystallography Center. All reactions sensitive to air and/or moisture were carried out in an MBraun UNIlab glovebox under a nitrogen atmosphere. Solvents for use in the glovebox were degassed by evacuation and purging with nitrogen and dried using  $3\text{\AA}$  molecular sieves. Reagents were purchased from Sigma-Aldrich, Fisher Scientific, Acros Organics, Oakwood Chemicals, or Strem Chemicals and used without further purification.  $\text{H}_3\text{Ts}_3\text{tren}^1$  and  $15\text{-crown-5}\cdot\text{Mg}(\text{OTf})_2^2$  were synthesized using previously published methods. *tert*-butyl *tert*-butanethiosulfinate was synthesized according literature procedure<sup>3</sup> with the following change: after drying the solution of thiosulfinate in dichloromethane with sodium sulfate, the solvent was removed under vacuum. This thiosulfinate was then used to make *tert*-butylsulfinyl chloride according to another published procedure<sup>4</sup>.

## Synthesis

### **Bus<sub>3</sub>H<sub>3</sub>tren:**

An oven-dried 250 mL flask was charged with a dry stir bar, cooled under vacuum, and filled with 100 mL of anhydrous dichloromethane under nitrogen. To this flask, *tert*-butyl sulfinyl chloride (33.7g, 240mmol) was added via cannula at  $-78^\circ\text{C}$ . Tris(2-aminoethyl)amine ( $\text{H}_6\text{tren}$ ) (11.6 mL, 77mmol) and triethylamine (35.6 mL, 255mmol) were mixed in anhydrous dichloromethane (40 mL) in a separate dry flask under nitrogen and added to the reaction vessel via cannula. After addition, the flask was stirred overnight under nitrogen and allowed to slowly warm to room temperature. The organic mixture was then washed with saturated aqueous sodium bicarbonate solution (3×200 mL), brine (200 mL), and dried over magnesium sulfate. The drying agent was filtered away and the filtrate concentrated via rotary evaporation. Pentane was added to precipitate the sulfinamide product. Yield: 34%. The proton NMR spectrum of this product indicates asymmetry consistent with the presence of three chiral sulfur centers in the same molecule, where the relative stereochemistry at each sulfur is random. Mass spectrometry of the precipitated product indicated the correct mass (ESMS: Exact mass calcd for  $\text{C}_{18}\text{H}_{43}\text{N}_4\text{O}_3\text{S}_3^+ [\text{M} + \text{H}]$ , 459.24918. Found: 459.24877 ( $\Delta = 0.9$  ppm)) and this product was used in the next step without further purification. The crude mixture can be recrystallized with dichloromethane and pentane to afford a crystalline isomer(s) with a complex but well-defined splitting pattern (see page S8). The trisulfinamide product (4.9g, 10.6mmol) was stirred in 40 mL dichloromethane at  $0^\circ\text{C}$  open to the air. To this stirred solution, 3-chloroperbenzoic acid (*m*-CPBA, 10.7g, 77% mixture, 48mmol active oxidant) was added carefully to control bubbling. The reaction was stirred for 5 minutes and was quenched with 40% aqueous sodium bisulfite solution and stirred for another 5 minutes. This mixture was extracted with dichloromethane and the organic layer was washed with aqueous sodium bicarbonate (2×100 mL), brine (100 mL), and dried over magnesium sulfate. The drying agent was filtered away and the filtrate

concentrated to dryness under rotary evaporation. Drying further under vacuum yielded an off-white solid. Yield: 4.0g, 75%. IR (FT-ATR)  $\tilde{\nu}/\text{cm}^{-1}$ : 3262 ( $\nu_{\text{NH}}$ ), 2944, 2811, 1455, 1431, 1398, 1367, 1292, 1207, 1110, 1078, 1050, 1028, 950, 927, 894, 825, 814, 793, 732, 662, 565.  $\delta\text{H}$ (500 MHz;  $\text{CDCl}_3$ ) 1.39 (27 H, s, tBu), 2.59 (6 H, t,  $\text{NCH}_2$ ), 3.27 (6 H, s,  $\text{BusNCH}_2$ ) and 5.7 (3 H, t, NH).  $\delta\text{C}$ (125 MHz;  $\text{CDCl}_3$ ) 24.2, 42.0, 55.0, 60.0. ESMS: Exact mass calcd for  $\text{C}_{18}\text{H}_{43}\text{N}_4\text{O}_6\text{S}_3^+$  [M + H], 507.23392. Found: 507.23400 ( $\Delta = 0.2$  ppm).

### **Sr(OTf)<sub>2</sub>•H<sub>2</sub>O**

According to a literature procedure<sup>5</sup>, triflic acid (10 mL, 113mmol) was diluted in 125 mL of water and added slowly to a vigorously stirred solution of  $\text{SrCO}_3$  (9.2g, 62.2mmol) in water at 0°C. After addition, the solution was allowed to slowly warm to room temperature. The solution was filtered to remove any unreacted carbonate and the water was removed under reduced pressure. Drying under vacuum at 100°C afforded monohydrate product. Yield: 18.8g, 79%. Anal. Calcd for  $\text{C}_2\text{H}_2\text{F}_6\text{O}_7\text{S}_2\text{Sr}$ : C, 5.95; H, 0.5; F, 28.2%. Found: C, 6.0; H, 0.4; F, 28.0.

### **[<sup>n</sup>Bu<sub>4</sub>N][1-OH<sub>2</sub>]**

In a two-neck flask,  $\text{Ts}_3\text{H}_3\text{tren}$  (8.56g, 14.1mmol) and  $\text{CoCl}_2$  (1.83g, 14.1mmol) were stirred in 40 mL DMA under nitrogen. KH (1.75g, 43.6mmol) was added in portions carefully, which causes the solution to change from blue to purple. After stirring overnight,  $\text{Bu}_4\text{NBr}$  (4.53g, 14.1mmol) was added with a few drops of methanol to quench any residual hydride base. The reaction mixture was diluted with  $\text{CH}_2\text{Cl}_2$  (200 mL) and washed with water (3×200 mL) and brine (200 mL). The organic layer was dried with  $\text{Na}_2\text{SO}_4$ , filtered and concentrated under rotary evaporation. Addition of diethyl ether afforded purple crystals. Yield: 9.99g, 77%. Vapor diffusion of ether into a  $\text{CH}_2\text{Cl}_2$  solution of the product afforded X-ray quality purple crystals (see note on S9) Anal. Calcd for  $\text{C}_{43}\text{H}_{71}\text{CoN}_5\text{O}_7\text{S}_3$ : C, 55.8; H, 7.7; N, 7.6%. Found: C, 55.9; H, 7.7; N, 7.5.  $\lambda_{\text{max}}(\text{TFE})/\text{nm}$  222 ( $\epsilon/\text{dm}^3 \text{ mol}^{-1} \text{ cm}^{-1}$  7 220), 528 (44) and 1571 (36). IR (FT-ATR)  $\tilde{\nu}/\text{cm}^{-1}$ : 3293 ( $\nu_{\text{OH}}$ ), 3058, 2959, 2894, 2854, 1586, 1483, 1465, 1442, 1367, 1350, 1290, 1275, 1240, 1129, 1105, 1080, 1042, 1019, 970, 932, 871, 813, 753, 727, 709, 692, 663, 598, 569, 548, 530. ESMS: Exact mass calcd for  $\text{C}_{27}\text{H}_{33}\text{CoN}_4\text{O}_6\text{S}_3^-$  [ $\text{ML}^-$ ], 664.08997. Found: 664.08929 ( $\Delta = 1.0$  ppm). Magnetic susceptibility (Evan's method,  $\text{CDCl}_3$ ):  $\mu_{\text{obs}} = 3.46 \mu_{\text{B}}$ .

### **[<sup>n</sup>Bu<sub>4</sub>N][1-OH<sub>2</sub>] dehydration to form [<sup>n</sup>Bu<sub>4</sub>N][1]**

In a glovebox, [<sup>n</sup>Bu<sub>4</sub>N][1-OH<sub>2</sub>] was dissolved in dichloromethane with 3Å molecular sieves. After sitting overnight the solution was filtered through celite and layered under ether. Blue crystals were formed which were suitable for analysis by X-ray crystallography.  $\lambda_{\text{max}}(\text{CH}_2\text{Cl}_2)/\text{nm}$  248sh ( $\epsilon/\text{dm}^3 \text{ mol}^{-1} \text{ cm}^{-1}$  14 100), 270sh (11 800), 408 (17), 567 (51), 746 (7) and 1483 (59). Magnetic susceptibility (Evan's method,  $\text{CDCl}_3$ ):  $\mu_{\text{obs}} = 4.29 \mu_{\text{B}}$ .

### **Ca1<sub>2</sub>**

Under nitrogen, [<sup>n</sup>Bu<sub>4</sub>N][1-OH<sub>2</sub>] (2.05g, 2.2mmol) was dissolved in 10 mL glyme with a few drops of methanol and dried overnight with 3Å molecular sieves. This solution was filtered into a vial and  $\text{Ca}(\text{OTf})_2$  (488mg, 1.4mmol) in methanol was added. The tightly-capped vial was heated to 85°C, while periodically releasing pressure manually as blue crystals formed and the supernatant lightened. When most of the color of the solution had bleached, the supernatant was decanted and the crystals washed with glyme and ether. The crystals were then dried under vacuum. A few crystals taken from the mixture

after washing with ether and before drying were found suitable for analysis by X-ray crystallography. Yield: 1.06g, 70%. Anal. Calcd for  $C_{54}H_{66}CaCo_2N_8O_{12}S_6$ : C, 47.4; H, 4.9; N, 8.2%. Found: C, 47.5; H, 4.75; N, 8.05.  $\lambda_{\max}(\text{TFE})/\text{nm}$  222 ( $\epsilon/\text{dm}^3 \text{ mol}^{-1} \text{ cm}^{-1}$  58 800), 406 (25), 561 (89), 700 (26) and 1439 (94). IR (FT-ATR)  $\tilde{\nu}/\text{cm}^{-1}$ : 2903, 2858, 1560, 1496, 1446, 1400, 1342, 1253, 1116, 1081, 1035, 972, 916, 868, 810, 735, 708, 664, 606, 549. ESMS: Exact mass calcd for  $C_{27}H_{35}CaCoN_4O_7S_3^+$  [ $ML^- + H_2O + Ca^{2+}$ ], 722.06203. Found: 722.06202 ( $\Delta = 0.01$  ppm). Exact mass calcd for  $C_{27}H_{37}CaCoN_4O_8S_3^+$  [ $ML^- + 2H_2O + Ca^{2+}$ ], 740.07259. Found: 740.07259 ( $\Delta = 0.0$  ppm). Magnetic susceptibility (Evan's method, TFE- $d_3$ ):  $\mu_{\text{obs}} = 5.82 \mu_B$ .

### **Sr1<sub>2</sub>•(OH<sub>2</sub>)<sub>1.5</sub>**

[<sup>0</sup>Bu<sub>4</sub>N][**1-OH<sub>2</sub>**] (85mg, 0.092mmol) and Sr(OTf)•H<sub>2</sub>O (18mg, 0.046mmol) were mixed in 2 mL of acetone and evaporated to dryness. The pink residue was dissolved in 2 mL of acetonitrile with minimal methanol and heated to 80°C overnight. The purple crystals were washed with dichloromethane, acetonitrile, and ether and dried under vacuum to yield purple crystalline product. Yield: 15mg, 23%. Anal. Calcd for  $C_{54}H_{69}Co_2N_8O_{13.5}S_6Sr$ : C, 44.92; H, 4.82; N, 7.76. Found: C, 44.54; H, 4.76; N, 7.74.  $\lambda_{\max}(\text{TFE})/\text{nm}$  222 ( $\epsilon/\text{dm}^3 \text{ mol}^{-1} \text{ cm}^{-1}$  52 900), 411 (26), 561 (91), 690 (20) and 1421 (107). IR (FT-ATR)  $\tilde{\nu}/\text{cm}^{-1}$ : 2911, 2856, 1600, 1496, 1446, 1398, 1246, 1126, 1079, 1040, 1020, 979, 928, 873, 811, 734, 708, 663, 601, 580, 549. ESMS: Exact mass calcd for  $C_{27}H_{33}CoN_4O_6S_3^-$  [ $ML^-$ ], 664.08997. Found: 664.08670 ( $\Delta = 4.9$  ppm).

### **Ba1<sub>2</sub>•3H<sub>2</sub>O**

[<sup>0</sup>Bu<sub>4</sub>N][**1-OH<sub>2</sub>**] (493mg, 0.53mmol) and Ba(OTf)<sub>2</sub> (116mg, 0.27mmol) were dissolved separately in acetone. The barium-containing solution was added to the cobalt solution and solution left open to air. A pink powder precipitated from solution, which was collected by filtration, washed with cold acetone and ether, and dried on the filter to afford pink BaCoTs•(H<sub>2</sub>O)<sub>3</sub> (235mg, 58%). Anal. Calcd for  $C_{54}H_{66}BaCo_2N_8O_{12}S_6$ : C, 42.65; H, 4.77; N, 7.37. Found: C, 42.36; H, 4.69; N, 7.24.  $\lambda_{\max}(\text{TFE})/\text{nm}$  222 ( $\epsilon/\text{dm}^3 \text{ mol}^{-1} \text{ cm}^{-1}$  56 400), 404 (29), 563 (103), 694 (18) and 1391 (103). IR (FT-ATR)  $\tilde{\nu}/\text{cm}^{-1}$ : 3514 ( $\nu_{\text{OH}}$ ), 2954, 2904, 2856, 1599, 1495, 1447, 1399, 1352, 1246, 1220, 1207, 1139, 1115, 1073, 1038, 970, 933, 879, 812, 742, 708, 661, 600. ESMS: Exact mass calcd for  $C_{18}H_{39}CoN_4O_6S_3^-$  [ $ML^-$ ], 664.08997 ( $\Delta =$  ). Found: 664.08997 ( $\Delta = 0.0$  ppm). Magnetic susceptibility (Evan's method, TFE- $d_3$ ):  $\mu_{\text{obs}} = 6.03 \mu_B$ .

### **Dehydration of Ba1<sub>2</sub>•3H<sub>2</sub>O and crystallization of Ba1<sub>2</sub> dimer**

In a glovebox, **BaCoTs•3H<sub>2</sub>O** was dissolved in dichloromethane containing 3Å molecular sieves. After sitting overnight the solution was filtered through celite and layered under ether, forming blue X-ray quality crystals.

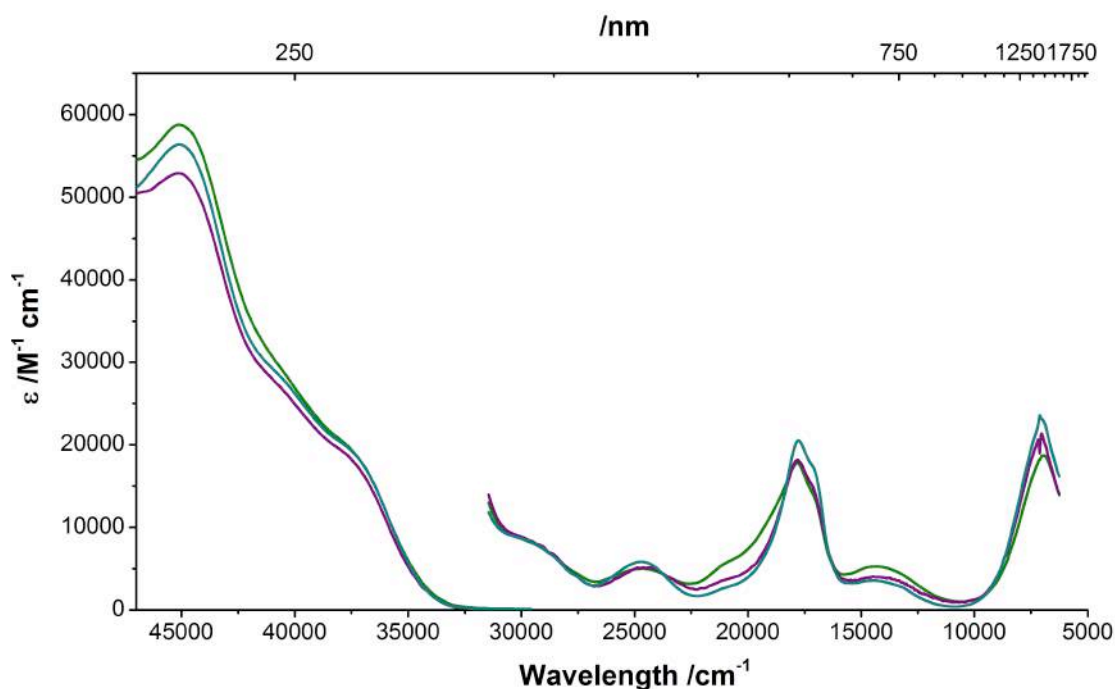

**Figure S1.** Absorption spectra of  $\text{Ca}_{12}$  (—),  $\text{Sr}_{12}\cdot(\text{OH}_2)_{1.5}$  (—), and  $\text{Ba}_{12}\cdot(\text{OH}_2)_3$  (—) in trifluoroethanol.

### $[\text{Bu}_4\text{N}][2\text{-OH}_2]$

In a schlenk flask,  $\text{Bu}_3\text{H}_3\text{tren}$  (5.27g, 10.4mmol) and  $\text{CoCl}_2$  (1.35g, 10.4mmol) were stirred in 40 mL DMA under nitrogen. KH (1.29g, 32.2mmol) was added in portions carefully to keep bubbling to a minimum, and the solution turned from blue to turquoise. After stirring overnight, the solution had turned purple, and  $[\text{Bu}_4\text{N}][\text{Br}]$  (3.36g, 10.4mmol) was added with a few drops of methanol to quench any residual hydride base. The reaction mixture was diluted with  $\text{CH}_2\text{Cl}_2$  (200 mL), and washed with water (3×200 mL) and brine (200 mL). The organic layer was dried with  $\text{Na}_2\text{SO}_4$ , filtered and concentrated under rotary evaporation. Addition of diethyl ether afforded purple flaky product. Yield: 4.0g, 47%. Vapor diffusion of ether into a  $\text{CH}_2\text{Cl}_2$  solution of the product afforded flaky purple crystals suitable for X-ray diffraction analysis. Anal. Calcd for  $\text{C}_{34}\text{H}_{77}\text{CoN}_5\text{O}_7\text{S}_3$ : C, 49.6; H, 9.4; N, 8.5%. Found: C, 49.9; H, 8.3; N, 8.3.  $\lambda_{\text{max}}(\text{TFE})/\text{nm}$  260 ( $\epsilon/\text{dm}^3 \text{ mol}^{-1} \text{ cm}^{-1}$  3071), 527 (47) and 1587 (31). IR (FT-ATR)  $\tilde{\nu}/\text{cm}^{-1}$ : 3332 ( $\nu_{\text{OH}}$ ), 2960, 2874, 1479, 1455, 1386, 1358, 1277, 1229, 1161, 1121, 1105, 1079, 1063, 1038, 971, 959, 922, 887, 858, 813, 799, 737, 667, 590, 542. ESMS: Exact mass calcd for  $\text{C}_{18}\text{H}_{39}\text{CoN}_4\text{O}_6\text{S}_3^-$  [ML], 562.13692. Found: 562.13708 ( $\Delta = 0.3$  ppm). Exact mass calcd for  $\text{C}_{52}\text{H}_{114}\text{Co}_2\text{N}_9\text{O}_{12}\text{S}_6^-$  [2ML +  $\text{Bu}_4\text{N}^+$ ], 1366.55807. Found: 1366.55703 ( $\Delta = 0.8$  ppm). Exact mass calcd for  $\text{C}_{18}\text{H}_{39}\text{CoN}_4\text{O}_6\text{S}_3^-$  [ML +  $\text{Bu}_4\text{N}^+$  +  $\text{H}_2\text{O} - \text{e}^-$ ], 822.43116. Found: 822.43413 ( $\Delta = 3.6$  ppm). Exact mass calcd for  $\text{C}_{50}\text{H}_{111}\text{CoN}_6\text{O}_6\text{S}_3^+$  [ML + 2 $\text{Bu}_4\text{N}^+$ ], 1046.70537. Found: 1046.70848 ( $\Delta = 3.0$  ppm). Magnetic susceptibility (Evan's method,  $\text{CDCl}_3$ ):  $\mu_{\text{obs}} = 4.12 \mu_{\text{B}}$ .

### $[\text{Bu}_4\text{N}][2\text{-OH}_2]$ dehydration to form $[\text{Bu}_4\text{N}][2]$

In a glovebox,  $[\text{Bu}_4\text{N}][2\text{-OH}_2]$  was dissolved in dichloromethane with 3Å molecular sieves. After sitting

overnight the solution was filtered through celite and layered under ether. Blue crystals were formed which were suitable for X-ray diffraction analysis.  $\lambda_{\max}(\text{CH}_2\text{Cl}_2)/\text{nm}$  267 ( $\epsilon/\text{dm}^3 \text{ mol}^{-1} \text{ cm}^{-1}$  6 030), 414 (15), 571 (37), 741 (7) and 1543 (52). Magnetic susceptibility (Evan's method,  $\text{CDCl}_3$ ):  $\mu_{\text{obs}} = 4.40 \mu_{\text{B}}$ .

### **Mg<sub>2</sub>**

$[\text{Bu}_4\text{N}][\mathbf{2-OH}_2]$  (72mg, 0.088mmol) and 15-crown-5  $\text{Mg}(\text{OTf})_2$  adduct (24mg, 0.044mmol) were stirred in acetonitrile at 65°C. Crystals slowly formed as the solution lightened in color. When the solution stopped lightening, the supernatant was decanted from the crystals and the crystals were washed with dichloromethane and dried under vacuum to yield blue crystalline product. Although these crystals were found to be insoluble in traditional organic solvents, some of the crystals were found to be suitable for X-ray diffraction analysis. Yield: 33mg, 65%. IR (FT-ATR)  $\bar{\nu}/\text{cm}^{-1}$ : 2909, 2865, 1478, 1461, 1393, 1365, 1333, 1274, 1244, 1224, 1141, 1080, 1032, 964, 913, 857, 816, 805, 726, 669, 614, 559, 542.

### **Ca<sub>2</sub>**

$[\text{Bu}_4\text{N}][\mathbf{2-OH}_2]$  (478mg, 0.58mmol) was dissolved in 120 mL methanol at 60°C, and  $\text{Ca}(\text{OTf})_2$  (98mg, 0.29mmol) was dissolved separately in 5 mL methanol at 60°C. The calcium solution was added dropwise into the cobalt solution without stirring. The reaction solution was maintained at 60°C, promoting formation of crystals concomitant bleaching of the supernatant. When the solution stopped losing color, the supernatant was decanted and the remaining blue crystals were washed with ether and dried under vacuum. Before drying, some blue crystals were examined by X-ray crystallography. If the methanol solution was too concentrated or too cool, a blue powder came out of solution. This powder has the same composition as the crystalline samples as shown by elemental analysis. Yield: 280mg, 83%. Anal. Calcd for  $\text{C}_{36}\text{H}_{78}\text{CaCo}_2\text{N}_8\text{O}_{12}\text{S}_6$ : C, 47.4; H, 4.9; N, 8.2%. Found: C, 47.5; H, 4.75; N, 8.05.  $\lambda_{\max}(\text{TFE})/\text{nm}$  240 ( $\epsilon/\text{dm}^3 \text{ mol}^{-1} \text{ cm}^{-1}$  6 560), 260 (11 200), 401 (38), 560 (129) and 1405 (136). IR (FT-ATR)  $\bar{\nu}/\text{cm}^{-1}$ : 2906, 2864, 1479, 1393, 1363, 1335, 1272, 1244, 1227, 1133, 1075, 1032, 966, 914, 860, 815, 727, 673, 611, 561. ESMS: Exact mass calcd for  $\text{C}_{18}\text{H}_{41}\text{CaCoN}_4\text{O}_7\text{S}_3^+$  [ $\text{ML}^- + \text{H}_2\text{O} + \text{Ca}^{2+}$ ], 620.10898. Found: 620.10939 ( $\Delta = 0.7$  ppm). Magnetic susceptibility (Evan's method, TFE- $d_3$ ):  $\mu_{\text{obs}} = 6.18 \mu_{\text{B}}$ .

### **Sr<sub>2</sub>**

$[\text{Bu}_4\text{N}][\mathbf{2-OH}_2]$  (119mg, 0.15mmol) and  $\text{Sr}(\text{OTf})_2 \cdot \text{H}_2\text{O}$  (29mg, 0.07mmol) were dissolved separately in acetone, and these solutions were mixed. A blue powder formed, which was allowed to settle. This blue powder was triturated with methanol and ether, and then dried under vacuum. Vapor diffusion of ether into a solution of this solid in dichloromethane and methanol afforded X-ray quality crystals. Yield: 81mg, 92%. Anal. Calcd for  $\text{C}_{36}\text{H}_{78}\text{Co}_2\text{N}_8\text{O}_{12}\text{S}_6\text{Sr}$ : C, 35.65; H, 6.48; N, 9.24. Found: C, 35.65; H, 6.43; N, 9.12.  $\lambda_{\max}(\text{TFE})/\text{nm}$  240sh ( $\epsilon/\text{dm}^3 \text{ mol}^{-1} \text{ cm}^{-1}$  5 550), 262 (9 760), 401 (49), 565 (138) and 1405 (122). IR (FT-ATR)  $\bar{\nu}/\text{cm}^{-1}$ : 2966, 2901, 2864, 1470, 1455, 1392, 1363, 1335, 1272, 1229, 1129, 1072, 1033, 965, 918, 861, 815, 739, 728, 675, 666, 607, 594, 563. ESMS: Exact mass calcd for  $\text{C}_{18}\text{H}_{39}\text{CoN}_4\text{O}_6\text{S}_3\text{Sr}^+$  [ $\text{ML}^- + \text{Sr}^{2+}$ ], 650.04144. Found: 650.04186 ( $\Delta = 0.6$  ppm). Exact mass calcd for  $\text{C}_{18}\text{H}_{41}\text{CoN}_4\text{O}_7\text{S}_3\text{Sr}^+$  [ $\text{ML}^- + \text{H}_2\text{O} + \text{Sr}^{2+}$ ], 668.05200. Found: 668.05233 ( $\Delta = 0.5$  ppm). Magnetic susceptibility (Evan's method, TFE- $d_3$ ):  $\mu_{\text{obs}} = 6.12 \mu_{\text{B}}$ .

### **Ba<sub>2</sub>**

$[\text{Bu}_4\text{N}][\mathbf{2-OH}_2]$  (97.0mg, 0.12mmol) and  $\text{Ba}(\text{OTf})_2$  (25.7mg, 0.06mmol) were dissolved in acetone and

heated to 65°C until supernatant stopped lightening and blue crystals stopped forming. The supernatant was decanted away, and the crystals were washed with ether and dried under vacuum to yield blue crystalline product. Vapor diffusion of ether into a solution of **Ba2<sub>2</sub>** in dichloromethane and methanol yielded crystals suitable for X-ray crystallography. Yield: 57.0 mg, 75%. Anal. calcd for C<sub>108</sub>H<sub>138</sub>Co<sub>4</sub>N<sub>16</sub>O<sub>27</sub>S<sub>12</sub>Sr<sub>2</sub>: C, 44.92; H, 4.82; N, 7.76. Found: C, 44.54; H, 4.76; N, 7.74.  $\lambda_{\max}(\text{TFE})/\text{nm}$  241 ( $\epsilon/\text{dm}^3 \text{ mol}^{-1} \text{ cm}^{-1}$  5 220), 263 (8 930), 406 (36), 567 (109) and 1446 (102). IR (FT-ATR)  $\tilde{\nu}/\text{cm}^{-1}$ : 2967, 2900, 2859, 1471, 1393, 1363, 1233, 1123, 1070, 1040, 966, 924, 862, 814, 739, 665, 593, 563. ESMS: Exact mass calcd for C<sub>18</sub>H<sub>39</sub>CoN<sub>4</sub>O<sub>6</sub>S<sub>3</sub><sup>-</sup> [ML<sup>-</sup>], 562.13692. Found: 562.13584 ( $\Delta = 1.9 \text{ ppm}$ ). Magnetic susceptibility (Evan's method, TFE-d<sub>3</sub>):  $\mu_{\text{obs}} = 6.10 \mu_{\text{B}}$ .

## Electrochemistry

Cyclic voltammetric experiments were conducted in trifluoroethanol (TFE) or dichloromethane with 0.1M tetrabutylammonium hexafluorophosphate as supporting electrolyte and a glassy carbon working electrode. The reference electrode solution was made with Ag(PF<sub>6</sub>) in TFE or Ag(NO<sub>3</sub>) in acetonitrile for the dichloromethane solutions. For [<sup>n</sup>Bu<sub>4</sub>N][**1**] and [<sup>n</sup>Bu<sub>4</sub>N][**2**], the experiments were performed inside a glovebox using anhydrous dichloromethane. The potential window was scanned at 0.1 V/s.

## NMR Spectra

Trisulfonamide crystals, <sup>1</sup>H  
400MHz, CDCl<sub>3</sub>

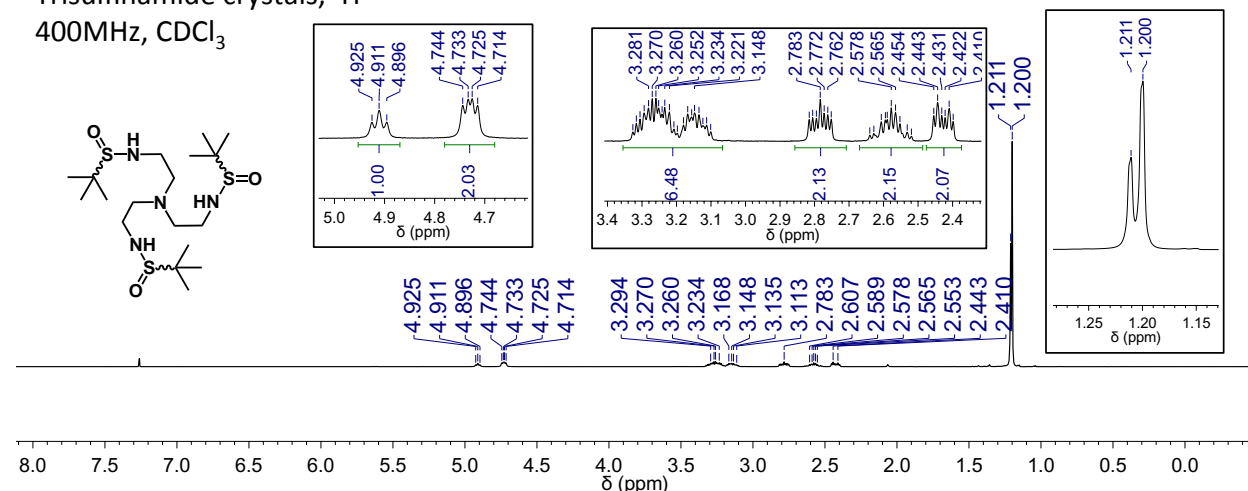



H<sub>3</sub>Bus<sub>3</sub>tren, <sup>1</sup>H  
500MHz, CDCl<sub>3</sub>

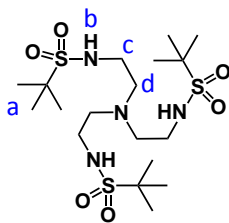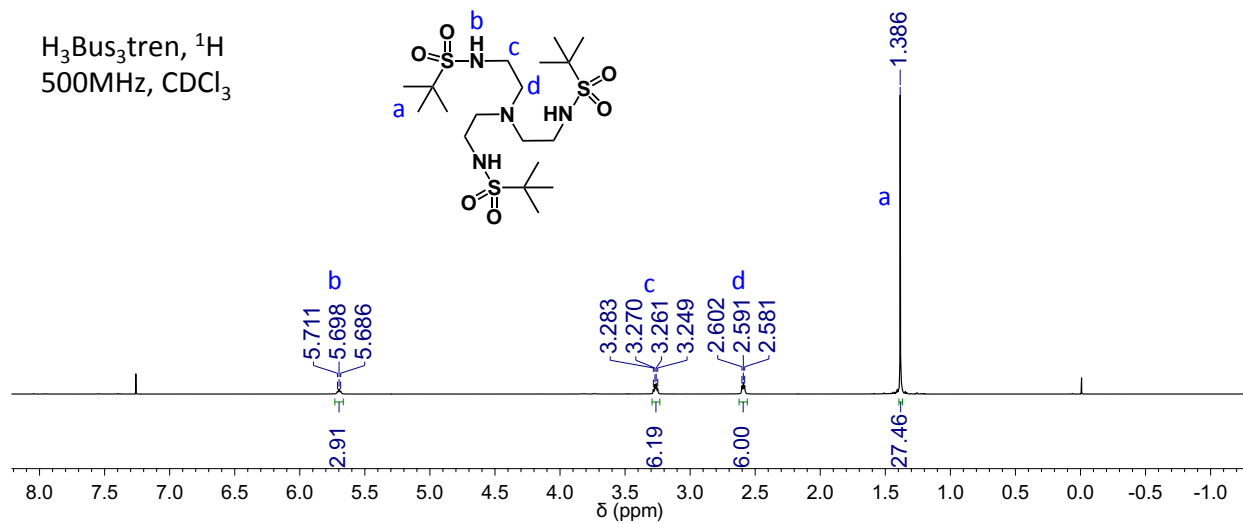

H<sub>3</sub>Bus<sub>3</sub>tren, <sup>13</sup>C  
125MHz, CDCl<sub>3</sub>

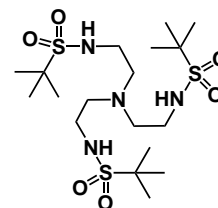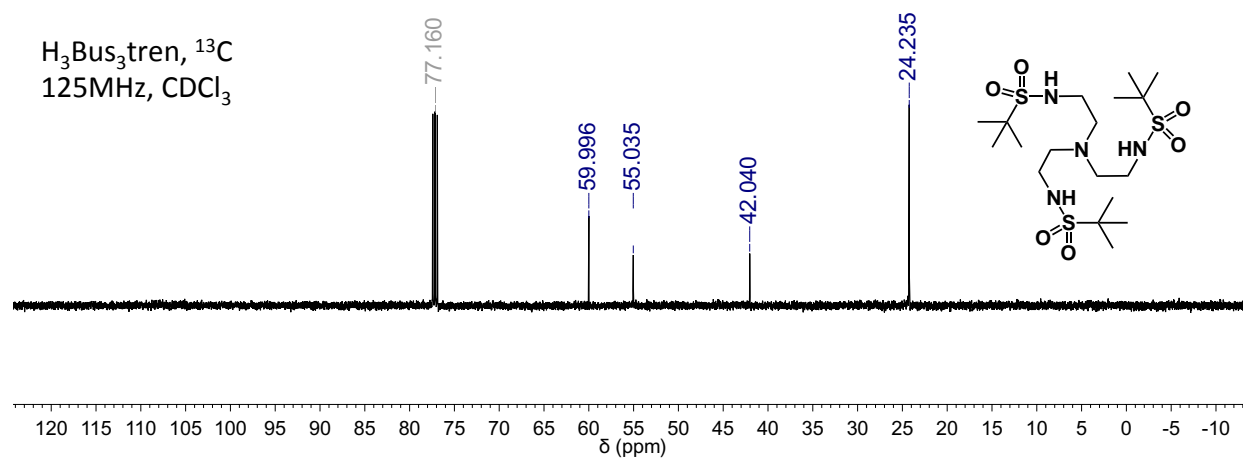

## Water Titration

Trifluoroethanol (TFE) was freshly distilled from calcium sulfate and sodium carbonate under nitrogen and degassed prior to use. Sandwich complexes were weighed out in a glovebox, dissolved in TFE and diluted to 5mL in volumetric flasks. A gas-tight syringe was used to dispense 3.5mL of each solution into a quartz cuvette fitted with a septum cap. Water was added to the cuvette in 5 $\mu$ L, 10 $\mu$ L, or 20 $\mu$ L increments from a gas-tight syringe. Each solution was scanned initially and inverted several times after each addition of water. For each complex, four wavelengths were chosen for data workup. For each wavelength, the smallest absorbance value was subtracted from the series of data points and these values were divided by the concentration of the sandwich complex in solution. These data were plotted versus equivalents of water added. The curves for **Ca2<sub>2</sub>** and **Sr2<sub>2</sub>** were fit to sigmoidal logistic functions using OriginPro 8.6. The data for **Ca1<sub>2</sub>** and **Ba2<sub>2</sub>** could not be reasonably modeled.

$$\text{Slogistic1 Function: } y = \frac{a}{1+e^{-k(x-c)}}$$

|                        | a        |                | c         |                | k        |                | Statistics      |               |
|------------------------|----------|----------------|-----------|----------------|----------|----------------|-----------------|---------------|
|                        | Value    | Standard Error | Value     | Standard Error | Value    | Standard Error | Reduced Chi-Sqr | Adj. R-Square |
| <b>Ca2<sub>2</sub></b> | 27.9487  | 0.18493        | 208.70663 | 1.30343        | -0.01927 | 3.74532E-4     | 0.08362         | 0.99931       |
| <b>Sr2<sub>2</sub></b> | 35.98668 | 0.89708        | 115.94357 | 3.7926         | -0.01887 | 8.122E-4       | 0.40771         | 0.99738       |

**Ca2<sub>2</sub>** halfway point: 209eq

**Sr2<sub>2</sub>** halfway point: 116eq

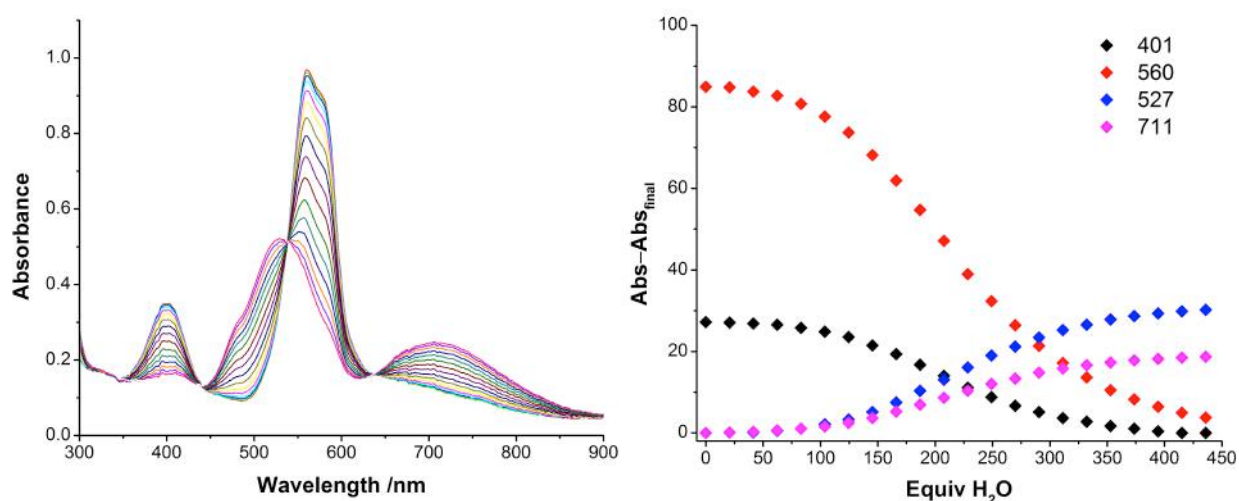

Figure S2. **Ca2<sub>2</sub>** UV-Vis traces (left) and titration curves (right)

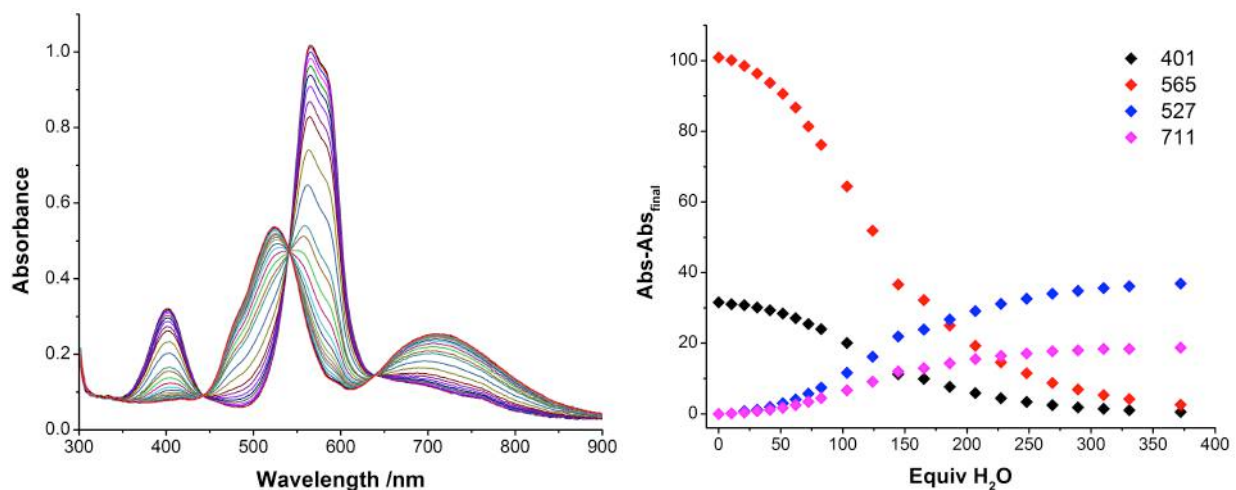

Figure S3. Sr<sub>2</sub> UV-Vis traces (left) and titration curves (right)

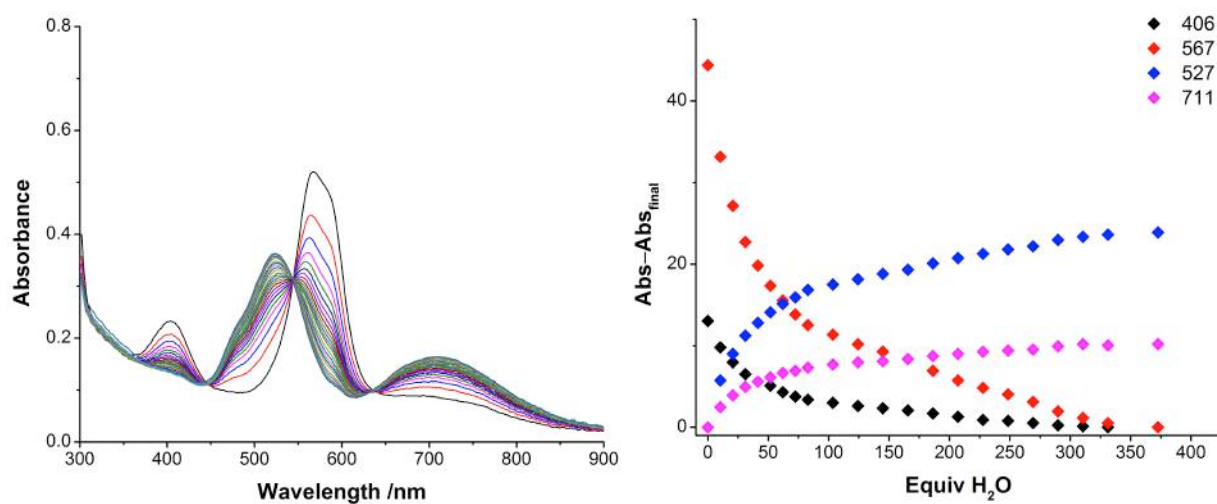

Figure S4. Ba<sub>2</sub> UV-Vis traces (left) and titration curves (right)

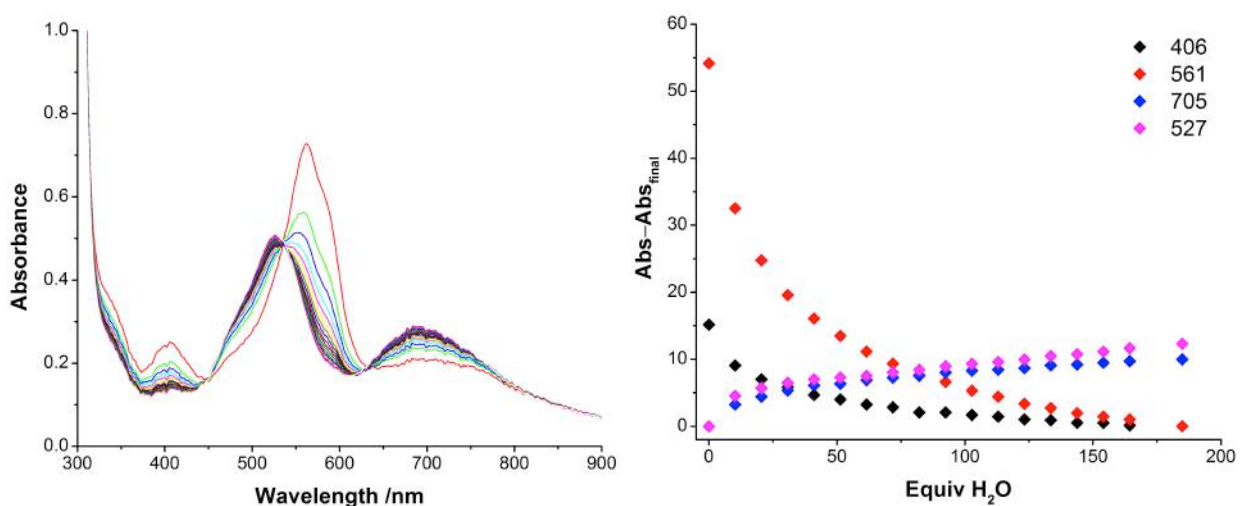

Figure S5. Ca<sub>1</sub> UV-Vis traces (left) and titration curves (right)

## Crystallographic Information

Note for  $[\text{}^n\text{Bu}_4\text{N}][\mathbf{1-OH}_2]$ : These crystals displayed an additional diffraction pattern. The crystals show strong diffraction maxima due to a small sub-cell but additional weak peaks forming distinctive groups of two reflections around each allowed peak. These extra peaks were not commensurate with the lattice vectors ruling out a supercell and were also not due to twinning. Refinement of the crystal structure on the small cell yielded a partial structure, but with some physically unreasonable results. Therefore, crystallographic data for this species are not included in this manuscript.

Submitted by: **Christian Wallen**

Emory University

Solved by: **Thomas C. Pickel**

Sample ID: **CMW04BuCoTs**

## Crystal Data and Experimental<sup>6</sup>

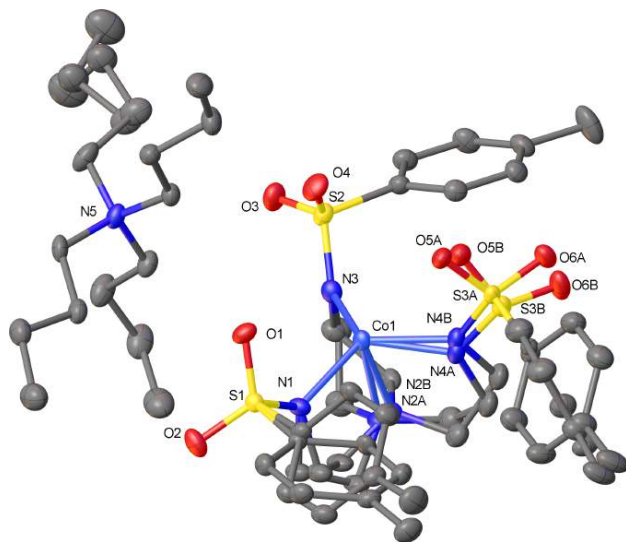

**Experimental.** Single violet prism-shaped crystals of (CMW04BuCoTs) were recrystallised from a mixture of CH<sub>2</sub>Cl<sub>2</sub> and diethyl ether by vapor diffusion. A suitable crystal (0.43×0.43×0.38) was selected and mounted on a loop with paratone oil on a Bruker APEX-II CCD diffractometer. The crystal was kept at  $T = 100(2)$  K during data collection. The structure was solved with the **XT** (Sheldrick, 2008) structure solution program, using direct and dual-space solution methods and by using **Olex2** (Dolomanov et al., 2009), as the graphical interface. The model was refined with version 2014/7 of **ShelXL-97** (Sheldrick, 2008) using Least Squares minimisation.

**Crystal Data.** C<sub>43</sub>H<sub>69</sub>CoN<sub>5</sub>O<sub>6</sub>S<sub>3</sub>,  $M_r = 907.17$ , monoclinic, P2<sub>1</sub>/n (No. 14),  $a = 14.2734(9)$  Å,  $b = 14.8425(9)$  Å,  $c = 21.9158(14)$  Å,  $\beta = 102.4610(10)^\circ$ ,  $\alpha = \gamma = 90^\circ$ ,  $V = 4533.6(5)$  Å<sup>3</sup>,  $T = 100(2)$  K,  $Z = 4$ ,  $Z' = 1$ ,  $\mu(\text{MoK}\alpha) = 0.568$ , 104077 reflections measured, 13895 unique ( $R_{int} = 0.0651$ ) which were used in all calculations. The final  $wR_2$  was 0.1875 (all data) and  $R_1$  was 0.0711 ( $I > 2(I)$ ).

| Compound                     | CMW04BuCoTs                                                                    |
|------------------------------|--------------------------------------------------------------------------------|
| Formula                      | C <sub>43</sub> H <sub>69</sub> CoN <sub>5</sub> O <sub>6</sub> S <sub>3</sub> |
| $D_{calc.}/\text{g cm}^{-3}$ | 1.329                                                                          |
| $\mu/\text{mm}^{-1}$         | 0.568                                                                          |
| Formula Weight               | 907.17                                                                         |
| Colour                       | violet                                                                         |
| Shape                        | prism                                                                          |
| Max Size/mm                  | 0.43                                                                           |
| Mid Size/mm                  | 0.43                                                                           |
| Min Size/mm                  | 0.38                                                                           |
| $T/\text{K}$                 | 100(2)                                                                         |
| Crystal System               | monoclinic                                                                     |
| Space Group                  | P2 <sub>1</sub> /n                                                             |
| $a/\text{Å}$                 | 14.2734(9)                                                                     |
| $b/\text{Å}$                 | 14.8425(9)                                                                     |
| $c/\text{Å}$                 | 21.9158(14)                                                                    |
| $\alpha/^\circ$              | 90                                                                             |
| $\beta/^\circ$               | 102.4610(10)                                                                   |
| $\gamma/^\circ$              | 90                                                                             |
| $V/\text{Å}^3$               | 4533.6(5)                                                                      |
| $Z$                          | 4                                                                              |
| $Z'$                         | 1                                                                              |
| $\Theta_{min}/^\circ$        | 1.562                                                                          |
| $\Theta_{max}/^\circ$        | 30.581                                                                         |
| Measured Refl.               | 104077                                                                         |
| Independent Refl.            | 13895                                                                          |
| Reflections Used             | 10880                                                                          |
| $R_{int}$                    | 0.0651                                                                         |
| Parameters                   | 762                                                                            |
| Restraints                   | 561                                                                            |
| Largest Peak                 | 1.980                                                                          |
| Deepest Hole                 | -1.667                                                                         |
| GooF                         | 1.041                                                                          |
| $wR_2$ (all data)            | 0.1875                                                                         |
| $wR_2$                       | 0.1701                                                                         |
| $R_1$ (all data)             | 0.0919                                                                         |
| $R_1$                        | 0.0711                                                                         |
| CCDC #                       | 1434440                                                                        |

## Structure Quality Indicators

|                     |          |      |            |      |                  |       |          |      |
|---------------------|----------|------|------------|------|------------------|-------|----------|------|
| <b>Reflections:</b> | d min    | 0.70 | $I/\sigma$ | 17.2 | R <sub>int</sub> | 6.51% | complete | 100% |
| <b>Refinement:</b>  | Max Peak | 2.0  | Min Peak   | -1.7 | Goof             | 1.041 |          |      |

A violet prism-shaped crystal with dimensions 0.43×0.43×0.38 was mounted on a loop with paratone oil. Data were collected using a Bruker APEX-II CCD diffractometer equipped with an Oxford Cryosystems low-temperature apparatus operating at  $T = 100(2)$  K.

Data were measured using  $\phi$  and  $\omega$  scans using MoK $\alpha$  radiation (fine-focus sealed tube, 45 kV, 35 mA). The total number of runs and images was based on the strategy calculation from the program **APEX2** (Bruker). The actually achieved resolution was  $\theta = 30.581$ .

Cell parameters were retrieved using the **SAINT** (Bruker, V8.34A, 2013) software and refined using **SAINT** (Bruker, V8.34A, 2013) on 9735 reflections, 9 of the observed reflections. Data reduction was performed using the **SAINT** (Bruker, V8.34A, 2013) software which corrects for Lorentz polarisation. The final completeness is 99.9% out to 30.581 in  $\theta$ . The absorption coefficient ( $\mu$ ) of this material is 0.568 mm $^{-1}$  and the minimum and maximum transmissions are 0.6511 and 0.7461.

The structure was solved with **ShelXT** (Sheldrick, 2015) in the space group P1 using combined Patterson and dual-space recycling methods. **ShelXT** (Sheldrick, 2015) determined that structure belongs to the space group P2 $_1$  (# 4). The structure was refined by Least Squares using version of **ShelXL-97** (Sheldrick, 2008). All non-hydrogen atoms were refined anisotropically. Hydrogen atom positions were calculated geometrically and refined using the riding model.

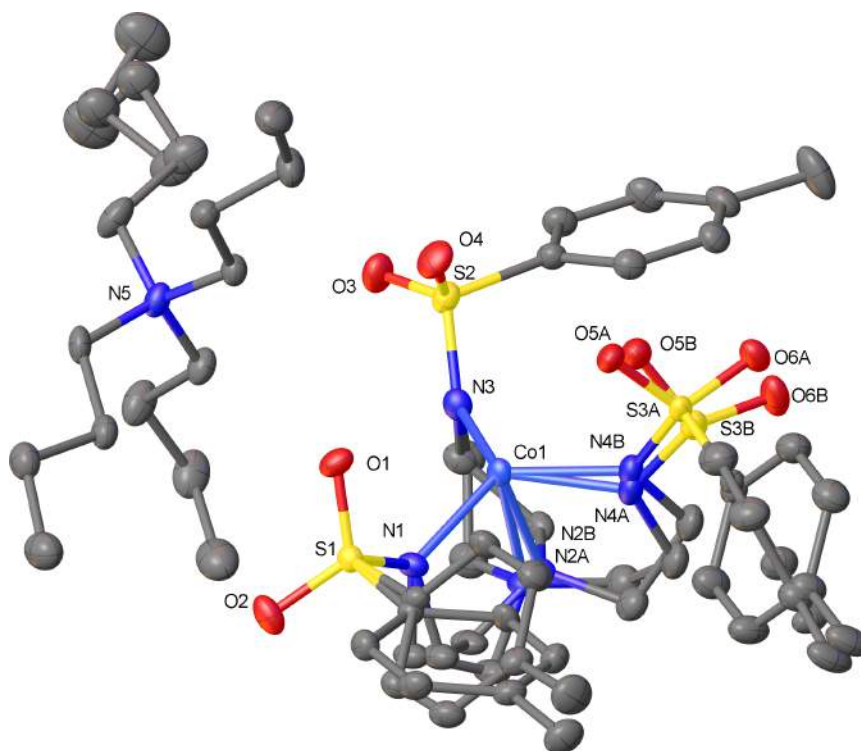

Figure S6:

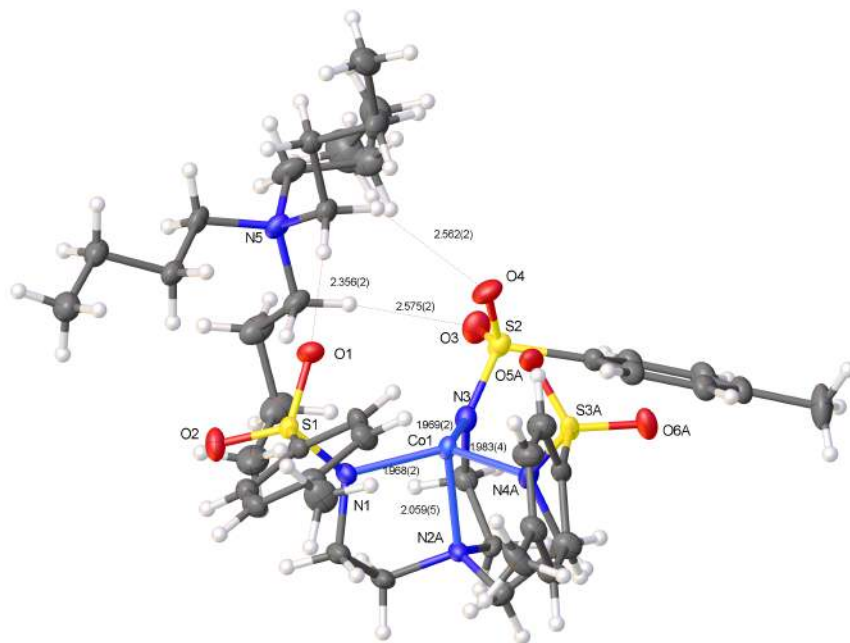

**Figure S7:** Component 1 and undisordered component.

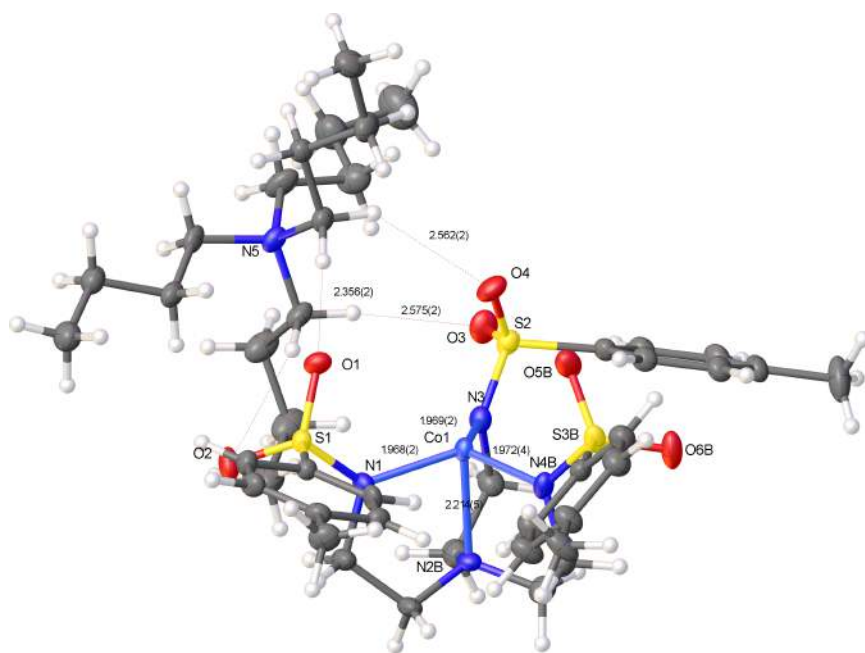

**Figure S8:** Component 2 and undisordered component.

## Data Plots: Diffraction Data

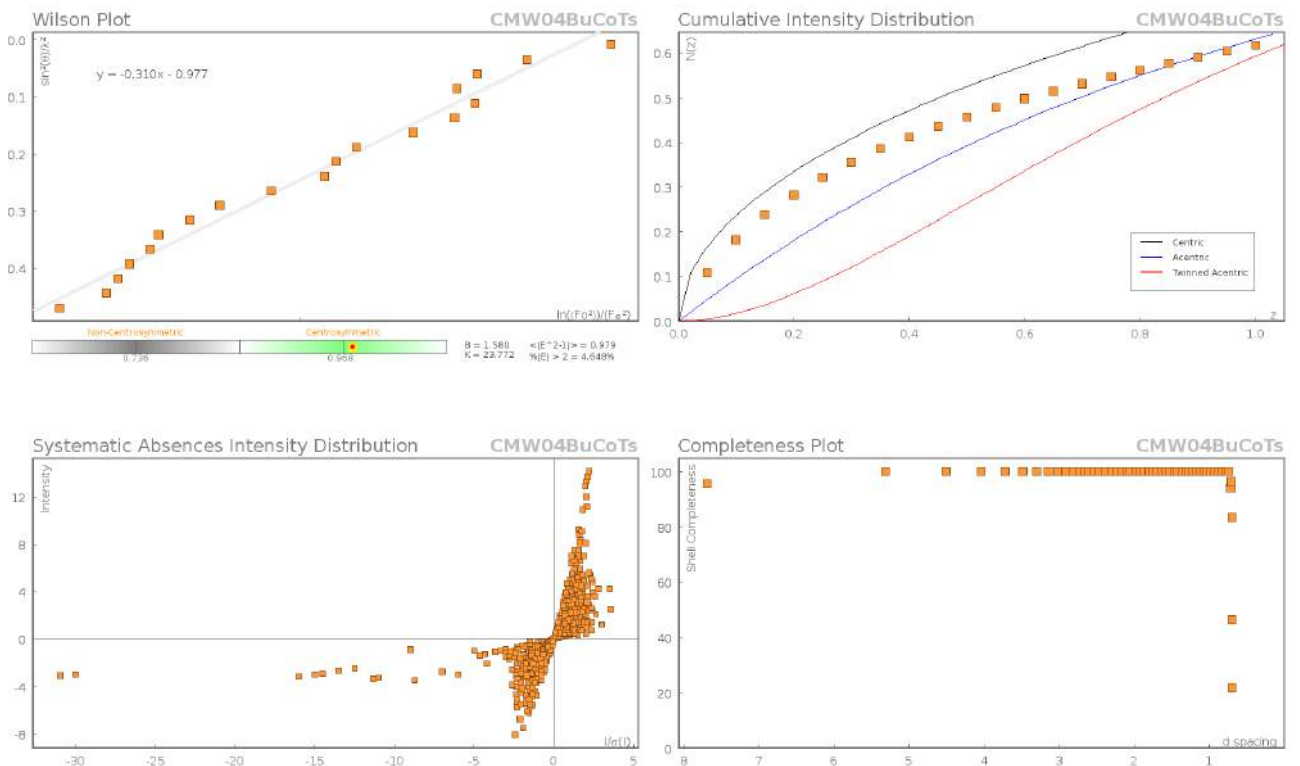

## Data Plots: Refinement and Data

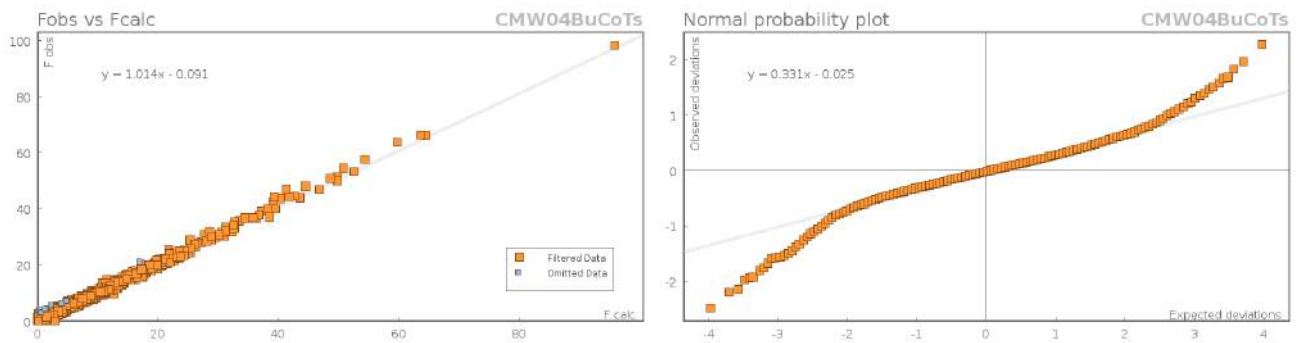

## Reflection Statistics

|                                          |              |                                          |                 |
|------------------------------------------|--------------|------------------------------------------|-----------------|
| Total reflections (after filtering)      | 106471       | Unique reflections                       | 13895           |
| Completeness                             | 0.997        | Mean $I/\sigma$                          | 17.17           |
| hkls <sub>max</sub> >max</sub> collected | (20, 21, 31) | hkls <sub>min</sub> >min</sub> collected | (-20, -21, -31) |
| hkl <sub>max</sub> used                  | (19, 21, 31) | hkl <sub>min</sub> used                  | (-20, 0, 0)     |
| Lim $d_{max}$ collected                  | 100.0        | Lim $d_{min}$ collected                  | 0.36            |
| $d_{max}$ used                           | 14.84        | $d_{min}$ used                           | 0.7             |
| Friedel pairs                            | 23750        | Friedel pairs merged                     | 1               |
| Inconsistent equivalents                 | 0            | $R_{int}$                                | 0.0651          |
| $R_{sigma}$                              | 0.0365       | Intensity transformed                    | 0               |
| Omitted reflections                      | 0            | Omitted by user (OMIT hkl)               | 54              |



Multiplicity (22470, 12299, 9794, 4957, 1381, 548) Maximum multiplicity 18  
 Removed systematic absences 2340 Filtered off (Shel/OMIT) 0

## Images of the Crystal on the Diffractometer

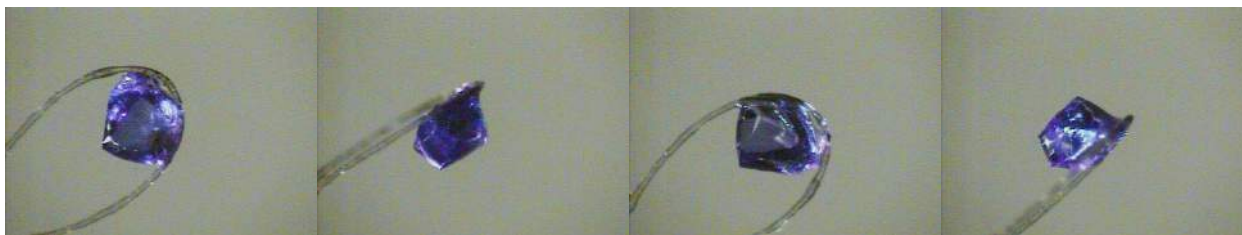

**Table S1:** Fractional Atomic Coordinates ( $\times 10^4$ ) and Equivalent Isotropic Displacement Parameters ( $\text{\AA}^2 \times 10^3$ ) for **CMW04BuCoTs**.  $U_{eq}$  is defined as 1/3 of the trace of the orthogonalised  $U_{ij}$ .

| Atom | x          | y          | z          | $U_{eq}$  |
|------|------------|------------|------------|-----------|
| Co1  | 6312.8(2)  | 5578.1(3)  | 7640.4(2)  | 17.85(10) |
| S1   | 4194.1(4)  | 5795.1(4)  | 6820.2(3)  | 17.69(13) |
| S2   | 6685.0(5)  | 4179.0(5)  | 8767.8(3)  | 21.99(14) |
| O1   | 4241.4(15) | 4822.5(14) | 6863.8(10) | 25.1(4)   |
| O2   | 3303.0(14) | 6216.0(17) | 6883.7(10) | 29.2(5)   |
| O3   | 6342.3(16) | 4027.4(17) | 9336.4(11) | 32.0(5)   |
| O4   | 6353.8(16) | 3567.0(16) | 8252.5(11) | 31.0(5)   |
| N1   | 5086.2(16) | 6185.6(15) | 7300.6(11) | 19.0(4)   |
| N3   | 6480.6(16) | 5170.2(17) | 8512.9(11) | 21.7(4)   |
| C12  | 7952.5(19) | 4076.0(18) | 8984.0(12) | 19.4(5)   |
| C13  | 8473(2)    | 4124.3(19) | 8512.8(13) | 21.8(5)   |
| C14  | 9465(2)    | 4095(2)    | 8668.3(13) | 23.2(5)   |
| C15  | 9955(2)    | 4012(2)    | 9289.3(14) | 25.4(6)   |
| C16  | 9428(2)    | 3973(2)    | 9751.0(14) | 28.4(6)   |
| C17  | 8432(2)    | 4002(2)    | 9603.0(13) | 23.4(5)   |
| C18  | 11039(2)   | 3980(3)    | 9447.1(18) | 46.1(10)  |
| N4A  | 7435(3)    | 5691(3)    | 7252.3(16) | 22.7(7)   |
| S3A  | 7828.2(14) | 4997.6(13) | 6826.0(8)  | 23.3(4)   |
| O5A  | 7131(3)    | 4272(2)    | 6679(2)    | 31.9(9)   |
| O6A  | 8807(3)    | 4727(4)    | 7073.2(19) | 36.1(10)  |
| C21A | 7829(3)    | 5541(2)    | 6101.5(15) | 21.4(9)   |
| C22A | 8129(3)    | 6423(3)    | 6037(2)    | 32.6(10)  |
| C23A | 8024(3)    | 6795(3)    | 5444(2)    | 30.6(10)  |
| C24A | 7633(3)    | 6307(3)    | 4918.7(18) | 27.6(10)  |
| C25A | 7335(3)    | 5423(3)    | 4992(2)    | 37.1(11)  |
| C26A | 7435(3)    | 5051(3)    | 5577(2)    | 37.4(11)  |
| C27A | 7509(4)    | 6701(4)    | 4269(2)    | 33.8(11)  |
| N2A  | 6774(3)    | 6816(3)    | 8033.0(17) | 19.4(8)   |
| C9A  | 5892(3)    | 7370(3)    | 7970(2)    | 25.0(8)   |
| C8A  | 5220(3)    | 7177(3)    | 7342(2)    | 22.9(9)   |
| C10A | 7217(3)    | 6637(3)    | 8698(2)    | 21.3(7)   |
| C11A | 6669(10)   | 5890(5)    | 8952(3)    | 23.6(13)  |
| C19A | 7462(3)    | 7199(3)    | 7689(2)    | 26.0(8)   |
| C20A | 8089(3)    | 6441(3)    | 7520(2)    | 26.1(8)   |
| C1A  | 4368(3)    | 6025(3)    | 6054.0(16) | 19.8(11)  |
| C2A  | 3831(3)    | 6681(3)    | 5689(2)    | 27.1(9)   |
| C3A  | 3967(3)    | 6845(3)    | 5089(2)    | 29.8(10)  |
| C4A  | 4626(3)    | 6370(3)    | 4845.8(18) | 26.7(13)  |
| C5A  | 5172(3)    | 5697(3)    | 5219(2)    | 32.2(10)  |
| C6A  | 5046(3)    | 5525(3)    | 5821(2)    | 28.5(10)  |
| C7A  | 4768(4)    | 6552(5)    | 4192(2)    | 42.1(16)  |

| Atom | x          | y          | z          | $U_{eq}$ |
|------|------------|------------|------------|----------|
| N4B  | 7414(4)    | 5888(3)    | 7265.1(19) | 22.1(9)  |
| S3B  | 7985.3(18) | 5227.5(18) | 6914.2(10) | 24.4(6)  |
| O5B  | 7501(4)    | 4361(3)    | 6868(3)    | 29.0(11) |
| O6B  | 9001(3)    | 5218(4)    | 7173(2)    | 27.6(11) |
| C21B | 7839(3)    | 5629(3)    | 6132.3(16) | 19.9(11) |
| C22B | 7334(3)    | 6413(3)    | 5917(2)    | 25.0(11) |
| C23B | 7314(4)    | 6720(3)    | 5318(2)    | 25.4(11) |
| C24B | 7786(4)    | 6266(3)    | 4927.5(18) | 25.2(12) |
| C25B | 8288(4)    | 5482(4)    | 5148(2)    | 25.3(11) |
| C26B | 8308(4)    | 5170(3)    | 5745(2)    | 25.0(11) |
| C27B | 7765(6)    | 6596(5)    | 4271(2)    | 33.8(11) |
| N2B  | 6605(3)    | 6923(3)    | 8084(2)    | 21.8(11) |
| C9B  | 5937(3)    | 7582(3)    | 7709(3)    | 25.0(8)  |
| C8B  | 4966(4)    | 7140(3)    | 7460(3)    | 22.9(9)  |
| C10B | 6439(4)    | 6849(5)    | 8728(3)    | 29.0(9)  |
| C11B | 6760(15)   | 5923(6)    | 9000(4)    | 25.9(16) |
| C19B | 7618(4)    | 7116(5)    | 8080(2)    | 28.2(9)  |
| C20B | 7840(4)    | 6784(5)    | 7466(3)    | 26.1(8)  |
| C1B  | 4302(4)    | 6140(3)    | 6065.0(17) | 15.6(13) |
| C2B  | 3515(3)    | 6177(3)    | 5571(2)    | 15(1)    |
| C3B  | 3633(3)    | 6446(3)    | 4984(2)    | 17.6(10) |
| C4B  | 4517(4)    | 6679(3)    | 4881(2)    | 17.9(14) |
| C5B  | 5320(3)    | 6638(3)    | 5387(2)    | 16.7(10) |
| C6B  | 5214(3)    | 6370(3)    | 5978(2)    | 14.9(10) |
| C7B  | 4639(5)    | 6970(4)    | 4240(2)    | 24.6(14) |
| N5   | 3444.6(17) | 3385.0(17) | 8230.0(11) | 22.1(5)  |
| C28  | 2402.8(18) | 3541(2)    | 7909.0(13) | 22.9(5)  |
| C29  | 2229.5(19) | 4258(2)    | 7405.6(14) | 23.7(5)  |
| C30  | 1176(2)    | 4240(2)    | 7057.1(15) | 28.0(6)  |
| C31  | 951(2)     | 4981(2)    | 6576.4(17) | 35.5(7)  |
| C32  | 3932(2)    | 4251(2)    | 8503.4(14) | 24.6(6)  |
| C33  | 3516(3)    | 4698(3)    | 9010.2(16) | 34.4(7)  |
| C34  | 4027(3)    | 5594(3)    | 9199.9(16) | 36.9(8)  |
| C35  | 3861(3)    | 6291(3)    | 8679.5(19) | 41.3(8)  |
| C36  | 4023.2(19) | 3056(2)    | 7769.2(13) | 21.8(5)  |
| C37  | 3600.5(19) | 2268.4(19) | 7359.2(13) | 22.2(5)  |
| C38  | 4389(2)    | 1861(2)    | 7071.5(16) | 31.0(6)  |
| C39  | 4039(3)    | 1135(2)    | 6588.5(17) | 33.7(7)  |
| C40  | 3433(2)    | 2681(2)    | 8734.1(15) | 31.9(7)  |
| C41  | 4432(4)    | 2323(5)    | 9048(3)    | 36.4(14) |
| C42  | 4390(5)    | 1720(4)    | 9624(3)    | 36.9(11) |
| C43  | 4120(6)    | 2267(6)    | 10141(3)   | 53.9(15) |
| C41B | 4371(4)    | 2455(8)    | 9188(4)    | 37.1(14) |
| C42B | 3991(5)    | 1939(7)    | 9707(4)    | 38.2(11) |
| C43B | 4806(8)    | 1508(8)    | 10169(4)   | 56.5(17) |

**Table S2:** Anisotropic Displacement Parameters ( $\times 10^4$ ) **CMW04BuCoTs**. The anisotropic displacement factor exponent takes the form:  $-2\pi^2[h^2a^{*2} \times U_{11} + \dots + 2hka^* \times b^* \times U_{12}]$

| Atom | $U_{11}$  | $U_{22}$  | $U_{33}$  | $U_{23}$ | $U_{13}$ | $U_{12}$ |
|------|-----------|-----------|-----------|----------|----------|----------|
| Co1  | 12.63(16) | 21.38(18) | 18.37(17) | 3.34(13) | 0.76(12) | 0.14(12) |
| S1   | 14.0(3)   | 19.3(3)   | 19.1(3)   | 2.0(2)   | 2.0(2)   | 0.1(2)   |
| S2   | 18.6(3)   | 24.3(3)   | 22.5(3)   | 4.2(2)   | 3.5(2)   | -3.5(2)  |
| O1   | 27(1)     | 18.8(10)  | 28.3(10)  | 4.8(8)   | 3.3(8)   | -4.7(8)  |
| O2   | 17.4(9)   | 40.7(13)  | 28.5(11)  | -0.8(9)  | 2.7(8)   | 7.4(8)   |
| O3   | 27.5(11)  | 41.1(13)  | 29.7(11)  | 11.3(10) | 11.2(9)  | -0.8(9)  |
| O4   | 28.2(11)  | 28.3(11)  | 34.3(12)  | -2.1(9)  | 1.8(9)   | -11.4(9) |
| N1   | 18.3(10)  | 16.3(9)   | 20.2(10)  | 0.5(8)   | -0.5(8)  | 2.7(7)   |

| Atom | $U_{11}$ | $U_{22}$ | $U_{33}$ | $U_{23}$ | $U_{13}$ | $U_{12}$ |
|------|----------|----------|----------|----------|----------|----------|
| N3   | 17.6(10) | 26.4(12) | 20.1(10) | 1.6(9)   | 2.1(8)   | 1.1(8)   |
| C12  | 19.1(11) | 18.0(12) | 19.8(12) | 2.9(9)   | 1.6(9)   | 1.6(9)   |
| C13  | 24.3(12) | 22.0(13) | 18.4(12) | -0.2(10) | 2.8(10)  | 1(1)     |
| C14  | 23.4(13) | 23.8(13) | 23.4(13) | -2.2(10) | 7.5(10)  | 2.9(10)  |
| C15  | 20.8(12) | 25.1(14) | 28.0(14) | -1.6(11) | 0.5(10)  | 6.3(10)  |
| C16  | 28.9(14) | 33.5(16) | 20.1(13) | 3.1(11)  | -1.0(11) | 6.1(12)  |
| C17  | 26.8(13) | 24.0(13) | 18.5(12) | 3.4(10)  | 2.8(10)  | 3.6(10)  |
| C18  | 22.0(15) | 75(3)    | 38.1(19) | -4.2(19) | -0.4(13) | 16.3(17) |
| N4A  | 14.8(12) | 27.0(16) | 26.3(13) | 7.5(11)  | 4.7(10)  | -1.6(11) |
| S3A  | 17.5(7)  | 24.9(8)  | 30.2(7)  | 13.8(6)  | 10.8(5)  | 5.6(6)   |
| O5A  | 29(2)    | 22.8(16) | 48(2)    | 9.1(15)  | 17.1(17) | 0.5(14)  |
| O6A  | 26.0(16) | 47(2)    | 37(2)    | 19(2)    | 11.5(14) | 14.1(16) |
| C21A | 17.4(18) | 20.6(17) | 27.3(16) | 5.6(13)  | 7.0(13)  | 2.7(14)  |
| C22A | 40(2)    | 31.0(19) | 26.7(18) | 2.3(15)  | 7.2(17)  | 0.0(17)  |
| C23A | 42(2)    | 22.6(19) | 28.2(17) | 2.1(14)  | 9.5(16)  | -2.1(17) |
| C24A | 29(2)    | 26.0(18) | 28.2(17) | 2.0(14)  | 5.7(15)  | 4.9(16)  |
| C25A | 41(3)    | 30(2)    | 37(2)    | -1.3(15) | 0.6(18)  | -3.4(18) |
| C26A | 38(2)    | 30(2)    | 41.6(19) | 2.4(16)  | 2.9(17)  | -1.7(18) |
| C27A | 41(3)    | 33.8(17) | 29.6(13) | 5.7(12)  | 13.8(13) | 20.8(17) |
| N2A  | 17.4(15) | 16.5(17) | 21.9(15) | -1.6(13) | -0.7(12) | -0.3(12) |
| C9A  | 23.7(12) | 14.7(15) | 33.5(18) | -0.2(13) | -0.2(13) | 1.5(11)  |
| C8A  | 20.9(17) | 16.3(12) | 30.0(19) | 1.1(11)  | 2.3(14)  | 1.0(11)  |
| C10A | 17.1(16) | 22.5(18) | 22.0(15) | -4.6(13) | -0.8(12) | -1.7(13) |
| C11A | 26(3)    | 24(2)    | 20(2)    | -4.6(18) | 3(2)     | 1.4(19)  |
| C19A | 22.2(15) | 24.3(17) | 29.2(17) | 2.2(15)  | 0.5(14)  | -4.9(13) |
| C20A | 15.4(16) | 29(2)    | 32.6(17) | 8.4(16)  | 1.7(14)  | -3.2(13) |
| C1A  | 18(2)    | 20(2)    | 20(2)    | 3.3(17)  | -0.5(17) | -0.6(17) |
| C2A  | 27(2)    | 27(2)    | 26(2)    | -0.9(18) | 3.8(17)  | 3.9(18)  |
| C3A  | 32(3)    | 25(3)    | 29(2)    | 4(2)     | 0(2)     | 4.9(19)  |
| C4A  | 28(2)    | 26(4)    | 26(2)    | 2(2)     | 5.0(17)  | -1(2)    |
| C5A  | 35(2)    | 30(2)    | 33(2)    | 1(2)     | 11(2)    | 5(2)     |
| C6A  | 25(2)    | 29(2)    | 30(2)    | 5.3(19)  | 2.8(17)  | 6.4(18)  |
| C7A  | 46(3)    | 53(4)    | 29(3)    | 11(3)    | 13(2)    | 3(3)     |
| N4B  | 15.2(14) | 25.3(18) | 26.0(15) | 9.0(14)  | 4.7(12)  | -0.6(14) |
| S3B  | 17.9(9)  | 23.7(11) | 32.4(10) | 12.9(8)  | 7.2(7)   | 1.7(8)   |
| O5B  | 22(2)    | 24.4(18) | 42(3)    | 11.2(17) | 10(2)    | 1.5(16)  |
| O6B  | 14.8(17) | 36(3)    | 32(2)    | 14(2)    | 5.5(15)  | 4.5(17)  |
| C21B | 16(2)    | 18(2)    | 25.9(18) | 3.2(15)  | 4.0(16)  | -0.9(17) |
| C22B | 30(2)    | 24(2)    | 23(2)    | 2.2(17)  | 11.2(18) | 6.1(19)  |
| C23B | 35(3)    | 17(2)    | 26(2)    | 4.7(16)  | 11.9(18) | 8(2)     |
| C24B | 30(3)    | 24(2)    | 23.7(19) | 2.9(16)  | 9.6(18)  | 8(2)     |
| C25B | 25(2)    | 22(2)    | 29(2)    | -2.4(17) | 6.3(18)  | 2.7(18)  |
| C26B | 22(2)    | 19(2)    | 33(2)    | 5.5(17)  | 4.9(17)  | 1.8(18)  |
| C27B | 41(3)    | 33.8(17) | 29.6(13) | 5.7(12)  | 13.8(13) | 20.8(17) |
| N2B  | 22.4(19) | 14(2)    | 27(2)    | -1.9(17) | 1.0(15)  | -0.6(16) |
| C9B  | 23.7(12) | 14.7(15) | 33.5(18) | -0.2(13) | -0.2(13) | 1.5(11)  |
| C8B  | 20.9(17) | 16.3(12) | 30.0(19) | 1.1(11)  | 2.3(14)  | 1.0(11)  |
| C10B | 26.5(19) | 29.0(19) | 29.1(18) | -2.4(15) | 0.7(15)  | 2.0(16)  |
| C11B | 27(3)    | 27(2)    | 22(2)    | -3.7(19) | 1(2)     | 3(2)     |
| C19B | 24.1(16) | 26.4(18) | 31.6(18) | 1.1(17)  | 0.6(15)  | -3.5(14) |
| C20B | 15.4(16) | 29(2)    | 32.6(17) | 8.4(16)  | 1.7(14)  | -3.2(13) |
| C1B  | 15(2)    | 14(2)    | 18(2)    | 0(2)     | 4(2)     | 1(2)     |
| C2B  | 11(2)    | 16(2)    | 17(2)    | 0.0(19)  | 0.2(18)  | -1.7(18) |
| C3B  | 17(2)    | 15(3)    | 18(2)    | 4(2)     | -3.2(19) | -0.7(19) |
| C4B  | 22(2)    | 12(4)    | 19(2)    | 2(2)     | 4(2)     | 4(2)     |
| C5B  | 15(2)    | 16(2)    | 20(2)    | 3.7(19)  | 7.1(19)  | -1.6(18) |
| C6B  | 9(2)     | 19(2)    | 16(2)    | 7.7(18)  | 1.0(17)  | 5.5(17)  |
| C7B  | 32(3)    | 21(3)    | 21(3)    | 6(3)     | 5(2)     | 0(3)     |

| Atom | $U_{11}$ | $U_{22}$ | $U_{33}$ | $U_{23}$  | $U_{13}$ | $U_{12}$  |
|------|----------|----------|----------|-----------|----------|-----------|
| N5   | 19.7(10) | 26.8(12) | 20.4(10) | 0.9(9)    | 5.8(8)   | -6.7(9)   |
| C28  | 14.1(11) | 31.6(15) | 24.2(13) | -3.4(11)  | 7.1(9)   | -4.7(10)  |
| C29  | 17.8(12) | 26.1(14) | 28.3(14) | -2.8(11)  | 7.3(10)  | -3.8(10)  |
| C30  | 20.5(13) | 31.5(16) | 31.3(15) | -3.7(12)  | 4.5(11)  | -3.1(11)  |
| C31  | 28.1(15) | 33.8(17) | 41.6(18) | -0.4(14)  | 1.0(13)  | -0.2(13)  |
| C32  | 22.9(13) | 27.9(14) | 23.2(13) | -3.4(11)  | 5.4(10)  | -9(1)     |
| C33  | 38.4(17) | 41.4(19) | 26.7(15) | -9.4(13)  | 14.0(13) | -14.2(14) |
| C34  | 38.6(17) | 45(2)    | 29.5(16) | -15.8(14) | 12.1(13) | -12.1(15) |
| C35  | 38.8(18) | 35.1(19) | 49(2)    | -12.5(16) | 6.3(16)  | -3.3(15)  |
| C36  | 16.6(11) | 24.4(13) | 24.8(13) | 0.8(10)   | 5.8(9)   | -1.7(9)   |
| C37  | 20.0(12) | 20.9(13) | 25.7(13) | 2.4(10)   | 5.1(10)  | -0.6(9)   |
| C38  | 21.9(13) | 34.5(17) | 39.0(17) | -4.7(13)  | 11.4(12) | -2.2(12)  |
| C39  | 37.3(17) | 27.6(16) | 39.7(18) | -1.9(13)  | 16.0(14) | 3.2(13)   |
| C40  | 36.4(16) | 34.9(17) | 23.8(14) | 5.7(12)   | 5.4(12)  | -15.6(13) |
| C41  | 42.4(18) | 36(2)    | 26(2)    | 2.4(19)   | -2.7(15) | -5.4(15)  |
| C42  | 37(3)    | 42(3)    | 31.4(19) | 7.6(18)   | 5.4(18)  | 7(2)      |
| C43  | 61(3)    | 65(4)    | 33(2)    | 5(2)      | 4(2)     | 15(3)     |
| C41B | 43.2(18) | 37(2)    | 26(2)    | 3(2)      | -3.1(15) | -5.7(16)  |
| C42B | 38(3)    | 43(3)    | 32(2)    | 8.0(19)   | 5.1(19)  | 6(2)      |
| C43B | 62(3)    | 68(4)    | 36(2)    | 8(2)      | 3(2)     | 17(3)     |

**Table S3:** Bond Lengths in Å for CMW04BuCoTs.

| Atom | Atom | Length/Å  | Atom | Atom | Length/Å |
|------|------|-----------|------|------|----------|
| Co1  | N1   | 1.967(2)  | C23A | C24A | 1.372(6) |
| Co1  | N3   | 1.970(2)  | C24A | C25A | 1.399(6) |
| Co1  | N4A  | 1.976(3)  | C24A | C27A | 1.514(5) |
| Co1  | N2A  | 2.075(4)  | C25A | C26A | 1.376(7) |
| Co1  | N4B  | 1.979(4)  | N2A  | C9A  | 1.484(5) |
| Co1  | N2B  | 2.220(5)  | N2A  | C10A | 1.482(5) |
| S1   | O1   | 1.447(2)  | N2A  | C19A | 1.475(5) |
| S1   | O2   | 1.451(2)  | C9A  | C8A  | 1.526(4) |
| S1   | N1   | 1.577(2)  | C10A | C11A | 1.528(6) |
| S1   | C1A  | 1.783(3)  | C19A | C20A | 1.532(5) |
| S1   | C1B  | 1.770(3)  | C1A  | C2A  | 1.382(5) |
| S2   | O3   | 1.451(2)  | C1A  | C6A  | 1.400(5) |
| S2   | O4   | 1.447(2)  | C2A  | C3A  | 1.391(6) |
| S2   | N3   | 1.578(3)  | C3A  | C4A  | 1.373(6) |
| S2   | C12  | 1.775(3)  | C4A  | C5A  | 1.414(6) |
| N1   | C8A  | 1.484(4)  | C4A  | C7A  | 1.514(5) |
| N1   | C8B  | 1.478(5)  | C5A  | C6A  | 1.394(6) |
| N3   | C11A | 1.423(8)  | N4B  | S3B  | 1.577(4) |
| N3   | C11B | 1.536(13) | N4B  | C20B | 1.489(6) |
| C12  | C13  | 1.398(4)  | S3B  | O5B  | 1.454(4) |
| C12  | C17  | 1.386(4)  | S3B  | O6B  | 1.438(3) |
| C13  | C14  | 1.384(4)  | S3B  | C21B | 1.783(3) |
| C14  | C15  | 1.395(4)  | C21B | C22B | 1.397(6) |
| C15  | C16  | 1.387(4)  | C21B | C26B | 1.370(6) |
| C15  | C18  | 1.511(4)  | C22B | C23B | 1.384(6) |
| C16  | C17  | 1.388(4)  | C23B | C24B | 1.375(6) |
| N4A  | S3A  | 1.572(4)  | C24B | C25B | 1.396(6) |
| N4A  | C20A | 1.489(5)  | C24B | C27B | 1.514(5) |
| S3A  | O5A  | 1.455(4)  | C25B | C26B | 1.385(7) |
| S3A  | O6A  | 1.442(3)  | N2B  | C9B  | 1.484(5) |
| S3A  | C21A | 1.781(3)  | N2B  | C10B | 1.485(5) |
| C21A | C22A | 1.394(6)  | N2B  | C19B | 1.476(5) |
| C21A | C26A | 1.373(6)  | C9B  | C8B  | 1.523(4) |
| C22A | C23A | 1.390(6)  | C10B | C11B | 1.528(5) |

| Atom | Atom | Length/Å |
|------|------|----------|
| C19B | C20B | 1.530(5) |
| C1B  | C2B  | 1.382(5) |
| C1B  | C6B  | 1.399(6) |
| C2B  | C3B  | 1.392(6) |
| C3B  | C4B  | 1.374(6) |
| C4B  | C5B  | 1.414(6) |
| C4B  | C7B  | 1.514(5) |
| C5B  | C6B  | 1.394(6) |
| N5   | C28  | 1.519(4) |
| N5   | C32  | 1.522(4) |
| N5   | C36  | 1.517(4) |
| N5   | C40  | 1.523(4) |
| C28  | C29  | 1.515(4) |
| C29  | C30  | 1.533(4) |

| Atom | Atom | Length/Å |
|------|------|----------|
| C30  | C31  | 1.509(5) |
| C32  | C33  | 1.520(4) |
| C33  | C34  | 1.531(5) |
| C34  | C35  | 1.519(6) |
| C36  | C37  | 1.518(4) |
| C37  | C38  | 1.529(4) |
| C38  | C39  | 1.518(5) |
| C40  | C41  | 1.537(6) |
| C40  | C41B | 1.523(6) |
| C41  | C42  | 1.560(6) |
| C42  | C43  | 1.510(7) |
| C41B | C42B | 1.561(6) |
| C42B | C43B | 1.510(7) |

**Table S4:** Bond Angles in ° for CMW04BuCoTs.

| Atom | Atom | Atom | Angle/°    |
|------|------|------|------------|
| N1   | Co1  | N3   | 114.84(10) |
| N1   | Co1  | N4A  | 122.42(13) |
| N1   | Co1  | N2A  | 85.84(12)  |
| N1   | Co1  | N4B  | 117.25(16) |
| N1   | Co1  | N2B  | 79.70(14)  |
| N3   | Co1  | N4A  | 120.24(13) |
| N3   | Co1  | N2A  | 84.75(12)  |
| N3   | Co1  | N4B  | 122.25(16) |
| N3   | Co1  | N2B  | 83.10(13)  |
| N4A  | Co1  | N2A  | 83.67(17)  |
| N4B  | Co1  | N2B  | 83.20(18)  |
| O1   | S1   | O2   | 116.91(14) |
| O1   | S1   | N1   | 107.64(12) |
| O1   | S1   | C1A  | 103.85(19) |
| O1   | S1   | C1B  | 109.76(18) |
| O2   | S1   | N1   | 112.08(13) |
| O2   | S1   | C1A  | 108.12(17) |
| O2   | S1   | C1B  | 102.70(18) |
| N1   | S1   | C1A  | 107.59(15) |
| N1   | S1   | C1B  | 107.3(2)   |
| O3   | S2   | N3   | 112.20(14) |
| O3   | S2   | C12  | 105.69(13) |
| O4   | S2   | O3   | 117.33(14) |
| O4   | S2   | N3   | 107.73(13) |
| O4   | S2   | C12  | 107.26(14) |
| N3   | S2   | C12  | 105.94(13) |
| S1   | N1   | Co1  | 127.48(14) |
| C8A  | N1   | Co1  | 109.8(2)   |
| C8A  | N1   | S1   | 118.7(2)   |
| C8B  | N1   | Co1  | 119.3(2)   |
| C8B  | N1   | S1   | 113.1(2)   |
| S2   | N3   | Co1  | 127.19(15) |
| C11A | N3   | Co1  | 113.0(2)   |
| C11A | N3   | S2   | 117.8(3)   |
| C11B | N3   | Co1  | 114.2(2)   |
| C11B | N3   | S2   | 115.6(3)   |
| C13  | C12  | S2   | 118.2(2)   |
| C17  | C12  | S2   | 121.9(2)   |
| C17  | C12  | C13  | 119.9(3)   |

| Atom | Atom | Atom | Angle/°    |
|------|------|------|------------|
| C14  | C13  | C12  | 119.7(3)   |
| C13  | C14  | C15  | 120.9(3)   |
| C14  | C15  | C18  | 119.9(3)   |
| C16  | C15  | C14  | 118.6(3)   |
| C16  | C15  | C18  | 121.5(3)   |
| C17  | C16  | C15  | 121.2(3)   |
| C12  | C17  | C16  | 119.7(3)   |
| S3A  | N4A  | Co1  | 128.8(3)   |
| C20A | N4A  | Co1  | 113.0(3)   |
| C20A | N4A  | S3A  | 116.7(3)   |
| N4A  | S3A  | C21A | 107.60(17) |
| O5A  | S3A  | N4A  | 107.54(18) |
| O5A  | S3A  | C21A | 105.7(2)   |
| O6A  | S3A  | N4A  | 113.6(2)   |
| O6A  | S3A  | O5A  | 115.9(3)   |
| O6A  | S3A  | C21A | 105.92(16) |
| C22A | C21A | S3A  | 125.1(3)   |
| C26A | C21A | S3A  | 115.3(3)   |
| C26A | C21A | C22A | 119.4(3)   |
| C23A | C22A | C21A | 119.6(4)   |
| C24A | C23A | C22A | 121.1(4)   |
| C23A | C24A | C25A | 118.5(4)   |
| C23A | C24A | C27A | 121.9(4)   |
| C25A | C24A | C27A | 119.6(4)   |
| C26A | C25A | C24A | 120.7(4)   |
| C21A | C26A | C25A | 120.6(4)   |
| C9A  | N2A  | Co1  | 105.4(2)   |
| C10A | N2A  | Co1  | 106.1(3)   |
| C10A | N2A  | C9A  | 111.4(3)   |
| C19A | N2A  | Co1  | 108.4(3)   |
| C19A | N2A  | C9A  | 112.6(3)   |
| C19A | N2A  | C10A | 112.4(3)   |
| N2A  | C9A  | C8A  | 109.6(3)   |
| N1   | C8A  | C9A  | 106.8(3)   |
| N2A  | C10A | C11A | 110.2(4)   |
| N3   | C11A | C10A | 109.6(5)   |
| N2A  | C19A | C20A | 109.2(3)   |
| N4A  | C20A | C19A | 107.1(3)   |
| C2A  | C1A  | S1   | 120.5(3)   |

| Atom | Atom | Atom | Angle/°    |
|------|------|------|------------|
| C2A  | C1A  | C6A  | 120.2(3)   |
| C6A  | C1A  | S1   | 119.3(3)   |
| C1A  | C2A  | C3A  | 119.8(4)   |
| C4A  | C3A  | C2A  | 121.6(4)   |
| C3A  | C4A  | C5A  | 118.5(4)   |
| C3A  | C4A  | C7A  | 121.3(4)   |
| C5A  | C4A  | C7A  | 120.3(4)   |
| C6A  | C5A  | C4A  | 120.6(4)   |
| C5A  | C6A  | C1A  | 119.3(3)   |
| S3B  | N4B  | Co1  | 126.8(3)   |
| C20B | N4B  | Co1  | 113.3(3)   |
| C20B | N4B  | S3B  | 118.5(4)   |
| N4B  | S3B  | C21B | 107.17(18) |
| O5B  | S3B  | N4B  | 107.24(19) |
| O5B  | S3B  | C21B | 105.8(2)   |
| O6B  | S3B  | N4B  | 113.3(3)   |
| O6B  | S3B  | O5B  | 116.3(3)   |
| O6B  | S3B  | C21B | 106.38(18) |
| C22B | C21B | S3B  | 123.2(3)   |
| C26B | C21B | S3B  | 117.2(3)   |
| C26B | C21B | C22B | 119.4(3)   |
| C23B | C22B | C21B | 119.9(4)   |
| C24B | C23B | C22B | 121.1(4)   |
| C23B | C24B | C25B | 118.5(4)   |
| C23B | C24B | C27B | 121.4(4)   |
| C25B | C24B | C27B | 120.1(4)   |
| C26B | C25B | C24B | 120.7(4)   |
| C21B | C26B | C25B | 120.4(4)   |
| C9B  | N2B  | Co1  | 108.2(3)   |
| C9B  | N2B  | C10B | 111.1(4)   |
| C10B | N2B  | Co1  | 107.2(3)   |
| C19B | N2B  | Co1  | 105.3(3)   |
| C19B | N2B  | C9B  | 112.5(3)   |
| C19B | N2B  | C10B | 112.1(3)   |
| N2B  | C9B  | C8B  | 110.0(3)   |
| N1   | C8B  | C9B  | 110.8(4)   |
| N2B  | C10B | C11B | 110.0(4)   |
| C10B | C11B | N3   | 111.8(7)   |
| N2B  | C19B | C20B | 109.4(3)   |
| N4B  | C20B | C19B | 113.5(4)   |
| C2B  | C1B  | S1   | 121.6(4)   |
| C2B  | C1B  | C6B  | 120.4(3)   |
| C6B  | C1B  | S1   | 118.0(3)   |
| C1B  | C2B  | C3B  | 119.7(4)   |
| C4B  | C3B  | C2B  | 121.6(4)   |
| C3B  | C4B  | C5B  | 118.6(4)   |
| C3B  | C4B  | C7B  | 121.2(4)   |
| C5B  | C4B  | C7B  | 120.2(4)   |
| C6B  | C5B  | C4B  | 120.6(4)   |
| C5B  | C6B  | C1B  | 119.2(3)   |
| C28  | N5   | C32  | 111.9(2)   |
| C28  | N5   | C40  | 106.1(2)   |
| C32  | N5   | C40  | 111.7(2)   |
| C36  | N5   | C28  | 111.1(2)   |
| C36  | N5   | C32  | 105.4(2)   |
| C36  | N5   | C40  | 110.8(2)   |
| C29  | C28  | N5   | 115.7(2)   |
| C28  | C29  | C30  | 109.8(2)   |

| Atom | Atom | Atom | Angle/°  |
|------|------|------|----------|
| C31  | C30  | C29  | 111.9(3) |
| C33  | C32  | N5   | 116.0(2) |
| C32  | C33  | C34  | 109.8(3) |
| C35  | C34  | C33  | 113.5(3) |
| N5   | C36  | C37  | 116.0(2) |
| C36  | C37  | C38  | 108.4(2) |
| C39  | C38  | C37  | 114.1(3) |
| N5   | C40  | C41  | 114.0(3) |
| C41B | C40  | N5   | 118.7(4) |
| C40  | C41  | C42  | 111.5(4) |
| C43  | C42  | C41  | 111.1(5) |
| C40  | C41B | C42B | 100.9(5) |
| C43B | C42B | C41B | 110.9(5) |

**Table S5:** Hydrogen Fractional Atomic Coordinates ( $\times 10^4$ ) and Equivalent Isotropic Displacement Parameters ( $\text{\AA}^2 \times 10^3$ ) for **CMW04BuCoTs**.  $U_{eq}$  is defined as 1/3 of the trace of the orthogonalised  $U_{ij}$ .

| Atom | x     | y    | z     | $U_{eq}$ |
|------|-------|------|-------|----------|
| H13  | 8148  | 4177 | 8088  | 26       |
| H14  | 9818  | 4131 | 8348  | 28       |
| H16  | 9753  | 3925 | 10176 | 34       |
| H17  | 8081  | 3971 | 9925  | 28       |
| H18A | 11259 | 3450 | 9250  | 69       |
| H18B | 11267 | 3942 | 9901  | 69       |
| H18C | 11294 | 4527 | 9292  | 69       |
| H22A | 8402  | 6768 | 6396  | 39       |
| H23A | 8228  | 7396 | 5401  | 37       |
| H25A | 7060  | 5076 | 4634  | 45       |
| H26A | 7230  | 4450 | 5620  | 45       |
| H27A | 7222  | 7302 | 4261  | 51       |
| H27B | 7089  | 6310 | 3969  | 51       |
| H27C | 8137  | 6747 | 4158  | 51       |
| H9AA | 6063  | 8017 | 7999  | 30       |
| H9AB | 5565  | 7225 | 8313  | 30       |
| H8AA | 4596  | 7482 | 7316  | 27       |
| H8AB | 5505  | 7396 | 6995  | 27       |
| H10A | 7207  | 7193 | 8946  | 26       |
| H10B | 7894  | 6453 | 8737  | 26       |
| H11A | 7054  | 5666 | 9354  | 28       |
| H11B | 6057  | 6131 | 9027  | 28       |
| H19A | 7869  | 7654 | 7951  | 31       |
| H19B | 7111  | 7499 | 7303  | 31       |
| H20A | 8452  | 6656 | 7211  | 31       |
| H20B | 8553  | 6234 | 7898  | 31       |
| H2A  | 3371  | 7020 | 5848  | 33       |
| H3A  | 3593  | 7297 | 4842  | 36       |
| H5A  | 5630  | 5359 | 5058  | 39       |
| H6A  | 5415  | 5073 | 6071  | 34       |
| H7AA | 4208  | 6336 | 3886  | 63       |
| H7AB | 5344  | 6237 | 4130  | 63       |
| H7AC | 4844  | 7201 | 4137  | 63       |
| H22B | 7005  | 6736 | 6181  | 30       |
| H23B | 6968  | 7254 | 5174  | 30       |
| H25B | 8619  | 5161 | 4884  | 30       |
| H26B | 8649  | 4633 | 5888  | 30       |
| H27D | 7263  | 6276 | 3975  | 51       |
| H27E | 8389  | 6482 | 4167  | 51       |
| H27F | 7631  | 7244 | 4247  | 51       |
| H9BA | 6206  | 7799 | 7355  | 30       |
| H9BB | 5857  | 8106 | 7972  | 30       |
| H8BA | 4573  | 7178 | 7780  | 27       |
| H8BB | 4625  | 7467 | 7083  | 27       |
| H10C | 5749  | 6935 | 8720  | 35       |
| H10D | 6804  | 7325 | 8994  | 35       |
| H11C | 6462  | 5802 | 9360  | 31       |
| H11D | 7465  | 5923 | 9154  | 31       |

| <b>Atom</b> | <b>x</b> | <b>y</b> | <b>z</b> | <b><i>U<sub>eq</sub></i></b> |
|-------------|----------|----------|----------|------------------------------|
| H19C        | 8042     | 6809     | 8437     | 34                           |
| H19D        | 7738     | 7773     | 8124     | 34                           |
| H20C        | 7595     | 7231     | 7134     | 31                           |
| H20D        | 8545     | 6748     | 7513     | 31                           |
| H2B         | 2896     | 6020     | 5633     | 18                           |
| H3B         | 3089     | 6469     | 4647     | 21                           |
| H5B         | 5938     | 6794     | 5323     | 20                           |
| H6B         | 5755     | 6343     | 6317     | 18                           |
| H7BA        | 4132     | 6699     | 3920     | 37                           |
| H7BB        | 5267     | 6770     | 4179     | 37                           |
| H7BC        | 4598     | 7628     | 4208     | 37                           |
| H28A        | 2134     | 2965     | 7720     | 27                           |
| H28B        | 2043     | 3708     | 8231     | 27                           |
| H29A        | 2649     | 4148     | 7108     | 28                           |
| H29B        | 2388     | 4858     | 7597     | 28                           |
| H30A        | 1032     | 3650     | 6848     | 34                           |
| H30B        | 760      | 4307     | 7362     | 34                           |
| H31A        | 1370     | 4923     | 6278     | 53                           |
| H31B        | 1057     | 5567     | 6785     | 53                           |
| H31C        | 279      | 4933     | 6354     | 53                           |
| H3          | 4617     | 4119     | 8678     | 29                           |
| H2          | 3904     | 4689     | 8159     | 29                           |
| H33A        | 3597     | 4296     | 9378     | 41                           |
| H33B        | 2821     | 4805     | 8853     | 41                           |
| H34A        | 3801     | 5843     | 9562     | 44                           |
| H34B        | 4724     | 5481     | 9335     | 44                           |
| H35A        | 4200     | 6107     | 8356     | 62                           |
| H35B        | 4103     | 6877     | 8850     | 62                           |
| H35C        | 3172     | 6337     | 8497     | 62                           |
| H4          | 4668     | 2880     | 8006     | 26                           |
| H1          | 4108     | 3565     | 7495     | 26                           |
| H37A        | 3062     | 2477     | 7025     | 27                           |
| H37B        | 3353     | 1810     | 7612     | 27                           |
| H38A        | 4691     | 2348     | 6873     | 37                           |
| H38B        | 4889     | 1601     | 7410     | 37                           |
| H39A        | 3567     | 1393     | 6240     | 51                           |
| H39B        | 3740     | 647      | 6780     | 51                           |
| H39C        | 4583     | 896      | 6433     | 51                           |
| H40A        | 3029     | 2168     | 8546     | 38                           |
| H40B        | 3132     | 2948     | 9059     | 38                           |
| H40C        | 2971     | 2884     | 8983     | 38                           |
| H40D        | 3177     | 2115     | 8523     | 38                           |
| H41A        | 4869     | 2838     | 9183     | 44                           |
| H41B        | 4695     | 1968     | 8741     | 44                           |
| H42A        | 3913     | 1235     | 9496     | 44                           |
| H42B        | 5024     | 1436     | 9780     | 44                           |
| H43A        | 3500     | 2561     | 9985     | 81                           |
| H43B        | 4612     | 2726     | 10285    | 81                           |
| H43C        | 4073     | 1869     | 10490    | 81                           |
| H41C        | 4727     | 3006     | 9355     | 44                           |
| H41D        | 4788     | 2068     | 8992     | 44                           |
| H42C        | 3646     | 2364     | 9929     | 46                           |
| H42D        | 3532     | 1468     | 9511     | 46                           |



| <b>Atom</b> | <b>x</b> | <b>y</b> | <b>z</b> | <b><math>U_{eq}</math></b> |
|-------------|----------|----------|----------|----------------------------|
| H43D        | 5074     | 1012     | 9966     | 85                         |
| H43E        | 4567     | 1276     | 10525    | 85                         |
| H43F        | 5307     | 1958     | 10316    | 85                         |

Submitted by: **Christian Wallen**

Emory University

Solved by: **Marika Wieliczko**Sample ID: **MW03045**

## Crystal Data and Experimental

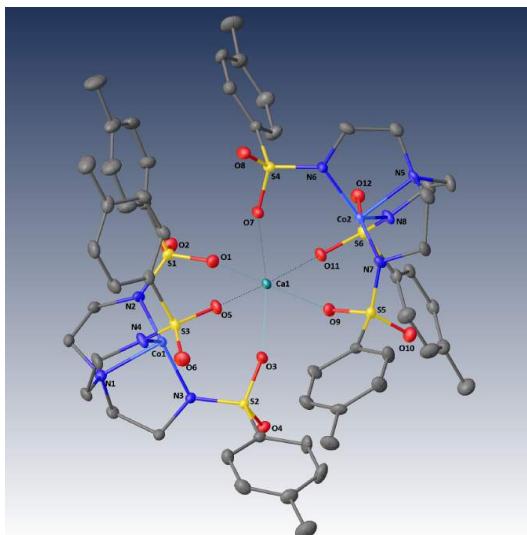

**Experimental.** Single clear bluish violet hexagonal-shaped crystals of (**MW03045**) were recrystallised from toluene by slow evaporation. A suitable crystal (0.33×0.28×0.07) was selected and mounted on a loop with paratone oil on a Bruker APEX-II CCD diffractometer. The crystal was cooled to  $T = 109.01$  K during data collection. The structure was solved with the **Superflip** (L. Palatinus & G. Chapuis, 2007) structure solution program using charge flipping methods and by using **Olex2** (Dolomanov et al., 2009) as the graphical interface. The crystal structure was refined with version of **XL** (Sheldrick, 2008) using Least Squares minimisation.

**Crystal Data.**  $C_{54}H_{66}CaCo_2N_8O_{12}S_6$ ,  $M_r = 1369.44$ , monoclinic,  $P2_1$  (No. 4),  $a = 13.9236(11)$  Å,  $b = 13.3642(10)$  Å,  $c = 17.2950(13)$  Å,  $\beta = 112.3550(10)^\circ$ ,  $\alpha = \gamma = 90^\circ$ ,  $V = 2976.3(4)$  Å<sup>3</sup>,  $T = 109.01$  K,  $Z = 2$ ,  $Z' = 1$ ,  $\mu(\text{MoK}\alpha) = 0.921$ , 22136 reflections measured, 14778 unique ( $R_{int} = 0.0328$ ) which were used in all calculations. The final  $wR_2$  was 0.1150 (all data) and  $R_1$  was 0.0476 ( $I > 2(I)$ ).

| Compound                     | MW03045                          |
|------------------------------|----------------------------------|
| Formula                      | $C_{54}H_{66}CaCo_2N_8O_{12}S_6$ |
| $D_{calc.}/g\text{ cm}^{-3}$ | 1.528                            |
| $\mu/\text{mm}^{-1}$         | 0.921                            |
| Formula Weight               | 1369.44                          |
| Colour                       | clear bluish violet              |
| Shape                        | hexagonal                        |
| Max Size/mm                  | 0.33                             |
| Mid Size/mm                  | 0.28                             |
| Min Size/mm                  | 0.07                             |
| $T/\text{K}$                 | 109.01                           |
| Crystal System               | monoclinic                       |
| Flack Parameter              | 0.202(8)                         |
| Hooft Parameter              | 0.200(8)                         |
| Space Group                  | $P2_1$                           |
| $a/\text{Å}$                 | 13.9236(11)                      |
| $b/\text{Å}$                 | 13.3642(10)                      |
| $c/\text{Å}$                 | 17.2950(13)                      |
| $\alpha/^\circ$              | 90                               |
| $\beta/^\circ$               | 112.3550(10)                     |
| $\gamma/^\circ$              | 90                               |
| $V/\text{Å}^3$               | 2976.3(4)                        |
| $Z$                          | 2                                |
| $Z'$                         | 1                                |
| $\Theta_{min}/^\circ$        | 1.581                            |
| $\Theta_{max}/^\circ$        | 29.216                           |
| Measured Refl.               | 22136                            |
| Independent Refl.            | 14778                            |
| $I > 2\sigma(I)$             | 13032                            |
| $R_{int}$                    | 0.0328                           |
| Parameters                   | 754                              |
| Restraints                   | 1                                |
| Largest Peak                 | 1.052                            |
| Deepest Hole                 | -0.448                           |
| GooF                         | 1.009                            |
| $wR_2$ (all data)            | 0.1150                           |
| $wR_2$                       | 0.1096                           |
| $R_1$ (all data)             | 0.0561                           |
| $R_1$                        | 0.0476                           |
| CCDC #                       | 1434437                          |

## Structure Quality Indicators

|                     |       |        |            |      |                  |       |          |       |
|---------------------|-------|--------|------------|------|------------------|-------|----------|-------|
| <b>Reflections:</b> | d min | 0.73   | $I/\sigma$ | 10.9 | R <sub>int</sub> | 3.28% | complete | 91%   |
| <b>Refinement:</b>  | Shift | -0.001 | Max Peak   | 1.1  | Min Peak         | -0.5  | Goof     | 1.009 |

A clear bluish violet hexagonal-shaped crystal with dimensions 0.33×0.28×0.07 mm was mounted on a loop with paratone oil. X-ray diffraction data were collected using a Bruker APEX-II CCD diffractometer equipped with an Oxford low-temperature apparatus operating at  $T = 109.01$  K.

Data were measured using  $\phi$  using MoK $\alpha$  radiation (fine-focus sealed tube, 45 kV, 35 mA). The total number of runs and images was based on the strategy calculation from the program **APEX2** (Bruker, 2014). The maximum resolution achieved was  $\theta = 29.216^\circ$ .

Unit cell indexing was performed by using the **APEX2** (Bruker, 2014) software and refined using **SAINT** (Bruker, V8.27A, 2012) on 7388 reflections, 33% of the observed reflections. Data reduction, scaling and absorption corrections were performed using **SAINT** (Bruker, V8.27A, 2012) and **SADABS-2012/1** (Bruker, 2012) was used for absorption correction.  $wR_2(\text{int})$  was 0.0641 before and 0.0505 after correction. The Ratio of minimum to maximum transmission is 0.7802. The  $\lambda/2$  correction factor is 0.0015. software which corrects for Lorentz polarisation. The final completeness is 100.00% out to 29.216 in  $\theta$ . The absorption coefficient ( $\mu$ ) of this material is 0.921 mm<sup>-1</sup> and the minimum and maximum transmissions are 0.5819 and 0.7458.

The structure was solved in the space group P1 with the **Superflip** (L. Palatinus & G. Chapuis, 2007) structure solution program using charge flipping methods. The space group P2<sub>1</sub> (# 4) was determined by the **Superflip** (L. Palatinus & G. Chapuis, 2007) structure solution program. The crystal structure was refined by Least Squares using version of **XL** (Sheldrick, 2008). All non-hydrogen atoms were refined anisotropically. Hydrogen atom positions were calculated geometrically and refined using the riding model.

There are two independent molecules in the asymmetric unit.

The Flack parameter was refined to 0.202(8). Determination of absolute structure using Bayesian statistics on Bijvoet differences using the Olex2 results in 0.200(8). Note: The Flack parameter is used to determine chirality of the crystal studied, the value should be near 0, a value of 1 means that the stereochemistry is wrong and the model should be inverted. A value of 0.5 means that the crystal consists of a racemic mixture of the two enantiomers.

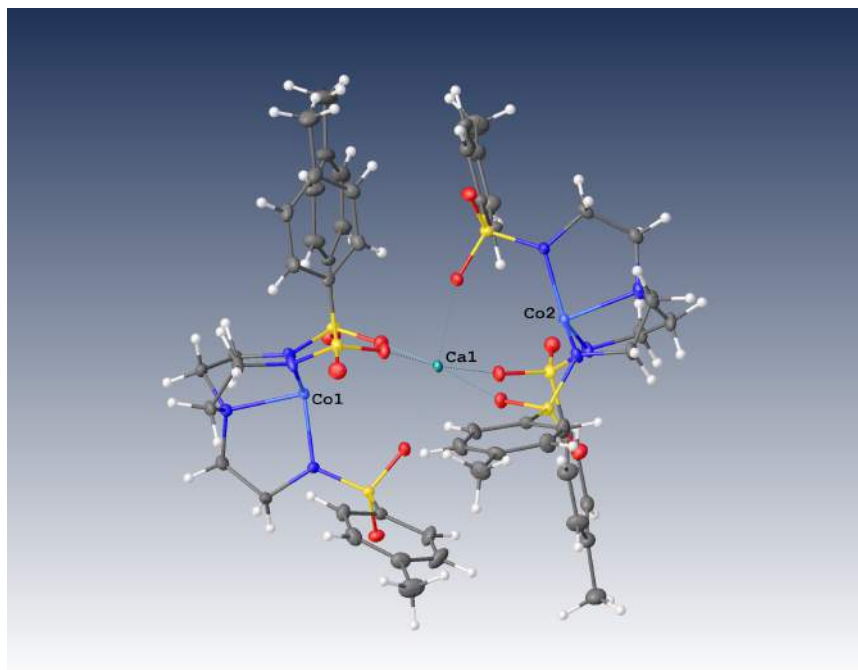

Figure S9:

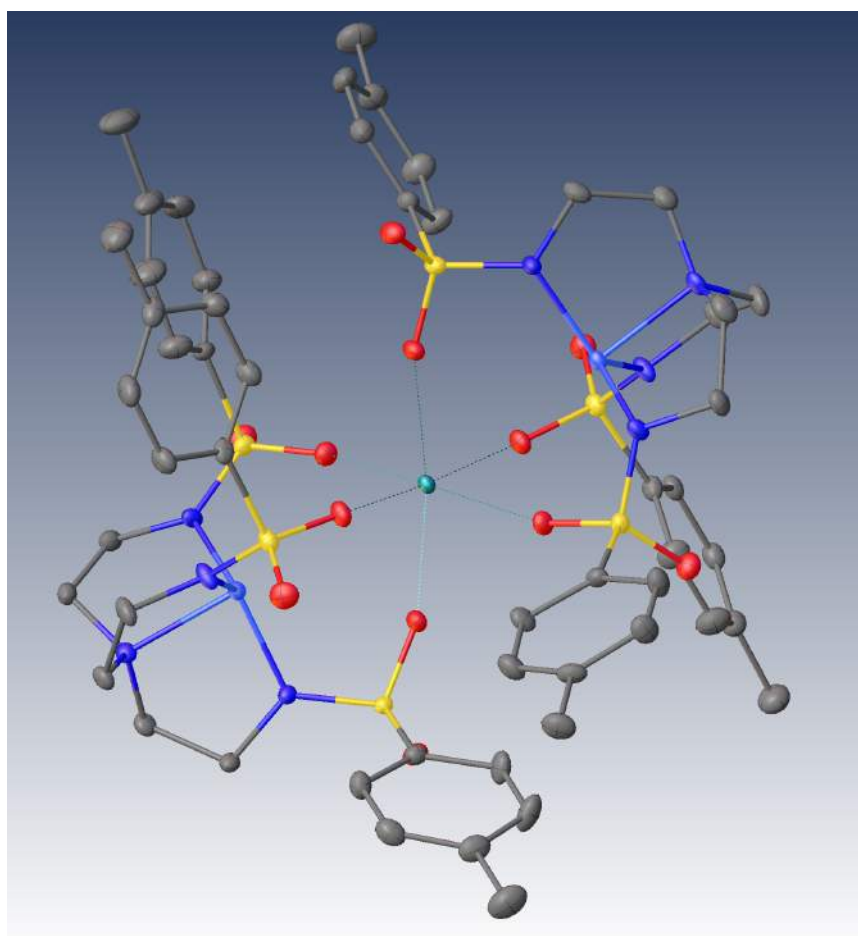

Figure S10:

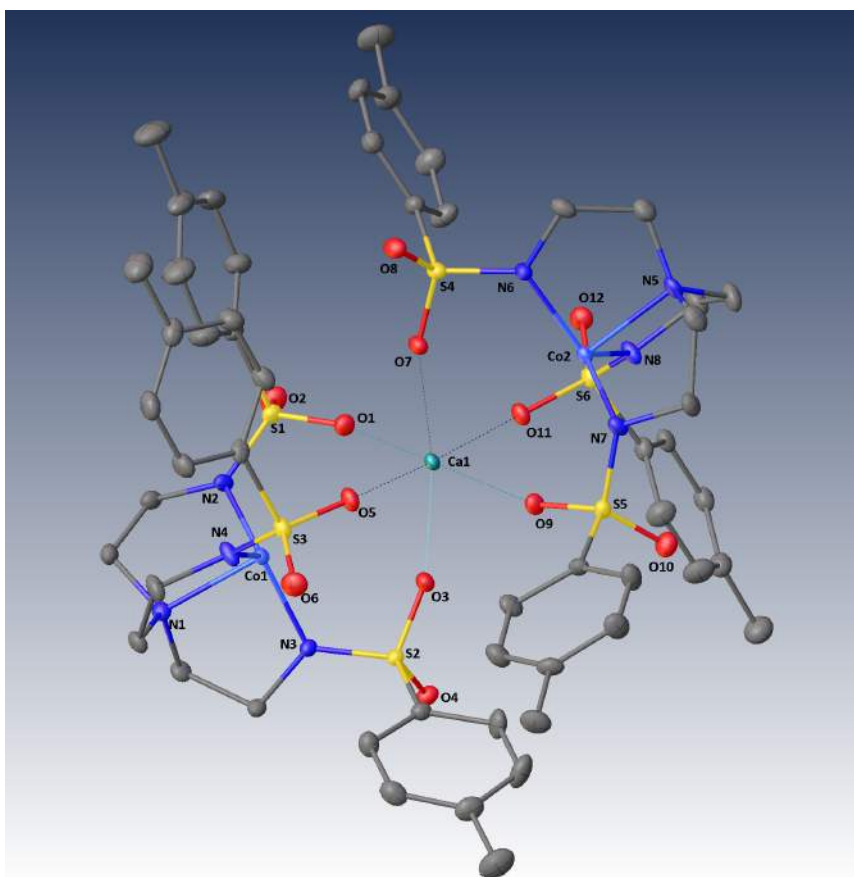

Figure S11:

### Data Plots: Diffraction Data

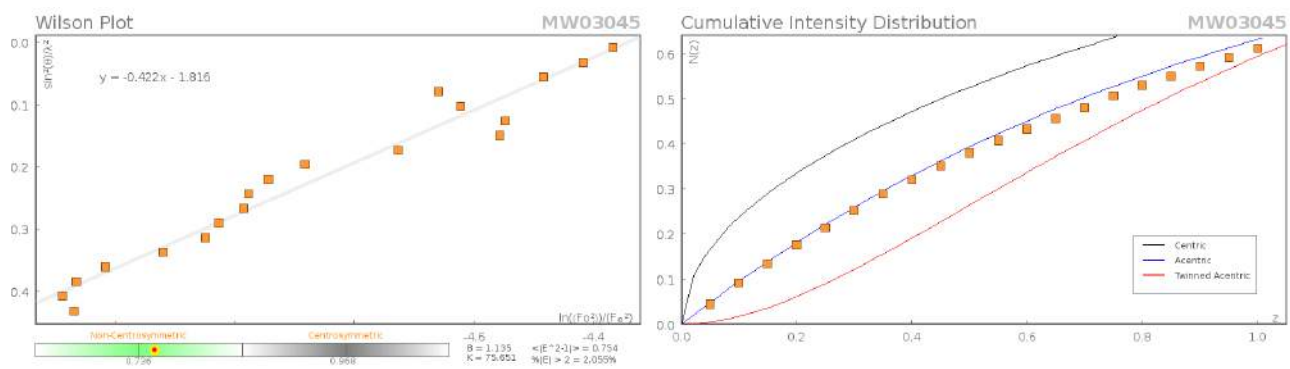

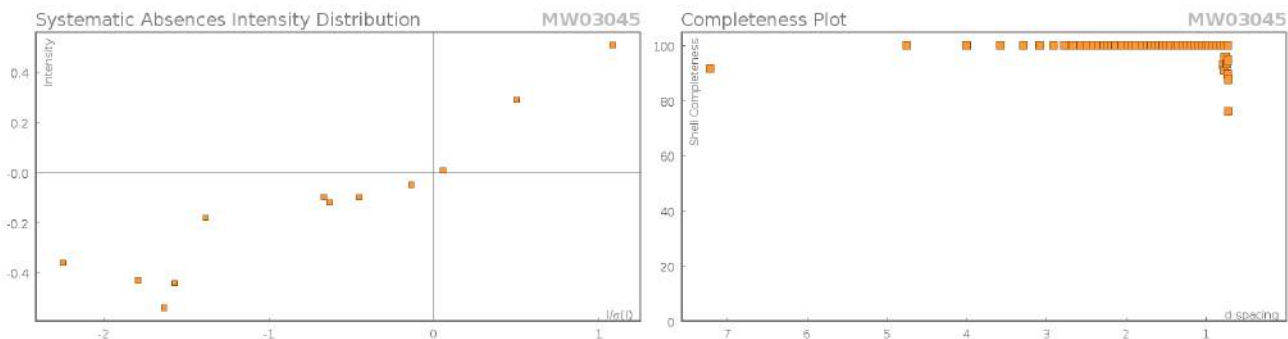

## Data Plots: Refinement and Data

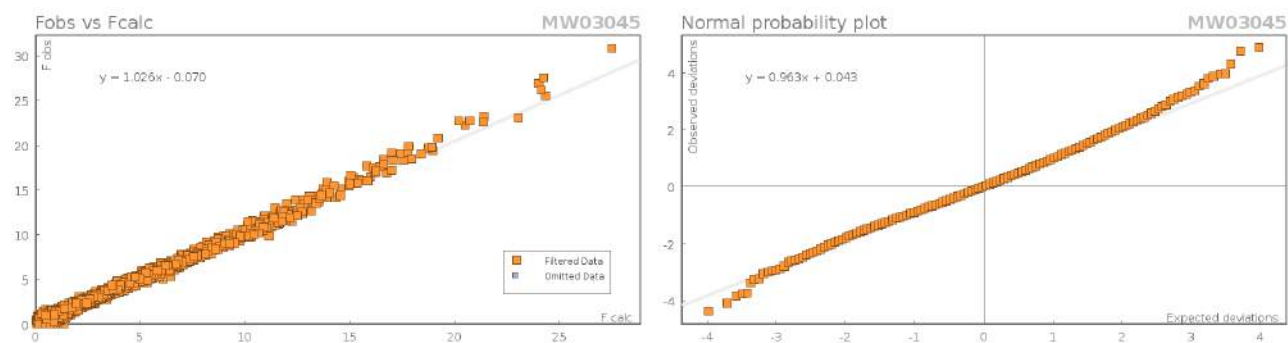

## Reflection Statistics

|                                         |                 |                                         |                 |
|-----------------------------------------|-----------------|-----------------------------------------|-----------------|
| Total reflections (after filtering)     | 22148           | Unique reflections                      | 14778           |
| Completeness                            | 0.914           | Mean $I/\sigma$                         | 10.93           |
| hkl <sub>sub</sub> >max</sub> collected | (19, 17, 23)    | hkl <sub>sub</sub> >min</sub> collected | (-19, -18, -23) |
| hkl <sub>max</sub> used                 | (17, 17, 23)    | hkl <sub>min</sub> used                 | (-19, -18, 0)   |
| Lim d <sub>max</sub> collected          | 100.0           | Lim d <sub>min</sub> collected          | 0.36            |
| d <sub>max</sub> used                   | 12.88           | d <sub>min</sub> used                   | 0.73            |
| Friedel pairs                           | 6633            | Friedel pairs merged                    | 0               |
| Inconsistent equivalents                | 2               | R <sub>int</sub>                        | 0.0328          |
| R <sub>sigma</sub>                      | 0.0676          | Intensity transformed                   | 0               |
| Omitted reflections                     | 0               | Omitted by user (OMIT hkl)              | 0               |
| Multiplicity                            | (20902, 620, 2) | Maximum multiplicity                    | 4               |
| Removed systematic absences             | 12              | Filtered off (Shel/OMIT)                | 0               |

## Images of the Crystal on the Diffractometer

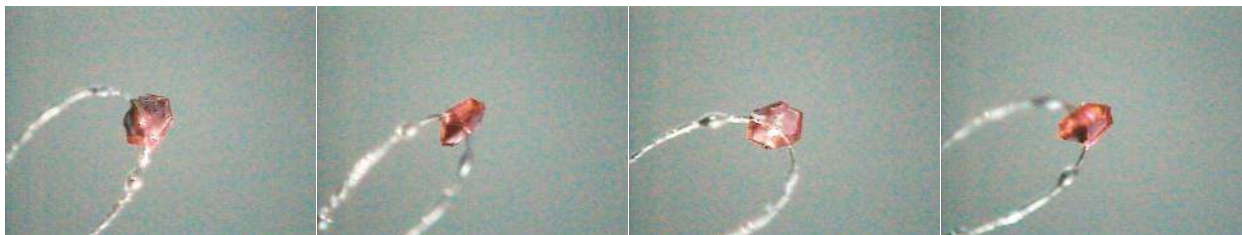

**Table S7:** Fractional Atomic Coordinates ( $\times 10^4$ ) and Equivalent Isotropic Displacement Parameters ( $\text{\AA}^2 \times 10^3$ ) for **MW03045**.  $U_{eq}$  is defined as  $1/3$  of the trace of the orthogonalised  $U_{ij}$ .

| Atom | x          | y         | z          | $U_{eq}$  |
|------|------------|-----------|------------|-----------|
| Co1  | 9157.2(4)  | 6608.7(5) | 4462.4(4)  | 12.76(13) |
| Co2  | 5726.5(5)  | 4656.6(4) | 649.4(4)   | 13.25(13) |
| Ca1  | 7590.4(7)  | 5412.6(7) | 2585.5(5)  | 12.63(18) |
| S2   | 10457.8(8) | 5666.3(8) | 3586.5(7)  | 13.6(2)   |
| S1   | 7741.0(9)  | 5054.3(9) | 4769.4(7)  | 16.0(2)   |
| S5   | 7471.4(9)  | 5570.9(9) | 380.8(7)   | 14.9(2)   |
| S6   | 6832.9(9)  | 2847.4(9) | 1739.2(7)  | 16.1(2)   |
| S4   | 4695.6(8)  | 5682.4(9) | 1717.3(7)  | 16.0(2)   |
| S3   | 7974.4(9)  | 8163.1(9) | 3149.0(7)  | 16.1(2)   |
| O4   | 11221(3)   | 4884(3)   | 3765(2)    | 19.6(7)   |
| O11  | 7267(3)    | 3732(3)   | 2257(2)    | 19.2(7)   |
| O7   | 5823(3)    | 5739(3)   | 2180(2)    | 19.3(7)   |
| O3   | 9385(3)    | 5344(3)   | 3129(2)    | 19.2(7)   |
| O10  | 8025(3)    | 4859(3)   | 85(2)      | 23.6(8)   |
| O9   | 7701(3)    | 5552(3)   | 1281.8(19) | 18.4(7)   |
| O12  | 6338(3)    | 2127(3)   | 2090(2)    | 22.0(7)   |
| O8   | 4138(3)    | 6608(3)   | 1636(2)    | 22.0(7)   |
| O2   | 7937(3)    | 4140(3)   | 5246(2)    | 26.3(8)   |
| O6   | 8415(3)    | 8874(3)   | 2754(2)    | 25.2(8)   |
| O1   | 7633(3)    | 4966(3)   | 3896(2)    | 20.7(7)   |
| O5   | 7705(3)    | 7182(3)   | 2743(2)    | 20.2(7)   |
| N3   | 10447(3)   | 6226(3)   | 4374(2)    | 15.1(8)   |
| N4   | 8676(3)    | 7930(3)   | 4082(3)    | 19.5(9)   |
| N8   | 6115(3)    | 3265(3)   | 859(3)     | 18.3(8)   |
| N2   | 8573(3)    | 5896(3)   | 5140(2)    | 17.6(8)   |
| N7   | 6251(3)    | 5477(3)   | -45(2)     | 18.0(8)   |
| N1   | 10081(3)   | 7282(3)   | 5569(2)    | 16.2(8)   |
| N5   | 4605(3)    | 4152(3)   | -454(3)    | 17.3(8)   |
| N6   | 4564(3)    | 5164(3)   | 874(2)     | 17.7(8)   |
| C48  | 7910(4)    | 2223(4)   | 1646(3)    | 18.4(10)  |
| C12  | 10752(3)   | 6511(4)   | 2918(3)    | 16.6(9)   |
| C30  | 4209(4)    | 4852(4)   | 2280(3)    | 18(1)     |
| C49  | 8129(4)    | 1244(4)   | 1910(3)    | 18.5(9)   |
| C3   | 6523(3)    | 5508(4)   | 4724(3)    | 18.8(10)  |
| C21  | 6802(4)    | 8713(4)   | 3120(3)    | 18.1(10)  |
| C1   | 9544(4)    | 7144(4)   | 6152(3)    | 19.3(10)  |
| C2   | 9045(4)    | 6101(4)   | 6043(3)    | 21.1(10)  |
| C11  | 11392(3)   | 6535(4)   | 5076(3)    | 17.0(9)   |
| C54  | 8536(4)    | 2747(4)   | 1321(4)    | 28.3(12)  |
| C50  | 9009(4)    | 796(4)    | 1873(3)    | 20.5(10)  |
| C42  | 8654(4)    | 8545(4)   | -174(3)    | 21.5(10)  |
| C45  | 8448(4)    | 7396(4)   | 831(3)     | 21.3(10)  |
| C24  | 4973(4)    | 9625(4)   | 3063(3)    | 25.6(11)  |
| C10  | 11093(4)   | 6757(4)   | 5829(3)    | 19(1)     |
| C33  | 3375(4)    | 3511(5)   | 3081(4)    | 30.6(13)  |
| C39  | 7881(3)    | 6758(3)   | 185(3)     | 15.3(9)   |
| C14  | 11351(4)   | 8085(4)   | 2615(3)    | 25.6(11)  |
| C51  | 9665(4)    | 1295(4)   | 1579(3)    | 24.6(11)  |
| C46  | 4930(4)    | 3142(4)   | -595(3)    | 26.9(12)  |
| C19  | 10155(4)   | 8347(4)   | 5348(3)    | 19.1(10)  |
| C17  | 11094(5)   | 6719(4)   | 1670(4)    | 32.5(13)  |
| C38  | 5740(4)    | 5224(4)   | -934(3)    | 21.3(10)  |
| C41  | 8059(4)    | 7918(4)   | -814(3)    | 27.6(12)  |
| C29  | 3539(4)    | 5026(4)   | 211(3)     | 22(1)     |
| C47  | 5416(4)    | 2568(4)   | 231(3)     | 23.5(11)  |
| C43  | 9082(4)    | 9509(4)   | -371(4)    | 30.0(12)  |
| C40  | 7685(4)    | 7026(4)   | -646(3)    | 27.0(12)  |

| Atom | x        | y        | z        | $U_{eq}$ |
|------|----------|----------|----------|----------|
| C22  | 6799(4)  | 9723(4)  | 3313(3)  | 23.4(10) |
| C26  | 4994(4)  | 8608(4)  | 2861(4)  | 27.5(12) |
| C18  | 10772(5) | 6128(4)  | 2172(3)  | 25.6(11) |
| C53  | 9406(5)  | 2287(5)  | 1291(4)  | 31.9(13) |
| C23  | 5888(4)  | 10160(4) | 3287(3)  | 27.2(12) |
| C27  | 5898(4)  | 8154(4)  | 2900(3)  | 22.5(10) |
| C13  | 11011(4) | 7500(4)  | 3130(3)  | 22.4(10) |
| C20  | 9128(4)  | 8733(4)  | 4698(3)  | 22.8(11) |
| C28  | 3605(4)  | 4157(4)  | -336(3)  | 24.0(11) |
| C36  | 3362(4)  | 5126(4)  | 2466(3)  | 24.7(11) |
| C15  | 11423(4) | 7695(4)  | 1895(4)  | 27.3(12) |
| C31  | 4653(4)  | 3905(4)  | 2500(4)  | 29.2(12) |
| C16  | 11826(5) | 8311(5)  | 1347(4)  | 40.2(16) |
| C32  | 4227(5)  | 3249(5)  | 2895(4)  | 33.8(13) |
| C35  | 2963(4)  | 4457(4)  | 2866(3)  | 28.5(12) |
| C44  | 8830(4)  | 8277(4)  | 642(3)   | 25.9(11) |
| C9   | 5812(4)  | 4856(5)  | 4833(4)  | 29.9(12) |
| C37  | 4623(4)  | 4899(4)  | -1090(3) | 25.8(11) |
| C25  | 3970(5)  | 10108(5) | 3012(4)  | 38.9(15) |
| C6   | 4590(4)  | 6210(6)  | 4573(4)  | 36.5(15) |
| C4   | 6266(4)  | 6496(5)  | 4531(4)  | 30.0(12) |
| C8   | 4847(4)  | 5212(5)  | 4751(4)  | 35.6(14) |
| C5   | 5301(5)  | 6836(5)  | 4454(4)  | 38.8(15) |
| C7   | 3536(5)  | 6583(8)  | 4487(5)  | 58(2)    |
| C52  | 10646(5) | 826(5)   | 1572(4)  | 33.3(13) |
| C34  | 2892(6)  | 2771(6)  | 3487(5)  | 46.8(17) |

**Table S8:** Anisotropic Displacement Parameters ( $\times 10^4$ ) **MW03045**. The anisotropic displacement factor exponent takes the form:  $-2\pi^2[h^2a^{*2} \times U_{11} + \dots + 2hka^* \times b^* \times U_{12}]$

| Atom | $U_{11}$ | $U_{22}$ | $U_{33}$ | $U_{23}$ | $U_{13}$ | $U_{12}$ |
|------|----------|----------|----------|----------|----------|----------|
| Co1  | 12.2(3)  | 12.9(3)  | 11.7(3)  | -0.2(2)  | 2.9(2)   | 0.6(2)   |
| Co2  | 14.5(3)  | 10.3(3)  | 13.0(3)  | -0.5(2)  | 3.1(2)   | -1.2(2)  |
| Ca1  | 13.1(4)  | 11.9(4)  | 11.5(4)  | -1.3(3)  | 3.1(3)   | -1.3(3)  |
| S2   | 12.3(5)  | 15.0(5)  | 13.9(5)  | 0.3(4)   | 5.3(4)   | 0.4(4)   |
| S1   | 15.9(5)  | 18.6(6)  | 14.4(5)  | 2.6(4)   | 6.6(4)   | 0.8(4)   |
| S5   | 18.0(5)  | 13.8(6)  | 13.3(5)  | 0.1(4)   | 6.4(4)   | -1.0(4)  |
| S6   | 18.2(5)  | 10.3(5)  | 17.7(6)  | -0.5(4)  | 4.3(4)   | 0.2(4)   |
| S4   | 12.7(5)  | 14.6(6)  | 20.2(5)  | -1.6(4)  | 5.8(4)   | 0.1(4)   |
| S3   | 18.6(5)  | 11.3(5)  | 15.0(5)  | -0.2(4)  | 2.4(4)   | 0.3(4)   |
| O4   | 18.7(16) | 20.1(19) | 22.2(17) | 3.2(14)  | 10.4(14) | 3.3(14)  |
| O11  | 21.4(17) | 14.0(17) | 19.5(17) | -2.9(14) | 4.9(14)  | -2.2(14) |
| O7   | 16.2(15) | 18.5(17) | 21.4(17) | -4.7(14) | 5.2(13)  | -2.3(14) |
| O3   | 17.9(16) | 20.3(18) | 18.3(16) | -4.8(14) | 5.7(13)  | -3.3(14) |
| O10  | 27.3(18) | 20(2)    | 23.5(18) | 1.1(15)  | 10.1(15) | 4.5(15)  |
| O9   | 22.4(16) | 18.7(18) | 13.7(15) | 1.3(14)  | 6.2(13)  | -2.5(14) |
| O12  | 25.1(18) | 16.2(18) | 24.6(19) | 1.4(14)  | 9.5(15)  | -0.9(14) |
| O8   | 18.6(16) | 17.3(17) | 29.3(19) | -2.0(16) | 8.3(14)  | 0.5(14)  |
| O2   | 32(2)    | 24(2)    | 26(2)    | 8.5(16)  | 14.7(17) | 4.0(16)  |
| O6   | 28.7(19) | 16.0(18) | 31(2)    | 4.0(15)  | 11.5(17) | -0.8(15) |
| O1   | 22.1(17) | 23.1(19) | 17.8(17) | 1.1(14)  | 8.6(14)  | -1.8(14) |
| O5   | 23.1(17) | 14.7(17) | 19.5(18) | -3.3(13) | 4.5(14)  | -0.7(14) |
| N3   | 12.7(17) | 20(2)    | 12.2(18) | 0.2(15)  | 4.2(15)  | 1.8(15)  |
| N4   | 21(2)    | 12(2)    | 16.3(19) | -1.6(16) | -3.6(16) | 2.3(16)  |
| N8   | 18.3(19) | 9.7(19)  | 19(2)    | -0.9(16) | -1.7(16) | 1.2(15)  |
| N2   | 15.0(18) | 26(2)    | 11.3(18) | 0.9(16)  | 4.3(15)  | -4.8(16) |
| N7   | 17.7(19) | 20(2)    | 13.4(18) | 0.5(16)  | 2.6(15)  | -5.5(16) |
| N1   | 14.6(18) | 17(2)    | 15.3(19) | 0.3(16)  | 3.4(15)  | 1.9(15)  |



| Atom | $U_{11}$ | $U_{22}$ | $U_{33}$ | $U_{23}$ | $U_{13}$ | $U_{12}$ |
|------|----------|----------|----------|----------|----------|----------|
| N5   | 21(2)    | 11.3(19) | 15.7(19) | -1.7(15) | 2.5(16)  | -5.2(16) |
| N6   | 12.5(18) | 21(2)    | 18(2)    | -5.6(17) | 4.2(15)  | -1.4(15) |
| C48  | 21(2)    | 14(2)    | 18(2)    | -0.3(18) | 4.2(19)  | 5.0(18)  |
| C12  | 14(2)    | 19(2)    | 16(2)    | 3.5(19)  | 5.3(17)  | 1.1(18)  |
| C30  | 17(2)    | 18(3)    | 19(2)    | -0.6(18) | 7.0(18)  | -1.7(18) |
| C49  | 23(2)    | 15(2)    | 14(2)    | -1.3(18) | 3.1(18)  | -1.7(19) |
| C3   | 13(2)    | 28(3)    | 17(2)    | -2(2)    | 6.9(17)  | 2.2(19)  |
| C21  | 22(2)    | 17(2)    | 11(2)    | 3.0(18)  | 2.2(18)  | 7.4(19)  |
| C1   | 19(2)    | 23(3)    | 16(2)    | -3.9(19) | 6.0(19)  | 1.0(19)  |
| C2   | 16(2)    | 32(3)    | 15(2)    | 1(2)     | 6.2(19)  | -1(2)    |
| C11  | 13(2)    | 21(2)    | 15(2)    | -0.2(19) | 4.2(17)  | 2.2(18)  |
| C54  | 33(3)    | 21(3)    | 34(3)    | 11(2)    | 17(2)    | 6(2)     |
| C50  | 24(2)    | 14(2)    | 18(2)    | 0.5(18)  | 2.1(19)  | 3.1(19)  |
| C42  | 16(2)    | 17(2)    | 31(3)    | 7(2)     | 10(2)    | -0.6(19) |
| C45  | 20(2)    | 23(3)    | 15(2)    | 4(2)     | 0.1(19)  | -1(2)    |
| C24  | 30(3)    | 26(3)    | 18(2)    | 2(2)     | 6(2)     | 10(2)    |
| C10  | 18(2)    | 21(3)    | 14(2)    | 2.0(19)  | 1.1(17)  | 1.9(19)  |
| C33  | 30(3)    | 35(3)    | 30(3)    | 2(2)     | 15(2)    | -6(2)    |
| C39  | 16(2)    | 13(2)    | 19(2)    | 2.1(17)  | 8.0(17)  | -1.1(17) |
| C14  | 26(3)    | 18(3)    | 26(3)    | 5(2)     | 3(2)     | -1(2)    |
| C51  | 24(3)    | 23(3)    | 24(3)    | 0(2)     | 6(2)     | 6(2)     |
| C46  | 31(3)    | 19(3)    | 22(3)    | -7(2)    | 0(2)     | 4(2)     |
| C19  | 20(2)    | 13(2)    | 20(2)    | -3.7(19) | 3.0(19)  | -2.2(18) |
| C17  | 53(4)    | 26(3)    | 29(3)    | 5(2)     | 29(3)    | 10(3)    |
| C38  | 27(2)    | 23(3)    | 12(2)    | -1.0(19) | 4.7(19)  | -5(2)    |
| C41  | 33(3)    | 29(3)    | 20(3)    | 6(2)     | 10(2)    | -5(2)    |
| C29  | 15(2)    | 20(2)    | 24(3)    | 2(2)     | 0.8(19)  | -2.6(19) |
| C47  | 25(3)    | 16(3)    | 22(3)    | -2(2)    | 1(2)     | -2(2)    |
| C43  | 29(3)    | 21(3)    | 38(3)    | 7(2)     | 11(2)    | -5(2)    |
| C40  | 36(3)    | 26(3)    | 20(3)    | -3(2)    | 12(2)    | -8(2)    |
| C22  | 24(2)    | 15(2)    | 25(3)    | -2(2)    | 3(2)     | -1(2)    |
| C26  | 23(3)    | 26(3)    | 31(3)    | 0(2)     | 7(2)     | -2(2)    |
| C18  | 41(3)    | 15(2)    | 24(3)    | -3(2)    | 16(2)    | 2(2)     |
| C53  | 32(3)    | 30(3)    | 39(3)    | 12(3)    | 20(3)    | 2(2)     |
| C23  | 35(3)    | 19(3)    | 23(3)    | -4(2)    | 5(2)     | 5(2)     |
| C27  | 24(2)    | 16(2)    | 23(3)    | 1(2)     | 4(2)     | 0(2)     |
| C13  | 28(3)    | 19(3)    | 18(2)    | -0.1(19) | 7(2)     | 1(2)     |
| C20  | 25(3)    | 16(2)    | 19(2)    | -5(2)    | -1(2)    | 3(2)     |
| C28  | 20(2)    | 25(3)    | 21(3)    | 0(2)     | 2(2)     | 1(2)     |
| C36  | 22(2)    | 28(3)    | 22(3)    | -2(2)    | 6(2)     | 1(2)     |
| C15  | 27(3)    | 27(3)    | 29(3)    | 12(2)    | 13(2)    | 5(2)     |
| C31  | 30(3)    | 23(3)    | 43(3)    | 4(2)     | 23(3)    | 4(2)     |
| C16  | 47(4)    | 35(4)    | 49(4)    | 18(3)    | 30(3)    | 7(3)     |
| C32  | 38(3)    | 26(3)    | 43(3)    | 8(3)     | 21(3)    | 5(3)     |
| C35  | 27(3)    | 36(3)    | 27(3)    | -6(2)    | 17(2)    | -4(2)    |
| C44  | 24(3)    | 23(3)    | 25(3)    | -1(2)    | 2(2)     | -5(2)    |
| C9   | 24(3)    | 35(3)    | 33(3)    | -2(2)    | 13(2)    | -3(2)    |
| C37  | 28(3)    | 23(3)    | 19(2)    | 4(2)     | 0(2)     | 0(2)     |
| C25  | 34(3)    | 43(4)    | 39(3)    | 2(3)     | 13(3)    | 14(3)    |
| C6   | 20(3)    | 62(4)    | 26(3)    | 0(3)     | 7(2)     | 9(3)     |
| C4   | 24(3)    | 32(3)    | 38(3)    | 10(3)    | 15(2)    | 3(2)     |
| C8   | 26(3)    | 49(4)    | 36(3)    | -6(3)    | 18(3)    | -14(3)   |
| C5   | 29(3)    | 44(4)    | 44(4)    | 8(3)     | 15(3)    | 13(3)    |
| C7   | 25(3)    | 99(7)    | 52(4)    | 3(5)     | 17(3)    | 10(4)    |
| C52  | 31(3)    | 32(3)    | 38(3)    | 5(3)     | 14(3)    | 9(3)     |
| C34  | 45(4)    | 52(4)    | 53(4)    | 14(4)    | 30(3)    | -7(3)    |

**Table S9:** Bond Lengths in Å for MW03045.

| Atom | Atom | Length/Å   | Atom | Atom | Length/Å  |
|------|------|------------|------|------|-----------|
| Co1  | Ca1  | 3.5305(11) | N6   | C29  | 1.463(6)  |
| Co1  | N3   | 1.928(4)   | C48  | C49  | 1.382(7)  |
| Co1  | N4   | 1.915(4)   | C48  | C54  | 1.393(7)  |
| Co1  | N2   | 1.914(4)   | C12  | C18  | 1.398(7)  |
| Co1  | N1   | 2.063(4)   | C12  | C13  | 1.382(7)  |
| Co2  | Ca1  | 3.5155(10) | C30  | C36  | 1.384(7)  |
| Co2  | N8   | 1.933(4)   | C30  | C31  | 1.397(7)  |
| Co2  | N7   | 1.961(4)   | C49  | C50  | 1.387(7)  |
| Co2  | N5   | 2.066(4)   | C3   | C9   | 1.385(7)  |
| Co2  | N6   | 1.925(4)   | C3   | C4   | 1.375(8)  |
| Ca1  | O11  | 2.318(3)   | C21  | C22  | 1.391(7)  |
| Ca1  | O7   | 2.329(3)   | C21  | C27  | 1.386(7)  |
| Ca1  | O3   | 2.313(3)   | C1   | C2   | 1.538(7)  |
| Ca1  | O9   | 2.325(3)   | C11  | C10  | 1.540(6)  |
| Ca1  | O1   | 2.323(3)   | C54  | C53  | 1.376(8)  |
| Ca1  | O5   | 2.379(4)   | C50  | C51  | 1.375(7)  |
| S2   | O4   | 1.438(3)   | C42  | C41  | 1.384(8)  |
| S2   | O3   | 1.464(3)   | C42  | C43  | 1.512(7)  |
| S2   | N3   | 1.560(4)   | C42  | C44  | 1.383(7)  |
| S2   | C12  | 1.772(5)   | C45  | C39  | 1.388(7)  |
| S1   | O2   | 1.441(4)   | C45  | C44  | 1.381(7)  |
| S1   | O1   | 1.465(4)   | C24  | C26  | 1.406(8)  |
| S1   | N2   | 1.566(4)   | C24  | C23  | 1.382(8)  |
| S1   | C3   | 1.774(5)   | C24  | C25  | 1.510(8)  |
| S5   | O10  | 1.436(4)   | C33  | C32  | 1.388(8)  |
| S5   | O9   | 1.467(3)   | C33  | C35  | 1.380(8)  |
| S5   | N7   | 1.579(4)   | C33  | C34  | 1.509(8)  |
| S5   | C39  | 1.762(5)   | C39  | C40  | 1.402(7)  |
| S6   | O11  | 1.467(4)   | C14  | C13  | 1.397(7)  |
| S6   | O12  | 1.445(4)   | C14  | C15  | 1.389(8)  |
| S6   | N8   | 1.571(4)   | C51  | C53  | 1.414(8)  |
| S6   | C48  | 1.776(5)   | C51  | C52  | 1.507(7)  |
| S4   | O7   | 1.468(3)   | C46  | C47  | 1.534(7)  |
| S4   | O8   | 1.439(4)   | C19  | C20  | 1.534(7)  |
| S4   | N6   | 1.562(4)   | C17  | C18  | 1.369(8)  |
| S4   | C30  | 1.771(5)   | C17  | C15  | 1.389(9)  |
| S3   | O6   | 1.438(4)   | C38  | C37  | 1.536(7)  |
| S3   | O5   | 1.467(4)   | C41  | C40  | 1.376(8)  |
| S3   | N4   | 1.567(4)   | C29  | C28  | 1.522(8)  |
| S3   | C21  | 1.774(5)   | C22  | C23  | 1.382(7)  |
| N3   | C11  | 1.470(6)   | C26  | C27  | 1.376(7)  |
| N4   | C20  | 1.475(6)   | C36  | C35  | 1.372(8)  |
| N8   | C47  | 1.480(6)   | C15  | C16  | 1.514(8)  |
| N2   | C2   | 1.472(6)   | C31  | C32  | 1.377(8)  |
| N7   | C38  | 1.467(6)   | C9   | C8   | 1.381(8)  |
| N1   | C1   | 1.478(6)   | C6   | C8   | 1.384(10) |
| N1   | C10  | 1.483(6)   | C6   | C5   | 1.369(9)  |
| N1   | C19  | 1.487(6)   | C6   | C7   | 1.504(8)  |
| N5   | C46  | 1.473(7)   | C4   | C5   | 1.376(8)  |
| N5   | C28  | 1.482(6)   |      |      |           |
| N5   | C37  | 1.493(6)   |      |      |           |

**Table S10:** Bond Angles in ° for **MW03045**.

| Atom | Atom | Atom | Angle/°   | Atom | Atom | Atom | Angle/°   |
|------|------|------|-----------|------|------|------|-----------|
| N3   | Co1  | Ca1  | 94.34(12) | N3   | Co1  | N1   | 85.30(16) |

| Atom | Atom | Atom | Angle/°    | Atom | Atom | Atom | Angle/°  |
|------|------|------|------------|------|------|------|----------|
| N4   | Co1  | Ca1  | 95.07(12)  | O7   | S4   | C30  | 106.6(2) |
| N4   | Co1  | N3   | 115.59(18) | O8   | S4   | O7   | 115.7(2) |
| N4   | Co1  | N1   | 85.98(17)  | O8   | S4   | N6   | 115.0(2) |
| N2   | Co1  | Ca1  | 94.57(12)  | O8   | S4   | C30  | 106.7(2) |
| N2   | Co1  | N3   | 122.81(18) | N6   | S4   | C30  | 107.6(2) |
| N2   | Co1  | N4   | 119.65(19) | O6   | S3   | O5   | 116.2(2) |
| N2   | Co1  | N1   | 84.81(16)  | O6   | S3   | N4   | 114.2(2) |
| N1   | Co1  | Ca1  | 178.95(12) | O6   | S3   | C21  | 105.5(2) |
| N8   | Co2  | Ca1  | 92.59(12)  | O5   | S3   | N4   | 105.1(2) |
| N8   | Co2  | N7   | 120.67(18) | O5   | S3   | C21  | 107.0(2) |
| N8   | Co2  | N5   | 85.32(16)  | N4   | S3   | C21  | 108.5(2) |
| N7   | Co2  | Ca1  | 96.35(11)  | S6   | O11  | Ca1  | 157.9(2) |
| N7   | Co2  | N5   | 86.78(16)  | S4   | O7   | Ca1  | 160.5(2) |
| N5   | Co2  | Ca1  | 176.83(11) | S2   | O3   | Ca1  | 158.5(2) |
| N6   | Co2  | Ca1  | 94.55(12)  | S5   | O9   | Ca1  | 164.4(2) |
| N6   | Co2  | N8   | 119.87(18) | S1   | O1   | Ca1  | 160.1(2) |
| N6   | Co2  | N7   | 117.65(18) | S3   | O5   | Ca1  | 159.6(2) |
| N6   | Co2  | N5   | 84.45(17)  | S2   | N3   | Co1  | 121.0(2) |
| O11  | Ca1  | O7   | 91.35(12)  | C11  | N3   | Co1  | 115.4(3) |
| O11  | Ca1  | O9   | 85.27(12)  | C11  | N3   | S2   | 123.6(3) |
| O11  | Ca1  | O1   | 85.48(13)  | S3   | N4   | Co1  | 122.5(2) |
| O11  | Ca1  | O5   | 171.65(13) | C20  | N4   | Co1  | 115.2(3) |
| O7   | Ca1  | O5   | 82.27(12)  | C20  | N4   | S3   | 121.8(3) |
| O3   | Ca1  | O11  | 98.04(13)  | S6   | N8   | Co2  | 123.6(2) |
| O3   | Ca1  | O7   | 169.82(13) | C47  | N8   | Co2  | 114.1(3) |
| O3   | Ca1  | O9   | 86.41(12)  | C47  | N8   | S6   | 119.1(3) |
| O3   | Ca1  | O1   | 88.30(12)  | S1   | N2   | Co1  | 121.8(2) |
| O3   | Ca1  | O5   | 88.73(12)  | C2   | N2   | Co1  | 115.8(3) |
| O9   | Ca1  | O7   | 98.34(12)  | C2   | N2   | S1   | 122.0(3) |
| O9   | Ca1  | O5   | 90.30(12)  | S5   | N7   | Co2  | 110.1(2) |
| O1   | Ca1  | O7   | 88.53(12)  | C38  | N7   | Co2  | 111.5(3) |
| O1   | Ca1  | O9   | 168.60(13) | C38  | N7   | S5   | 121.0(3) |
| O1   | Ca1  | O5   | 99.67(13)  | C1   | N1   | Co1  | 106.2(3) |
| O4   | S2   | O3   | 114.9(2)   | C1   | N1   | C10  | 113.8(4) |
| O4   | S2   | N3   | 114.4(2)   | C1   | N1   | C19  | 113.4(4) |
| O4   | S2   | C12  | 105.6(2)   | C10  | N1   | Co1  | 105.1(3) |
| O3   | S2   | N3   | 105.5(2)   | C10  | N1   | C19  | 112.3(4) |
| O3   | S2   | C12  | 106.0(2)   | C19  | N1   | Co1  | 105.0(3) |
| N3   | S2   | C12  | 110.2(2)   | C46  | N5   | Co2  | 106.3(3) |
| O2   | S1   | O1   | 116.4(2)   | C46  | N5   | C28  | 113.0(4) |
| O2   | S1   | N2   | 115.2(2)   | C46  | N5   | C37  | 113.5(4) |
| O2   | S1   | C3   | 106.6(2)   | C28  | N5   | Co2  | 106.9(3) |
| O1   | S1   | N2   | 104.4(2)   | C28  | N5   | C37  | 112.2(4) |
| O1   | S1   | C3   | 105.1(2)   | C37  | N5   | Co2  | 104.1(3) |
| N2   | S1   | C3   | 108.5(2)   | S4   | N6   | Co2  | 122.4(2) |
| O10  | S5   | O9   | 115.9(2)   | C29  | N6   | Co2  | 116.2(3) |
| O10  | S5   | N7   | 114.2(2)   | C29  | N6   | S4   | 121.4(3) |
| O10  | S5   | C39  | 105.7(2)   | C49  | C48  | S6   | 120.2(4) |
| O9   | S5   | N7   | 104.8(2)   | C49  | C48  | C54  | 121.1(5) |
| O9   | S5   | C39  | 105.3(2)   | C54  | C48  | S6   | 118.7(4) |
| N7   | S5   | C39  | 110.6(2)   | C18  | C12  | S2   | 117.4(4) |
| O11  | S6   | N8   | 105.5(2)   | C13  | C12  | S2   | 122.5(4) |
| O11  | S6   | C48  | 105.5(2)   | C13  | C12  | C18  | 120.0(5) |
| O12  | S6   | O11  | 115.7(2)   | C36  | C30  | S4   | 120.0(4) |
| O12  | S6   | N8   | 114.4(2)   | C36  | C30  | C31  | 120.2(5) |
| O12  | S6   | C48  | 106.2(2)   | C31  | C30  | S4   | 119.7(4) |
| N8   | S6   | C48  | 109.0(2)   | C48  | C49  | C50  | 118.8(5) |
| O7   | S4   | N6   | 104.6(2)   | C9   | C3   | S1   | 120.0(4) |

| Atom | Atom | Atom | Angle/°  | Atom | Atom | Atom | Angle/°  |
|------|------|------|----------|------|------|------|----------|
| C4   | C3   | S1   | 119.7(4) | N7   | C38  | C37  | 107.8(4) |
| C4   | C3   | C9   | 120.2(5) | C40  | C41  | C42  | 121.0(5) |
| C22  | C21  | S3   | 118.8(4) | N6   | C29  | C28  | 108.2(4) |
| C27  | C21  | S3   | 120.9(4) | N8   | C47  | C46  | 107.6(4) |
| C27  | C21  | C22  | 120.3(5) | C41  | C40  | C39  | 119.7(5) |
| N1   | C1   | C2   | 110.6(4) | C23  | C22  | C21  | 119.2(5) |
| N2   | C2   | C1   | 107.3(4) | C27  | C26  | C24  | 121.3(5) |
| N3   | C11  | C10  | 107.9(4) | C17  | C18  | C12  | 120.0(5) |
| C53  | C54  | C48  | 119.1(5) | C54  | C53  | C51  | 121.0(5) |
| C51  | C50  | C49  | 122.0(5) | C24  | C23  | C22  | 121.9(5) |
| C41  | C42  | C43  | 120.1(5) | C26  | C27  | C21  | 119.6(5) |
| C44  | C42  | C41  | 118.6(5) | C12  | C13  | C14  | 118.9(5) |
| C44  | C42  | C43  | 121.3(5) | N4   | C20  | C19  | 107.9(4) |
| C44  | C45  | C39  | 119.0(5) | N5   | C28  | C29  | 111.8(4) |
| C26  | C24  | C25  | 120.4(5) | C35  | C36  | C30  | 119.3(5) |
| C23  | C24  | C26  | 117.7(5) | C14  | C15  | C17  | 118.3(5) |
| C23  | C24  | C25  | 121.9(5) | C14  | C15  | C16  | 121.8(6) |
| N1   | C10  | C11  | 111.5(4) | C17  | C15  | C16  | 119.8(5) |
| C32  | C33  | C34  | 120.9(6) | C32  | C31  | C30  | 118.9(5) |
| C35  | C33  | C32  | 118.2(5) | C31  | C32  | C33  | 121.4(6) |
| C35  | C33  | C34  | 120.8(5) | C36  | C35  | C33  | 121.8(5) |
| C45  | C39  | S5   | 121.7(4) | C45  | C44  | C42  | 121.8(5) |
| C45  | C39  | C40  | 119.8(4) | C8   | C9   | C3   | 119.1(6) |
| C40  | C39  | S5   | 118.4(4) | N5   | C37  | C38  | 111.1(4) |
| C15  | C14  | C13  | 121.3(5) | C8   | C6   | C7   | 120.1(7) |
| C50  | C51  | C53  | 118.0(5) | C5   | C6   | C8   | 118.8(5) |
| C50  | C51  | C52  | 122.2(5) | C5   | C6   | C7   | 121.1(7) |
| C53  | C51  | C52  | 119.8(5) | C3   | C4   | C5   | 119.7(5) |
| N5   | C46  | C47  | 111.0(4) | C9   | C8   | C6   | 120.9(5) |
| N1   | C19  | C20  | 112.0(4) | C6   | C5   | C4   | 121.2(6) |
| C18  | C17  | C15  | 121.1(5) |      |      |      |          |

**Table S11:** Hydrogen Fractional Atomic Coordinates ( $\times 10^4$ ) and Equivalent Isotropic Displacement Parameters ( $\text{\AA}^2 \times 10^3$ ) for **MW03045**.  $U_{eq}$  is defined as 1/3 of the trace of the orthogonalised  $U_{ij}$ .

| Atom | x     | y    | z     | $U_{eq}$ |
|------|-------|------|-------|----------|
| H49  | 7685  | 884  | 2114  | 22       |
| H1A  | 9000  | 7663 | 6045  | 23       |
| H1B  | 10047 | 7224 | 6734  | 23       |
| H2A  | 9578  | 5590 | 6327  | 25       |
| H2B  | 8509  | 6085 | 6289  | 25       |
| H11A | 11691 | 7140 | 4924  | 20       |
| H11B | 11918 | 5994 | 5217  | 20       |
| H54  | 8366  | 3412 | 1123  | 34       |
| H50  | 9164  | 123  | 2057  | 25       |
| H45  | 8572  | 7229 | 1394  | 26       |
| H10A | 11053 | 6121 | 6109  | 23       |
| H10B | 11639 | 7176 | 6237  | 23       |
| H14  | 11536 | 8764 | 2760  | 31       |
| H46A | 5441  | 3196 | -864  | 32       |
| H46B | 4320  | 2769 | -977  | 32       |
| H19A | 10709 | 8415 | 5124  | 23       |
| H19B | 10351 | 8762 | 5859  | 23       |
| H17  | 11092 | 6456 | 1159  | 39       |
| H38A | 6117  | 4674 | -1079 | 26       |
| H38B | 5734  | 5813 | -1283 | 26       |
| H41  | 7908  | 8106 | -1378 | 33       |

| Atom | x     | y     | z     | $U_{eq}$ |
|------|-------|-------|-------|----------|
| H29A | 3325  | 5643  | -128  | 26       |
| H29B | 3019  | 4878  | 458   | 26       |
| H47A | 4867  | 2322  | 416   | 28       |
| H47B | 5813  | 1985  | 158   | 28       |
| H43A | 9810  | 9412  | -295  | 45       |
| H43B | 9035  | 10039 | 5     | 45       |
| H43C | 8679  | 9701  | -952  | 45       |
| H40  | 7295  | 6593  | -1090 | 32       |
| H22  | 7417  | 10108 | 3461  | 28       |
| H26  | 4372  | 8227  | 2695  | 33       |
| H18  | 10562 | 5457  | 2014  | 31       |
| H53  | 9839  | 2642  | 1073  | 38       |
| H23  | 5891  | 10847 | 3427  | 33       |
| H27  | 5903  | 7462  | 2776  | 27       |
| H13  | 10958 | 7777  | 3618  | 27       |
| H20A | 8646  | 8914  | 4973  | 27       |
| H20B | 9254  | 9336  | 4417  | 27       |
| H28A | 3527  | 3519  | -75   | 29       |
| H28B | 3026  | 4207  | -889  | 29       |
| H36  | 3061  | 5771  | 2318  | 30       |
| H31  | 5239  | 3717  | 2379  | 35       |
| H16A | 11321 | 8295  | 769   | 60       |
| H16B | 12488 | 8034  | 1371  | 60       |
| H16C | 11929 | 9005  | 1546  | 60       |
| H32  | 4524  | 2602  | 3043  | 41       |
| H35  | 2387  | 4650  | 2999  | 34       |
| H44  | 9224  | 8711  | 1084  | 31       |
| H9   | 5986  | 4172  | 4963  | 36       |
| H37A | 4209  | 5493  | -1067 | 31       |
| H37B | 4303  | 4603  | -1655 | 31       |
| H25A | 3602  | 10371 | 2447  | 58       |
| H25B | 4123  | 10657 | 3417  | 58       |
| H25C | 3535  | 9610  | 3139  | 58       |
| H4   | 6752  | 6941  | 4452  | 36       |
| H8   | 4353  | 4767  | 4818  | 43       |
| H5   | 5124  | 7517  | 4316  | 47       |
| H7A  | 3078  | 6012  | 4449  | 87       |
| H7B  | 3241  | 6992  | 3981  | 87       |
| H7C  | 3600  | 6988  | 4977  | 87       |
| H52A | 11248 | 1125  | 2015  | 50       |
| H52B | 10694 | 944   | 1029  | 50       |
| H52C | 10633 | 104   | 1668  | 50       |
| H34A | 2323  | 2418  | 3053  | 70       |
| H34B | 2622  | 3128  | 3856  | 70       |
| H34C | 3419  | 2286  | 3813  | 70       |

Submitted by: **Christian Wallen**  
Emory University

Solved by:

Sample ID: **CMW-030086SRTS**

## Crystal Data and Experimental

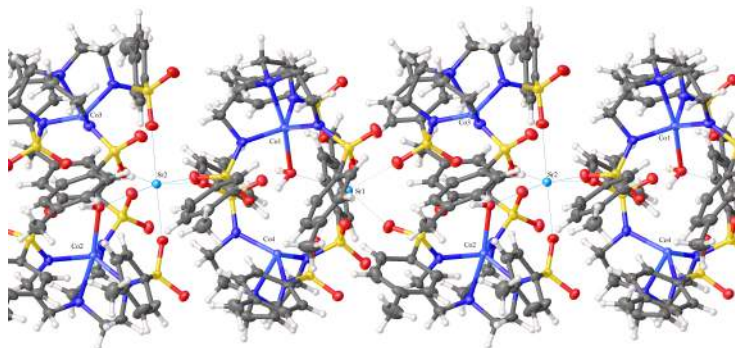

**Experimental.** Single violet plate-shaped crystals of (CMW-03-086SRTS) were recrystallised from a mixture of  $\text{CH}_2\text{Cl}_2$  and methanol by vapor diffusion. A suitable crystal (0.92×0.28×0.10 mm) was selected and mounted on a loop with paratone oil on a Bruker APEX-II CCD diffractometer. The crystal was cooled to  $T = 100(2)$  K during data collection. The structure was solved with the **ShelXT** (Sheldrick, 2015) structure solution program using combined Patterson and dual-space recycling methods and by using **Olex2** (Dolomanov et al., 2009) as the graphical interface. The crystal structure was refined with version of **ShelXL** (Sheldrick, 2008) using Least Squares minimisation.

**Crystal Data.**  $\text{C}_{108}\text{H}_{138}\text{Co}_4\text{N}_{16}\text{O}_{27}\text{S}_{12}\text{Sr}_2$ ,  $M_r = 2888.02$ , monoclinic,  $P2_1/c$  (No. 14),  $a = 29.583(7)$  Å,  $b = 16.185(4)$  Å,  $c = 25.822(6)$  Å,  $\beta = 95.585(4)^\circ$ ,  $\alpha = \gamma = 90^\circ$ ,  $V = 12305(5)$  Å<sup>3</sup>,  $T = 100(2)$  K,  $Z = 4$ ,  $Z' = 1$ ,  $\mu(\text{MoK}\alpha) = 1.669$ , 97100 reflections measured, 32412 unique ( $R_{\text{int}} = 0.0842$ ) which were used in all calculations. The final  $wR_2$  was 0.1594 (all data) and  $R_1$  was 0.0630 ( $I > 2\sigma(I)$ ).

| Compound                              | CMW-03-086SRTS                                                                              |
|---------------------------------------|---------------------------------------------------------------------------------------------|
| Formula                               | $\text{C}_{108}\text{H}_{138}\text{Co}_4\text{N}_{16}\text{O}_{27}\text{S}_{12}\text{Sr}_2$ |
| $D_{\text{calc.}} / \text{g cm}^{-3}$ | 1.559                                                                                       |
| $\mu / \text{mm}^{-1}$                | 1.669                                                                                       |
| Formula Weight                        | 2888.02                                                                                     |
| Colour                                | violet                                                                                      |
| Shape                                 | plate                                                                                       |
| Max Size/mm                           | 0.92                                                                                        |
| Mid Size/mm                           | 0.28                                                                                        |
| Min Size/mm                           | 0.10                                                                                        |
| $T/\text{K}$                          | 100(2)                                                                                      |
| Crystal System                        | monoclinic                                                                                  |
| Space Group                           | $P2_1/c$                                                                                    |
| $a/\text{Å}$                          | 29.583(7)                                                                                   |
| $b/\text{Å}$                          | 16.185(4)                                                                                   |
| $c/\text{Å}$                          | 25.822(6)                                                                                   |
| $\alpha/^\circ$                       | 90                                                                                          |
| $\beta/^\circ$                        | 95.585(4)                                                                                   |
| $\gamma/^\circ$                       | 90                                                                                          |
| $V/\text{Å}^3$                        | 12305(5)                                                                                    |
| $Z$                                   | 4                                                                                           |
| $Z'$                                  | 1                                                                                           |
| $\Theta_{\text{min}}/^\circ$          | 0.692                                                                                       |
| $\Theta_{\text{max}}/^\circ$          | 29.603                                                                                      |
| Measured Refl.                        | 97100                                                                                       |
| Independent Refl.                     | 32412                                                                                       |
| $I > 2\sigma(I)$                      | 20137                                                                                       |
| $R_{\text{int}}$                      | 0.0842                                                                                      |
| Parameters                            | 1537                                                                                        |
| Restraints                            | 10                                                                                          |
| Largest Peak                          | 1.516                                                                                       |
| Deepest Hole                          | -0.936                                                                                      |
| GooF                                  | 1.033                                                                                       |
| $wR_2$ (all data)                     | 0.1594                                                                                      |
| $wR_2$                                | 0.1350                                                                                      |
| $R_1$ (all data)                      | 0.1207                                                                                      |
| $R_1$                                 | 0.0630                                                                                      |
| CCDC #                                | 1434441                                                                                     |

## Structure Quality Indicators

### Reflections:

### Refinement:

A violet plate-shaped crystal with dimensions 0.92×0.28×0.10 mm was mounted on a loop with paratone oil. X-ray diffraction data were collected using a Bruker APEX-II CCD diffractometer equipped with an Oxford Cryosystems low-temperature apparatus operating at  $T = 100(2)$  K.

Data were measured using  $\omega$  scans with MoK $\alpha$  radiation (fine-focus sealed tube, 45 kV, 35 mA). The total number of runs and images was based on the strategy calculation from the program **APEX2** (Bruker, 2014). The maximum resolution achieved was  $\Theta = 29.603^\circ$ .

Unit cell indexing was performed by using the **APEX2** (Bruker) software and refined using **SAINT** (Bruker, V8.34A, 2013) on 9882 reflections, 10% of the observed reflections. Data reduction, scaling and absorption corrections were performed using **SAINT** (Bruker, V8.34A, 2013) and **SADABS-2014/2** (Bruker, 2014) was used for absorption correction.  $wR_2(\text{int})$  was 0.1695 before and 0.0606 after correction. The ratio of minimum to maximum transmission is 0.4684. The  $\lambda/2$  correction factor is Not present. software which corrects for Lorentz polarisation. The final completeness is 100.00 out to 29.603 in  $\Theta$ . The absorption coefficient ( $\mu$ ) of this material is 1.669 mm $^{-1}$  and the minimum and maximum transmissions are 0.3494 and 0.7459.

The structure was solved in the space group P1 with the **ShelXT** (Sheldrick, 2015) structure solution program using combined Patterson and dual-space recycling methods. The space group P2 $_1$ /c (# 14) was determined by **ShelXT** (Sheldrick, 2015) structure solution program. The crystal structure was refined by Least Squares using version 2014/7 of **ShelXL** (Sheldrick, 2008). All non-hydrogen atoms were refined anisotropically. Hydrogen atom positions were calculated geometrically and refined using the riding model.

There are two independent molecules in the asymmetric unit.

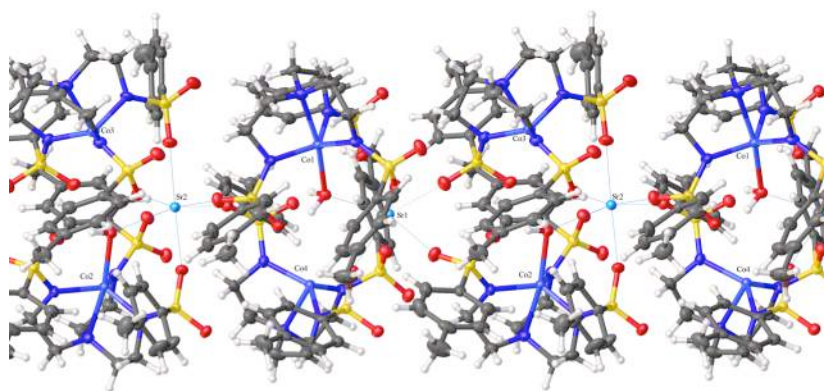

**Figure S12:**

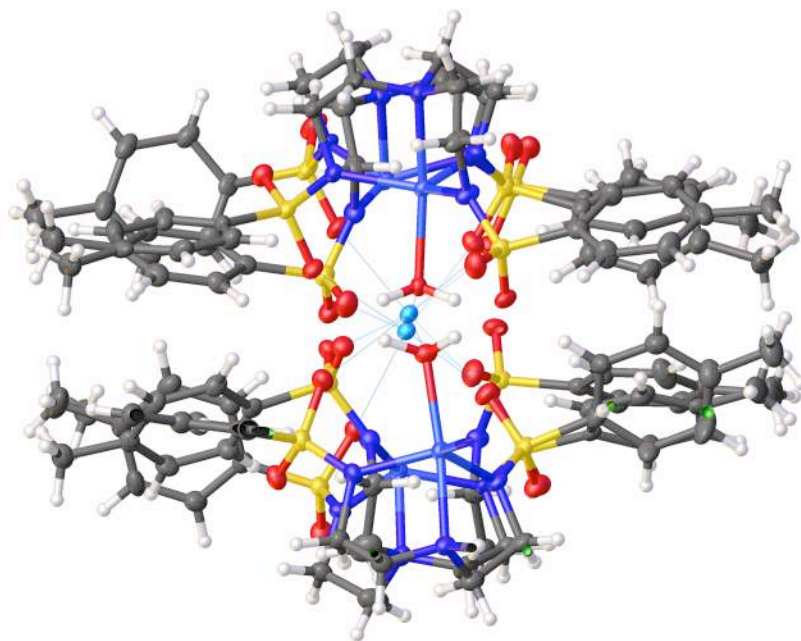

Figure S13:

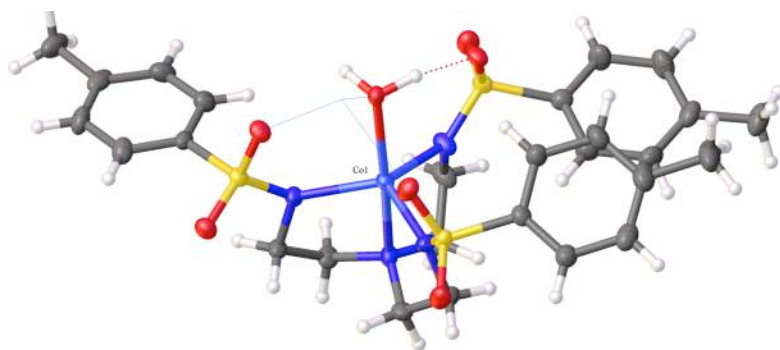

Figure S14:

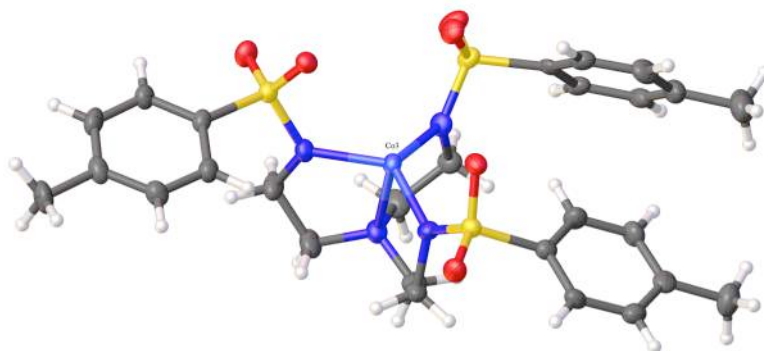

Figure S15:



## Data Plots: Diffraction Data

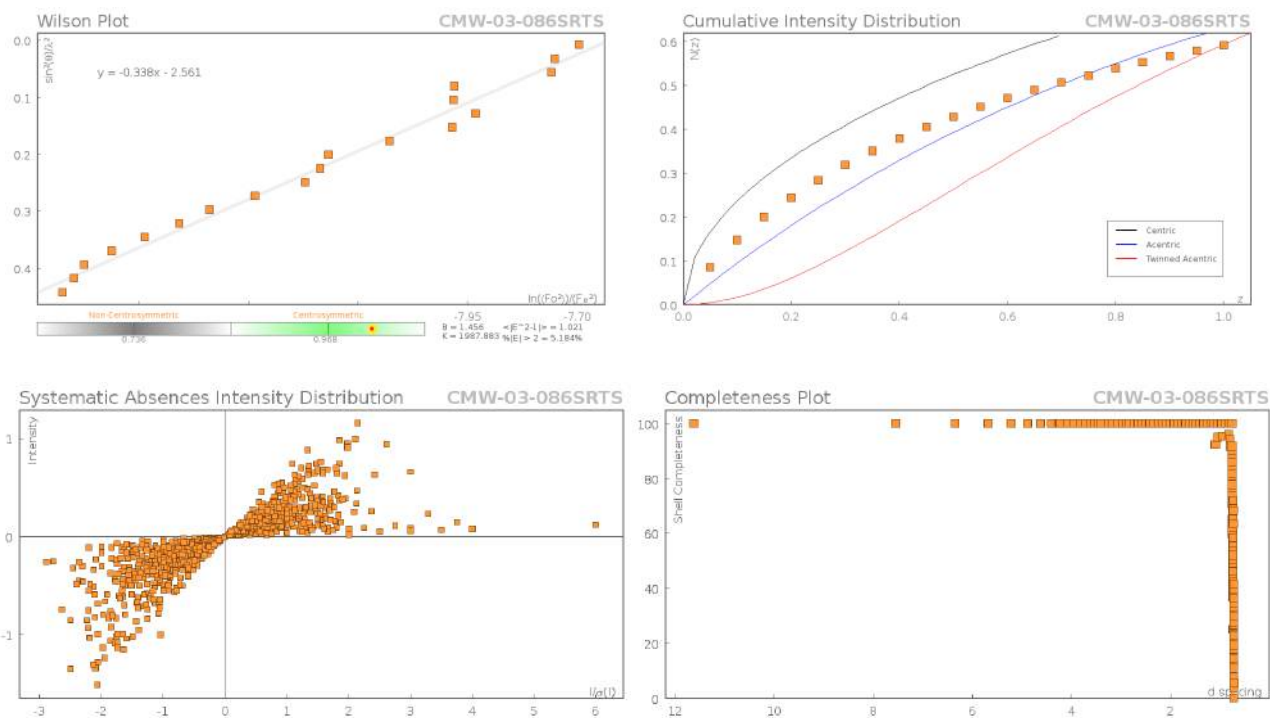

## Data Plots: Refinement and Data

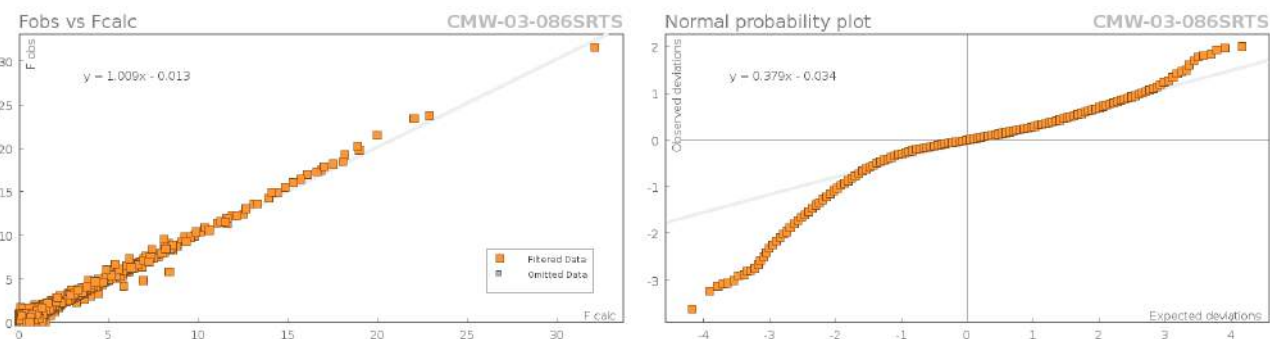

## Reflection Statistics

|                                     |                    |                                |                 |
|-------------------------------------|--------------------|--------------------------------|-----------------|
| Total reflections (after filtering) | 98878              | Unique reflections             | 32412           |
| Completeness                        | 0.936              | Mean $I/\sigma$                | 6.7             |
| hkls <sub>max</sub> >collected      | (38, 22, 35)       | hkls <sub>min</sub> >collected | (-41, -22, -31) |
| hkls <sub>max</sub> used            | (40, 22, 35)       | hkls <sub>min</sub> used       | (-41, 0, 0)     |
| Lim $d_{max}$ collected             | 100.0              | Lim $d_{min}$ collected        | 0.36            |
| $d_{max}$ used                      | 29.44              | $d_{min}$ used                 | 0.72            |
| Friedel pairs                       | 24046              | Friedel pairs merged           | 1               |
| Inconsistent equivalents            | 0                  | $R_{int}$                      | 0.0842          |
| $R_{sigma}$                         | 0.1104             | Intensity transformed          | 0               |
| Omitted reflections                 | 0                  | Omitted by user (OMIT hkl)     | 0               |
| Multiplicity                        | (68410, 15135, 66) | Maximum multiplicity           | 9               |
| Removed systematic absences         | 1778               | Filtered off (Shel/OMIT)       | 0               |

## Images of the Crystal on the Diffractometer

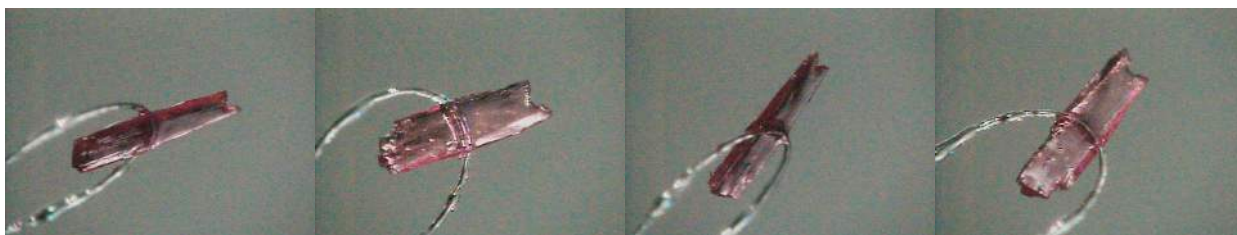

**Table S12:** Fractional Atomic Coordinates ( $\times 10^4$ ) and Equivalent Isotropic Displacement Parameters ( $\text{\AA}^2 \times 10^3$ ) for **CMW-03-086SRTS**.  $U_{eq}$  is defined as 1/3 of the trace of the orthogonalised  $U_{ij}$ .

| Atom | x          | y          | z          | $U_{eq}$  |
|------|------------|------------|------------|-----------|
| Co1  | 3090.1(2)  | 1499.8(3)  | 1633.4(2)  | 18.14(13) |
| S3   | 2142.3(4)  | 747.6(6)   | 1070.5(4)  | 19.6(2)   |
| S1   | 3624.6(4)  | -148.1(6)  | 2053.4(4)  | 20.9(2)   |
| S2   | 3347.5(4)  | 3010.6(6)  | 2451.5(4)  | 21.0(2)   |
| O2   | 3817.9(10) | -860.2(17) | 1816.0(12) | 30.2(7)   |
| O1   | 2677.0(8)  | 1364.1(15) | 2276.9(10) | 18.9(6)   |
| O4   | 3178.1(10) | 2430.5(17) | 2813.2(10) | 23.8(7)   |
| O5   | 3119.3(11) | 3801.1(17) | 2430.4(12) | 29.4(7)   |
| O3   | 3193.8(10) | -272.1(17) | 2266.2(12) | 25.5(7)   |
| O6   | 2076.3(10) | 537.8(17)  | 1607.8(10) | 22.8(7)   |
| O7   | 2125.2(10) | 60.0(16)   | 712.5(11)  | 24.5(7)   |
| N1   | 3563.0(12) | 616(2)     | 1678.2(13) | 22.7(8)   |
| N2   | 3439.3(12) | 1885(2)    | 966.9(13)  | 22.6(8)   |
| N3   | 3348.2(13) | 2594(2)    | 1907.9(13) | 24.8(8)   |
| N4   | 2584.7(12) | 1286(2)    | 1066.6(13) | 21.0(8)   |
| C22  | 1332.0(15) | 1093(3)    | 499.0(17)  | 28.4(10)  |
| C23  | 968.2(16)  | 1603(3)    | 329.7(18)  | 31.9(11)  |
| C8   | 3931.6(15) | 769(3)     | 1348.4(17) | 28.2(10)  |
| C2   | 3884.4(16) | 670(3)     | 2958.0(17) | 27.2(10)  |
| C14  | 4416.7(17) | 3992(3)    | 3311.2(18) | 34.0(12)  |
| C3   | 4194.9(17) | 894(3)     | 3375.9(18) | 35.4(12)  |
| C20  | 2706.5(15) | 1428(3)    | 529.8(16)  | 24.8(10)  |
| C13  | 3995.2(17) | 3899(3)    | 3036.8(18) | 32.1(11)  |
| C9   | 3719.9(16) | 1172(3)    | 847.2(16)  | 27.5(10)  |
| C1   | 4016.7(15) | 117(2)     | 2591.1(16) | 20.5(9)   |
| C16  | 4677.1(17) | 2779(3)    | 2923.4(18) | 34.4(12)  |
| C12  | 3908.6(15) | 3221(2)    | 2713.9(16) | 22.3(9)   |
| C26  | 1679.3(16) | 2228(3)    | 981.4(17)  | 27.6(10)  |
| C10  | 3715.8(16) | 2624(3)    | 1118.3(17) | 29.7(11)  |
| C15  | 4765.2(16) | 3430(3)    | 3266.4(18) | 29.8(11)  |
| C21  | 1678.8(14) | 1397(3)    | 833.3(16)  | 22.1(9)   |
| C17  | 4256.4(16) | 2667(3)    | 2654.5(18) | 29.4(11)  |
| C4   | 4630.1(18) | 573(3)     | 3432.9(18) | 36.2(12)  |
| C18  | 5213.9(16) | 3517(3)    | 3587(2)    | 41.5(13)  |
| C11  | 3491.9(18) | 3146(3)    | 1493.3(17) | 30.5(11)  |
| C24  | 953.9(16)  | 2416(3)    | 480.9(18)  | 32.0(11)  |
| C6   | 4447.0(16) | -216(3)    | 2644.9(17) | 27.6(10)  |
| C5   | 4751.2(17) | 11(3)      | 3065.7(18) | 33.5(11)  |
| C7   | 4957.1(18) | 819(4)     | 3890.5(19) | 52.0(16)  |
| C19  | 3075.5(15) | 2073(3)    | 548.9(16)  | 25.9(10)  |
| C25  | 1317.9(17) | 2725(3)    | 804.0(17)  | 32.0(11)  |
| C27  | 552.6(17)  | 2964(3)    | 316(2)     | 42.4(14)  |
| Co2  | 2166.3(2)  | 6453.6(3)  | 3502.6(2)  | 18.44(13) |
| S4   | 2825.4(4)  | 8051.4(6)  | 3336.7(4)  | 21.0(2)   |
| S5   | 2713.8(4)  | 4808.7(6)  | 3913.4(4)  | 20.7(2)   |
| S6   | 1328.4(4)  | 5726.5(6)  | 2709.2(4)  | 21.5(2)   |
| O11  | 2628.5(10) | 4110.4(16) | 4238.2(11) | 25.1(7)   |

| Atom | x          | y           | z          | $U_{eq}$  |
|------|------------|-------------|------------|-----------|
| O8   | 2457.5(9)  | 6280.2(15)  | 2770.3(11) | 22.6(7)   |
| O9   | 2679.6(11) | 8857.5(18)  | 3147.0(12) | 30.4(7)   |
| O13  | 1024.8(10) | 5071.6(16)  | 2831.0(12) | 25.1(7)   |
| O14  | 1699.1(10) | 5476.3(17)  | 2414.0(11) | 25.8(7)   |
| O12  | 2681.9(11) | 4656.3(17)  | 3357.1(11) | 25.9(7)   |
| O10  | 3000(1)    | 7509.6(17)  | 2955.7(11) | 27.8(7)   |
| N6   | 1824.3(12) | 6844(2)     | 4171.1(13) | 22.6(8)   |
| N5   | 2450.8(12) | 7592.6(19)  | 3614.1(13) | 21.4(8)   |
| N8   | 1523.6(12) | 6224(2)     | 3205.4(14) | 22.5(8)   |
| N7   | 2402.8(13) | 5570(2)     | 4003.2(13) | 23.5(8)   |
| C47  | 1177.4(15) | 6365(3)     | 3577.6(17) | 27.3(10)  |
| C43  | 3961.1(16) | 5785(3)     | 3902.1(18) | 30.8(11)  |
| C41  | 3937(2)    | 5150(3)     | 4722(2)    | 49.4(15)  |
| C51  | 401.5(16)  | 7478(3)     | 1703.8(17) | 26.6(10)  |
| C28  | 3298.2(15) | 8258(2)     | 3790.8(16) | 21.7(9)   |
| C48  | 977.1(14)  | 6421(2)     | 2312.6(16) | 19.6(9)   |
| C42  | 4176.4(17) | 5602(3)     | 4383(2)    | 34.7(12)  |
| C36  | 2054.0(16) | 7590(3)     | 4388.6(16) | 26.2(10)  |
| C29  | 3488.4(16) | 7616(3)     | 4095.0(17) | 29.4(11)  |
| C35  | 2210.2(16) | 8133(2)     | 3960.0(17) | 25.7(10)  |
| C50  | 355.7(16)  | 6630(3)     | 1657.1(18) | 29.6(11)  |
| C49  | 640.0(15)  | 6097(3)     | 1964.4(17) | 25.9(10)  |
| C38  | 2321.4(16) | 5736(3)     | 4548.4(16) | 27.5(10)  |
| C31  | 4082.3(17) | 8528(3)     | 4461.5(19) | 36.1(12)  |
| C53  | 1031.1(16) | 7269(3)     | 2358.1(17) | 25.6(10)  |
| C54  | 74.1(17)   | 8051(3)     | 1400.0(19) | 37.4(12)  |
| C40  | 3495.4(18) | 4893(3)     | 4574.5(19) | 40.6(13)  |
| C30  | 3878.5(17) | 7765(3)     | 4424.7(18) | 33.9(12)  |
| C44  | 3524.5(15) | 5544(3)     | 3748.8(17) | 25(1)     |
| C37  | 1860.3(16) | 6148(3)     | 4547.4(17) | 28.9(10)  |
| C32  | 3888.9(17) | 9157(3)     | 4147(2)    | 39.0(13)  |
| C46  | 1354.3(15) | 7015(3)     | 3960.9(17) | 26.4(10)  |
| C39  | 3290.1(16) | 5088(2)     | 4085.3(16) | 23.3(10)  |
| C34  | 4494.5(19) | 8695(4)     | 4840(2)    | 58.5(17)  |
| C33  | 3502.4(16) | 9037(3)     | 3811.7(18) | 28.8(11)  |
| C52  | 739.8(15)  | 7787(3)     | 2057.3(18) | 27.2(10)  |
| C45  | 4660.7(17) | 5875(3)     | 4540(2)    | 47.5(15)  |
| Co3  | 2883.5(2)  | -3325.1(3)  | 1385.9(2)  | 20.70(13) |
| S7   | 3675.2(4)  | -4157.3(6)  | 2100.0(4)  | 21.2(2)   |
| S8   | 2431.9(4)  | -4966.7(6)  | 905.3(4)   | 24.3(2)   |
| S9   | 2124.7(4)  | -2099.6(6)  | 1715.3(4)  | 22.1(2)   |
| O15  | 3282.9(10) | -4362.6(17) | 2369.5(11) | 24.5(7)   |
| O16  | 3922.7(11) | -4844.3(18) | 1909.9(12) | 29.0(7)   |
| O17  | 2644.2(12) | -5629.0(18) | 646.8(11)  | 35.2(8)   |
| O18  | 2393.9(11) | -5068.1(18) | 1458.1(11) | 28.1(7)   |
| O19  | 2010.9(10) | -2845.9(17) | 1986.5(11) | 26.6(7)   |
| O20  | 2151.7(11) | -1348.8(17) | 2023.0(12) | 30.2(7)   |
| N9   | 3509.4(12) | -3509(2)    | 1663.0(13) | 22.8(8)   |
| N11  | 2665.7(13) | -4106(2)    | 840.8(13)  | 24.4(8)   |
| N12  | 2560.9(13) | -2284(2)    | 1442.1(14) | 24.2(8)   |
| N10  | 3188.3(13) | -2722(2)    | 786.3(14)  | 25.9(8)   |
| C62  | 3861.0(16) | -3230(3)    | 1332.8(18) | 32.5(11)  |
| C78  | 939.1(16)  | -1697(3)    | 468.0(17)  | 27.5(10)  |
| C77  | 1192.2(16) | -2418(3)    | 492.3(17)  | 29.1(11)  |
| C76  | 1550.1(16) | -2533(3)    | 865.5(18)  | 28.8(11)  |
| C63  | 3656.9(16) | -2544(3)    | 997.3(19)  | 35.3(12)  |
| C64  | 3178.7(19) | -3332(3)    | 350.0(18)  | 38.4(13)  |
| C65  | 2756.5(16) | -3851(3)    | 315.4(16)  | 28.3(10)  |

| Atom | x          | y          | z          | $U_{eq}$  |
|------|------------|------------|------------|-----------|
| C74  | 2746.0(16) | -1598(3)   | 1137.1(17) | 27.8(10)  |
| C73  | 2914.7(17) | -1992(3)   | 655.7(19)  | 34.4(12)  |
| C55  | 4070.9(15) | -3617(3)   | 2539.8(16) | 21.6(9)   |
| C56  | 4483.8(15) | -3957(3)   | 2712.4(17) | 26.1(10)  |
| C57  | 4788.2(16) | -3508(3)   | 3042.3(18) | 31.1(11)  |
| C58  | 4688.2(16) | -2720(3)   | 3204.6(17) | 28.9(11)  |
| C59  | 4267.7(16) | -2389(3)   | 3023.8(17) | 28.7(10)  |
| C60  | 3960.8(16) | -2820(3)   | 2684.7(17) | 26.8(10)  |
| C61  | 5017.9(17) | -2228(3)   | 3563(2)    | 41.2(13)  |
| C75  | 1667.0(15) | -1929(2)   | 1231.0(16) | 22.9(10)  |
| C80  | 1424.4(15) | -1192(2)   | 1211.6(18) | 25(1)     |
| C79  | 1064.8(16) | -1088(3)   | 836.5(18)  | 28.9(11)  |
| C81  | 547.9(17)  | -1558(3)   | 63(2)      | 42.6(13)  |
| C66  | 1873.0(15) | -4873(2)   | 602.0(17)  | 22.1(9)   |
| C67  | 1507.9(16) | -4750(2)   | 892.7(18)  | 27.5(10)  |
| C68  | 1082.4(17) | -4625(3)   | 642.2(19)  | 33.9(12)  |
| C69  | 1009.4(18) | -4592(3)   | 99.1(19)   | 34.6(12)  |
| C70  | 1377.3(17) | -4719(3)   | -188.5(17) | 29.0(11)  |
| C71  | 1808.6(17) | -4859(2)   | 58.4(16)   | 25.5(10)  |
| C72  | 546.1(18)  | -4424(4)   | -176(2)    | 52.7(16)  |
| Co4  | 1824.5(2)  | 1748.2(3)  | 3422.6(2)  | 18.01(13) |
| S10  | 2694.7(4)  | 895.8(6)   | 3932.6(4)  | 18.9(2)   |
| S11  | 1721.9(4)  | 2914.7(6)  | 2461.3(4)  | 19.8(2)   |
| S12  | 1261.5(4)  | 155.9(6)   | 3116.3(4)  | 20.0(2)   |
| O21  | 2713.0(9)  | 746.5(16)  | 3376(1)    | 20.2(6)   |
| O22  | 2664.6(10) | 171.2(16)  | 4254.6(11) | 23.6(7)   |
| O23  | 1959.4(10) | 3634.8(16) | 2290.0(11) | 23.7(7)   |
| O24  | 1856.5(10) | 2135.3(17) | 2242.4(11) | 23.0(7)   |
| O25  | 1701.8(10) | 18.0(17)   | 2920.9(11) | 24.2(7)   |
| O26  | 1093.5(10) | -477.9(17) | 3440.1(11) | 27.1(7)   |
| N13  | 2300.3(11) | 1532(2)    | 3972.2(12) | 19.5(8)   |
| N15  | 1762.3(12) | 2809.2(19) | 3062.5(13) | 20.9(8)   |
| N16  | 1294.3(12) | 1029(2)    | 3389.8(13) | 21.5(8)   |
| N14  | 1506.7(12) | 2365.9(19) | 4011.0(13) | 20.2(8)   |
| C89  | 2203.3(15) | 1807(2)    | 4496.8(16) | 22.8(9)   |
| C90  | 1869.3(18) | 2520(3)    | 4425.3(18) | 39.0(13)  |
| C91  | 1314(2)    | 3131(3)    | 3770(2)    | 43.2(14)  |
| C92  | 1610.8(16) | 3489(2)    | 3388.6(16) | 23.7(10)  |
| C101 | 937.6(15)  | 1296(3)    | 3704.6(17) | 24.4(10)  |
| C100 | 1154.8(19) | 1800(3)    | 4163(2)    | 43.2(14)  |
| C82  | 3197.3(14) | 1417(3)    | 4175.8(15) | 20.1(9)   |
| C83  | 3276.0(15) | 2205(3)    | 3991.3(16) | 23.5(10)  |
| C84  | 3666.3(17) | 2622(3)    | 4180.8(17) | 29.0(11)  |
| C85  | 3980.4(16) | 2265(3)    | 4552.5(17) | 26.4(10)  |
| C86  | 3890.3(16) | 1490(3)    | 4741.2(17) | 28.3(10)  |
| C87  | 3497.8(15) | 1064(3)    | 4554.7(16) | 24.4(10)  |
| C88  | 4412.8(17) | 2721(3)    | 4742(2)    | 39.3(13)  |
| C102 | 867.5(15)  | 225(2)     | 2554.3(16) | 21.3(9)   |
| C103 | 418.6(16)  | 7(3)       | 2572.6(18) | 27.9(10)  |
| C104 | 113.2(16)  | 75(3)      | 2135.2(19) | 34.4(12)  |
| C105 | 255.0(17)  | 372(3)     | 1665.8(18) | 33.8(12)  |
| C106 | 705.2(17)  | 597(3)     | 1654.6(18) | 31.1(11)  |
| C107 | 1016.9(15) | 527(3)     | 2094.3(17) | 24.7(10)  |
| C108 | -69.9(19)  | 441(4)     | 1186(2)    | 52.8(16)  |
| C93  | 1145.1(15) | 3052(2)    | 2237.4(16) | 20.7(9)   |
| C94  | 828.4(15)  | 2492(2)    | 2386.9(17) | 23.5(10)  |
| C95  | 380.0(16)  | 2538(3)    | 2181.8(17) | 26.1(10)  |
| C96  | 235.8(15)  | 3146(2)    | 1821.6(17) | 23.4(10)  |

| Atom | x          | y         | z          | $U_{eq}$ |
|------|------------|-----------|------------|----------|
| C97  | 551.4(16)  | 3719(3)   | 1691.9(17) | 25.4(10) |
| C98  | 1001.8(16) | 3690(2)   | 1894.7(16) | 23.7(10) |
| C99  | -247.0(16) | 3154(3)   | 1574.5(18) | 31.4(11) |
| O27  | 3712.2(16) | 4788(3)   | 772.7(17)  | 71.1(13) |
| Sr1  | 2422.7(2)  | -87.1(2)  | 2515.4(2)  | 17.64(9) |
| Sr2  | 2506.3(2)  | 4814.1(2) | 2413.1(2)  | 17.26(9) |

**Table S13:** Anisotropic Displacement Parameters ( $\times 10^4$ ) **CMW-03-086SRTS**. The anisotropic displacement factor exponent takes the form:  $-2\pi^2[h^2a^{*2} \times U_{11} + \dots + 2hka^* \times b^* \times U_{12}]$

| Atom | $U_{11}$ | $U_{22}$ | $U_{33}$ | $U_{23}$  | $U_{13}$ | $U_{12}$ |
|------|----------|----------|----------|-----------|----------|----------|
| Co1  | 18.8(3)  | 20.8(3)  | 14.8(3)  | -0.7(2)   | 1.2(2)   | 0.0(2)   |
| S3   | 21.7(6)  | 21.7(5)  | 15.2(5)  | 0.7(4)    | 0.7(4)   | 0.5(4)   |
| S1   | 17.6(6)  | 20.8(5)  | 23.9(6)  | -3.2(4)   | 0.9(4)   | 1.5(4)   |
| S2   | 24.1(6)  | 18.6(5)  | 20.5(5)  | -2.4(4)   | 2.7(5)   | -0.1(4)  |
| O2   | 24.2(18) | 26.4(16) | 39.2(19) | -11.2(14) | -1.0(15) | 3.3(14)  |
| O1   | 15.6(15) | 22.4(14) | 18.1(14) | -0.6(12)  | -1.6(12) | -0.1(12) |
| O4   | 28.9(18) | 27.7(15) | 14.8(15) | -1.8(12)  | 3.0(13)  | -4.3(13) |
| O5   | 27.5(18) | 24.4(15) | 35.1(18) | -3.6(14)  | -2.5(15) | 5.8(14)  |
| O3   | 21.2(17) | 21.9(15) | 33.6(18) | 0.9(13)   | 3.1(14)  | -2.0(13) |
| O6   | 28.1(18) | 23.9(15) | 16.2(15) | 3.9(12)   | 1.0(13)  | -1.5(13) |
| O7   | 28.6(18) | 22.3(15) | 22.2(16) | -2.5(12)  | 0.4(14)  | 0.9(13)  |
| N1   | 18(2)    | 30.2(19) | 20.2(18) | 0.2(15)   | 5.1(16)  | 4.6(16)  |
| N2   | 18(2)    | 30.8(19) | 18.7(18) | 0.8(15)   | -1.1(15) | -2.9(16) |
| N3   | 35(2)    | 21.8(17) | 18.0(18) | 1.1(15)   | 4.1(17)  | -8.2(16) |
| N4   | 19(2)    | 28.1(19) | 15.8(17) | 1.0(15)   | -0.5(15) | 0.7(15)  |
| C22  | 26(3)    | 34(2)    | 25(2)    | 9(2)      | -1(2)    | -6(2)    |
| C23  | 18(3)    | 43(3)    | 33(3)    | 9(2)      | -4(2)    | -4(2)    |
| C8   | 21(2)    | 40(3)    | 25(2)    | 5(2)      | 5(2)     | 5(2)     |
| C2   | 24(3)    | 29(2)    | 29(2)    | -2(2)     | 0(2)     | 2(2)     |
| C14  | 42(3)    | 24(2)    | 34(3)    | -3(2)     | -7(2)    | -5(2)    |
| C3   | 40(3)    | 42(3)    | 24(2)    | -7(2)     | -1(2)    | -6(2)    |
| C20  | 20(2)    | 39(2)    | 16(2)    | 0.2(19)   | 1.7(18)  | -1(2)    |
| C13  | 32(3)    | 22(2)    | 41(3)    | -7(2)     | -3(2)    | 2(2)     |
| C9   | 24(3)    | 41(3)    | 19(2)    | -3(2)     | 5.7(19)  | 0(2)     |
| C1   | 24(2)    | 21(2)    | 17(2)    | 3.1(17)   | 0.6(18)  | -1.8(18) |
| C16  | 25(3)    | 47(3)    | 32(3)    | 0(2)      | 4(2)     | 9(2)     |
| C12  | 25(3)    | 19(2)    | 23(2)    | 4.3(17)   | 4.0(19)  | 0.3(18)  |
| C26  | 29(3)    | 33(2)    | 21(2)    | -1.1(19)  | 0(2)     | 5(2)     |
| C10  | 29(3)    | 39(3)    | 21(2)    | 5(2)      | 5(2)     | -10(2)   |
| C15  | 20(3)    | 37(3)    | 32(3)    | 11(2)     | 2(2)     | -3(2)    |
| C21  | 17(2)    | 34(2)    | 15(2)    | 1.2(18)   | 0.2(18)  | 3.5(19)  |
| C17  | 30(3)    | 30(2)    | 29(3)    | -2(2)     | 4(2)     | 8(2)     |
| C4   | 33(3)    | 49(3)    | 26(3)    | 4(2)      | -3(2)    | -7(2)    |
| C18  | 24(3)    | 54(3)    | 46(3)    | 12(3)     | -3(2)    | -8(2)    |
| C11  | 45(3)    | 27(2)    | 20(2)    | 1.6(19)   | 3(2)     | -14(2)   |
| C24  | 23(3)    | 53(3)    | 21(2)    | 13(2)     | 7(2)     | 10(2)    |
| C6   | 25(3)    | 34(2)    | 24(2)    | 1(2)      | 1(2)     | 0(2)     |
| C5   | 24(3)    | 47(3)    | 30(3)    | 12(2)     | 0(2)     | -3(2)    |
| C7   | 35(3)    | 92(5)    | 27(3)    | -5(3)     | -4(2)    | -14(3)   |
| C19  | 25(3)    | 36(2)    | 16(2)    | 7.5(19)   | 0.3(19)  | 0(2)     |
| C25  | 37(3)    | 36(3)    | 23(2)    | -3(2)     | 4(2)     | 12(2)    |
| C27  | 28(3)    | 68(4)    | 31(3)    | 8(3)      | 3(2)     | 18(3)    |
| Co2  | 19.5(3)  | 18.8(3)  | 16.7(3)  | 0.4(2)    | -0.2(2)  | -1.5(2)  |
| S4   | 25.0(6)  | 20.3(5)  | 18.0(5)  | 1.8(4)    | 3.1(5)   | -0.5(4)  |
| S5   | 25.9(6)  | 20.1(5)  | 15.4(5)  | 2.9(4)    | -1.1(4)  | -2.2(4)  |
| S6   | 19.8(6)  | 20.7(5)  | 23.5(5)  | -1.2(4)   | -0.7(5)  | 0.8(4)   |
| O11  | 32.4(19) | 20.8(14) | 21.4(16) | 5.1(12)   | -0.7(14) | -4.3(13) |

| Atom | $U_{11}$ | $U_{22}$ | $U_{33}$ | $U_{23}$ | $U_{13}$ | $U_{12}$ |
|------|----------|----------|----------|----------|----------|----------|
| O8   | 26.1(18) | 20.9(14) | 20.8(16) | 0.4(12)  | 1.9(13)  | -1.4(13) |
| O9   | 34(2)    | 25.5(16) | 30.7(18) | 6.3(14)  | -4.8(15) | 1.0(14)  |
| O13  | 20.1(17) | 21.4(14) | 33.1(18) | 0.7(13)  | -0.6(14) | -2.6(12) |
| O14  | 22.8(17) | 26.9(15) | 27.6(17) | -3.1(13) | 2.4(14)  | 3.5(13)  |
| O12  | 35.5(19) | 25.3(15) | 16.3(15) | 1.1(12)  | -1.3(14) | 1.4(14)  |
| O10  | 27.8(19) | 32.8(17) | 24.2(16) | -7.7(14) | 10.1(14) | -5.1(14) |
| N6   | 24(2)    | 24.3(18) | 20.1(19) | 0.4(15)  | 3.2(16)  | -4.0(15) |
| N5   | 26(2)    | 15.6(16) | 22.8(19) | -2.2(14) | 5.6(16)  | -3.2(15) |
| N8   | 18(2)    | 24.4(18) | 24.8(19) | 1.1(15)  | 1.1(16)  | 2.5(15)  |
| N7   | 29(2)    | 25.7(18) | 15.8(18) | 6.0(15)  | 1.7(16)  | -0.2(16) |
| C47  | 22(3)    | 38(3)    | 22(2)    | -3(2)    | 3(2)     | -1(2)    |
| C43  | 32(3)    | 35(3)    | 26(2)    | 2(2)     | 5(2)     | -1(2)    |
| C41  | 48(4)    | 62(4)    | 34(3)    | 23(3)    | -17(3)   | -15(3)   |
| C51  | 23(3)    | 32(2)    | 26(2)    | 7(2)     | 7(2)     | 7(2)     |
| C28  | 22(2)    | 22(2)    | 22(2)    | -1.9(17) | 7.2(19)  | -0.2(18) |
| C48  | 16(2)    | 23(2)    | 21(2)    | -3.3(17) | 3.8(18)  | 0.5(17)  |
| C42  | 31(3)    | 31(2)    | 41(3)    | 6(2)     | -3(2)    | -4(2)    |
| C36  | 30(3)    | 29(2)    | 20(2)    | -4.1(19) | 4(2)     | -3(2)    |
| C29  | 29(3)    | 32(2)    | 27(2)    | -1(2)    | 1(2)     | 2(2)     |
| C35  | 28(3)    | 22(2)    | 28(2)    | -6.7(19) | 7(2)     | -1.1(19) |
| C50  | 26(3)    | 36(3)    | 26(2)    | -3(2)    | -1(2)    | -2(2)    |
| C49  | 27(3)    | 25(2)    | 26(2)    | -3.5(19) | 4(2)     | 0.9(19)  |
| C38  | 34(3)    | 33(2)    | 15(2)    | 3.4(18)  | 3(2)     | 3(2)     |
| C31  | 25(3)    | 55(3)    | 28(3)    | -17(2)   | 2(2)     | 5(2)     |
| C53  | 26(3)    | 27(2)    | 24(2)    | 1.5(19)  | 4(2)     | 4.6(19)  |
| C54  | 30(3)    | 45(3)    | 37(3)    | 15(2)    | 2(2)     | 9(2)     |
| C40  | 34(3)    | 54(3)    | 33(3)    | 20(2)    | -5(2)    | -19(3)   |
| C30  | 32(3)    | 47(3)    | 22(2)    | -2(2)    | 2(2)     | 10(2)    |
| C44  | 24(3)    | 29(2)    | 23(2)    | 2.8(19)  | 5(2)     | 3.3(19)  |
| C37  | 32(3)    | 33(2)    | 22(2)    | 2(2)     | 5(2)     | -5(2)    |
| C32  | 26(3)    | 34(3)    | 56(3)    | -14(3)   | 0(3)     | -3(2)    |
| C46  | 24(3)    | 30(2)    | 26(2)    | -0.9(19) | 7(2)     | -1(2)    |
| C39  | 28(3)    | 20(2)    | 20(2)    | 1.5(17)  | -1.8(19) | 3.1(18)  |
| C34  | 35(3)    | 92(5)    | 46(3)    | -25(3)   | -11(3)   | 0(3)     |
| C33  | 25(3)    | 24(2)    | 37(3)    | -1(2)    | 2(2)     | -1.7(19) |
| C52  | 24(3)    | 26(2)    | 32(3)    | 5(2)     | 4(2)     | 1.6(19)  |
| C45  | 31(3)    | 46(3)    | 63(4)    | 12(3)    | -8(3)    | -8(3)    |
| Co3  | 20.4(3)  | 24.9(3)  | 16.4(3)  | 1.5(2)   | -0.3(2)  | -0.1(2)  |
| S7   | 19.8(6)  | 23.9(5)  | 19.9(5)  | -1.0(4)  | 1.7(4)   | 0.5(4)   |
| S8   | 32.2(7)  | 24.7(5)  | 15.2(5)  | -0.5(4)  | -1.6(5)  | 3.6(5)   |
| S9   | 25.2(6)  | 21.1(5)  | 19.5(5)  | -1.5(4)  | -0.1(5)  | -1.7(4)  |
| O15  | 23.5(17) | 24.8(15) | 25.6(16) | 0.3(13)  | 4.6(14)  | -1.5(13) |
| O16  | 26.6(18) | 33.0(17) | 27.3(17) | -5.3(14) | 2.3(14)  | 6.6(14)  |
| O17  | 53(2)    | 30.7(17) | 21.1(16) | -2.6(14) | -1.8(16) | 12.8(16) |
| O18  | 35(2)    | 33.8(17) | 14.9(15) | -1.0(13) | -2.4(14) | 0.0(14)  |
| O19  | 29.2(19) | 28.7(16) | 21.4(16) | 3.2(13)  | 0.1(14)  | -5.6(14) |
| O20  | 34(2)    | 25.9(16) | 30.0(17) | -6.3(14) | -3.6(15) | -0.8(14) |
| N9   | 18(2)    | 28.9(19) | 21.5(19) | -0.5(15) | 2.3(16)  | -0.9(16) |
| N11  | 29(2)    | 30.2(19) | 13.1(17) | -3.9(15) | -0.3(16) | -0.7(17) |
| N12  | 26(2)    | 22.3(18) | 23.8(19) | 5.2(15)  | 0.2(17)  | -0.8(16) |
| N10  | 22(2)    | 33(2)    | 22.3(19) | 2.8(16)  | 3.1(16)  | -3.0(17) |
| C62  | 21(3)    | 49(3)    | 27(3)    | 11(2)    | 3(2)     | -1(2)    |
| C78  | 26(3)    | 33(2)    | 24(2)    | 7(2)     | 8(2)     | -4(2)    |
| C77  | 30(3)    | 33(2)    | 24(2)    | -6(2)    | -2(2)    | -5(2)    |
| C76  | 32(3)    | 22(2)    | 32(3)    | -4.1(19) | 0(2)     | 2.9(19)  |
| C63  | 24(3)    | 52(3)    | 30(3)    | 6(2)     | 5(2)     | -9(2)    |
| C64  | 49(4)    | 47(3)    | 19(2)    | -1(2)    | 4(2)     | -7(3)    |
| C65  | 34(3)    | 31(2)    | 19(2)    | 0.9(19)  | 1(2)     | -2(2)    |

| Atom | $U_{11}$ | $U_{22}$ | $U_{33}$ | $U_{23}$ | $U_{13}$ | $U_{12}$ |
|------|----------|----------|----------|----------|----------|----------|
| C74  | 27(3)    | 27(2)    | 30(3)    | 6.2(19)  | 0(2)     | -6(2)    |
| C73  | 32(3)    | 36(3)    | 35(3)    | 13(2)    | 3(2)     | -4(2)    |
| C55  | 19(2)    | 30(2)    | 17(2)    | 1.3(18)  | 2.2(18)  | 1.6(18)  |
| C56  | 19(2)    | 32(2)    | 27(2)    | -1(2)    | 3(2)     | 0.9(19)  |
| C57  | 19(3)    | 44(3)    | 30(3)    | 5(2)     | 1(2)     | 5(2)     |
| C58  | 22(3)    | 43(3)    | 21(2)    | -2(2)    | 3(2)     | -7(2)    |
| C59  | 27(3)    | 32(2)    | 28(2)    | -6(2)    | 5(2)     | -3(2)    |
| C60  | 20(2)    | 34(2)    | 27(2)    | 2(2)     | 2(2)     | 0(2)     |
| C61  | 25(3)    | 56(3)    | 40(3)    | -7(3)    | -6(2)    | -9(2)    |
| C75  | 24(3)    | 22(2)    | 23(2)    | 0.1(18)  | 5.5(19)  | -0.8(18) |
| C80  | 23(3)    | 20(2)    | 32(3)    | -2.2(19) | 6(2)     | -3.1(18) |
| C79  | 30(3)    | 25(2)    | 33(3)    | 5(2)     | 5(2)     | 0(2)     |
| C81  | 30(3)    | 59(3)    | 38(3)    | 0(3)     | -2(2)    | 7(3)     |
| C66  | 28(3)    | 12.8(18) | 24(2)    | -1.3(17) | -4(2)    | -7.2(17) |
| C67  | 37(3)    | 21(2)    | 24(2)    | 2.0(18)  | 1(2)     | -1(2)    |
| C68  | 29(3)    | 35(3)    | 40(3)    | 2(2)     | 14(2)    | -5(2)    |
| C69  | 34(3)    | 33(3)    | 34(3)    | 5(2)     | -9(2)    | -8(2)    |
| C70  | 41(3)    | 23(2)    | 22(2)    | 3.2(18)  | -6(2)    | -8(2)    |
| C71  | 38(3)    | 18(2)    | 20(2)    | -0.4(17) | -1(2)    | -1.6(19) |
| C72  | 35(3)    | 68(4)    | 53(4)    | 10(3)    | -5(3)    | -11(3)   |
| Co4  | 19.4(3)  | 17.5(3)  | 17.0(3)  | -0.6(2)  | 0.7(2)   | -0.5(2)  |
| S10  | 19.6(6)  | 20.5(5)  | 16.2(5)  | 0.3(4)   | -0.3(4)  | -0.8(4)  |
| S11  | 20.3(6)  | 19.0(5)  | 20.3(5)  | -0.6(4)  | 2.5(4)   | -1.9(4)  |
| S12  | 18.4(6)  | 21.2(5)  | 20.4(5)  | -0.8(4)  | 1.7(4)   | -1.8(4)  |
| O21  | 19.8(16) | 25.4(15) | 15.5(14) | -0.7(12) | 2.5(12)  | -3.1(13) |
| O22  | 25.9(18) | 23.8(15) | 21.0(15) | 1.5(12)  | 1.9(13)  | -4.3(13) |
| O23  | 25.5(18) | 22.0(15) | 23.8(16) | 1.9(12)  | 3.4(14)  | -2.3(13) |
| O24  | 18.5(16) | 24.3(15) | 26.4(16) | -2.2(13) | 3.0(13)  | 1.3(12)  |
| O25  | 19.6(17) | 27.5(15) | 25.2(16) | -3.4(13) | 0.6(13)  | 1.7(13)  |
| O26  | 28.9(19) | 23.2(15) | 28.8(17) | 3.2(13)  | 0.6(14)  | -5.4(13) |
| N13  | 16.5(19) | 28.3(18) | 13.7(17) | -5.3(14) | 1.6(15)  | -0.2(15) |
| N15  | 22(2)    | 17.7(17) | 23.5(19) | 1.6(14)  | 2.3(16)  | 0.3(15)  |
| N16  | 21(2)    | 23.2(17) | 21.8(19) | -2.3(15) | 7.1(16)  | -2.2(15) |
| N14  | 23(2)    | 17.7(16) | 19.4(18) | 0.1(14)  | 0.3(16)  | -0.2(15) |
| C89  | 29(3)    | 22(2)    | 17(2)    | -1.8(17) | 1.2(19)  | 3.3(19)  |
| C90  | 40(3)    | 53(3)    | 24(3)    | -10(2)   | 2(2)     | 4(3)     |
| C91  | 59(4)    | 32(3)    | 39(3)    | -1(2)    | 8(3)     | 12(3)    |
| C92  | 31(3)    | 18(2)    | 22(2)    | -2.8(17) | -1(2)    | 3.7(18)  |
| C101 | 21(2)    | 28(2)    | 26(2)    | -3.0(19) | 6.0(19)  | 1.5(19)  |
| C100 | 41(3)    | 50(3)    | 41(3)    | -15(3)   | 17(3)    | -10(3)   |
| C82  | 21(2)    | 29(2)    | 10.4(19) | -1.6(17) | 3.3(17)  | 0.9(18)  |
| C83  | 25(3)    | 29(2)    | 16(2)    | -1.4(18) | -0.1(19) | 0.5(19)  |
| C84  | 36(3)    | 30(2)    | 22(2)    | -1.3(19) | 5(2)     | -9(2)    |
| C85  | 24(3)    | 36(3)    | 20(2)    | -9.7(19) | 8(2)     | -5(2)    |
| C86  | 22(3)    | 40(3)    | 22(2)    | -7(2)    | -2(2)    | 3(2)     |
| C87  | 25(3)    | 27(2)    | 21(2)    | 0.3(18)  | 3.1(19)  | -2.1(19) |
| C88  | 25(3)    | 51(3)    | 41(3)    | -15(3)   | 1(2)     | -10(2)   |
| C102 | 26(2)    | 16.6(19) | 21(2)    | -4.8(17) | 0.7(19)  | 2.2(18)  |
| C103 | 26(3)    | 33(2)    | 25(2)    | -3(2)    | 6(2)     | -3(2)    |
| C104 | 19(3)    | 46(3)    | 37(3)    | -12(2)   | -4(2)    | 5(2)     |
| C105 | 29(3)    | 42(3)    | 29(3)    | -10(2)   | -5(2)    | 13(2)    |
| C106 | 39(3)    | 32(2)    | 22(2)    | -2(2)    | 1(2)     | 9(2)     |
| C107 | 21(2)    | 26(2)    | 27(2)    | 1.0(19)  | 3(2)     | 0.6(19)  |
| C108 | 45(4)    | 78(4)    | 33(3)    | -10(3)   | -10(3)   | 22(3)    |
| C93  | 27(3)    | 17.3(19) | 17(2)    | -5.0(16) | 1.9(18)  | 0.4(18)  |
| C94  | 24(3)    | 22(2)    | 26(2)    | 4.0(18)  | 4(2)     | -1.1(18) |
| C95  | 26(3)    | 23(2)    | 30(3)    | 1.3(19)  | 7(2)     | -4.5(19) |
| C96  | 23(2)    | 22(2)    | 25(2)    | -7.3(18) | 1.2(19)  | 5.3(18)  |

| Atom | $U_{11}$ | $U_{22}$  | $U_{33}$  | $U_{23}$  | $U_{13}$ | $U_{12}$  |
|------|----------|-----------|-----------|-----------|----------|-----------|
| C97  | 32(3)    | 20(2)     | 23(2)     | 0.2(18)   | -2(2)    | 4.8(19)   |
| C98  | 31(3)    | 18(2)     | 22(2)     | -0.7(17)  | 1(2)     | -1.7(18)  |
| C99  | 26(3)    | 34(3)     | 33(3)     | -4(2)     | 0(2)     | 4(2)      |
| O27  | 86(4)    | 67(3)     | 61(3)     | 0(2)      | 14(3)    | 3(3)      |
| Sr1  | 19.6(2)  | 17.79(18) | 15.40(19) | 0.46(15)  | 1.16(16) | -0.66(15) |
| Sr2  | 19.9(2)  | 16.80(18) | 14.92(19) | -0.37(15) | 0.71(16) | 0.08(15)  |

**Table S14:** Bond Lengths in Å for **CMW-03-086SRTS**.

| Atom | Atom | Length/Å | Atom | Atom | Length/Å |
|------|------|----------|------|------|----------|
| Co1  | O1   | 2.167(3) | C24  | C25  | 1.389(7) |
| Co1  | N1   | 1.996(3) | C24  | C27  | 1.509(6) |
| Co1  | N2   | 2.183(3) | C6   | C5   | 1.391(6) |
| Co1  | N3   | 2.029(3) | Co2  | O8   | 2.171(3) |
| Co1  | N4   | 2.018(3) | Co2  | N6   | 2.178(3) |
| S3   | O6   | 1.460(3) | Co2  | N5   | 2.035(3) |
| S3   | O7   | 1.444(3) | Co2  | N8   | 2.014(4) |
| S3   | N4   | 1.573(4) | Co2  | N7   | 2.008(3) |
| S3   | C21  | 1.788(4) | S4   | O9   | 1.445(3) |
| S1   | O2   | 1.449(3) | S4   | O10  | 1.450(3) |
| S1   | O3   | 1.450(3) | S4   | N5   | 1.564(4) |
| S1   | N1   | 1.571(4) | S4   | C28  | 1.767(4) |
| S1   | C1   | 1.773(4) | S5   | O11  | 1.444(3) |
| S2   | O4   | 1.448(3) | S5   | O12  | 1.452(3) |
| S2   | O5   | 1.445(3) | S5   | N7   | 1.568(4) |
| S2   | N3   | 1.557(4) | S5   | C39  | 1.778(5) |
| S2   | C12  | 1.764(5) | S6   | O13  | 1.444(3) |
| O1   | Sr1  | 2.560(3) | S6   | O14  | 1.453(3) |
| O5   | Sr2  | 2.442(3) | S6   | N8   | 1.575(4) |
| O3   | Sr1  | 2.448(3) | S6   | C48  | 1.784(4) |
| O6   | Sr1  | 2.664(3) | O8   | Sr2  | 2.555(3) |
| N1   | C8   | 1.468(5) | O14  | Sr2  | 2.618(3) |
| N2   | C9   | 1.472(5) | O12  | Sr2  | 2.456(3) |
| N2   | C10  | 1.480(5) | N6   | C36  | 1.469(5) |
| N2   | C19  | 1.480(5) | N6   | C37  | 1.485(5) |
| N3   | C11  | 1.487(5) | N6   | C46  | 1.469(6) |
| N4   | C20  | 1.484(5) | N5   | C35  | 1.481(5) |
| C22  | C23  | 1.392(6) | N8   | C47  | 1.488(5) |
| C22  | C21  | 1.367(6) | N7   | C38  | 1.476(5) |
| C23  | C24  | 1.374(7) | C47  | C46  | 1.503(6) |
| C8   | C9   | 1.528(6) | C43  | C42  | 1.372(6) |
| C2   | C3   | 1.395(6) | C43  | C44  | 1.370(6) |
| C2   | C1   | 1.387(6) | C41  | C42  | 1.387(7) |
| C14  | C13  | 1.381(6) | C41  | C40  | 1.389(7) |
| C14  | C15  | 1.387(7) | C51  | C50  | 1.383(6) |
| C3   | C4   | 1.383(7) | C51  | C54  | 1.506(6) |
| C20  | C19  | 1.508(6) | C51  | C52  | 1.381(6) |
| C13  | C12  | 1.387(6) | C28  | C29  | 1.387(6) |
| C1   | C6   | 1.377(6) | C28  | C33  | 1.398(6) |
| C16  | C15  | 1.385(7) | C48  | C49  | 1.380(6) |
| C16  | C17  | 1.377(7) | C48  | C53  | 1.387(6) |
| C12  | C17  | 1.384(6) | C42  | C45  | 1.516(7) |
| C26  | C21  | 1.398(6) | C36  | C35  | 1.521(6) |
| C26  | C25  | 1.379(6) | C29  | C30  | 1.387(7) |
| C10  | C11  | 1.488(6) | C50  | C49  | 1.397(6) |
| C15  | C18  | 1.501(6) | C38  | C37  | 1.518(6) |
| C4   | C5   | 1.386(7) | C31  | C30  | 1.374(7) |
| C4   | C7   | 1.506(6) | C31  | C32  | 1.390(7) |



| Atom | Atom             | Length/Å | Atom                    | Atom | Length/Å |
|------|------------------|----------|-------------------------|------|----------|
| C31  | C34              | 1.511(7) | Co4                     | N13  | 1.931(3) |
| C53  | C52              | 1.385(6) | Co4                     | N15  | 1.953(3) |
| C40  | C39              | 1.384(6) | Co4                     | N16  | 1.948(3) |
| C44  | C39              | 1.378(6) | Co4                     | N14  | 2.114(3) |
| C32  | C33              | 1.379(6) | S10                     | O21  | 1.464(3) |
| Co3  | N9               | 1.942(4) | S10                     | O22  | 1.445(3) |
| Co3  | N11              | 1.954(3) | S10                     | N13  | 1.567(3) |
| Co3  | N12              | 1.948(4) | S10                     | C82  | 1.771(4) |
| Co3  | N10              | 2.106(4) | S11                     | O23  | 1.452(3) |
| S7   | O15              | 1.449(3) | S11                     | O24  | 1.454(3) |
| S7   | O16              | 1.443(3) | S11                     | N15  | 1.555(4) |
| S7   | N9               | 1.584(4) | S11                     | C93  | 1.762(5) |
| S7   | C55              | 1.780(4) | S12                     | O25  | 1.459(3) |
| S8   | O17              | 1.439(3) | S12                     | O26  | 1.442(3) |
| S8   | O18              | 1.452(3) | S12                     | N16  | 1.579(3) |
| S8   | N11              | 1.571(4) | S12                     | C102 | 1.774(4) |
| S8   | C66              | 1.766(5) | O21                     | Sr1  | 2.669(3) |
| S9   | O19              | 1.452(3) | O23                     | Sr2  | 2.502(3) |
| S9   | O20              | 1.450(3) | O25                     | Sr1  | 2.471(3) |
| S9   | N12              | 1.558(4) | N13                     | C89  | 1.480(5) |
| S9   | C75              | 1.773(5) | N15                     | C92  | 1.481(5) |
| O15  | Sr2 <sup>1</sup> | 2.668(3) | N16                     | C101 | 1.458(5) |
| O20  | Sr1              | 2.496(3) | N14                     | C90  | 1.461(6) |
| N9   | C62              | 1.478(5) | N14                     | C91  | 1.475(6) |
| N11  | C65              | 1.468(5) | N14                     | C100 | 1.468(6) |
| N12  | C74              | 1.496(5) | C89                     | C90  | 1.519(6) |
| N10  | C63              | 1.468(6) | C91                     | C92  | 1.498(7) |
| N10  | C64              | 1.496(6) | C101                    | C100 | 1.526(6) |
| N10  | C73              | 1.454(6) | C82                     | C83  | 1.389(6) |
| C62  | C63              | 1.499(6) | C82                     | C87  | 1.380(6) |
| C78  | C77              | 1.385(6) | C83                     | C84  | 1.385(6) |
| C78  | C79              | 1.394(6) | C84                     | C85  | 1.394(6) |
| C78  | C81              | 1.499(6) | C85                     | C86  | 1.381(6) |
| C77  | C76              | 1.373(6) | C85                     | C88  | 1.517(6) |
| C76  | C75              | 1.379(6) | C86                     | C87  | 1.395(6) |
| C64  | C65              | 1.501(6) | C102                    | C103 | 1.379(6) |
| C74  | C73              | 1.524(6) | C102                    | C107 | 1.396(6) |
| C55  | C56              | 1.374(6) | C103                    | C104 | 1.380(6) |
| C55  | C60              | 1.391(6) | C104                    | C105 | 1.405(7) |
| C56  | C57              | 1.384(6) | C105                    | C106 | 1.383(7) |
| C57  | C58              | 1.384(6) | C105                    | C108 | 1.498(6) |
| C58  | C59              | 1.393(6) | C106                    | C107 | 1.396(6) |
| C58  | C61              | 1.505(6) | C93                     | C94  | 1.385(6) |
| C59  | C60              | 1.386(6) | C93                     | C98  | 1.398(5) |
| C75  | C80              | 1.391(6) | C94                     | C95  | 1.382(6) |
| C80  | C79              | 1.377(6) | C95                     | C96  | 1.392(6) |
| C66  | C67              | 1.388(6) | C96                     | C97  | 1.381(6) |
| C66  | C71              | 1.398(6) | C96                     | C99  | 1.507(6) |
| C67  | C68              | 1.373(7) | C97                     | C98  | 1.384(6) |
| C68  | C69              | 1.399(7) | -----•                  |      |          |
| C69  | C70              | 1.391(7) | <sup>1</sup> +X,-1+Y,+Z |      |          |
| C69  | C72              | 1.506(7) |                         |      |          |
| C70  | C71              | 1.389(6) |                         |      |          |

**Table S15:** Bond Angles in ° for **CMW-03-086SRTS**.

| Atom | Atom | Atom | Angle/° |
|------|------|------|---------|
|------|------|------|---------|

| Atom | Atom | Atom | Angle/°    | Atom | Atom | Atom | Angle/°    |
|------|------|------|------------|------|------|------|------------|
| O1   | Co1  | N2   | 168.20(12) | C6   | C1   | C2   | 120.2(4)   |
| N1   | Co1  | O1   | 109.10(12) | C17  | C16  | C15  | 121.8(4)   |
| N1   | Co1  | N2   | 82.39(14)  | C13  | C12  | S2   | 119.7(3)   |
| N1   | Co1  | N3   | 111.56(15) | C17  | C12  | S2   | 120.9(3)   |
| N1   | Co1  | N4   | 112.62(14) | C17  | C12  | C13  | 118.9(4)   |
| N3   | Co1  | O1   | 92.39(12)  | C25  | C26  | C21  | 119.3(4)   |
| N3   | Co1  | N2   | 80.51(13)  | N2   | C10  | C11  | 111.2(4)   |
| N4   | Co1  | O1   | 96.05(12)  | C14  | C15  | C18  | 121.2(5)   |
| N4   | Co1  | N2   | 81.45(13)  | C16  | C15  | C14  | 117.2(4)   |
| N4   | Co1  | N3   | 129.07(14) | C16  | C15  | C18  | 121.7(4)   |
| O6   | S3   | N4   | 108.86(18) | C22  | C21  | S3   | 120.5(3)   |
| O6   | S3   | C21  | 107.05(19) | C22  | C21  | C26  | 120.0(4)   |
| O7   | S3   | O6   | 115.43(17) | C26  | C21  | S3   | 119.5(3)   |
| O7   | S3   | N4   | 113.58(18) | C16  | C17  | C12  | 120.2(4)   |
| O7   | S3   | C21  | 104.83(19) | C3   | C4   | C5   | 118.3(4)   |
| N4   | S3   | C21  | 106.43(19) | C3   | C4   | C7   | 120.3(5)   |
| O2   | S1   | O3   | 116.61(18) | C5   | C4   | C7   | 121.4(5)   |
| O2   | S1   | N1   | 113.08(19) | N3   | C11  | C10  | 107.7(3)   |
| O2   | S1   | C1   | 105.59(19) | C23  | C24  | C25  | 118.1(4)   |
| O3   | S1   | N1   | 106.81(18) | C23  | C24  | C27  | 121.9(5)   |
| O3   | S1   | C1   | 105.60(19) | C25  | C24  | C27  | 120.0(5)   |
| N1   | S1   | C1   | 108.68(19) | C1   | C6   | C5   | 119.8(4)   |
| O4   | S2   | N3   | 109.38(17) | C4   | C5   | C6   | 121.1(5)   |
| O4   | S2   | C12  | 104.44(19) | N2   | C19  | C20  | 110.7(3)   |
| O5   | S2   | O4   | 114.13(19) | C26  | C25  | C24  | 121.4(4)   |
| O5   | S2   | N3   | 112.99(19) | O8   | Co2  | N6   | 169.17(12) |
| O5   | S2   | C12  | 105.19(19) | N5   | Co2  | O8   | 92.68(12)  |
| N3   | S2   | C12  | 110.2(2)   | N5   | Co2  | N6   | 80.94(13)  |
| Co1  | O1   | Sr1  | 118.58(10) | N8   | Co2  | O8   | 94.83(12)  |
| S2   | O5   | Sr2  | 159.8(2)   | N8   | Co2  | N6   | 82.03(14)  |
| S1   | O3   | Sr1  | 163.43(18) | N8   | Co2  | N5   | 125.64(14) |
| S3   | O6   | Sr1  | 148.08(18) | N7   | Co2  | O8   | 109.01(13) |
| S1   | N1   | Co1  | 129.7(2)   | N7   | Co2  | N6   | 81.73(14)  |
| C8   | N1   | Co1  | 113.7(3)   | N7   | Co2  | N5   | 116.16(15) |
| C8   | N1   | S1   | 116.2(3)   | N7   | Co2  | N8   | 111.76(14) |
| C9   | N2   | Co1  | 105.2(3)   | O9   | S4   | O10  | 115.48(18) |
| C9   | N2   | C10  | 112.4(4)   | O9   | S4   | N5   | 112.48(19) |
| C9   | N2   | C19  | 113.1(3)   | O9   | S4   | C28  | 104.22(19) |
| C10  | N2   | Co1  | 108.3(2)   | O10  | S4   | N5   | 109.78(18) |
| C10  | N2   | C19  | 111.7(3)   | O10  | S4   | C28  | 104.68(19) |
| C19  | N2   | Co1  | 105.5(3)   | N5   | S4   | C28  | 109.6(2)   |
| S2   | N3   | Co1  | 131.2(2)   | O11  | S5   | O12  | 116.33(17) |
| C11  | N3   | Co1  | 113.4(3)   | O11  | S5   | N7   | 112.99(18) |
| C11  | N3   | S2   | 114.5(3)   | O11  | S5   | C39  | 105.74(19) |
| S3   | N4   | Co1  | 130.4(2)   | O12  | S5   | N7   | 107.30(18) |
| C20  | N4   | Co1  | 114.9(3)   | O12  | S5   | C39  | 105.0(2)   |
| C20  | N4   | S3   | 111.7(3)   | N7   | S5   | C39  | 109.01(19) |
| C21  | C22  | C23  | 119.6(4)   | O13  | S6   | O14  | 115.29(18) |
| C24  | C23  | C22  | 121.5(5)   | O13  | S6   | N8   | 112.63(19) |
| N1   | C8   | C9   | 107.3(4)   | O13  | S6   | C48  | 104.33(19) |
| C1   | C2   | C3   | 119.2(4)   | O14  | S6   | N8   | 109.49(19) |
| C13  | C14  | C15  | 121.8(4)   | O14  | S6   | C48  | 107.57(19) |
| C4   | C3   | C2   | 121.4(5)   | N8   | S6   | C48  | 106.96(18) |
| N4   | C20  | C19  | 108.5(3)   | Co2  | O8   | Sr2  | 118.40(11) |
| C14  | C13  | C12  | 119.9(4)   | S6   | O14  | Sr2  | 148.21(18) |
| N2   | C9   | C8   | 110.5(3)   | S5   | O12  | Sr2  | 162.13(18) |
| C2   | C1   | S1   | 119.0(3)   | C36  | N6   | Co2  | 107.9(3)   |
| C6   | C1   | S1   | 120.8(3)   | C36  | N6   | C37  | 111.8(3)   |

| Atom | Atom | Atom | Angle/°    | Atom | Atom | Atom             | Angle/°    |
|------|------|------|------------|------|------|------------------|------------|
| C37  | N6   | Co2  | 106.8(3)   | O16  | S7   | N9               | 113.60(19) |
| C46  | N6   | Co2  | 104.9(3)   | O16  | S7   | C55              | 105.8(2)   |
| C46  | N6   | C36  | 111.9(3)   | N9   | S7   | C55              | 105.52(19) |
| C46  | N6   | C37  | 112.9(3)   | O17  | S8   | O18              | 116.80(18) |
| S4   | N5   | Co2  | 131.8(2)   | O17  | S8   | N11              | 113.3(2)   |
| C35  | N5   | Co2  | 113.8(3)   | O17  | S8   | C66              | 106.9(2)   |
| C35  | N5   | S4   | 113.5(3)   | O18  | S8   | N11              | 106.34(18) |
| S6   | N8   | Co2  | 131.4(2)   | O18  | S8   | C66              | 106.7(2)   |
| C47  | N8   | Co2  | 114.2(3)   | N11  | S8   | C66              | 106.26(19) |
| C47  | N8   | S6   | 112.5(3)   | O19  | S9   | N12              | 107.45(18) |
| S5   | N7   | Co2  | 129.6(2)   | O19  | S9   | C75              | 105.82(19) |
| C38  | N7   | Co2  | 113.9(3)   | O20  | S9   | O19              | 115.83(18) |
| C38  | N7   | S5   | 115.9(3)   | O20  | S9   | N12              | 113.89(19) |
| N8   | C47  | C46  | 108.3(4)   | O20  | S9   | C75              | 104.69(19) |
| C44  | C43  | C42  | 122.8(4)   | N12  | S9   | C75              | 108.6(2)   |
| C42  | C41  | C40  | 120.6(5)   | S7   | O15  | Sr2 <sup>1</sup> | 150.26(17) |
| C50  | C51  | C54  | 120.9(4)   | S9   | O20  | Sr1              | 164.3(2)   |
| C52  | C51  | C50  | 118.4(4)   | S7   | N9   | Co3              | 125.6(2)   |
| C52  | C51  | C54  | 120.6(4)   | C62  | N9   | Co3              | 116.1(3)   |
| C29  | C28  | S4   | 119.1(3)   | C62  | N9   | S7               | 115.3(3)   |
| C29  | C28  | C33  | 120.2(4)   | S8   | N11  | Co3              | 128.0(2)   |
| C33  | C28  | S4   | 120.5(3)   | C65  | N11  | Co3              | 114.0(3)   |
| C49  | C48  | S6   | 118.6(3)   | C65  | N11  | S8               | 118.0(3)   |
| C49  | C48  | C53  | 120.1(4)   | S9   | N12  | Co3              | 129.2(2)   |
| C53  | C48  | S6   | 121.3(3)   | C74  | N12  | Co3              | 113.3(3)   |
| C43  | C42  | C41  | 117.7(5)   | C74  | N12  | S9               | 117.2(3)   |
| C43  | C42  | C45  | 121.5(5)   | C63  | N10  | Co3              | 106.0(3)   |
| C41  | C42  | C45  | 120.8(5)   | C63  | N10  | C64              | 110.9(4)   |
| N6   | C36  | C35  | 111.0(3)   | C64  | N10  | Co3              | 105.7(3)   |
| C30  | C29  | C28  | 119.0(4)   | C73  | N10  | Co3              | 106.2(3)   |
| N5   | C35  | C36  | 107.1(3)   | C73  | N10  | C63              | 114.2(4)   |
| C51  | C50  | C49  | 121.0(4)   | C73  | N10  | C64              | 113.1(4)   |
| C48  | C49  | C50  | 119.5(4)   | N9   | C62  | C63              | 107.0(4)   |
| N7   | C38  | C37  | 108.0(3)   | C77  | C78  | C79              | 117.2(4)   |
| C30  | C31  | C32  | 117.7(5)   | C77  | C78  | C81              | 122.4(4)   |
| C30  | C31  | C34  | 121.8(5)   | C79  | C78  | C81              | 120.4(4)   |
| C32  | C31  | C34  | 120.5(5)   | C76  | C77  | C78              | 121.5(4)   |
| C52  | C53  | C48  | 119.4(4)   | C77  | C76  | C75              | 120.6(4)   |
| C39  | C40  | C41  | 120.0(5)   | N10  | C63  | C62              | 112.4(4)   |
| C31  | C30  | C29  | 122.1(5)   | N10  | C64  | C65              | 111.6(4)   |
| C43  | C44  | C39  | 119.2(4)   | N11  | C65  | C64              | 109.2(4)   |
| N6   | C37  | C38  | 110.0(4)   | N12  | C74  | C73              | 106.5(3)   |
| C33  | C32  | C31  | 122.2(5)   | N10  | C73  | C74              | 111.7(4)   |
| N6   | C46  | C47  | 111.6(4)   | C56  | C55  | S7               | 121.2(3)   |
| C40  | C39  | S5   | 119.7(4)   | C56  | C55  | C60              | 120.6(4)   |
| C44  | C39  | S5   | 120.5(3)   | C60  | C55  | S7               | 118.1(3)   |
| C44  | C39  | C40  | 119.7(4)   | C55  | C56  | C57              | 119.6(4)   |
| C32  | C33  | C28  | 118.7(4)   | C56  | C57  | C58              | 121.6(4)   |
| C51  | C52  | C53  | 121.5(4)   | C57  | C58  | C59              | 117.6(4)   |
| N9   | Co3  | N11  | 113.71(15) | C57  | C58  | C61              | 121.9(5)   |
| N9   | Co3  | N12  | 124.13(15) | C59  | C58  | C61              | 120.5(4)   |
| N9   | Co3  | N10  | 83.14(15)  | C60  | C59  | C58              | 121.8(4)   |
| N11  | Co3  | N10  | 84.54(14)  | C59  | C60  | C55              | 118.7(4)   |
| N12  | Co3  | N11  | 118.92(15) | C76  | C75  | S9               | 119.7(3)   |
| N12  | Co3  | N10  | 84.39(14)  | C76  | C75  | C80              | 119.3(4)   |
| O15  | S7   | N9   | 106.70(18) | C80  | C75  | S9               | 121.0(3)   |
| O15  | S7   | C55  | 108.31(19) | C79  | C80  | C75              | 119.3(4)   |
| O16  | S7   | O15  | 116.30(18) | C80  | C79  | C78              | 122.0(4)   |

| Atom | Atom | Atom | Angle/°    | Atom                    | Atom | Atom | Angle/°  |
|------|------|------|------------|-------------------------|------|------|----------|
| C67  | C66  | S8   | 121.1(3)   | C90                     | N14  | Co4  | 105.1(3) |
| C67  | C66  | C71  | 120.2(4)   | C90                     | N14  | C91  | 113.1(4) |
| C71  | C66  | S8   | 118.5(4)   | C90                     | N14  | C100 | 113.6(4) |
| C68  | C67  | C66  | 119.5(4)   | C91                     | N14  | Co4  | 105.9(3) |
| C67  | C68  | C69  | 121.5(5)   | C100                    | N14  | Co4  | 105.8(3) |
| C68  | C69  | C72  | 121.6(5)   | C100                    | N14  | C91  | 112.4(4) |
| C70  | C69  | C68  | 118.5(5)   | N13                     | C89  | C90  | 107.4(3) |
| C70  | C69  | C72  | 119.9(5)   | N14                     | C90  | C89  | 112.4(4) |
| C71  | C70  | C69  | 120.7(4)   | N14                     | C91  | C92  | 112.0(4) |
| C70  | C71  | C66  | 119.5(4)   | N15                     | C92  | C91  | 108.4(3) |
| N13  | Co4  | N15  | 122.49(15) | N16                     | C101 | C100 | 108.5(4) |
| N13  | Co4  | N16  | 116.75(15) | N14                     | C100 | C101 | 112.5(4) |
| N13  | Co4  | N14  | 84.30(14)  | C83                     | C82  | S10  | 118.6(3) |
| N15  | Co4  | N14  | 84.18(13)  | C87                     | C82  | S10  | 121.0(3) |
| N16  | Co4  | N15  | 117.80(15) | C87                     | C82  | C83  | 120.3(4) |
| N16  | Co4  | N14  | 84.33(14)  | C84                     | C83  | C82  | 119.2(4) |
| O21  | S10  | N13  | 105.75(17) | C83                     | C84  | C85  | 121.2(4) |
| O21  | S10  | C82  | 108.48(18) | C84                     | C85  | C88  | 120.3(4) |
| O22  | S10  | O21  | 116.18(17) | C86                     | C85  | C84  | 118.7(4) |
| O22  | S10  | N13  | 114.07(18) | C86                     | C85  | C88  | 120.9(4) |
| O22  | S10  | C82  | 106.20(18) | C85                     | C86  | C87  | 120.6(4) |
| N13  | S10  | C82  | 105.57(19) | C82                     | C87  | C86  | 119.9(4) |
| O23  | S11  | O24  | 114.78(17) | C103                    | C102 | S12  | 120.9(3) |
| O23  | S11  | N15  | 113.56(18) | C103                    | C102 | C107 | 120.3(4) |
| O23  | S11  | C93  | 106.30(18) | C107                    | C102 | S12  | 118.7(3) |
| O24  | S11  | N15  | 107.19(18) | C102                    | C103 | C104 | 120.5(4) |
| O24  | S11  | C93  | 105.99(18) | C103                    | C104 | C105 | 120.4(5) |
| N15  | S11  | C93  | 108.63(19) | C104                    | C105 | C108 | 121.2(5) |
| O25  | S12  | N16  | 105.87(18) | C106                    | C105 | C104 | 118.5(4) |
| O25  | S12  | C102 | 105.32(19) | C106                    | C105 | C108 | 120.3(5) |
| O26  | S12  | O25  | 117.47(18) | C105                    | C106 | C107 | 121.5(4) |
| O26  | S12  | N16  | 112.78(18) | C106                    | C107 | C102 | 118.8(4) |
| O26  | S12  | C102 | 106.44(19) | C94                     | C93  | S11  | 119.1(3) |
| N16  | S12  | C102 | 108.45(18) | C94                     | C93  | C98  | 119.2(4) |
| S10  | O21  | Sr1  | 149.47(16) | C98                     | C93  | S11  | 121.7(3) |
| S11  | O23  | Sr2  | 154.12(18) | C95                     | C94  | C93  | 120.5(4) |
| S12  | O25  | Sr1  | 173.32(19) | C94                     | C95  | C96  | 121.0(4) |
| S10  | N13  | Co4  | 124.40(19) | C95                     | C96  | C99  | 120.4(4) |
| C89  | N13  | Co4  | 115.2(3)   | C97                     | C96  | C95  | 117.8(4) |
| C89  | N13  | S10  | 118.0(3)   | C97                     | C96  | C99  | 121.8(4) |
| S11  | N15  | Co4  | 124.51(19) | C96                     | C97  | C98  | 122.3(4) |
| C92  | N15  | Co4  | 113.7(3)   | C97                     | C98  | C93  | 119.1(4) |
| C92  | N15  | S11  | 119.2(3)   | -----•                  |      |      |          |
| S12  | N16  | Co4  | 124.6(2)   | <sup>1</sup> +X,-1+Y,+Z |      |      |          |
| C101 | N16  | Co4  | 115.0(3)   |                         |      |      |          |
| C101 | N16  | S12  | 119.9(3)   |                         |      |      |          |

**Table S16:** Hydrogen Fractional Atomic Coordinates ( $\times 10^4$ ) and Equivalent Isotropic Displacement Parameters ( $\text{\AA}^2 \times 10^3$ ) for **CMW-03-086SRTS**.  $U_{eq}$  is defined as 1/3 of the trace of the orthogonalised  $U_{ij}$ .

| Atom | x    | y    | z    | $U_{eq}$ |
|------|------|------|------|----------|
| H22  | 1339 | 537  | 383  | 34       |
| H23  | 724  | 1384 | 105  | 38       |
| H8A  | 4081 | 242  | 1269 | 34       |
| H8B  | 4162 | 1139 | 1529 | 34       |
| H2   | 3586 | 893  | 2925 | 33       |
| H14  | 4469 | 4453 | 3537 | 41       |

| Atom | x    | y    | z    | $U_{eq}$ |
|------|------|------|------|----------|
| H3   | 4106 | 1275 | 3626 | 43       |
| H20A | 2437 | 1620 | 305  | 30       |
| H20B | 2815 | 908  | 383  | 30       |
| H13  | 3765 | 4299 | 3069 | 38       |
| H9A  | 3963 | 1356 | 636  | 33       |
| H9B  | 3530 | 763  | 641  | 33       |
| H16  | 4914 | 2400 | 2872 | 41       |
| H26  | 1926 | 2448 | 1202 | 33       |
| H10A | 3761 | 2952 | 804  | 36       |
| H10B | 4018 | 2448 | 1279 | 36       |
| H17  | 4205 | 2208 | 2427 | 35       |
| H18A | 5242 | 4078 | 3730 | 62       |
| H18B | 5460 | 3415 | 3367 | 62       |
| H18C | 5232 | 3116 | 3872 | 62       |
| H11A | 3706 | 3569 | 1647 | 37       |
| H11B | 3225 | 3430 | 1314 | 37       |
| H6   | 4536 | -599 | 2395 | 33       |
| H5   | 5047 | -223 | 3102 | 40       |
| H7A  | 5033 | 1406 | 3863 | 78       |
| H7B  | 5235 | 488  | 3893 | 78       |
| H7C  | 4817 | 724  | 4214 | 78       |
| H19A | 3205 | 2091 | 210  | 31       |
| H19B | 2945 | 2623 | 612  | 31       |
| H25  | 1318 | 3289 | 905  | 38       |
| H27A | 393  | 2751 | -7   | 64       |
| H27B | 659  | 3527 | 259  | 64       |
| H27C | 345  | 2969 | 590  | 64       |
| H47A | 1120 | 5845 | 3762 | 33       |
| H47B | 888  | 6550 | 3388 | 33       |
| H43  | 4121 | 6092 | 3665 | 37       |
| H41  | 4077 | 5014 | 5058 | 59       |
| H36A | 2320 | 7427 | 4630 | 31       |
| H36B | 1843 | 7905 | 4589 | 31       |
| H29  | 3353 | 7083 | 4078 | 35       |
| H35A | 1946 | 8399 | 3762 | 31       |
| H35B | 2416 | 8571 | 4111 | 31       |
| H50  | 128  | 6407 | 1412 | 36       |
| H49  | 602  | 5515 | 1934 | 31       |
| H38A | 2561 | 6102 | 4714 | 33       |
| H38B | 2326 | 5212 | 4747 | 33       |
| H53  | 1266 | 7494 | 2594 | 31       |
| H54A | -49  | 7780 | 1077 | 56       |
| H54B | 233  | 8558 | 1316 | 56       |
| H54C | -175 | 8190 | 1609 | 56       |
| H40  | 3334 | 4583 | 4809 | 49       |
| H30  | 4009 | 7324 | 4632 | 41       |
| H44  | 3385 | 5689 | 3414 | 30       |
| H37A | 1618 | 5739 | 4450 | 35       |
| H37B | 1820 | 6356 | 4900 | 35       |
| H32  | 4027 | 9687 | 4164 | 47       |
| H46A | 1341 | 7561 | 3787 | 32       |
| H46B | 1158 | 7037 | 4250 | 32       |
| H34A | 4406 | 9030 | 5129 | 88       |
| H34B | 4723 | 8992 | 4662 | 88       |
| H34C | 4622 | 8169 | 4974 | 88       |
| H33  | 3378 | 9476 | 3599 | 35       |
| H52  | 773  | 8368 | 2095 | 33       |
| H45A | 4871 | 5486 | 4399 | 71       |

| Atom | x    | y     | z    | $U_{eq}$ |
|------|------|-------|------|----------|
| H45B | 4716 | 5886  | 4920 | 71       |
| H45C | 4708 | 6428  | 4401 | 71       |
| H62A | 3953 | -3691 | 1114 | 39       |
| H62B | 4132 | -3031 | 1552 | 39       |
| H77  | 1117 | -2843 | 245  | 35       |
| H76  | 1719 | -3033 | 872  | 35       |
| H63A | 3661 | -2029 | 1205 | 42       |
| H63B | 3845 | -2451 | 706  | 42       |
| H64A | 3448 | -3695 | 404  | 46       |
| H64B | 3194 | -3032 | 18   | 46       |
| H65A | 2496 | -3530 | 151  | 34       |
| H65B | 2797 | -4345 | 98   | 34       |
| H74A | 2999 | -1316 | 1347 | 33       |
| H74B | 2506 | -1186 | 1035 | 33       |
| H73A | 2651 | -2146 | 409  | 41       |
| H73B | 3098 | -1584 | 481  | 41       |
| H56  | 4560 | -4497 | 2606 | 31       |
| H57  | 5073 | -3748 | 3160 | 37       |
| H59  | 4189 | -1853 | 3136 | 34       |
| H60  | 3681 | -2575 | 2554 | 32       |
| H61A | 5165 | -2593 | 3832 | 62       |
| H61B | 4855 | -1788 | 3727 | 62       |
| H61C | 5249 | -1983 | 3363 | 62       |
| H80  | 1506 | -764  | 1455 | 30       |
| H79  | 897  | -587  | 829  | 35       |
| H81A | 636  | -1158 | -194 | 64       |
| H81B | 288  | -1343 | 229  | 64       |
| H81C | 464  | -2082 | -111 | 64       |
| H67  | 1552 | -4753 | 1262 | 33       |
| H68  | 832  | -4558 | 842  | 41       |
| H70  | 1333 | -4709 | -558 | 35       |
| H71  | 2058 | -4945 | -141 | 31       |
| H72A | 413  | -4942 | -316 | 79       |
| H72B | 573  | -4034 | -462 | 79       |
| H72C | 350  | -4187 | 70   | 79       |
| H89A | 2487 | 1989  | 4700 | 27       |
| H89B | 2071 | 1348  | 4685 | 27       |
| H90A | 1734 | 2615  | 4756 | 47       |
| H90B | 2035 | 3028  | 4343 | 47       |
| H91A | 1275 | 3543  | 4046 | 52       |
| H91B | 1010 | 3010  | 3589 | 52       |
| H92A | 1439 | 3904  | 3167 | 28       |
| H92B | 1877 | 3764  | 3576 | 28       |
| H10C | 780  | 809   | 3833 | 29       |
| H10D | 712  | 1637  | 3492 | 29       |
| H10E | 916  | 2123  | 4315 | 52       |
| H10F | 1291 | 1418  | 4434 | 52       |
| H83  | 3065 | 2455  | 3738 | 28       |
| H84  | 3721 | 3160  | 4055 | 35       |
| H86  | 4098 | 1244  | 5000 | 34       |
| H87  | 3437 | 533   | 4688 | 29       |
| H88A | 4655 | 2570  | 4526 | 59       |
| H88B | 4504 | 2571  | 5105 | 59       |
| H88C | 4359 | 3318  | 4718 | 59       |
| H103 | 319  | -192  | 2888 | 33       |
| H104 | -195 | -79   | 2152 | 41       |
| H106 | 804  | 803   | 1340 | 37       |
| H107 | 1325 | 684   | 2081 | 30       |

| <b>Atom</b> | <b>x</b> | <b>y</b> | <b>z</b> | <b><math>U_{eq}</math></b> |
|-------------|----------|----------|----------|----------------------------|
| H10G        | -352     | 152      | 1240     | 79                         |
| H10H        | 66       | 192      | 891      | 79                         |
| H10I        | -136     | 1025     | 1111     | 79                         |
| H94         | 920      | 2073     | 2632     | 28                         |
| H95         | 167      | 2149     | 2288     | 31                         |
| H97         | 456      | 4149     | 1455     | 30                         |
| H98         | 1211     | 4098     | 1802     | 28                         |
| H99A        | -285     | 2727     | 1305     | 47                         |
| H99B        | -316     | 3696     | 1418     | 47                         |
| H99C        | -454     | 3043     | 1840     | 47                         |
| H1A         | 2847     | 1671     | 2555     | 26                         |
| H1B         | 2400     | 1677     | 2189     | 26                         |
| H8C         | 2684     | 6723     | 2842     | 26                         |
| H8D         | 2248(8)  | 6512(13) | 2490(11) | 26                         |

Submitted by: **Christian Wallen**  
Emory University

Solved by: **John Bacsá**

Sample ID: **CMW-03-052**

## Crystal Data and Experimental

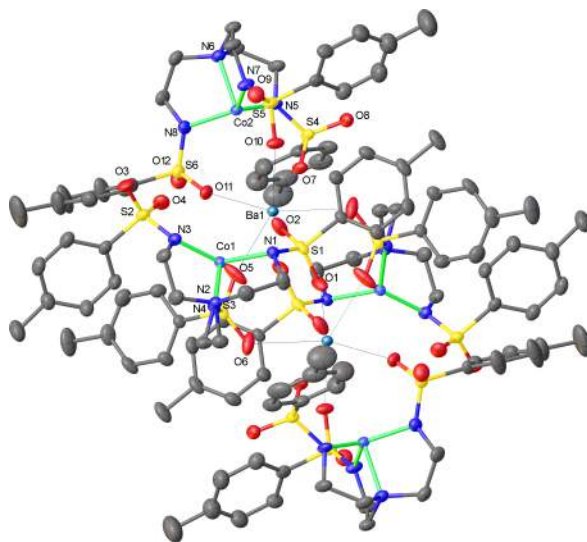

**Experimental.** Single violet prism-shaped crystals of (CMW-03-052) were recrystallised from a mixture of  $\text{CH}_2\text{Cl}_2$  and diethyl ether by vapor diffusion. A suitable crystal (0.48×0.35×0.27) was selected and mounted on a loop with paratone oil on a Bruker APEX-II CCD diffractometer. The crystal was cooled to  $T = 100(2)$  K during data collection. The structure was solved with the **ShelXT** (Sheldrick, 2015) structure solution program using combined Patterson and dual-space recycling methods and by using **Olex2** (Dolomanov et al., 2009) as the graphical interface. The crystal structure was refined with version of **ShelXL** (Sheldrick, 2008) using Least Squares minimisation.

**Crystal Data.**  $\text{C}_{112}\text{H}_{138}\text{Ba}_2\text{Co}_4\text{N}_{18}\text{O}_{24}\text{S}_{12}$ ,  $M_r = 3015.52$ , triclinic, P-1 (No. 2),  $a = 15.199(3)$  Å,  $b = 15.322(3)$  Å,  $c = 16.472(4)$  Å,  $\alpha = 116.330(3)^\circ$ ,  $\beta = 93.430(3)^\circ$ ,  $\gamma = 102.116(3)^\circ$ ,  $V = 3309.8(12)$  Å<sup>3</sup>,  $T = 100(2)$  K,  $Z = 1$ ,  $Z' = 0.5$ ,  $\mu(\text{MoK}_\alpha) = 1.336$ , 60531 reflections measured, 20361 unique ( $R_{\text{int}} = 0.0387$ ) which were used in all calculations. The final  $wR_2$  was 0.1429 (all data) and  $R_1$  was 0.0502 ( $I >$

$2\sigma(I)$ ).

| Compound                              | CMW-03-052                                                                                  |
|---------------------------------------|---------------------------------------------------------------------------------------------|
| Formula                               | $\text{C}_{112}\text{H}_{138}\text{Ba}_2\text{Co}_4\text{N}_{18}\text{O}_{24}\text{S}_{12}$ |
| $D_{\text{calc.}} / \text{g cm}^{-3}$ | 1.513                                                                                       |
| $\mu / \text{mm}^{-1}$                | 1.336                                                                                       |
| Formula Weight                        | 3015.52                                                                                     |
| Colour                                | violet                                                                                      |
| Shape                                 | prism                                                                                       |
| Max Size/mm                           | 0.48                                                                                        |
| Mid Size/mm                           | 0.35                                                                                        |
| Min Size/mm                           | 0.27                                                                                        |
| $T/\text{K}$                          | 100(2)                                                                                      |
| Crystal System                        | triclinic                                                                                   |
| Space Group                           | P-1                                                                                         |
| $a/\text{Å}$                          | 15.199(3)                                                                                   |
| $b/\text{Å}$                          | 15.322(3)                                                                                   |
| $c/\text{Å}$                          | 16.472(4)                                                                                   |
| $\alpha/^\circ$                       | 116.330(3)                                                                                  |
| $\beta/^\circ$                        | 93.430(3)                                                                                   |
| $\gamma/^\circ$                       | 102.116(3)                                                                                  |
| $V/\text{Å}^3$                        | 3309.8(12)                                                                                  |
| $Z$                                   | 1                                                                                           |
| $Z'$                                  | 0.5                                                                                         |
| $\Theta_{\text{min}}/^\circ$          | 1.794                                                                                       |
| $\Theta_{\text{max}}/^\circ$          | 30.783                                                                                      |
| Measured Refl.                        | 60531                                                                                       |
| Independent Refl.                     | 20361                                                                                       |
| $I > 2\sigma(I)$                      | 16303                                                                                       |
| $R_{\text{int}}$                      | 0.0387                                                                                      |
| Parameters                            | 846                                                                                         |
| Restraints                            | 164                                                                                         |
| Largest Peak                          | 2.478                                                                                       |
| Deepest Hole                          | -0.896                                                                                      |
| GooF                                  | 1.071                                                                                       |
| $wR_2$ (all data)                     | 0.1429                                                                                      |
| $wR_2$                                | 0.1293                                                                                      |
| $R_1$ (all data)                      | 0.0680                                                                                      |
| $R_1$                                 | 0.0502                                                                                      |
| CCDC #                                | 1434432                                                                                     |



## Structure Quality Indicators

|                     |       |        |            |      |                  |       |          |       |
|---------------------|-------|--------|------------|------|------------------|-------|----------|-------|
| <b>Reflections:</b> | d min | 0.69   | $l/\sigma$ | 15.4 | R <sub>int</sub> | 3.87% | complete | 98%   |
| <b>Refinement:</b>  | Shift | -0.030 | Max Peak   | 2.5  | Min Peak         | -0.9  | Goof     | 1.071 |

A violet prism-shaped crystal with dimensions 0.48×0.35×0.27 mm was mounted on a loop with paratone oil. X-ray diffraction data were collected using a Bruker APEX-II CCD diffractometer equipped with an Oxford Cryosystems low-temperature apparatus operating at  $T = 100(2)$  K.

Data were measured using  $\omega$  scans with MoK $\alpha$  radiation (fine-focus sealed tube, 45 kV, 35 mA). The total number of runs and images was based on the strategy calculation from the program **APEX2** (Bruker, 2014). The maximum resolution achieved was  $\Theta = 30.783^\circ$ .

Unit cell indexing was performed by using the **APEX2** (Bruker) software and refined using **SAINT** (Bruker, V8.34A, 2013) on 9976 reflections, 16% of the observed reflections. Data reduction, scaling and absorption corrections were performed using **SAINT** (Bruker, V8.34A, 2013) and **SADABS-2014/2** (Bruker, 2014) was used for absorption correction.  $wR_2(\text{int})$  was 0.0844 before and 0.0456 after correction. The ratio of minimum to maximum transmission is 0.8376. The  $\lambda/2$  correction factor is Not present. The software corrects for Lorentz polarisation. The final completeness is 99.6% out to  $30.783^\circ$  in  $\Theta$ . The absorption coefficient ( $\mu$ ) of this material is 1.336 mm<sup>-1</sup> and the minimum and maximum transmissions are 0.6249 and 0.7461.

The structure was solved in the space group P1 with the **ShelXT** (Sheldrick, 2015) structure solution program using combined Patterson and dual-space recycling methods. The space group P-1 (# 2) was determined by the **ShelXT** (Sheldrick, 2015) structure solution program. The crystal structure was refined by Least Squares using version of **ShelXL** (Sheldrick, 2008). All non-hydrogen atoms were refined anisotropically. Hydrogen atom positions were calculated geometrically and refined using the riding model.

The value of Z' is 0.5. This means that only half of the formula unit is present in the asymmetric unit, with the other half consisting of symmetry equivalent atoms.

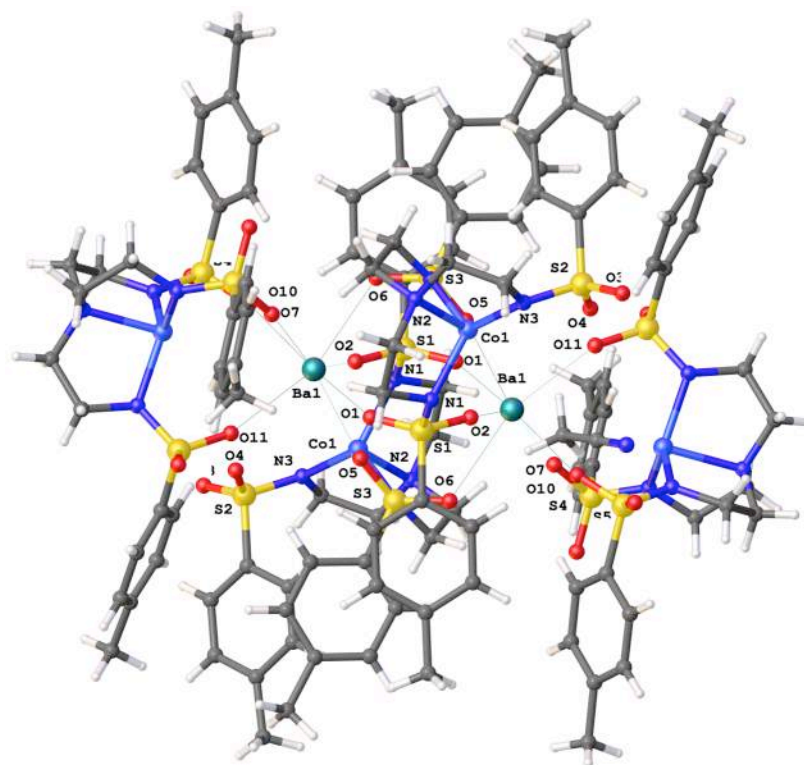

Figure S16:

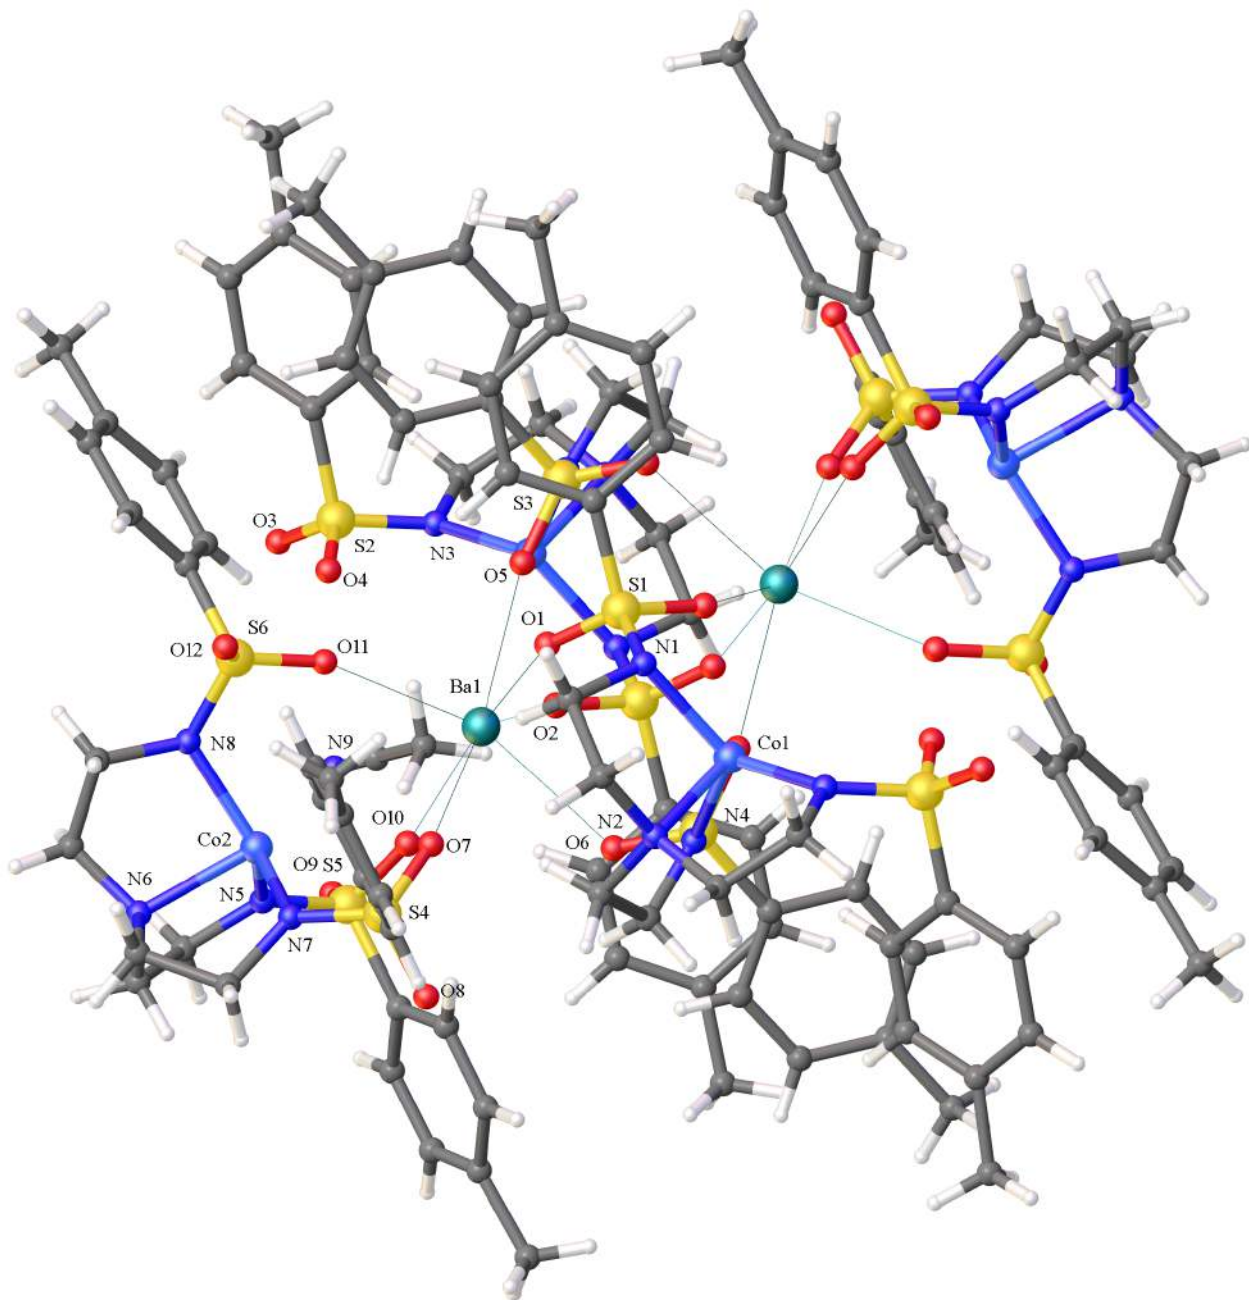

**Figure S17:**

## Data Plots: Diffraction Data

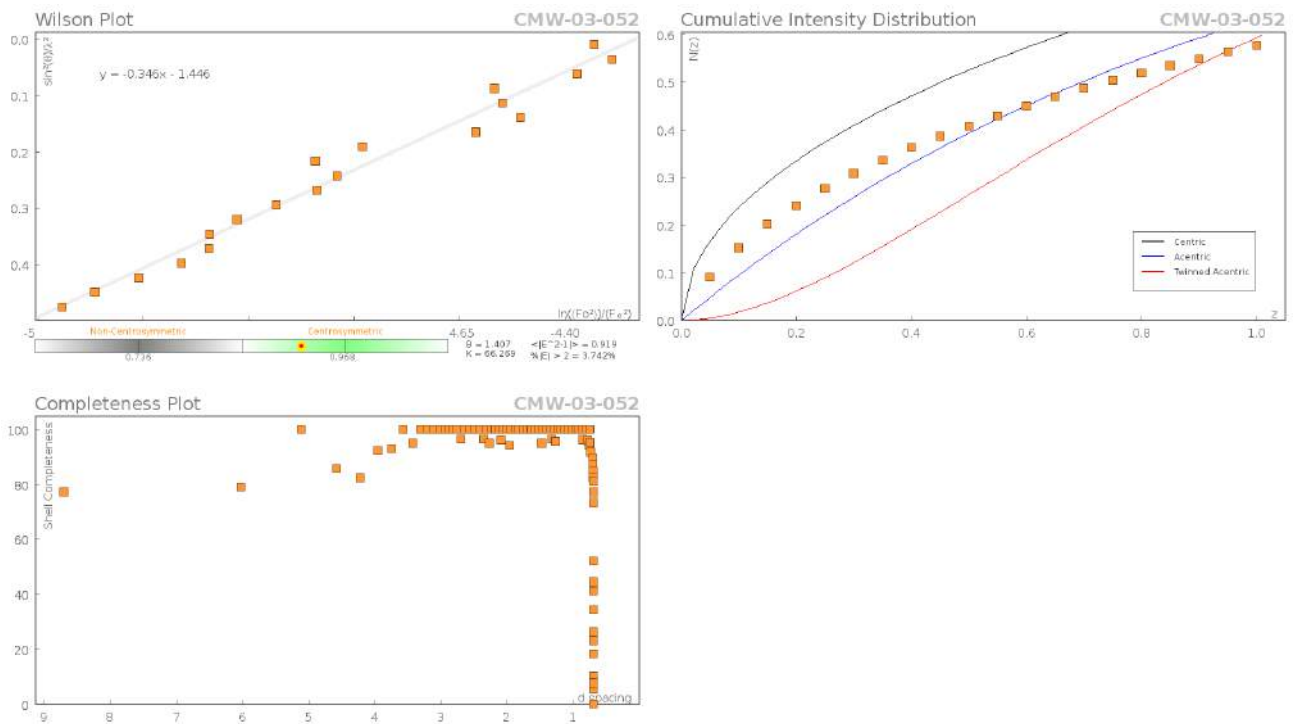

## Data Plots: Refinement and Data

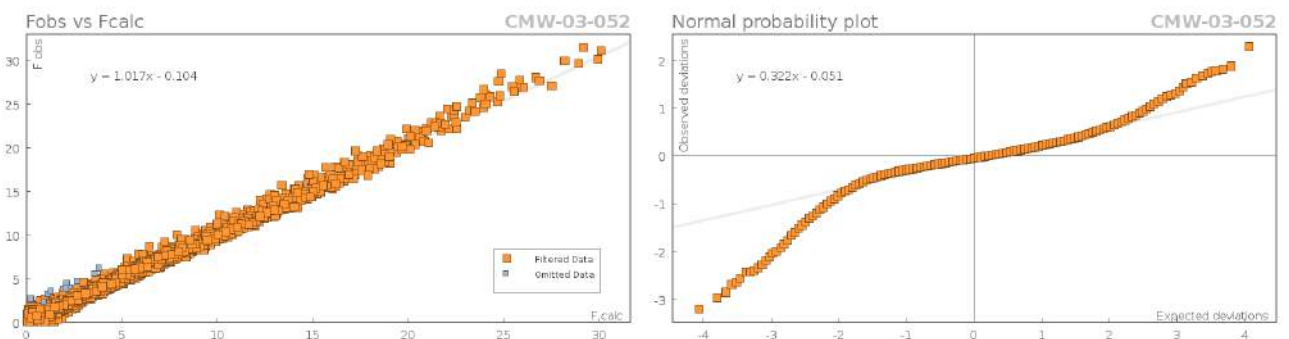

## Reflection Statistics

|                                          |                           |                                          |                 |
|------------------------------------------|---------------------------|------------------------------------------|-----------------|
| Total reflections (after filtering)      | 60588                     | Unique reflections                       | 20361           |
| Completeness                             | 0.984                     | Mean $I/\sigma$                          | 15.43           |
| hkls <sub>max</sub> >max</sub> collected | (21, 21, 22)              | hkls <sub>min</sub> >min</sub> collected | (-21, -22, -23) |
| hkl <sub>max</sub> used                  | (21, 19, 23)              | hkl <sub>min</sub> used                  | (-21, -22, 0)   |
| Lim $d_{max}$ collected                  | 100.0                     | Lim $d_{min}$ collected                  | 0.36            |
| $d_{max}$ used                           | 11.44                     | $d_{min}$ used                           | 0.69            |
| Friedel pairs                            | 18091                     | Friedel pairs merged                     | 1               |
| Inconsistent equivalents                 | 0                         | $R_{int}$                                | 0.0387          |
| $R_{sigma}$                              | 0.0452                    | Intensity transformed                    | 0               |
| Omitted reflections                      | 0                         | Omitted by user (OMIT hkl)               | 57              |
| Multiplicity                             | (20254, 14798, 2918, 496) | Maximum multiplicity                     | 8               |
| Removed systematic absences              | 0                         | Filtered off (Shel/OMIT)                 | 0               |

## Images of the Crystal on the Diffractometer

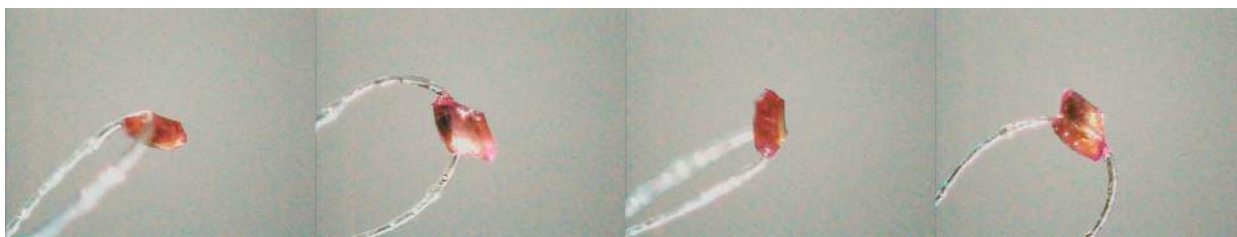

**Table S17:** Fractional Atomic Coordinates ( $\times 10^4$ ) and Equivalent Isotropic Displacement Parameters ( $\text{\AA}^2 \times 10^3$ ) for **CMW-03-052**.  $U_{eq}$  is defined as  $1/3$  of the trace of the orthogonalised  $U_{ij}$ .

| Atom | x           | y          | z          | $U_{eq}$  |
|------|-------------|------------|------------|-----------|
| Ba1  | -562.3(2)   | 1178.1(2)  | 6383.4(2)  | 17.06(5)  |
| Co1  | 2631.4(3)   | 2175.4(3)  | 6388.8(3)  | 17.94(9)  |
| Co2  | -1568.7(3)  | 2952.8(3)  | 8438.1(3)  | 17.82(9)  |
| S1   | 1212.2(5)   | 1829.1(6)  | 4931.2(6)  | 22.28(16) |
| S2   | 3279.5(6)   | 3621.6(7)  | 8498.1(6)  | 24.98(17) |
| S3   | 1635.9(5)   | -22.7(7)   | 6101.6(6)  | 23.87(17) |
| S4   | -3168.2(5)  | 1294.4(6)  | 6911.5(6)  | 22.77(16) |
| S5   | -631.8(6)   | 4139.0(6)  | 7484.2(6)  | 23.02(16) |
| S6   | -677.6(6)   | 1674.4(7)  | 9019.0(6)  | 24.28(16) |
| O1   | 1085.9(19)  | 817(2)     | 4211(2)    | 37.5(7)   |
| O2   | 816.4(19)   | 1957(2)    | 5753(2)    | 35.9(6)   |
| O3   | 3685(2)     | 4685(2)    | 9090.5(19) | 36.5(6)   |
| O4   | 2302.8(18)  | 3246(2)    | 8419.9(19) | 33.6(6)   |
| O5   | 912.1(18)   | 471(3)     | 6323(3)    | 47.1(9)   |
| O6   | 1427(2)     | -960(2)    | 5239.6(19) | 40.3(7)   |
| O7   | -2339.5(16) | 1026.8(19) | 6581.9(17) | 26.6(5)   |
| O8   | -3792.0(18) | 1393(2)    | 6283.6(18) | 31.0(6)   |
| O9   | 165.9(19)   | 4962(2)    | 7717(2)    | 32.0(6)   |
| O10  | -524.1(19)  | 3123.7(19) | 6964.4(18) | 28.8(5)   |
| O11  | -451.5(19)  | 1429(2)    | 8107.3(17) | 29.2(5)   |
| O12  | -1332(2)    | 884(2)     | 9086(2)    | 35.9(6)   |
| N1   | 2241.4(18)  | 2408(2)    | 5326.3(19) | 20.5(5)   |
| N2   | 3847.5(18)  | 2056(2)    | 5829.9(19) | 21.2(5)   |
| N3   | 3458.5(18)  | 3265(2)    | 7479.3(19) | 22.0(5)   |
| N4   | 2502.8(18)  | 772(2)     | 6136(2)    | 20.2(5)   |
| N5   | -2835.3(19) | 2249(2)    | 7879(2)    | 24.0(6)   |
| N6   | -2112.2(19) | 3903(2)    | 9507.0(19) | 22.8(5)   |
| N7   | -1046(2)    | 4153(2)    | 8335(2)    | 26.3(6)   |
| N8   | -953(2)     | 2702(2)    | 9354(2)    | 25.7(6)   |
| C1   | 2891(2)     | 2224(3)    | 4667(3)    | 30.8(8)   |
| C2   | 3847(3)     | 2490(3)    | 5196(3)    | 32.0(8)   |
| C3   | 4620(2)     | 2636(3)    | 6624(3)    | 31.9(8)   |
| C4   | 4409(2)     | 3552(3)    | 7359(2)    | 27.2(7)   |
| C5   | 3844(2)     | 2976(3)    | 8947(2)    | 24.2(6)   |
| C6   | 3676(2)     | 1933(3)    | 8435(2)    | 27.4(7)   |
| C7   | 4109(3)     | 1408(3)    | 8750(3)    | 30.9(8)   |
| C8   | 4719(3)     | 1916(3)    | 9589(3)    | 33.6(8)   |
| C9   | 4879(3)     | 2960(3)    | 10093(3)   | 32.2(8)   |
| C10  | 4448(3)     | 3493(3)    | 9777(3)    | 30.7(8)   |
| C11  | 5213(4)     | 1330(4)    | 9907(4)    | 50.4(12)  |
| C12  | 3809(3)     | 964(3)     | 5362(3)    | 29.3(7)   |
| C13  | 3321(2)     | 418(3)     | 5844(3)    | 26.2(7)   |
| C14  | 1854(2)     | -357(2)    | 6975(2)    | 20.7(6)   |
| C15  | 2307(2)     | -1094(3)   | 6832(3)    | 26.8(7)   |
| C16  | 2535(3)     | -1281(3)   | 7567(3)    | 33.4(8)   |
| C17  | 2301(3)     | -752(4)    | 8420(3)    | 37.5(9)   |
| C18  | 1825(3)     | -36(3)     | 8530(3)    | 36.4(9)   |

| Atom | x         | y        | z        | $U_{eq}$ |
|------|-----------|----------|----------|----------|
| C19  | 1608(3)   | 169(3)   | 7823(3)  | 29.7(7)  |
| C20  | 2589(4)   | -921(5)  | 9219(4)  | 60.2(16) |
| C21  | 635(2)    | 2411(3)  | 4437(2)  | 21.4(6)  |
| C22  | 278(3)    | 3185(3)  | 5019(3)  | 27.8(7)  |
| C23  | -249(3)   | 3596(3)  | 4647(3)  | 31.4(8)  |
| C24  | -427(2)   | 3252(3)  | 3698(3)  | 31.4(8)  |
| C25  | -54(3)    | 2486(3)  | 3134(3)  | 32.3(8)  |
| C26  | 471(3)    | 2058(3)  | 3494(3)  | 28.8(7)  |
| C27  | -1027(3)  | 3687(4)  | 3306(4)  | 43.9(11) |
| C28  | -3768(2)  | 291(3)   | 7093(3)  | 28.4(7)  |
| C29  | -4663(2)  | -213(3)  | 6670(3)  | 34.9(9)  |
| C30  | -5106(3)  | -1027(4) | 6812(4)  | 47.7(11) |
| C31  | -4661(4)  | -1310(4) | 7375(4)  | 50.9(12) |
| C32  | -3773(4)  | -783(4)  | 7799(4)  | 53.7(12) |
| C33  | -3320(3)  | 23(3)    | 7669(3)  | 40.6(9)  |
| C34  | -5129(5)  | -2208(5) | 7498(6)  | 77(2)    |
| C35  | -3502(2)  | 2756(3)  | 8370(3)  | 30.1(8)  |
| C36  | -3078(2)  | 3357(3)  | 9388(3)  | 29.1(7)  |
| C37  | -2037(3)  | 4842(3)  | 9420(3)  | 27.9(7)  |
| C38  | -1161(3)  | 5099(3)  | 9062(3)  | 28.0(7)  |
| C46  | -1545(3)  | 4084(3)  | 10358(2) | 29.2(7)  |
| C47  | -1296(3)  | 3112(3)  | 10233(2) | 28.9(7)  |
| C48  | 346(3)    | 1905(3)  | 9741(2)  | 26.7(7)  |
| C49  | 1167(3)   | 2421(3)  | 9646(3)  | 27.4(7)  |
| C50  | 1970(3)   | 2641(4)  | 10229(3) | 39.0(9)  |
| C51  | 1956(3)   | 2358(5)  | 10918(4) | 56.3(14) |
| C52  | 1141(4)   | 1820(6)  | 10997(4) | 70(2)    |
| C53  | 323(3)    | 1578(5)  | 10405(4) | 51.7(13) |
| C54  | 2844(4)   | 2650(8)  | 11573(6) | 96(3)    |
| C39A | -1523(6)  | 4263(8)  | 6832(6)  | 23.3(14) |
| C40A | -2277(6)  | 3465(7)  | 6274(5)  | 35.2(16) |
| C41A | -2926(6)  | 3630(9)  | 5765(5)  | 49(2)    |
| C42A | -2839(7)  | 4568(10) | 5800(7)  | 54(3)    |
| C43A | -2080(9)  | 5349(9)  | 6361(9)  | 46(2)    |
| C44A | -1428(7)  | 5211(8)  | 6873(9)  | 30.8(18) |
| C45A | -3557(11) | 4742(15) | 5235(11) | 85(5)    |
| C39B | -1414(4)  | 4269(5)  | 6729(5)  | 23.1(12) |
| C40B | -2132(5)  | 3431(5)  | 6160(5)  | 34.4(14) |
| C41B | -2764(5)  | 3524(7)  | 5578(5)  | 49(2)    |
| C42B | -2696(6)  | 4430(7)  | 5552(6)  | 53(2)    |
| C43B | -1973(6)  | 5253(6)  | 6127(6)  | 45(2)    |
| C44B | -1337(5)  | 5186(5)  | 6710(6)  | 29.7(15) |
| C45B | -3366(9)  | 4510(11) | 4871(10) | 84(5)    |
| N9   | 3155(4)   | 6612(4)  | 8121(4)  | 72.5(15) |
| C55  | 2742(3)   | 5777(4)  | 7677(3)  | 45.6(10) |
| C57  | 2197(4)   | 4746(4)  | 7159(3)  | 46.1(11) |

**Table S18:** Anisotropic Displacement Parameters ( $\times 10^4$ ) **CMW-03-052**. The anisotropic displacement factor exponent takes the form:  $-2\pi^2[h^2a^{*2} \times U_{11} + \dots + 2hka^* \times b^* \times U_{12}]$

| Atom | $U_{11}$  | $U_{22}$  | $U_{33}$  | $U_{23}$ | $U_{13}$ | $U_{12}$ |
|------|-----------|-----------|-----------|----------|----------|----------|
| Ba1  | 18.10(9)  | 17.12(9)  | 16.30(9)  | 7.01(7)  | 4.07(6)  | 6.87(6)  |
| Co1  | 17.02(18) | 17.7(2)   | 19.5(2)   | 9.20(16) | 2.58(15) | 4.47(15) |
| Co2  | 19.67(19) | 16.49(19) | 16.80(19) | 6.71(16) | 4.96(15) | 5.74(15) |
| S1   | 18.4(3)   | 23.6(4)   | 32.0(4)   | 19.0(3)  | 3.6(3)   | 6.1(3)   |
| S2   | 27.0(4)   | 23.2(4)   | 21.1(4)   | 5.5(3)   | 6.1(3)   | 10.1(3)  |
| S3   | 17.4(3)   | 27.6(4)   | 31.5(4)   | 20.7(4)  | -2.0(3)  | 1.5(3)   |
| S4   | 17.5(3)   | 21.3(4)   | 22.6(4)   | 3.5(3)   | 3.6(3)   | 7.0(3)   |

| Atom | $U_{11}$ | $U_{22}$ | $U_{33}$ | $U_{23}$ | $U_{13}$  | $U_{12}$  |
|------|----------|----------|----------|----------|-----------|-----------|
| S5   | 31.3(4)  | 16.5(3)  | 22.9(4)  | 9.4(3)   | 10.5(3)   | 7.6(3)    |
| S6   | 29.8(4)  | 26.3(4)  | 20.1(4)  | 13.1(3)  | 5.3(3)    | 8.3(3)    |
| O1   | 33.6(14) | 18.5(12) | 49.8(17) | 9.6(12)  | -11.6(12) | 5.7(10)   |
| O2   | 29.0(13) | 55.4(18) | 46.4(17) | 40.2(15) | 14.1(12)  | 17.3(12)  |
| O3   | 47.4(16) | 22.4(13) | 29.2(14) | 1.7(11)  | 4.5(12)   | 13.2(12)  |
| O4   | 25.9(12) | 42.9(16) | 33.2(14) | 15.1(12) | 11.4(11)  | 15.8(11)  |
| O5   | 19.2(12) | 59(2)    | 99(3)    | 65(2)    | 17.7(14)  | 17.0(13)  |
| O6   | 46.1(16) | 39.3(16) | 26.0(13) | 19.4(12) | -10.2(12) | -12.4(13) |
| O7   | 19.7(11) | 26.6(12) | 26.3(12) | 4.8(10)  | 6.5(9)    | 8.4(9)    |
| O8   | 26.6(12) | 31.8(14) | 27.9(13) | 7.8(11)  | 0(1)      | 10(1)     |
| O9   | 33.6(13) | 27.7(13) | 35.9(14) | 18.2(12) | 7.8(11)   | 2.2(11)   |
| O10  | 42.9(15) | 20.4(12) | 29.8(13) | 12.9(10) | 18.5(11)  | 15.5(11)  |
| O11  | 41.7(14) | 31.4(13) | 16.9(11) | 11.3(10) | 5.8(10)   | 14.2(11)  |
| O12  | 38.2(15) | 35.6(15) | 36.4(15) | 21.5(13) | 5.2(12)   | 4.6(12)   |
| N1   | 21.2(12) | 20.6(13) | 20.9(13) | 10.5(11) | 3.2(10)   | 6(1)      |
| N2   | 20.2(12) | 19.6(13) | 22.0(13) | 8.0(11)  | 4(1)      | 5.4(10)   |
| N3   | 19.8(12) | 20.6(13) | 22.4(13) | 7.5(11)  | 3.9(10)   | 4.5(10)   |
| N4   | 17.7(11) | 19.4(12) | 27.1(14) | 13.6(11) | 3.6(10)   | 6(1)      |
| N5   | 20.6(12) | 21.0(13) | 23.4(13) | 2.3(11)  | 6.4(10)   | 9.1(10)   |
| N6   | 23.5(13) | 21.2(13) | 20.8(13) | 7.1(11)  | 7.4(10)   | 5.4(10)   |
| N7   | 38.8(16) | 16.8(13) | 23.7(14) | 8.7(11)  | 15.1(12)  | 7.6(11)   |
| N8   | 30.8(14) | 29.6(15) | 21.4(13) | 13.7(12) | 7.5(11)   | 12.6(12)  |
| C1   | 23.4(16) | 45(2)    | 30.2(18) | 24.4(17) | 6.7(13)   | 6.5(15)   |
| C2   | 27.1(17) | 40(2)    | 36(2)    | 21.6(17) | 12.3(15)  | 10.8(15)  |
| C3   | 23.1(16) | 32.6(19) | 31.8(19) | 8.7(15)  | 2.9(14)   | 5.9(14)   |
| C4   | 22.7(15) | 23.5(16) | 25.7(16) | 5.1(13)  | 3.0(12)   | 1.7(12)   |
| C5   | 24.1(15) | 26.4(16) | 18.3(14) | 7.6(13)  | 5.9(12)   | 5.0(12)   |
| C6   | 27.6(16) | 26.3(17) | 23.1(16) | 9.6(14)  | -0.4(13)  | 3.1(13)   |
| C7   | 31.8(18) | 28.6(18) | 30.5(18) | 14.7(15) | -0.3(14)  | 4.0(14)   |
| C8   | 30.1(18) | 39(2)    | 35(2)    | 22.3(17) | 0.9(15)   | 5.9(15)   |
| C9   | 25.3(16) | 38(2)    | 25.8(17) | 13.5(16) | -0.8(13)  | -1.7(14)  |
| C10  | 28.4(17) | 31.4(19) | 23.9(17) | 8.4(14)  | 3.9(13)   | 2.1(14)   |
| C11  | 52(3)    | 49(3)    | 54(3)    | 31(2)    | -10(2)    | 10(2)     |
| C12  | 28.1(17) | 27.6(18) | 32.6(18) | 12.9(15) | 10.1(14)  | 9.3(14)   |
| C13  | 28.0(16) | 21.4(16) | 29.0(17) | 9.8(13)  | 10.2(13)  | 9.5(13)   |
| C14  | 20.1(13) | 22.3(15) | 23.3(15) | 14.1(12) | 3.8(11)   | 4.7(11)   |
| C15  | 25.3(15) | 30.4(18) | 33.7(18) | 21.0(15) | 10.2(13)  | 10.2(13)  |
| C16  | 27.3(17) | 41(2)    | 51(2)    | 36(2)    | 9.1(16)   | 14.3(15)  |
| C17  | 32.0(19) | 51(3)    | 38(2)    | 33(2)    | 5.3(16)   | 1.7(17)   |
| C18  | 38(2)    | 43(2)    | 28.6(19) | 17.4(17) | 11.8(16)  | 7.9(17)   |
| C19  | 33.7(18) | 27.2(18) | 30.7(18) | 13.5(15) | 11.3(14)  | 11.2(14)  |
| C20  | 52(3)    | 95(5)    | 56(3)    | 61(3)    | 4(2)      | 7(3)      |
| C21  | 19.7(13) | 22.4(15) | 27.9(16) | 16.7(13) | 4.0(12)   | 5.9(11)   |
| C22  | 33.7(18) | 29.2(18) | 27.6(17) | 17.3(15) | 7.6(14)   | 12.4(14)  |
| C23  | 33.8(18) | 31.0(19) | 40(2)    | 22.2(17) | 12.0(16)  | 16.0(15)  |
| C24  | 25.0(16) | 36(2)    | 48(2)    | 32.6(18) | 3.7(15)   | 6.4(14)   |
| C25  | 38.0(19) | 37(2)    | 28.0(18) | 21.4(16) | 2.1(15)   | 8.2(16)   |
| C26  | 31.3(17) | 30.3(18) | 30.5(18) | 18.9(15) | 7.0(14)   | 8.8(14)   |
| C27  | 38(2)    | 52(3)    | 62(3)    | 44(2)    | 1(2)      | 13.9(19)  |
| C28  | 27.1(16) | 18.4(15) | 31.7(18) | 4.6(13)  | 10.0(13)  | 5.0(12)   |
| C29  | 20.6(15) | 31.4(19) | 45(2)    | 10.1(17) | 11.2(15)  | 9.1(14)   |
| C30  | 28.3(19) | 37(2)    | 65(3)    | 13(2)    | 22.0(19)  | 4.1(16)   |
| C31  | 53(3)    | 35(2)    | 64(3)    | 21(2)    | 31(2)     | 10.0(19)  |
| C32  | 62(3)    | 40(2)    | 62(3)    | 28(2)    | 15(2)     | 8(2)      |
| C33  | 40(2)    | 32(2)    | 45(2)    | 16.8(18) | 3.2(18)   | 4.2(17)   |
| C34  | 81(4)    | 56(4)    | 98(5)    | 42(4)    | 35(4)     | 4(3)      |
| C35  | 23.7(16) | 25.6(17) | 32.5(18) | 4.7(14)  | 8.7(13)   | 9.0(13)   |
| C36  | 27.1(16) | 25.2(17) | 28.2(17) | 5.8(14)  | 13.6(13)  | 6.4(13)   |

| Atom | $U_{11}$ | $U_{22}$ | $U_{33}$ | $U_{23}$ | $U_{13}$ | $U_{12}$ |
|------|----------|----------|----------|----------|----------|----------|
| C37  | 33.3(18) | 21.5(16) | 25.8(17) | 6.5(13)  | 10.3(14) | 10.0(13) |
| C38  | 37.0(18) | 16.5(15) | 27.1(17) | 6.3(13)  | 13.2(14) | 7.0(13)  |
| C46  | 33.8(18) | 29.9(18) | 18.6(15) | 7.3(13)  | 6.5(13)  | 7.1(14)  |
| C47  | 36.0(18) | 32.5(19) | 20.6(16) | 14.2(14) | 10.4(13) | 8.4(15)  |
| C48  | 31.6(17) | 35.3(19) | 19.8(15) | 15.2(14) | 7.5(13)  | 15.6(14) |
| C49  | 32.6(17) | 24.6(16) | 25.5(16) | 10.3(14) | 8.7(14)  | 11.1(14) |
| C50  | 35(2)    | 43(2)    | 38(2)    | 14.9(19) | 6.8(17)  | 17.3(18) |
| C51  | 37(2)    | 101(5)   | 47(3)    | 43(3)    | 8(2)     | 32(3)    |
| C52  | 51(3)    | 142(6)   | 67(4)    | 82(4)    | 19(3)    | 43(4)    |
| C53  | 43(2)    | 94(4)    | 49(3)    | 56(3)    | 16(2)    | 24(3)    |
| C54  | 47(3)    | 174(9)   | 89(5)    | 81(6)    | -5(3)    | 35(4)    |
| C39A | 29(2)    | 24.6(18) | 21(2)    | 12.8(17) | 13(2)    | 8.9(17)  |
| C40A | 35(3)    | 34(2)    | 33(3)    | 14(2)    | 6(2)     | 4(2)     |
| C41A | 45(3)    | 54(3)    | 42(4)    | 20(3)    | -2(3)    | 11(3)    |
| C42A | 55(4)    | 61(3)    | 51(5)    | 29(3)    | 5(4)     | 19(3)    |
| C43A | 55(3)    | 49(3)    | 47(5)    | 28(3)    | 10(3)    | 23(2)    |
| C44A | 38(3)    | 29(2)    | 34(4)    | 19(2)    | 15(3)    | 13.1(18) |
| C45A | 82(7)    | 91(8)    | 87(10)   | 47(8)    | -16(7)   | 26(5)    |
| C39B | 30(2)    | 23.8(17) | 21(2)    | 13.3(16) | 12.8(18) | 8.2(16)  |
| C40B | 36(3)    | 33(2)    | 33(3)    | 15(2)    | 5(2)     | 5.6(19)  |
| C41B | 45(3)    | 54(3)    | 42(4)    | 19(3)    | -2(3)    | 10(3)    |
| C42B | 54(4)    | 62(3)    | 49(5)    | 30(4)    | 3(4)     | 21(3)    |
| C43B | 55(3)    | 49(3)    | 47(5)    | 30(3)    | 11(3)    | 22(2)    |
| C44B | 38(2)    | 28(2)    | 33(3)    | 20(2)    | 15(2)    | 12.7(18) |
| C45B | 81(7)    | 93(8)    | 85(9)    | 48(8)    | -17(7)   | 29(5)    |
| N9   | 72(3)    | 67(3)    | 68(3)    | 36(2)    | -11(2)   | -8(2)    |
| C55  | 41(2)    | 60(2)    | 41(2)    | 28.9(18) | 4.5(17)  | 12.6(17) |
| C57  | 54(2)    | 43(2)    | 41(2)    | 13.5(18) | 0.4(19)  | 28.9(18) |

**Table S19:** Bond Lengths in Å for **CMW-03-052**.

| Atom | Atom            | Length/Å | Atom | Atom             | Length/Å |
|------|-----------------|----------|------|------------------|----------|
| Ba1  | O1 <sup>1</sup> | 2.677(3) | S3   | C14              | 1.764(3) |
| Ba1  | O2              | 2.684(3) | S4   | O7               | 1.466(2) |
| Ba1  | O5              | 2.675(3) | S4   | O8               | 1.440(3) |
| Ba1  | O6 <sup>1</sup> | 2.755(3) | S4   | N5               | 1.568(3) |
| Ba1  | O7              | 2.714(2) | S4   | C28              | 1.772(4) |
| Ba1  | O10             | 2.683(3) | S5   | O9               | 1.443(3) |
| Ba1  | O11             | 2.681(3) | S5   | O10              | 1.457(3) |
| Co1  | N1              | 2.015(3) | S5   | N7               | 1.564(3) |
| Co1  | N2              | 2.120(3) | S5   | C39A             | 1.772(4) |
| Co1  | N3              | 1.945(3) | S5   | C39B             | 1.772(4) |
| Co1  | N4              | 1.963(3) | S6   | O11              | 1.459(3) |
| Co2  | N5              | 1.937(3) | S6   | O12              | 1.447(3) |
| Co2  | N6              | 2.075(3) | S6   | N8               | 1.579(3) |
| Co2  | N7              | 1.929(3) | S6   | C48              | 1.770(4) |
| Co2  | N8              | 1.948(3) | O1   | Ba1 <sup>1</sup> | 2.677(3) |
| S1   | O1              | 1.437(3) | O6   | Ba1 <sup>1</sup> | 2.755(3) |
| S1   | O2              | 1.465(3) | N1   | C1               | 1.486(5) |
| S1   | N1              | 1.562(3) | N2   | C2               | 1.467(5) |
| S1   | C21             | 1.764(3) | N2   | C3               | 1.493(5) |
| S2   | O3              | 1.443(3) | N2   | C12              | 1.485(5) |
| S2   | O4              | 1.451(3) | N3   | C4               | 1.471(4) |
| S2   | N3              | 1.579(3) | N4   | C13              | 1.482(4) |
| S2   | C5              | 1.786(4) | N5   | C35              | 1.468(4) |
| S3   | O5              | 1.438(3) | N6   | C36              | 1.482(4) |
| S3   | O6              | 1.458(3) | N6   | C37              | 1.490(5) |
| S3   | N4              | 1.575(3) | N6   | C46              | 1.482(5) |



| Atom | Atom | Length/Å | Atom                   | Atom | Length/Å |
|------|------|----------|------------------------|------|----------|
| N7   | C38  | 1.468(4) | C31                    | C34  | 1.515(7) |
| N8   | C47  | 1.479(5) | C32                    | C33  | 1.392(7) |
| C1   | C2   | 1.524(5) | C35                    | C36  | 1.525(5) |
| C3   | C4   | 1.506(5) | C37                    | C38  | 1.534(5) |
| C5   | C6   | 1.393(5) | C46                    | C47  | 1.542(6) |
| C5   | C10  | 1.386(5) | C48                    | C49  | 1.388(5) |
| C6   | C7   | 1.379(5) | C48                    | C53  | 1.391(5) |
| C7   | C8   | 1.403(5) | C49                    | C50  | 1.387(6) |
| C8   | C9   | 1.393(6) | C50                    | C51  | 1.384(7) |
| C8   | C11  | 1.516(6) | C51                    | C52  | 1.384(8) |
| C9   | C10  | 1.390(6) | C51                    | C54  | 1.527(7) |
| C12  | C13  | 1.510(5) | C52                    | C53  | 1.405(7) |
| C14  | C15  | 1.383(5) | C39A                   | C40A | 1.393(6) |
| C14  | C19  | 1.390(5) | C39A                   | C44A | 1.400(6) |
| C15  | C16  | 1.403(5) | C40A                   | C41A | 1.391(7) |
| C16  | C17  | 1.389(6) | C41A                   | C42A | 1.390(9) |
| C17  | C18  | 1.389(7) | C42A                   | C43A | 1.388(8) |
| C17  | C20  | 1.507(6) | C42A                   | C45A | 1.532(9) |
| C18  | C19  | 1.372(6) | C43A                   | C44A | 1.373(7) |
| C21  | C22  | 1.394(5) | C39B                   | C40B | 1.393(5) |
| C21  | C26  | 1.386(5) | C39B                   | C44B | 1.400(6) |
| C22  | C23  | 1.382(5) | C40B                   | C41B | 1.390(7) |
| C23  | C24  | 1.396(6) | C41B                   | C42B | 1.390(9) |
| C24  | C25  | 1.392(6) | C42B                   | C43B | 1.389(8) |
| C24  | C27  | 1.505(5) | C42B                   | C45B | 1.532(9) |
| C25  | C26  | 1.388(5) | C43B                   | C44B | 1.373(7) |
| C28  | C29  | 1.378(5) | N9                     | C55  | 1.159(7) |
| C28  | C33  | 1.386(6) | C55                    | C57  | 1.442(7) |
| C29  | C30  | 1.410(6) | -----•                 |      |          |
| C30  | C31  | 1.383(8) | <sup>1</sup> -X,-Y,1-Z |      |          |
| C31  | C32  | 1.375(8) |                        |      |          |

**Table S20:** Bond Angles in ° for **CMW-03-052**.

| Atom            | Atom | Atom            | Angle/°    | Atom | Atom | Atom | Angle/°    |
|-----------------|------|-----------------|------------|------|------|------|------------|
| O1 <sup>1</sup> | Ba1  | O2              | 119.79(10) | N3   | Co1  | N1   | 120.23(12) |
| O1 <sup>1</sup> | Ba1  | O6 <sup>1</sup> | 91.45(9)   | N3   | Co1  | N2   | 83.56(11)  |
| O1 <sup>1</sup> | Ba1  | O7              | 82.36(9)   | N3   | Co1  | N4   | 119.42(12) |
| O1 <sup>1</sup> | Ba1  | O10             | 164.48(9)  | N4   | Co1  | N1   | 117.25(12) |
| O1 <sup>1</sup> | Ba1  | O11             | 88.07(9)   | N4   | Co1  | N2   | 84.93(11)  |
| O2              | Ba1  | O6 <sup>1</sup> | 77.40(9)   | N5   | Co2  | N6   | 84.37(11)  |
| O2              | Ba1  | O7              | 145.27(8)  | N5   | Co2  | N8   | 120.72(14) |
| O5              | Ba1  | O1 <sup>1</sup> | 70.39(9)   | N7   | Co2  | N5   | 117.77(14) |
| O5              | Ba1  | O2              | 64.18(9)   | N7   | Co2  | N6   | 84.55(12)  |
| O5              | Ba1  | O6 <sup>1</sup> | 117.55(11) | N7   | Co2  | N8   | 119.28(14) |
| O5              | Ba1  | O7              | 149.45(8)  | N8   | Co2  | N6   | 86.13(12)  |
| O5              | Ba1  | O10             | 125.05(9)  | O1   | S1   | O2   | 117.56(19) |
| O5              | Ba1  | O11             | 85.71(10)  | O1   | S1   | N1   | 112.79(16) |
| O7              | Ba1  | O6 <sup>1</sup> | 75.53(9)   | O1   | S1   | C21  | 105.16(17) |
| O10             | Ba1  | O2              | 72.96(9)   | O2   | S1   | N1   | 103.41(16) |
| O10             | Ba1  | O6 <sup>1</sup> | 82.56(9)   | O2   | S1   | C21  | 105.11(16) |
| O10             | Ba1  | O7              | 82.28(8)   | N1   | S1   | C21  | 112.79(15) |
| O11             | Ba1  | O2              | 123.96(9)  | O3   | S2   | O4   | 117.41(18) |
| O11             | Ba1  | O6 <sup>1</sup> | 155.04(10) | O3   | S2   | N3   | 112.90(17) |
| O11             | Ba1  | O7              | 79.69(8)   | O3   | S2   | C5   | 105.97(17) |
| O11             | Ba1  | O10             | 91.38(8)   | O4   | S2   | N3   | 105.63(16) |
| N1              | Co1  | N2              | 83.91(11)  | O4   | S2   | C5   | 108.00(17) |

| Atom | Atom | Atom             | Angle/°    | Atom | Atom | Atom | Angle/°    |
|------|------|------------------|------------|------|------|------|------------|
| N3   | S2   | C5               | 106.36(16) | C46  | N6   | C37  | 112.6(3)   |
| O5   | S3   | O6               | 115.9(2)   | S5   | N7   | Co2  | 123.66(17) |
| O5   | S3   | N4               | 107.39(16) | C38  | N7   | Co2  | 115.6(2)   |
| O5   | S3   | C14              | 106.31(18) | C38  | N7   | S5   | 120.3(2)   |
| O6   | S3   | N4               | 111.80(17) | S6   | N8   | Co2  | 118.37(17) |
| O6   | S3   | C14              | 105.71(17) | C47  | N8   | Co2  | 112.1(2)   |
| N4   | S3   | C14              | 109.52(15) | C47  | N8   | S6   | 118.7(2)   |
| O7   | S4   | N5               | 105.95(15) | N1   | C1   | C2   | 108.6(3)   |
| O7   | S4   | C28              | 106.12(17) | N2   | C2   | C1   | 111.5(3)   |
| O8   | S4   | O7               | 115.85(16) | N2   | C3   | C4   | 111.3(3)   |
| O8   | S4   | N5               | 114.80(16) | N3   | C4   | C3   | 108.5(3)   |
| O8   | S4   | C28              | 106.37(18) | C6   | C5   | S2   | 118.4(3)   |
| N5   | S4   | C28              | 107.13(17) | C10  | C5   | S2   | 121.4(3)   |
| O9   | S5   | O10              | 116.50(17) | C10  | C5   | C6   | 120.2(4)   |
| O9   | S5   | N7               | 113.85(17) | C7   | C6   | C5   | 120.2(3)   |
| O9   | S5   | C39A             | 108.9(4)   | C6   | C7   | C8   | 120.5(4)   |
| O9   | S5   | C39B             | 104.1(3)   | C7   | C8   | C11  | 119.6(4)   |
| O10  | S5   | N7               | 105.64(15) | C9   | C8   | C7   | 118.6(4)   |
| O10  | S5   | C39A             | 107.4(4)   | C9   | C8   | C11  | 121.8(4)   |
| O10  | S5   | C39B             | 105.0(3)   | C10  | C9   | C8   | 121.2(3)   |
| N7   | S5   | C39A             | 103.6(4)   | C5   | C10  | C9   | 119.4(4)   |
| N7   | S5   | C39B             | 111.5(3)   | N2   | C12  | C13  | 111.8(3)   |
| O11  | S6   | N8               | 105.56(16) | N4   | C13  | C12  | 110.5(3)   |
| O11  | S6   | C48              | 106.59(16) | C15  | C14  | S3   | 120.4(3)   |
| O12  | S6   | O11              | 115.94(17) | C15  | C14  | C19  | 120.7(3)   |
| O12  | S6   | N8               | 114.62(18) | C19  | C14  | S3   | 118.8(3)   |
| O12  | S6   | C48              | 105.72(18) | C14  | C15  | C16  | 118.7(4)   |
| N8   | S6   | C48              | 107.94(17) | C17  | C16  | C15  | 121.0(4)   |
| S1   | O1   | Ba1 <sup>1</sup> | 149.8(2)   | C16  | C17  | C18  | 118.6(4)   |
| S1   | O2   | Ba1              | 144.54(19) | C16  | C17  | C20  | 120.6(5)   |
| S3   | O5   | Ba1              | 168.8(3)   | C18  | C17  | C20  | 120.8(5)   |
| S3   | O6   | Ba1 <sup>1</sup> | 123.17(18) | C19  | C18  | C17  | 121.3(4)   |
| S4   | O7   | Ba1              | 161.06(15) | C18  | C19  | C14  | 119.7(4)   |
| S5   | O10  | Ba1              | 163.40(15) | C22  | C21  | S1   | 117.8(3)   |
| S6   | O11  | Ba1              | 160.14(17) | C26  | C21  | S1   | 121.4(3)   |
| S1   | N1   | Co1              | 108.25(15) | C26  | C21  | C22  | 120.6(3)   |
| C1   | N1   | Co1              | 112.1(2)   | C23  | C22  | C21  | 119.4(3)   |
| C1   | N1   | S1               | 117.4(2)   | C22  | C23  | C24  | 121.1(4)   |
| C2   | N2   | Co1              | 106.5(2)   | C23  | C24  | C27  | 120.2(4)   |
| C2   | N2   | C3               | 112.5(3)   | C25  | C24  | C23  | 118.3(3)   |
| C2   | N2   | C12              | 113.0(3)   | C25  | C24  | C27  | 121.5(4)   |
| C3   | N2   | Co1              | 106.4(2)   | C26  | C25  | C24  | 121.4(4)   |
| C12  | N2   | Co1              | 106.5(2)   | C21  | C26  | C25  | 119.1(4)   |
| C12  | N2   | C3               | 111.4(3)   | C29  | C28  | S4   | 120.7(3)   |
| S2   | N3   | Co1              | 124.99(16) | C29  | C28  | C33  | 120.7(4)   |
| C4   | N3   | Co1              | 115.4(2)   | C33  | C28  | S4   | 118.6(3)   |
| C4   | N3   | S2               | 117.0(2)   | C28  | C29  | C30  | 118.8(4)   |
| S3   | N4   | Co1              | 128.94(16) | C31  | C30  | C29  | 121.0(4)   |
| C13  | N4   | Co1              | 112.9(2)   | C30  | C31  | C34  | 120.8(5)   |
| C13  | N4   | S3               | 117.8(2)   | C32  | C31  | C30  | 118.8(5)   |
| S4   | N5   | Co2              | 124.99(16) | C32  | C31  | C34  | 120.3(6)   |
| C35  | N5   | Co2              | 114.8(2)   | C31  | C32  | C33  | 121.3(5)   |
| C35  | N5   | S4               | 119.7(2)   | C28  | C33  | C32  | 119.3(4)   |
| C36  | N6   | Co2              | 106.6(2)   | N5   | C35  | C36  | 107.4(3)   |
| C36  | N6   | C37              | 111.8(3)   | N6   | C36  | C35  | 110.5(3)   |
| C36  | N6   | C46              | 113.0(3)   | N6   | C37  | C38  | 110.7(3)   |
| C37  | N6   | Co2              | 107.1(2)   | N7   | C38  | C37  | 107.8(3)   |
| C46  | N6   | Co2              | 105.1(2)   | N6   | C46  | C47  | 110.5(3)   |

| Atom | Atom | Atom | Angle/°  | Atom                   | Atom | Atom | Angle/°  |
|------|------|------|----------|------------------------|------|------|----------|
| N8   | C47  | C46  | 107.1(3) | C43A                   | C42A | C41A | 118.3(5) |
| C49  | C48  | S6   | 119.7(3) | C43A                   | C42A | C45A | 120.5(6) |
| C49  | C48  | C53  | 120.3(4) | C44A                   | C43A | C42A | 121.6(5) |
| C53  | C48  | S6   | 120.0(3) | C43A                   | C44A | C39A | 119.6(4) |
| C50  | C49  | C48  | 120.4(4) | C40B                   | C39B | S5   | 118.0(4) |
| C51  | C50  | C49  | 120.2(4) | C40B                   | C39B | C44B | 120.1(4) |
| C50  | C51  | C52  | 119.4(4) | C44B                   | C39B | S5   | 121.9(4) |
| C50  | C51  | C54  | 118.8(5) | C41B                   | C40B | C39B | 118.9(5) |
| C52  | C51  | C54  | 121.8(5) | C42B                   | C41B | C40B | 121.6(5) |
| C51  | C52  | C53  | 121.2(5) | C41B                   | C42B | C45B | 121.2(6) |
| C48  | C53  | C52  | 118.4(5) | C43B                   | C42B | C41B | 118.3(5) |
| C40A | C39A | S5   | 123.2(6) | C43B                   | C42B | C45B | 120.5(6) |
| C40A | C39A | C44A | 120.1(4) | C44B                   | C43B | C42B | 121.5(5) |
| C44A | C39A | S5   | 116.7(6) | C43B                   | C44B | C39B | 119.6(4) |
| C41A | C40A | C39A | 118.9(5) | N9                     | C55  | C57  | 177.0(6) |
| C42A | C41A | C40A | 121.6(5) | -----•                 |      |      |          |
| C41A | C42A | C45A | 121.2(6) | <sup>1</sup> -X,-Y,1-Z |      |      |          |

**Table S21:** Hydrogen Fractional Atomic Coordinates ( $\times 10^4$ ) and Equivalent Isotropic Displacement Parameters ( $\text{\AA}^2 \times 10^3$ ) for **CMW-03-052**.  $U_{eq}$  is defined as 1/3 of the trace of the orthogonalised  $U_{ij}$ .

| Atom | x     | y     | z     | $U_{eq}$ |
|------|-------|-------|-------|----------|
| H1A  | 2881  | 2637  | 4361  | 37       |
| H1B  | 2717  | 1521  | 4203  | 37       |
| H2A  | 4252  | 2240  | 4764  | 38       |
| H2B  | 4078  | 3219  | 5541  | 38       |
| H3A  | 5167  | 2847  | 6411  | 38       |
| H3B  | 4739  | 2204  | 6882  | 38       |
| H4A  | 4821  | 3801  | 7933  | 33       |
| H4B  | 4488  | 4084  | 7180  | 33       |
| H6   | 3270  | 1589  | 7879  | 33       |
| H7   | 3995  | 711   | 8403  | 37       |
| H9   | 5281  | 3306  | 10652 | 39       |
| H10  | 4564  | 4190  | 10118 | 37       |
| H11A | 4793  | 941   | 10113 | 76       |
| H11B | 5705  | 1792  | 10404 | 76       |
| H11C | 5453  | 885   | 9406  | 76       |
| H12A | 4426  | 886   | 5346  | 35       |
| H12B | 3495  | 661   | 4732  | 35       |
| H13A | 3139  | -303  | 5432  | 31       |
| H13B | 3732  | 538   | 6379  | 31       |
| H15  | 2457  | -1458 | 6260  | 32       |
| H16  | 2848  | -1767 | 7482  | 40       |
| H18  | 1650  | 311   | 9093  | 44       |
| H19  | 1298  | 658   | 7912  | 36       |
| H20A | 2723  | -1565 | 8992  | 90       |
| H20B | 2103  | -908  | 9567  | 90       |
| H20C | 3124  | -398  | 9606  | 90       |
| H22  | 392   | 3422  | 5652  | 33       |
| H23  | -489  | 4111  | 5034  | 38       |
| H25  | -159  | 2256  | 2501  | 39       |
| H26  | 710   | 1542  | 3108  | 35       |
| H27A | -1573 | 3703  | 3570  | 66       |
| H27B | -1186 | 3276  | 2651  | 66       |
| H27C | -705  | 4361  | 3446  | 66       |
| H29  | -4970 | -19   | 6299  | 42       |
| H30  | -5707 | -1378 | 6523  | 57       |

| Atom | x     | y     | z     | $U_{eq}$ |
|------|-------|-------|-------|----------|
| H32  | -3470 | -968  | 8180  | 64       |
| H33  | -2722 | 377   | 7967  | 49       |
| H34A | -5775 | -2274 | 7446  | 115      |
| H34B | -4891 | -2110 | 8094  | 115      |
| H34C | -5018 | -2811 | 7032  | 115      |
| H35A | -4065 | 2263  | 8281  | 36       |
| H35B | -3639 | 3205  | 8140  | 36       |
| H36A | -3421 | 3836  | 9708  | 35       |
| H36B | -3107 | 2901  | 9654  | 35       |
| H37A | -2032 | 5397  | 10015 | 34       |
| H37B | -2564 | 4750  | 8999  | 34       |
| H38A | -1209 | 5562  | 8818  | 34       |
| H38B | -639  | 5417  | 9558  | 34       |
| H46A | -1878 | 4307  | 10865 | 35       |
| H46B | -990  | 4614  | 10507 | 35       |
| H47A | -829  | 3263  | 10739 | 35       |
| H47B | -1829 | 2626  | 10218 | 35       |
| H49  | 1179  | 2621  | 9188  | 33       |
| H50  | 2519  | 2980  | 10156 | 47       |
| H52  | 1135  | 1614  | 11450 | 85       |
| H53  | -220  | 1209  | 10457 | 62       |
| H54A | 3301  | 2401  | 11224 | 144      |
| H54B | 2740  | 2361  | 11981 | 144      |
| H54C | 3050  | 3372  | 11924 | 144      |
| H40A | -2346 | 2832  | 6243  | 42       |
| H41A | -3430 | 3099  | 5391  | 58       |
| H43A | -2013 | 5981  | 6391  | 56       |
| H44A | -925  | 5744  | 7245  | 37       |
| H45A | -3951 | 4103  | 4788  | 128      |
| H45B | -3257 | 5093  | 4928  | 128      |
| H45C | -3912 | 5138  | 5637  | 128      |
| H40B | -2187 | 2819  | 6169  | 41       |
| H41B | -3245 | 2967  | 5196  | 59       |
| H43B | -1919 | 5865  | 6118  | 54       |
| H44B | -859  | 5746  | 7090  | 36       |
| H45D | -3322 | 4057  | 4253  | 126      |
| H45E | -3218 | 5189  | 4957  | 126      |
| H45F | -3978 | 4333  | 4975  | 126      |
| H57A | 2197  | 4522  | 6515  | 69       |
| H57B | 1581  | 4706  | 7273  | 69       |
| H57C | 2449  | 4325  | 7344  | 69       |

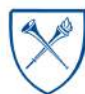

Submitted by: **Christian Wallen**  
Emory University

Solved by: **John Bacsá**

Sample ID: **CMW-02-139aq**

## Crystal Data and Experimental

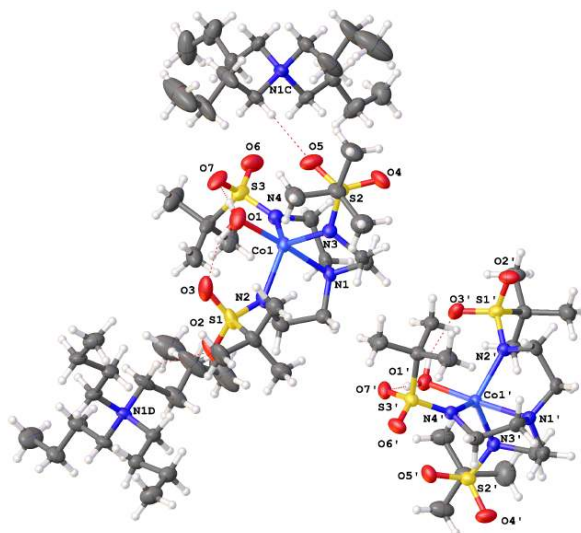

**Experimental.** Single violet needle-shaped crystals of (CMW-02-139aq) were recrystallised from --•by vapor diffusion. A suitable crystal (1.43×0.33×0.32 mm) was selected and mounted on a loop on a Bruker APEX-II CCD diffractometer. The crystal was cooled to  $T = 100(2)$  K during data collection. The structure was solved with the **ShelXT** (Sheldrick, 2015) structure solution program using combined Patterson and dual-space recycling methods and by using **Olex2** (Dolomanov et al., 2009) as the graphical interface. The crystal structure was refined with version 2013-4 of **ShelXL** (Sheldrick, 2008) using Least Squares minimisation.

**Crystal Data.**  $C_{68}H_{154}Co_2N_{10}O_{14}S_6$ ,  $M_r = 1646.22$ , monoclinic,  $P2_1/c$  (No. 14),  $a = 16.5036(15)$  Å,  $b = 25.928(2)$  Å,  $c = 22.811(2)$  Å,  $\beta = 106.650(2)^\circ$ ,  $\alpha = \gamma = 90^\circ$ ,  $V = 9351.7(14)$  Å<sup>3</sup>,  $T = 100(2)$  K,  $Z = 4$ ,  $Z' = 1$ ,  $\mu(\text{MoK}\alpha) = 0.545$ , 52521 reflections measured, 21341 unique ( $R_{int} = 0.0607$ ) which were used in all calculations. The final  $wR_2$  was 0.1613 (all data) and  $R_1$  was 0.0600 ( $I > 2\sigma(I)$ ).

| Compound                     | CMW-02-139aq                       |
|------------------------------|------------------------------------|
| Formula                      | $C_{68}H_{154}Co_2N_{10}O_{14}S_6$ |
| $D_{calc.}/g\text{ cm}^{-3}$ | 1.169                              |
| $\mu/\text{mm}^{-1}$         | 0.545                              |
| Formula Weight               | 1645.22                            |
| Colour                       | violet                             |
| Shape                        | needle                             |
| Max Size/mm                  | 1.43                               |
| Mid Size/mm                  | 0.33                               |
| Min Size/mm                  | 0.32                               |
| $T/\text{K}$                 | 100(2)                             |
| Crystal System               | monoclinic                         |
| Space Group                  | $P2_1/c$                           |
| $a/\text{Å}$                 | 16.5036(15)                        |
| $b/\text{Å}$                 | 25.928(2)                          |
| $c/\text{Å}$                 | 22.811(2)                          |
| $\alpha/^\circ$              | 90                                 |
| $\beta/^\circ$               | 106.650(2)                         |
| $\gamma/^\circ$              | 90                                 |
| $V/\text{Å}^3$               | 9351.7(14)                         |
| $Z$                          | 4                                  |
| $Z'$                         | 1                                  |
| $\Theta_{min}/^\circ$        | 1.826                              |
| $\Theta_{max}/^\circ$        | 27.484                             |
| Measured Refl.               | 52521                              |
| Independent Refl.            | 21341                              |
| $I > 2\sigma(I)$             | 12581                              |
| $R_{int}$                    | 0.0607                             |
| Parameters                   | 952                                |
| Restraints                   | 140                                |
| Largest Peak                 | 1.171                              |
| Deepest Hole                 | -0.669                             |
| GooF                         | 1.027                              |
| $wR_2$ (all data)            | 0.1613                             |
| $wR_2$                       | 0.1361                             |
| $R_1$ (all data)             | 0.1153                             |
| $R_1$                        | 0.0600                             |
| CCDC #                       | 1344433                            |

## Structure Quality Indicators

|                     |       |       |            |     |                  |       |          |       |
|---------------------|-------|-------|------------|-----|------------------|-------|----------|-------|
| <b>Reflections:</b> | d min | 0.77  | $1/\sigma$ | 7.8 | R <sub>int</sub> | 6.07% | complete | 100%  |
| <b>Refinement:</b>  | Shift | 0.002 | Max Peak   | 1.2 | Min Peak         | -0.7  | Goof     | 1.027 |

A violet needle-shaped crystal with dimensions 1.43×0.33×0.32 mm was mounted on a loop with paratone oil. X-ray diffraction data were collected using a Bruker APEX-II CCD diffractometer equipped with an Oxford Cryosystems low-temperature apparatus operating at  $T = 100(2)$  K.

Data were measured using  $\phi$  and  $\omega$  scans using MoK $\alpha$  radiation (fine-focus sealed tube, 45 kV, 35 mA). The total number of runs and images was based on the strategy calculation from the program **APEX2** (Bruker, 2013). The maximum resolution achieved was  $\Theta = 27.484$ .

Unit cell indexing was performed by using the **APEX2** (Bruker, 2013) software and refined using **SAINT** (Bruker, V8.34A, 2013) on 6548 reflections, 12% of the observed reflections. Data reduction, scaling and absorption corrections were performed using **SAINT** (Bruker, V8.34A, 2013) and **SADABS-2012/1** (Bruker, 2012) was used for absorption correction.  $wR_2(\text{int})$  was 0.0753 before and 0.0483 after correction. The Ratio of minimum to maximum transmission is 0.8728. The  $\lambda/2$  correction factor is 0.0015. The software corrects for Lorentz polarisation. The final completeness is 99.7% out to  $27.484^\circ$  in  $\Theta$ . The absorption coefficient ( $\mu$ ) of this material is 0.545 mm<sup>-1</sup> and the minimum and maximum transmissions are 0.6509 and 0.7458.

The structure was solved in the space group P1 with the **ShelXT** (Sheldrick, 2015) structure solution program using combined Patterson and dual-space recycling methods. The space group P2<sub>1</sub>/c (# 14) was determined by the **ShelXT** (Sheldrick, 2015) structure solution program. The crystal structure was refined by Least Squares using version 2013-4 of **ShelXL** (Sheldrick, 2008). All non-hydrogen atoms were refined anisotropically. Hydrogen atom positions were calculated geometrically and refined using the riding model.

There are two independent molecules in the asymmetric unit.

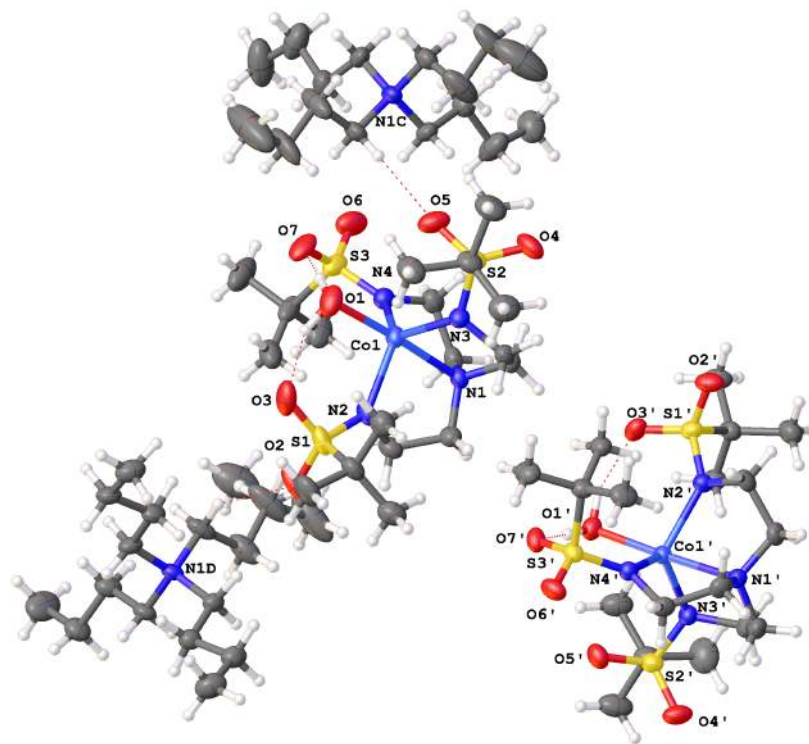

Figure S18:

### Data Plots: Diffraction Data

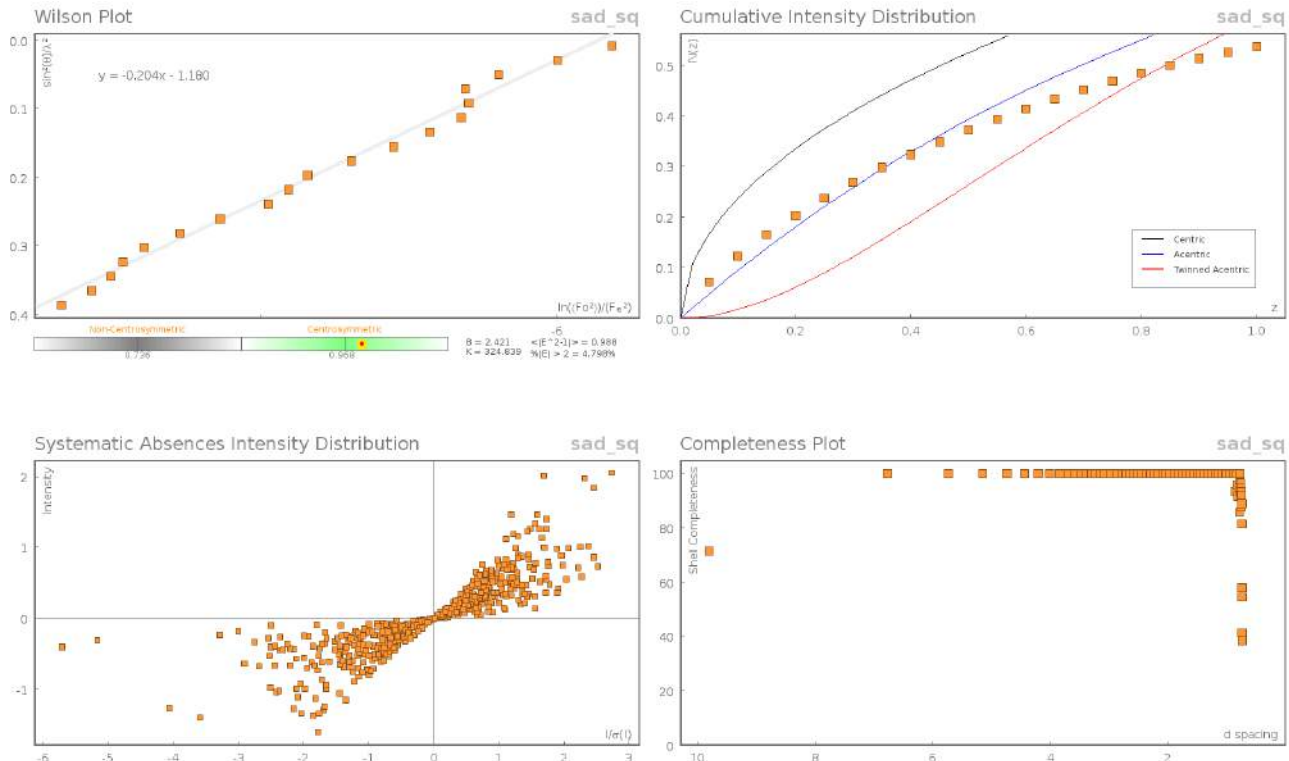

## Data Plots: Refinement and Data

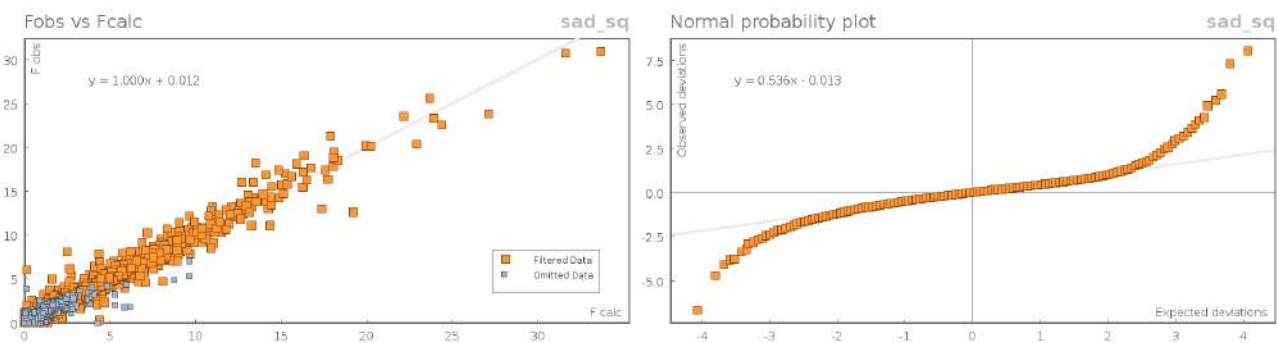

## Reflection Statistics

|                                         |               |                                         |                 |
|-----------------------------------------|---------------|-----------------------------------------|-----------------|
| Total reflections (after filtering)     | 53423         | Unique reflections                      | 21341           |
| Completeness                            | 0.995         | Mean $I/\sigma$                         | 7.76            |
| hkl <sub>sub</sub> >max</sub> collected | (22, 34, 30)  | hkl <sub>sub</sub> >min</sub> collected | (-22, -28, -15) |
| hkl <sub>max</sub> used                 | (20, 33, 29)  | hkl <sub>min</sub> used                 | (-21, 0, 0)     |
| Lim d <sub>max</sub> collected          | 20.0          | Lim d <sub>min</sub> collected          | 0.77            |
| d <sub>max</sub> used                   | 11.15         | d <sub>min</sub> used                   | 0.77            |
| Friedel pairs                           | 6036          | Friedel pairs merged                    | 1               |
| Inconsistent equivalents                | 0             | R <sub>int</sub>                        | 0.0607          |
| R <sub>sigma</sub>                      | 0.09          | Intensity transformed                   | 0               |
| Omitted reflections                     | 0             | Omitted by user (OMIT hkl)              | 158             |
| Multiplicity                            | (41686, 8320) | Maximum multiplicity                    | 6               |
| Removed systematic absences             | 744           | Filtered off (Shel/OMIT)                | 4903            |

## Images of the Crystal on the Diffractometer

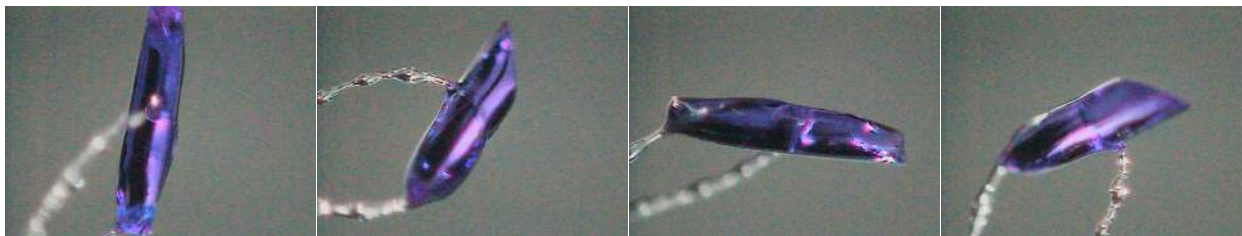

**Table S17:** Fractional Atomic Coordinates ( $\times 10^4$ ) and Equivalent Isotropic Displacement Parameters ( $\text{\AA}^2 \times 10^3$ ) for **sad\_sq**.  $U_{eq}$  is defined as  $1/3$  of the trace of the orthogonalised  $U_{ij}$ .

| Atom | x       | y          | z          | $U_{eq}$ |
|------|---------|------------|------------|----------|
| C1   | 5661(2) | 5141.0(13) | 3051.1(17) | 34.4(8)  |
| C2   | 4900(2) | 5472.9(14) | 3030.7(17) | 39.1(9)  |
| C3   | 5952(2) | 4246.2(13) | 2849.7(15) | 31.2(8)  |
| C4   | 5517(2) | 4196.8(14) | 2167.5(16) | 33.2(8)  |
| C5   | 5532(2) | 4466.5(14) | 3766.2(15) | 33.9(8)  |
| C6   | 4905(2) | 4042.8(14) | 3796.9(17) | 37.5(9)  |
| C7   | 3826(2) | 5774.2(14) | 1454.8(17) | 39.6(9)  |
| C8   | 3164(3) | 6138.9(17) | 1046(2)    | 59.2(12) |
| C9   | 4707(3) | 6015.8(15) | 1614.3(19) | 49.1(10) |
| C10  | 3818(2) | 5257.1(14) | 1137.5(17) | 42.4(9)  |
| C11  | 3960(2) | 3502.1(14) | 1007.6(16) | 37.8(9)  |
| C12  | 4606(3) | 3763.0(16) | 745.1(18)  | 52.4(11) |



| Atom | x           | y          | z          | $U_{eq}$  |
|------|-------------|------------|------------|-----------|
| C13  | 3813(3)     | 2941.5(15) | 779(2)     | 56.8(12)  |
| C14  | 3129(3)     | 3797.8(16) | 835.0(18)  | 49.7(10)  |
| C15  | 3118(2)     | 4681.6(16) | 4110.9(19) | 47.8(11)  |
| C16  | 2356(3)     | 4566(2)    | 4347(3)    | 77.5(17)  |
| C17  | 2952(3)     | 5139.2(16) | 3677(2)    | 58.4(12)  |
| C18  | 3907(3)     | 4765.5(18) | 4651.8(19) | 58.4(12)  |
| N1   | 5454.9(16)  | 4597.7(10) | 3126.2(12) | 28.1(6)   |
| N2   | 4155.2(18)  | 5261.8(11) | 2567.0(13) | 35.3(7)   |
| N3   | 4627.6(17)  | 4050.1(11) | 2079.4(12) | 30.5(6)   |
| N4   | 4057.7(18)  | 4203.4(11) | 3430.0(13) | 34.2(7)   |
| O1   | 2779.9(16)  | 4405.6(12) | 2126.3(13) | 50.7(7)   |
| O2   | 3572(2)     | 6166.3(11) | 2438.0(13) | 65.9(9)   |
| O3   | 2689.4(17)  | 5429.4(12) | 1947.5(13) | 56.7(8)   |
| O4   | 5106.5(17)  | 3143.4(10) | 1962.5(12) | 50.9(7)   |
| O5   | 3674.9(17)  | 3312.3(10) | 2059.3(12) | 51.3(7)   |
| O6   | 3447.9(19)  | 3689.4(11) | 4126.8(13) | 58.4(8)   |
| O7   | 2519.8(16)  | 4069.7(11) | 3186.3(13) | 54.0(8)   |
| S1   | 3526.9(6)   | 5664.1(4)  | 2150.4(4)  | 43.3(3)   |
| S2   | 4371.8(6)   | 3482.0(3)  | 1838.8(4)  | 35.1(2)   |
| S3   | 3289.4(6)   | 4108.4(4)  | 3693.3(5)  | 42.7(2)   |
| Co1  | 4090.9(3)   | 4478.1(2)  | 2604.0(2)  | 30.88(13) |
| C1'  | 281(2)      | 4694.3(13) | 2010.8(18) | 36.3(8)   |
| C2'  | -440(2)     | 4345.8(13) | 2039.8(16) | 33.9(8)   |
| C3'  | 695(2)      | 5596.1(14) | 2203.9(17) | 36.9(9)   |
| C4'  | 823(2)      | 5636.2(15) | 2885.1(17) | 37.6(9)   |
| C5'  | -455(2)     | 5361.9(14) | 1293.1(16) | 35.9(8)   |
| C6'  | -1138(2)    | 5759.8(13) | 1261.6(16) | 33.9(8)   |
| C7'  | -289(2)     | 3999.7(13) | 3601.2(15) | 31.7(8)   |
| C8'  | -628(2)     | 3605.6(14) | 3972.4(17) | 42.4(9)   |
| C9'  | 469(2)      | 3773.4(14) | 3428.7(18) | 42.4(9)   |
| C10' | -50(2)      | 4501.5(13) | 3961.0(16) | 35.4(8)   |
| C11' | 160(2)      | 6314.8(14) | 4056.0(16) | 37.5(9)   |
| C12' | 1045(3)     | 6085.0(19) | 4313.1(19) | 62.9(13)  |
| C13' | 123(3)      | 6869.2(15) | 4276.4(19) | 55.0(12)  |
| C14' | -502(3)     | 5981.9(15) | 4226.0(18) | 49.5(11)  |
| C15' | -3096(2)    | 5038.6(13) | 1003.1(14) | 29.5(8)   |
| C16' | -4053(2)    | 5111.1(15) | 748.5(17)  | 41.8(9)   |
| C17' | -2894(2)    | 4607.1(13) | 1476.4(16) | 33.2(8)   |
| C18' | -2705(3)    | 4927.0(14) | 489.6(16)  | 41.4(9)   |
| N1'  | -6.5(17)    | 5235.1(10) | 1938.3(13) | 31.1(7)   |
| N2'  | -814.5(17)  | 4547.2(10) | 2514.7(12) | 28.3(6)   |
| N3'  | 3.0(16)     | 5768.7(10) | 2989.9(13) | 30.7(6)   |
| N4'  | -1671.2(16) | 5591.2(10) | 1645.1(12) | 27.4(6)   |
| O1'  | -1872.0(15) | 5388.1(10) | 2951.1(11) | 33.5(6)   |
| O2'  | -1318.8(16) | 3641.4(9)  | 2585.9(11) | 40.8(6)   |
| O3'  | -1810.2(14) | 4354.1(9)  | 3111.0(11) | 38.5(6)   |
| O4'  | 520.2(17)   | 6684.2(10) | 3096.1(12) | 46.0(7)   |
| O5'  | -973.6(15)  | 6482.9(9)  | 3006.5(11) | 39.9(6)   |
| O6'  | -2908.6(15) | 6033.9(9)  | 907.4(11)  | 39.7(6)   |
| O7'  | -3030.5(14) | 5688.0(9)  | 1884.4(10) | 34.4(6)   |
| S1'  | -1132.0(5)  | 4133.1(3)  | 2902.2(4)  | 30.5(2)   |
| S2'  | -91.8(5)    | 6331.0(3)  | 3225.0(4)  | 32.2(2)   |
| S3'  | -2662.0(5)  | 5640.5(3)  | 1377.0(4)  | 29.11(19) |
| Co1' | -947.9(3)   | 5330.9(2)  | 2469.4(2)  | 25.66(11) |
| C1D  | 2639(2)     | 7880.9(12) | 3283.2(15) | 31.4(8)   |
| C2D  | 2200(3)     | 7814.5(14) | 3771.4(17) | 42.0(9)   |
| C3D  | 2188(3)     | 8314.4(14) | 4116.3(17) | 43.3(9)   |
| C4D  | 1797(3)     | 8257.0(19) | 4640(2)    | 69.8(14)  |

| Atom | x          | y          | z          | $U_{eq}$ |
|------|------------|------------|------------|----------|
| C5D  | 3173(2)    | 7513.4(13) | 2461.9(16) | 32.5(8)  |
| C6D  | 2866(2)    | 7920.6(13) | 1968.0(16) | 34.1(8)  |
| C7D  | 3375(2)    | 7891.3(15) | 1505.3(16) | 39.7(9)  |
| C8D  | 2993(3)    | 8224.6(16) | 941.9(18)  | 51.3(11) |
| C9D  | 1688(2)    | 7341.9(13) | 2475.2(16) | 34.6(8)  |
| C10D | 1572(2)    | 6961.0(14) | 1948.5(17) | 37.5(9)  |
| C11D | 669(2)     | 6970.5(14) | 1530.0(16) | 37.3(9)  |
| C12D | 564(3)     | 6662.3(16) | 951.3(18)  | 49(1)    |
| C13D | 2896(3)    | 6933.5(13) | 3240.8(17) | 42.3(9)  |
| C14D | 3794(3)    | 6946.3(16) | 3659.7(18) | 57.2(12) |
| C15D | 3997(4)    | 6460.4(18) | 4033(2)    | 82.8(17) |
| C16D | 3642(8)    | 6402(4)    | 4569(4)    | 98(4)    |
| C16E | 4881(5)    | 6424(4)    | 4469(4)    | 104(4)   |
| N1D  | 2600.0(18) | 7416.3(10) | 2866.2(12) | 29.5(6)  |
| C1C  | 2825(2)    | 1923.3(14) | 2668.9(18) | 44.3(9)  |
| C2C  | 3243(4)    | 2026.1(18) | 2172(2)    | 80.0(17) |
| C3C  | 3229(4)    | 1509.7(18) | 1811(3)    | 87.7(18) |
| C4C  | 3530(6)    | 1540(2)    | 1293(3)    | 138(3)   |
| C5C  | 3617(2)    | 2575.9(14) | 3431.1(18) | 37.9(9)  |
| C6C  | 4162(2)    | 2207.8(15) | 3894.3(18) | 43.0(9)  |
| C7C  | 4977(3)    | 2457.3(19) | 4236(2)    | 63.2(13) |
| C8C  | 5577(3)    | 2145.6(17) | 4718.7(19) | 57.4(12) |
| C9C  | 2257(2)    | 2187.4(15) | 3486(2)    | 45.2(10) |
| C10C | 2134(3)    | 2569.1(16) | 3957(2)    | 56.7(11) |
| C11C | 1663(3)    | 2315(2)    | 4365(2)    | 71.9(14) |
| C12C | 1523(4)    | 2651(2)    | 4855(3)    | 99(2)    |
| C13C | 2315(2)    | 2839.6(14) | 2692.5(19) | 42.6(9)  |
| C14C | 1430(3)    | 2740.9(17) | 2273(2)    | 76.6(16) |
| C15C | 1109(3)    | 3228.1(18) | 1894(2)    | 78.9(16) |
| C16C | 313(5)     | 3197(3)    | 1432(3)    | 156(4)   |
| N1C  | 2752.2(18) | 2381.7(11) | 3074.1(14) | 36.7(7)  |

**Table S18:** Anisotropic Displacement Parameters ( $\times 10^4$ ) **sad\_sq**. The anisotropic displacement factor exponent takes the form:  $-2\pi^2[h^2a^{*2} \times U_{11} + \dots + 2hka^* \times b^* \times U_{12}]$

| Atom | $U_{11}$ | $U_{22}$ | $U_{33}$ | $U_{23}$ | $U_{13}$ | $U_{12}$  |
|------|----------|----------|----------|----------|----------|-----------|
| C1   | 30.5(18) | 30(2)    | 41(2)    | -3.5(16) | 7.5(16)  | -2.8(16)  |
| C2   | 43(2)    | 28(2)    | 44(2)    | -3.8(16) | 8.0(18)  | 1.9(17)   |
| C3   | 23.3(17) | 32(2)    | 40(2)    | 0.5(16)  | 10.5(15) | 3.8(15)   |
| C4   | 33.5(19) | 28(2)    | 43(2)    | 1.1(16)  | 18.2(17) | 1.1(15)   |
| C5   | 29.0(18) | 37(2)    | 33.2(19) | -3.2(16) | 4.3(15)  | 10.0(16)  |
| C6   | 41(2)    | 36(2)    | 38(2)    | 4.2(16)  | 14.5(17) | 6.3(17)   |
| C7   | 48(2)    | 27(2)    | 44(2)    | 3.5(17)  | 13.3(18) | 10.3(17)  |
| C8   | 72(3)    | 46(3)    | 60(3)    | 18(2)    | 19(2)    | 28(2)     |
| C9   | 60(3)    | 36(2)    | 49(2)    | 1.4(19)  | 13(2)    | 1(2)      |
| C10  | 44(2)    | 42(2)    | 39(2)    | 1.4(17)  | 8.2(18)  | 5.2(18)   |
| C11  | 45(2)    | 30(2)    | 36(2)    | -7.0(16) | 7.2(17)  | -1.6(17)  |
| C12  | 67(3)    | 52(3)    | 39(2)    | -8(2)    | 18(2)    | -8(2)     |
| C13  | 70(3)    | 38(2)    | 58(3)    | -16(2)   | 13(2)    | -3(2)     |
| C14  | 53(3)    | 44(2)    | 43(2)    | -6.5(19) | 0(2)     | 3(2)      |
| C15  | 33(2)    | 55(3)    | 62(3)    | -31(2)   | 24(2)    | -14.4(19) |
| C16  | 54(3)    | 94(4)    | 101(4)   | -52(3)   | 48(3)    | -25(3)    |
| C17  | 40(2)    | 48(3)    | 82(3)    | -23(2)   | 10(2)    | 5(2)      |
| C18  | 48(3)    | 72(3)    | 56(3)    | -31(2)   | 16(2)    | -1(2)     |
| N1   | 26.3(14) | 27.3(16) | 30.7(15) | -1.5(12) | 8.1(12)  | 4.1(12)   |
| N2   | 34.8(17) | 29.9(17) | 38.7(17) | 0.4(13)  | 6.7(14)  | 10.8(13)  |
| N3   | 28.8(15) | 28.2(16) | 34.4(15) | -4.0(13) | 9.0(13)  | -1.5(12)  |
| N4   | 32.8(16) | 30.9(17) | 41.3(17) | -2.8(13) | 14.6(14) | -0.7(13)  |

| Atom | $U_{11}$ | $U_{22}$ | $U_{33}$ | $U_{23}$  | $U_{13}$ | $U_{12}$  |
|------|----------|----------|----------|-----------|----------|-----------|
| O1   | 30.4(14) | 69(2)    | 50.0(17) | -16.8(16) | 6.7(13)  | -0.6(14)  |
| O2   | 98(3)    | 48.3(19) | 51.1(18) | -1.9(14)  | 21.8(17) | 42.1(18)  |
| O3   | 39.2(16) | 76(2)    | 57.1(18) | 20.7(15)  | 18.1(14) | 25.6(15)  |
| O4   | 56.9(18) | 28.6(15) | 60.3(18) | 0.9(13)   | 5.9(15)  | 12.7(13)  |
| O5   | 59.3(18) | 46.4(17) | 51.8(17) | -5.4(13)  | 21.6(15) | -22.2(14) |
| O6   | 76(2)    | 49.6(18) | 65.5(19) | -10.1(15) | 45.3(17) | -15.8(16) |
| O7   | 37.7(15) | 66(2)    | 62.2(18) | -31.1(15) | 19.9(14) | -24.6(14) |
| S1   | 46.0(6)  | 41.9(6)  | 43.3(5)  | 4.2(4)    | 14.6(5)  | 22.3(5)   |
| S2   | 39.6(5)  | 26.3(5)  | 38.6(5)  | -0.1(4)   | 9.7(4)   | -1.9(4)   |
| S3   | 41.2(5)  | 41.3(6)  | 52.4(6)  | -15.5(5)  | 24.3(5)  | -13.5(5)  |
| Co1  | 24.9(2)  | 31.4(3)  | 35.7(3)  | -4.6(2)   | 7.5(2)   | 1.4(2)    |
| C1'  | 32.6(19) | 34(2)    | 48(2)    | -1.6(17)  | 21.6(17) | 5.1(16)   |
| C2'  | 38(2)    | 26.2(19) | 40(2)    | -2.5(16)  | 15.9(17) | 8.0(16)   |
| C3'  | 28.3(18) | 33(2)    | 53(2)    | 1.6(17)   | 18.7(17) | -0.2(16)  |
| C4'  | 24.2(18) | 35(2)    | 52(2)    | -4.7(17)  | 9.3(17)  | -0.8(16)  |
| C5'  | 37(2)    | 37(2)    | 39(2)    | 2.5(17)   | 20.0(17) | -4.3(17)  |
| C6'  | 36(2)    | 30(2)    | 37(2)    | 5.5(15)   | 12.9(16) | -3.0(16)  |
| C7'  | 30.8(18) | 24.6(19) | 36.2(19) | 1.1(15)   | 4.1(15)  | 0.7(15)   |
| C8'  | 53(2)    | 32(2)    | 39(2)    | 9.1(17)   | 7.5(18)  | -8.1(18)  |
| C9'  | 40(2)    | 34(2)    | 50(2)    | 2.1(18)   | 7.1(18)  | 6.2(17)   |
| C10' | 35(2)    | 32(2)    | 38(2)    | -0.1(16)  | 8.4(16)  | -2.9(16)  |
| C11' | 43(2)    | 33(2)    | 33.6(19) | -2.0(16)  | 7.0(17)  | -6.7(17)  |
| C12' | 55(3)    | 81(4)    | 42(2)    | -8(2)     | -4(2)    | 7(2)      |
| C13' | 85(3)    | 38(2)    | 45(2)    | -7.2(19)  | 24(2)    | -13(2)    |
| C14' | 67(3)    | 42(2)    | 40(2)    | -1.5(18)  | 17(2)    | -14(2)    |
| C15' | 33.6(18) | 26.5(19) | 26.6(17) | -2.6(14)  | 5.8(15)  | -3.5(15)  |
| C16' | 35(2)    | 38(2)    | 44(2)    | -4.0(18)  | -1.2(17) | -3.9(17)  |
| C17' | 28.6(18) | 28(2)    | 41(2)    | -2.2(16)  | 6.7(16)  | -2.6(15)  |
| C18' | 57(2)    | 36(2)    | 34(2)    | -10.4(17) | 17.8(19) | -4.8(19)  |
| N1'  | 27.9(15) | 27.7(17) | 40.1(16) | 1.5(13)   | 13.6(13) | -1.0(12)  |
| N2'  | 29.7(15) | 22.4(15) | 34.4(15) | 1.3(12)   | 12.0(13) | -0.7(12)  |
| N3'  | 23.8(14) | 27.8(16) | 40.4(16) | -2.1(13)  | 9.0(13)  | 0.1(12)   |
| N4'  | 26.7(14) | 25.2(15) | 31.9(15) | 1.3(12)   | 10.7(12) | 0.5(12)   |
| O1'  | 29.0(13) | 38.6(16) | 35.1(14) | -3.7(12)  | 12.5(11) | -0.2(11)  |
| O2'  | 47.4(15) | 29.6(14) | 40.8(14) | -0.1(11)  | 5.3(12)  | -11.5(12) |
| O3'  | 30.3(13) | 41.5(15) | 46.5(15) | 13.8(12)  | 15.4(12) | -0.4(11)  |
| O4'  | 55.0(17) | 34.7(15) | 52.8(16) | -2.1(12)  | 22.5(14) | -16.3(13) |
| O5'  | 37.0(14) | 34.0(15) | 45.4(15) | 0.7(12)   | 6.6(12)  | 9.9(11)   |
| O6'  | 41.4(15) | 26.5(14) | 43.6(15) | 4.3(11)   | 0.3(12)  | 4.3(11)   |
| O7'  | 26.8(12) | 37.8(14) | 37.7(13) | -10.8(11) | 7.9(11)  | 4.3(11)   |
| S1'  | 27.9(4)  | 27.1(5)  | 34.7(5)  | 3.7(4)    | 5.8(4)   | -3.6(4)   |
| S2'  | 33.2(5)  | 26.6(5)  | 35.9(5)  | 0.7(4)    | 8.5(4)   | -1.9(4)   |
| S3'  | 27.8(4)  | 24.7(5)  | 32.2(4)  | -3.7(4)   | 4.3(4)   | 1.4(4)    |
| Co1' | 22.7(2)  | 23.9(2)  | 30.9(2)  | -0.63(19) | 8.43(19) | -0.04(18) |
| C1D  | 39(2)    | 17.6(18) | 36.7(19) | -1.2(14)  | 9.3(16)  | -1.7(15)  |
| C2D  | 55(2)    | 29(2)    | 45(2)    | -5.4(17)  | 18.8(19) | -4.9(18)  |
| C3D  | 53(2)    | 33(2)    | 45(2)    | -8.5(17)  | 15.1(19) | 0.1(19)   |
| C4D  | 88(4)    | 65(3)    | 68(3)    | -31(3)    | 42(3)    | -18(3)    |
| C5D  | 33.7(19) | 26.9(19) | 40(2)    | -0.2(15)  | 16.1(16) | -3.0(15)  |
| C6D  | 38(2)    | 29(2)    | 37.0(19) | -1.1(15)  | 13.9(16) | -2.9(16)  |
| C7D  | 44(2)    | 37(2)    | 42(2)    | -4.4(17)  | 18.0(18) | -7.2(18)  |
| C8D  | 57(3)    | 56(3)    | 42(2)    | 1(2)      | 17(2)    | -15(2)    |
| C9D  | 39(2)    | 27(2)    | 41(2)    | -6.5(16)  | 16.8(17) | -12.1(16) |
| C10D | 42(2)    | 27(2)    | 46(2)    | -9.0(16)  | 17.5(18) | -6.3(17)  |
| C11D | 42(2)    | 26(2)    | 45(2)    | -3.1(16)  | 15.3(18) | -9.4(16)  |
| C12D | 54(3)    | 46(3)    | 49(2)    | -6(2)     | 18(2)    | -16(2)    |
| C13D | 73(3)    | 19.4(18) | 39(2)    | 2.9(15)   | 22.6(18) | 5.0(17)   |
| C14D | 87(3)    | 38(2)    | 40(2)    | -0.5(17)  | 7(2)     | 19(2)     |

| Atom | $U_{11}$ | $U_{22}$ | $U_{33}$ | $U_{23}$ | $U_{13}$ | $U_{12}$ |
|------|----------|----------|----------|----------|----------|----------|
| C15D | 156(5)   | 45(3)    | 45(2)    | 11(2)    | 25(3)    | 44(3)    |
| C16D | 167(11)  | 66(7)    | 56(5)    | -7(5)    | 23(6)    | 2(7)     |
| C16E | 171(8)   | 81(7)    | 43(5)    | 0(5)     | 1(5)     | 70(6)    |
| N1D  | 39.4(16) | 16.9(14) | 34.4(15) | -1.8(11) | 14.1(13) | -2.0(12) |
| C1C  | 42(2)    | 26(2)    | 62(2)    | 2.6(17)  | 10.0(19) | 6.6(16)  |
| C2C  | 134(5)   | 43(3)    | 76(3)    | 18(2)    | 51(3)    | 32(3)    |
| C3C  | 143(5)   | 46(3)    | 85(4)    | 9(3)     | 50(4)    | 47(3)    |
| C4C  | 254(9)   | 62(4)    | 95(4)    | 3(3)     | 45(5)    | 37(5)    |
| C5C  | 28.3(17) | 30(2)    | 56(2)    | 4.1(17)  | 13.7(16) | -4.9(15) |
| C6C  | 38(2)    | 35(2)    | 55(2)    | 2.2(18)  | 12.3(18) | 2.7(17)  |
| C7C  | 37(2)    | 75(3)    | 73(3)    | 23(2)    | 10(2)    | -9(2)    |
| C8C  | 52(3)    | 64(3)    | 49(2)    | -6(2)    | 4(2)     | 7(2)     |
| C9C  | 28.8(19) | 33(2)    | 79(3)    | 9.9(19)  | 22.9(19) | 0.5(16)  |
| C10C | 49(2)    | 46(3)    | 84(3)    | 10(2)    | 34(2)    | 11(2)    |
| C11C | 42(2)    | 101(4)   | 77(3)    | 22(3)    | 24(2)    | 8(3)     |
| C12C | 89(4)    | 133(5)   | 91(4)    | 34(4)    | 50(3)    | 57(4)    |
| C13C | 41(2)    | 20.7(18) | 62(2)    | 3.2(16)  | 9.8(18)  | 5.9(15)  |
| C14C | 59(3)    | 36(2)    | 103(4)   | -17(2)   | -27(3)   | 17(2)    |
| C15C | 82(3)    | 47(3)    | 84(3)    | -15(2)   | -14(3)   | 39(2)    |
| C16C | 151(6)   | 80(5)    | 166(6)   | -46(4)   | -69(5)   | 47(4)    |
| N1C  | 30.8(15) | 20.6(15) | 59.2(19) | 5.3(13)  | 13.7(14) | 0.9(12)  |

**Table S19:** Bond Lengths in Å for **sad\_sq**.

| Atom | Atom | Length/Å | Atom | Atom | Length/Å |
|------|------|----------|------|------|----------|
| C1   | C2   | 1.512(5) | O6   | S3   | 1.442(3) |
| C1   | N1   | 1.471(4) | O7   | S3   | 1.456(3) |
| C2   | N2   | 1.478(4) | C1'  | C2'  | 1.510(5) |
| C3   | C4   | 1.521(5) | C1'  | N1'  | 1.474(4) |
| C3   | N1   | 1.482(4) | C2'  | N2'  | 1.488(4) |
| C4   | N3   | 1.473(4) | C3'  | C4'  | 1.511(5) |
| C5   | C6   | 1.524(5) | C3'  | N1'  | 1.477(4) |
| C5   | N1   | 1.469(4) | C4'  | N3'  | 1.481(4) |
| C6   | N4   | 1.470(4) | C5'  | C6'  | 1.514(5) |
| C7   | C8   | 1.541(5) | C5'  | N1'  | 1.483(4) |
| C7   | C9   | 1.527(5) | C6'  | N4'  | 1.474(4) |
| C7   | C10  | 1.522(5) | C7'  | C8'  | 1.531(5) |
| C7   | S1   | 1.815(4) | C7'  | C9'  | 1.533(5) |
| C11  | C12  | 1.522(5) | C7'  | C10' | 1.529(5) |
| C11  | C13  | 1.540(5) | C7'  | S1'  | 1.824(3) |
| C11  | C14  | 1.522(5) | C11' | C12' | 1.531(5) |
| C11  | S2   | 1.822(4) | C11' | C13' | 1.530(5) |
| C15  | C16  | 1.531(5) | C11' | C14' | 1.527(5) |
| C15  | C17  | 1.519(6) | C11' | S2'  | 1.821(4) |
| C15  | C18  | 1.532(6) | C15' | C16' | 1.530(5) |
| C15  | S3   | 1.831(4) | C15' | C17' | 1.524(5) |
| N1   | Co1  | 2.246(3) | C15' | C18' | 1.519(5) |
| N2   | S1   | 1.582(3) | C15' | S3'  | 1.824(3) |
| N2   | Co1  | 2.038(3) | N1'  | Co1' | 2.241(3) |
| N3   | S2   | 1.586(3) | N2'  | S1'  | 1.573(3) |
| N3   | Co1  | 2.014(3) | N2'  | Co1' | 2.043(3) |
| N4   | S3   | 1.570(3) | N3'  | S2'  | 1.577(3) |
| N4   | Co1  | 2.030(3) | N3'  | Co1' | 2.023(3) |
| O1   | Co1  | 2.134(3) | N4'  | S3'  | 1.578(3) |
| O2   | S1   | 1.450(3) | N4'  | Co1' | 2.032(3) |
| O3   | S1   | 1.459(3) | O1'  | Co1' | 2.125(2) |
| O4   | S2   | 1.458(3) | O2'  | S1'  | 1.454(2) |
| O5   | S2   | 1.449(3) | O3'  | S1'  | 1.454(2) |

| Atom | Atom | Length/Å |
|------|------|----------|
| O4'  | S2'  | 1.455(2) |
| O5'  | S2'  | 1.451(2) |
| O6'  | S3'  | 1.450(2) |
| O7'  | S3'  | 1.459(2) |
| C1D  | C2D  | 1.502(5) |
| C1D  | N1D  | 1.525(4) |
| C2D  | C3D  | 1.519(5) |
| C3D  | C4D  | 1.519(5) |
| C5D  | C6D  | 1.521(5) |
| C5D  | N1D  | 1.519(4) |
| C6D  | C7D  | 1.528(5) |
| C7D  | C8D  | 1.527(5) |
| C9D  | C10D | 1.524(5) |
| C9D  | N1D  | 1.526(4) |
| C10D | C11D | 1.522(5) |
| C11D | C12D | 1.510(5) |
| C13D | C14D | 1.517(6) |
| C13D | N1D  | 1.516(4) |
| C14D | C15D | 1.504(6) |

| Atom | Atom | Length/Å   |
|------|------|------------|
| C15D | C16D | 1.508(2)   |
| C15D | C16E | 1.5144(14) |
| C1C  | C2C  | 1.510(6)   |
| C1C  | N1C  | 1.531(5)   |
| C2C  | C3C  | 1.568(7)   |
| C3C  | C4C  | 1.410(8)   |
| C5C  | C6C  | 1.514(5)   |
| C5C  | N1C  | 1.513(4)   |
| C6C  | C7C  | 1.495(5)   |
| C7C  | C8C  | 1.491(6)   |
| C9C  | C10C | 1.517(6)   |
| C9C  | N1C  | 1.499(4)   |
| C10C | C11C | 1.521(6)   |
| C11C | C12C | 1.488(7)   |
| C13C | C14C | 1.521(5)   |
| C13C | N1C  | 1.526(4)   |
| C14C | C15C | 1.537(6)   |
| C15C | C16C | 1.432(7)   |

**Table S20:** Bond Angles in ° for **sad\_sq**.

| Atom | Atom | Atom | Angle/°    |
|------|------|------|------------|
| N1   | C1   | C2   | 109.3(3)   |
| N2   | C2   | C1   | 108.9(3)   |
| N1   | C3   | C4   | 109.3(3)   |
| N3   | C4   | C3   | 108.7(3)   |
| N1   | C5   | C6   | 110.3(3)   |
| N4   | C6   | C5   | 108.5(3)   |
| C8   | C7   | S1   | 107.6(3)   |
| C9   | C7   | C8   | 110.7(3)   |
| C9   | C7   | S1   | 109.6(3)   |
| C10  | C7   | C8   | 110.2(3)   |
| C10  | C7   | C9   | 110.7(3)   |
| C10  | C7   | S1   | 108.0(3)   |
| C12  | C11  | C13  | 110.3(3)   |
| C12  | C11  | S2   | 109.1(3)   |
| C13  | C11  | S2   | 107.5(3)   |
| C14  | C11  | C12  | 110.8(3)   |
| C14  | C11  | C13  | 110.2(3)   |
| C14  | C11  | S2   | 108.9(3)   |
| C16  | C15  | C18  | 109.8(4)   |
| C16  | C15  | S3   | 106.8(3)   |
| C17  | C15  | C16  | 111.7(4)   |
| C17  | C15  | C18  | 111.5(3)   |
| C17  | C15  | S3   | 108.7(3)   |
| C18  | C15  | S3   | 108.2(3)   |
| C1   | N1   | C3   | 111.4(3)   |
| C1   | N1   | Co1  | 107.49(19) |
| C3   | N1   | Co1  | 106.37(19) |
| C5   | N1   | C1   | 112.4(3)   |
| C5   | N1   | C3   | 112.3(3)   |
| C5   | N1   | Co1  | 106.44(19) |
| C2   | N2   | S1   | 117.0(2)   |
| C2   | N2   | Co1  | 112.5(2)   |
| S1   | N2   | Co1  | 130.50(18) |
| C4   | N3   | S2   | 116.3(2)   |

| Atom | Atom | Atom | Angle/°    |
|------|------|------|------------|
| C4   | N3   | Co1  | 111.5(2)   |
| S2   | N3   | Co1  | 126.75(16) |
| C6   | N4   | S3   | 118.6(2)   |
| C6   | N4   | Co1  | 110.7(2)   |
| S3   | N4   | Co1  | 130.51(18) |
| N2   | S1   | C7   | 109.47(16) |
| O2   | S1   | C7   | 105.24(18) |
| O2   | S1   | N2   | 112.37(17) |
| O2   | S1   | O3   | 116.03(19) |
| O3   | S1   | C7   | 104.99(17) |
| O3   | S1   | N2   | 108.30(17) |
| N3   | S2   | C11  | 108.43(16) |
| O4   | S2   | C11  | 105.06(17) |
| O4   | S2   | N3   | 111.60(16) |
| O5   | S2   | C11  | 105.88(17) |
| O5   | S2   | N3   | 108.72(15) |
| O5   | S2   | O4   | 116.67(17) |
| N4   | S3   | C15  | 109.52(16) |
| O6   | S3   | C15  | 106.24(19) |
| O6   | S3   | N4   | 111.88(17) |
| O6   | S3   | O7   | 116.01(18) |
| O7   | S3   | C15  | 103.85(18) |
| O7   | S3   | N4   | 108.86(16) |
| N2   | Co1  | N1   | 80.10(11)  |
| N2   | Co1  | O1   | 97.12(12)  |
| N3   | Co1  | N1   | 81.18(10)  |
| N3   | Co1  | N2   | 119.19(11) |
| N3   | Co1  | N4   | 119.46(11) |
| N3   | Co1  | O1   | 101.67(11) |
| N4   | Co1  | N1   | 81.12(11)  |
| N4   | Co1  | N2   | 113.83(11) |
| N4   | Co1  | O1   | 98.63(12)  |
| O1   | Co1  | N1   | 176.78(11) |
| N1'  | C1'  | C2'  | 110.0(3)   |

| Atom | Atom | Atom | Angle/°    | Atom | Atom | Atom | Angle/°    |
|------|------|------|------------|------|------|------|------------|
| N2'  | C2'  | C1'  | 108.6(3)   | O6'  | S3'  | N4'  | 112.55(15) |
| N1'  | C3'  | C4'  | 109.1(3)   | O6'  | S3'  | O7'  | 115.72(15) |
| N3'  | C4'  | C3'  | 108.5(3)   | O7'  | S3'  | C15' | 104.25(14) |
| N1'  | C5'  | C6'  | 110.6(3)   | O7'  | S3'  | N4'  | 108.70(14) |
| N4'  | C6'  | C5'  | 109.4(3)   | N2'  | Co1' | N1'  | 80.55(10)  |
| C8'  | C7'  | C9'  | 109.9(3)   | N2'  | Co1' | O1'  | 97.25(10)  |
| C8'  | C7'  | S1'  | 107.6(2)   | N3'  | Co1' | N1'  | 80.68(11)  |
| C9'  | C7'  | S1'  | 108.8(2)   | N3'  | Co1' | N2'  | 118.30(11) |
| C10' | C7'  | C8'  | 110.5(3)   | N3'  | Co1' | N4'  | 120.52(11) |
| C10' | C7'  | C9'  | 111.1(3)   | N3'  | Co1' | O1'  | 102.02(10) |
| C10' | C7'  | S1'  | 108.8(2)   | N4'  | Co1' | N1'  | 81.43(10)  |
| C12' | C11' | S2'  | 108.4(3)   | N4'  | Co1' | N2'  | 113.78(11) |
| C13' | C11' | C12' | 111.3(3)   | N4'  | Co1' | O1'  | 97.87(10)  |
| C13' | C11' | S2'  | 107.6(3)   | O1'  | Co1' | N1'  | 177.14(10) |
| C14' | C11' | C12' | 110.9(3)   | C2D  | C1D  | N1D  | 115.4(3)   |
| C14' | C11' | C13' | 110.5(3)   | C1D  | C2D  | C3D  | 111.5(3)   |
| C14' | C11' | S2'  | 108.1(2)   | C2D  | C3D  | C4D  | 113.3(3)   |
| C16' | C15' | S3'  | 107.3(2)   | N1D  | C5D  | C6D  | 115.5(3)   |
| C17' | C15' | C16' | 110.6(3)   | C5D  | C6D  | C7D  | 110.1(3)   |
| C17' | C15' | S3'  | 108.7(2)   | C8D  | C7D  | C6D  | 112.1(3)   |
| C18' | C15' | C16' | 110.6(3)   | C10D | C9D  | N1D  | 115.0(3)   |
| C18' | C15' | C17' | 110.6(3)   | C11D | C10D | C9D  | 111.3(3)   |
| C18' | C15' | S3'  | 109.1(2)   | C12D | C11D | C10D | 112.8(3)   |
| C1'  | N1'  | C3'  | 111.5(3)   | N1D  | C13D | C14D | 115.9(3)   |
| C1'  | N1'  | C5'  | 112.1(3)   | C15D | C14D | C13D | 110.9(4)   |
| C1'  | N1'  | Co1' | 107.20(19) | C14D | C15D | C16D | 117.9(6)   |
| C3'  | N1'  | C5'  | 112.1(3)   | C14D | C15D | C16E | 116.1(6)   |
| C3'  | N1'  | Co1' | 107.0(2)   | C1D  | N1D  | C9D  | 108.8(2)   |
| C5'  | N1'  | Co1' | 106.6(2)   | C5D  | N1D  | C1D  | 109.0(2)   |
| C2'  | N2'  | S1'  | 116.4(2)   | C5D  | N1D  | C9D  | 110.3(2)   |
| C2'  | N2'  | Co1' | 111.9(2)   | C13D | N1D  | C1D  | 110.6(3)   |
| S1'  | N2'  | Co1' | 131.21(16) | C13D | N1D  | C5D  | 108.8(3)   |
| C4'  | N3'  | S2'  | 117.0(2)   | C13D | N1D  | C9D  | 109.3(3)   |
| C4'  | N3'  | Co1' | 111.5(2)   | C2C  | C1C  | N1C  | 116.6(3)   |
| S2'  | N3'  | Co1' | 125.64(15) | C1C  | C2C  | C3C  | 107.6(4)   |
| C6'  | N4'  | S3'  | 118.3(2)   | C4C  | C3C  | C2C  | 115.9(5)   |
| C6'  | N4'  | Co1' | 110.8(2)   | N1C  | C5C  | C6C  | 116.5(3)   |
| S3'  | N4'  | Co1' | 130.85(15) | C7C  | C6C  | C5C  | 110.9(3)   |
| N2'  | S1'  | C7'  | 109.12(15) | C8C  | C7C  | C6C  | 117.3(4)   |
| O2'  | S1'  | C7'  | 105.53(15) | N1C  | C9C  | C10C | 115.7(3)   |
| O2'  | S1'  | N2'  | 112.16(15) | C9C  | C10C | C11C | 110.2(4)   |
| O3'  | S1'  | C7'  | 104.72(15) | C12C | C11C | C10C | 115.0(5)   |
| O3'  | S1'  | N2'  | 109.08(14) | C14C | C13C | N1C  | 116.1(3)   |
| O3'  | S1'  | O2'  | 115.75(15) | C13C | C14C | C15C | 109.2(4)   |
| N3'  | S2'  | C11' | 108.52(16) | C16C | C15C | C14C | 117.6(5)   |
| O4'  | S2'  | C11' | 105.10(16) | C5C  | N1C  | C1C  | 111.0(3)   |
| O4'  | S2'  | N3'  | 111.78(15) | C5C  | N1C  | C13C | 105.5(3)   |
| O5'  | S2'  | C11' | 105.71(16) | C9C  | N1C  | C1C  | 105.6(3)   |
| O5'  | S2'  | N3'  | 108.76(15) | C9C  | N1C  | C5C  | 112.0(3)   |
| O5'  | S2'  | O4'  | 116.47(16) | C9C  | N1C  | C13C | 111.4(3)   |
| N4'  | S3'  | C15' | 109.65(15) | C13C | N1C  | C1C  | 111.5(3)   |
| O6'  | S3'  | C15' | 105.49(15) |      |      |      |            |

**Table S21:** Hydrogen Fractional Atomic Coordinates ( $\times 10^4$ ) and Equivalent Isotropic Displacement Parameters ( $\text{\AA}^2 \times 10^3$ ) for **sad\_sq**.  $U_{eq}$  is defined as 1/3 of the trace of the orthogonalised  $U_{ij}$ .

| Atom | x | y | z | $U_{eq}$ |
|------|---|---|---|----------|
|------|---|---|---|----------|

| Atom | x         | y        | z        | $U_{eq}$ |
|------|-----------|----------|----------|----------|
| H1C  | 2640(30)  | 4264(18) | 2470(13) | 84(12)   |
| H1D  | 2590(30)  | 4764(6)  | 2090(20) | 84(12)   |
| H1A  | 5818      | 5183     | 2675     | 41       |
| H1B  | 6137      | 5247     | 3390     | 41       |
| H2A  | 4798      | 5475     | 3429     | 47       |
| H2B  | 5003      | 5825     | 2926     | 47       |
| H3A  | 5995      | 3910     | 3042     | 37       |
| H3B  | 6518      | 4382     | 2915     | 37       |
| H4A  | 5545      | 4523     | 1965     | 40       |
| H4B  | 5799      | 3936     | 1991     | 40       |
| H5A  | 5422      | 4770     | 3980     | 41       |
| H5B  | 6103      | 4351     | 3967     | 41       |
| H6A  | 5062      | 3723     | 3638     | 45       |
| H6B  | 4909      | 3986     | 4218     | 45       |
| H8A  | 2610      | 5992     | 977      | 89       |
| H8B  | 3283      | 6184     | 661      | 89       |
| H8C  | 3186      | 6467     | 1245     | 89       |
| H9A  | 4706      | 6333     | 1831     | 74       |
| H9B  | 4857      | 6084     | 1245     | 74       |
| H9C  | 5110      | 5783     | 1867     | 74       |
| H10A | 4190      | 5022     | 1412     | 64       |
| H10B | 4005      | 5303     | 779      | 64       |
| H10C | 3254      | 5120     | 1021     | 64       |
| H12A | 4687      | 4113     | 887      | 79       |
| H12B | 4404      | 3760     | 306      | 79       |
| H12C | 5134      | 3581     | 876      | 79       |
| H13A | 4341      | 2759     | 890      | 85       |
| H13B | 3582      | 2940     | 342      | 85       |
| H13C | 3425      | 2776     | 962      | 85       |
| H14A | 2725      | 3621     | 993      | 74       |
| H14B | 2917      | 3821     | 398      | 74       |
| H14C | 3221      | 4139     | 1006     | 74       |
| H16A | 1869      | 4498     | 4007     | 116      |
| H16B | 2246      | 4857     | 4571     | 116      |
| H16C | 2476      | 4269     | 4610     | 116      |
| H17A | 3449      | 5211     | 3553     | 88       |
| H17B | 2812      | 5436     | 3880     | 88       |
| H17C | 2490      | 5061     | 3323     | 88       |
| H18A | 4025      | 4458     | 4896     | 88       |
| H18B | 3811      | 5047     | 4897     | 88       |
| H18C | 4380      | 4844     | 4501     | 88       |
| H1'C | -1970(30) | 5038(6)  | 3044(19) | 86(17)   |
| H1'D | -2310(20) | 5526(14) | 2627(15) | 78(16)   |
| H1'A | 744       | 4659     | 2383     | 44       |
| H1'B | 485       | 4595     | 1668     | 44       |
| H2'A | -865      | 4338     | 1645     | 41       |
| H2'B | -233      | 3997     | 2142     | 41       |
| H3'A | 563       | 5933     | 2016     | 44       |
| H3'B | 1209      | 5473     | 2126     | 44       |
| H4'A | 1029      | 5311     | 3081     | 45       |
| H4'B | 1239      | 5901     | 3058     | 45       |
| H5'A | -708      | 5052     | 1080     | 43       |
| H5'B | -55       | 5495     | 1092     | 43       |
| H6'A | -881      | 6090     | 1406     | 41       |
| H6'B | -1482     | 5801     | 841      | 41       |
| H8'A | -1101     | 3750     | 4080     | 64       |
| H8'B | -191      | 3519     | 4338     | 64       |
| H8'C | -804      | 3300     | 3732     | 64       |

| Atom | x     | y    | z    | $U_{eq}$ |
|------|-------|------|------|----------|
| H9'A | 293   | 3474 | 3177 | 64       |
| H9'B | 901   | 3679 | 3794 | 64       |
| H9'C | 689   | 4026 | 3207 | 64       |
| H10H | 127   | 4752 | 3713 | 53       |
| H10I | 404   | 4437 | 4325 | 53       |
| H10J | -531  | 4631 | 4072 | 53       |
| H12J | 1054  | 5742 | 4158 | 94       |
| H12K | 1189  | 6074 | 4752 | 94       |
| H12L | 1448  | 6295 | 4191 | 94       |
| H13F | 539   | 7074 | 4163 | 83       |
| H13G | 237   | 6872 | 4713 | 83       |
| H13H | -429  | 7010 | 4091 | 83       |
| H14H | -1046 | 6144 | 4083 | 74       |
| H14I | -354  | 5944 | 4663 | 74       |
| H14J | -523  | 5648 | 4040 | 74       |
| H16M | -4293 | 5166 | 1080 | 63       |
| H16N | -4298 | 4808 | 525  | 63       |
| H16O | -4168 | 5404 | 481  | 63       |
| H17D | -2292 | 4559 | 1620 | 50       |
| H17E | -3157 | 4293 | 1293 | 50       |
| H17F | -3104 | 4697 | 1814 | 50       |
| H18D | -2842 | 5201 | 194  | 62       |
| H18E | -2923 | 4607 | 296  | 62       |
| H18F | -2101 | 4903 | 654  | 62       |
| H1DA | 3228  | 7962 | 3479 | 38       |
| H1DB | 2391  | 8174 | 3032 | 38       |
| H2DA | 2488  | 7550 | 4057 | 50       |
| H2DB | 1624  | 7700 | 3585 | 50       |
| H3DA | 1873  | 8571 | 3832 | 52       |
| H3DB | 2764  | 8439 | 4278 | 52       |
| H4DA | 2117  | 8012 | 4931 | 105      |
| H4DB | 1224  | 8138 | 4483 | 105      |
| H4DC | 1800  | 8585 | 4837 | 105      |
| H5DA | 3245  | 7191 | 2266 | 39       |
| H5DB | 3725  | 7616 | 2721 | 39       |
| H6DA | 2928  | 8260 | 2154 | 41       |
| H6DB | 2271  | 7866 | 1761 | 41       |
| H7DA | 3950  | 8004 | 1700 | 48       |
| H7DB | 3397  | 7536 | 1378 | 48       |
| H8DA | 2922  | 8571 | 1068 | 77       |
| H8DB | 2453  | 8087 | 718  | 77       |
| H8DC | 3363  | 8226 | 685  | 77       |
| H9DA | 1355  | 7225 | 2737 | 41       |
| H9DB | 1465  | 7674 | 2308 | 41       |
| H10D | 1959  | 7047 | 1714 | 45       |
| H10E | 1707  | 6616 | 2112 | 45       |
| H11A | 293   | 6833 | 1749 | 45       |
| H11B | 505   | 7325 | 1422 | 45       |
| H12D | 793   | 6323 | 1054 | 73       |
| H12E | 857   | 6831 | 698  | 73       |
| H12F | -26   | 6637 | 734  | 73       |
| H2   | 2846  | 6645 | 2962 | 51       |
| H13D | 2517  | 6868 | 3488 | 51       |
| H14D | 4186  | 6985 | 3416 | 69       |
| H14E | 3863  | 7241 | 3931 | 69       |
| H15A | 3913  | 6170 | 3754 | 99       |
| H15B | 3595  | 6426 | 4268 | 99       |
| H15D | 4331  | 6204 | 3936 | 99       |



| Atom | x    | y    | z    | $U_{eq}$ |
|------|------|------|------|----------|
| H16D | 3038 | 6369 | 4423 | 147      |
| H16E | 3786 | 6700 | 4828 | 147      |
| H16F | 3877 | 6100 | 4798 | 147      |
| H16G | 5287 | 6427 | 4240 | 157      |
| H16H | 4936 | 6110 | 4699 | 157      |
| H16I | 4981 | 6713 | 4744 | 157      |
| H1CA | 3139 | 1652 | 2930 | 53       |
| H1CB | 2261 | 1792 | 2478 | 53       |
| H2CA | 3821 | 2140 | 2350 | 96       |
| H2CB | 2939 | 2293 | 1898 | 96       |
| H3CA | 3565 | 1257 | 2090 | 105      |
| H3CB | 2652 | 1383 | 1681 | 105      |
| H4CA | 3161 | 1756 | 989  | 207      |
| H4CB | 3545 | 1201 | 1128 | 207      |
| H4CC | 4089 | 1684 | 1408 | 207      |
| H5CA | 3542 | 2888 | 3644 | 45       |
| H5CB | 3923 | 2669 | 3142 | 45       |
| H6CA | 3859 | 2101 | 4181 | 52       |
| H6CB | 4278 | 1903 | 3686 | 52       |
| H7CA | 5267 | 2561 | 3940 | 76       |
| H7CB | 4845 | 2769 | 4425 | 76       |
| H8CA | 6120 | 2311 | 4836 | 86       |
| H8CB | 5630 | 1807 | 4563 | 86       |
| H8CC | 5366 | 2118 | 5069 | 86       |
| H9CA | 2540 | 1885 | 3699 | 54       |
| H9CB | 1704 | 2079 | 3234 | 54       |
| H10F | 1814 | 2864 | 3752 | 68       |
| H10G | 2680 | 2691 | 4206 | 68       |
| H11C | 1118 | 2197 | 4109 | 86       |
| H11D | 1979 | 2013 | 4553 | 86       |
| H12G | 1209 | 2464 | 5082 | 149      |
| H12H | 1211 | 2952 | 4675 | 149      |
| H12I | 2059 | 2753 | 5126 | 149      |
| H13E | 2283 | 3118 | 2969 | 51       |
| H5   | 2667 | 2957 | 2444 | 51       |
| H14F | 1052 | 2653 | 2515 | 92       |
| H14G | 1441 | 2454 | 2003 | 92       |
| H15C | 1071 | 3502 | 2174 | 95       |
| H15E | 1533 | 3331 | 1697 | 95       |
| H16J | 374  | 2992 | 1097 | 234      |
| H16K | 129  | 3538 | 1289 | 234      |
| H16L | -98  | 3041 | 1601 | 234      |

**Table S22:** Hydrogen Bond information for **sad\_sq**.

| D    | H    | A                | d(D-H)/Å  | d(H-A)/Å  | d(D-A)/Å | D-H-A/deg |
|------|------|------------------|-----------|-----------|----------|-----------|
| O1   | H1D  | O3               | 0.977(16) | 1.771(16) | 2.683(4) | 154(4)    |
| O1'  | H1'C | O3'              | 0.957(16) | 1.794(15) | 2.704(3) | 158(4)    |
| O1'  | H1'D | O7'              | 0.941(18) | 1.82(2)   | 2.741(3) | 165(4)    |
| C1D  | H1DB | O2' <sup>1</sup> | 0.97      | 2.27      | 3.177(4) | 155.1     |
| C9D  | H9DA | O4'              | 0.97      | 2.28      | 3.193(4) | 157.4     |
| C13D | H2   | O2               | 0.97      | 2.29      | 3.118(5) | 143.4     |

-----●  
<sup>1</sup>-X,1/2+Y,1/2-Z

Submitted by: **Christian Wallen**  
Emory University

Solved by: **Thomas C. Pickel**

Sample ID: **CMW04BuCoBus**

## Crystal Data and Experimental

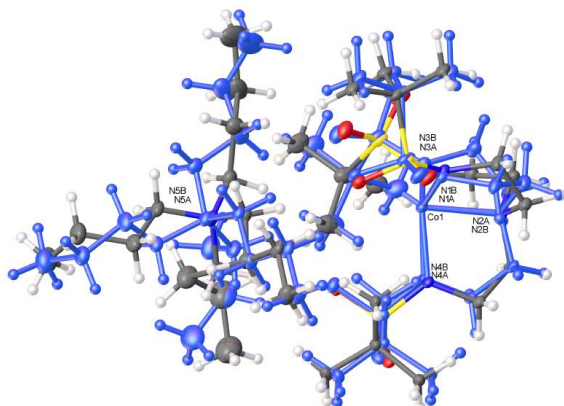

**Experimental.** Single violet prism-shaped crystals of (**cmw04bucobus**) were recrystallised from --•by vapor diffusion. A suitable crystal (0.57×0.48×0.24 mm) was selected and mounted on a loop with paratone oil on a Bruker APEX-II CCD diffractometer. The crystal was cooled to  $T = 100(2)$  K during data collection. The structure was solved with the **ShelXT** (Sheldrick, 2015) structure solution program using combined Patterson and dual-space recycling methods and by using **Olex2** (Dolomanov et al., 2009) as the graphical interface. The crystal structure was refined with version of **ShelXL** (Sheldrick, 2008) using Least Squares minimisation.

**Crystal Data.**  $C_{34}H_{75}CoN_5O_6S_3$ ,  $M_r = 805.10$ , monoclinic,  $P2_1/c$  (No. 14),  $a = 19.505(2)$  Å,  $b = 11.3473(14)$  Å,  $c = 19.833(2)$  Å,  $\beta = 99.185(2)^\circ$ ,  $\alpha = \gamma = 90^\circ$ ,  $V = 4333.3(9)$  Å<sup>3</sup>,  $T = 100(2)$  K,  $Z = 4$ ,  $Z' = 1$ ,  $\mu(\text{MoK}\alpha) = 0.585$ , 51543 reflections measured, 11684 unique ( $R_{int} = 0.0614$ ) which were used in all calculations. The final  $wR_2$  was 0.2206 (all data) and  $R_1$  was 0.0835 ( $I > 2\sigma(I)$ ).

| Compound                     | cmw04bucobus              |
|------------------------------|---------------------------|
| Formula                      | $C_{34}H_{75}CoN_5O_6S_3$ |
| $D_{calc.}/g\text{ cm}^{-3}$ | 1.234                     |
| $\mu/\text{mm}^{-1}$         | 0.585                     |
| Formula Weight               | 805.10                    |
| Colour                       | violet                    |
| Shape                        | prism                     |
| Max Size/mm                  | 0.57                      |
| Mid Size/mm                  | 0.48                      |
| Min Size/mm                  | 0.24                      |
| $T/\text{K}$                 | 100(2)                    |
| Crystal System               | monoclinic                |
| Space Group                  | $P2_1/c$                  |
| $a/\text{Å}$                 | 19.505(2)                 |
| $b/\text{Å}$                 | 11.3473(14)               |
| $c/\text{Å}$                 | 19.833(2)                 |
| $\alpha/^\circ$              | 90                        |
| $\beta/^\circ$               | 99.185(2)                 |
| $\gamma/^\circ$              | 90                        |
| $V/\text{Å}^3$               | 4333.3(9)                 |
| $Z$                          | 4                         |
| $Z'$                         | 1                         |
| $\Theta_{min}/^\circ$        | 2.074                     |
| $\Theta_{max}/^\circ$        | 29.199                    |
| Measured Refl.               | 51543                     |
| Independent Refl.            | 11684                     |
| $I > 2\sigma(I)$             | 8299                      |
| $R_{int}$                    | 0.0614                    |
| Parameters                   | 848                       |
| Restraints                   | 1142                      |
| Largest Peak                 | 1.584                     |
| Deepest Hole                 | -1.143                    |
| GooF                         | 1.080                     |
| $wR_2$ (all data)            | 0.2206                    |
| $wR_2$                       | 0.1969                    |
| $R_1$ (all data)             | 0.1176                    |
| $R_1$                        | 0.0835                    |
| CCDC #                       | 1434434                   |

## Structure Quality Indicators

|                     |                          |                    |                           |                  |
|---------------------|--------------------------|--------------------|---------------------------|------------------|
| <b>Reflections:</b> | $d_{\text{min}}$<br>0.73 | $I/\sigma$<br>18.3 | $R_{\text{int}}$<br>6.14% | complete<br>100% |
| <b>Refinement:</b>  | Shift<br>0.004           | Max Peak<br>1.6    | Min Peak<br>-1.1          | Goof<br>1.080    |

A violet prism-shaped crystal with dimensions 0.57×0.48×0.24 mm was mounted on a loop with paratone oil. X-ray diffraction data were collected using a Bruker APEX-II CCD diffractometer equipped with an Oxford Cryosystems low-temperature apparatus operating at  $T = 100(2)$  K.

Data were measured using  $\phi$  and  $\omega$  scans using MoK $_{\alpha}$  radiation (fine-focus sealed tube, 45 kV, 35 mA). The total number of runs and images was based on the strategy calculation from the program **APEX2** (Bruker, 2014). The maximum resolution achieved was  $\theta = 29.199^\circ$ .

Unit cell indexing was performed by using the **APEX2** (Bruker, 2014) software and refined using **SAINT** (Bruker, V8.34A, 2013) on 9806 reflections, 19 percent of the observed reflections. Data reduction, scaling and absorption corrections were performed using **SAINT** (Bruker, V8.34A, 2013) and **SADABS-2014/5** (Bruker, 2014) was used for absorption correction.  $wR_2(\text{int})$  was 0.0821 before and 0.0579 after correction. The ratio of minimum to maximum transmission is 0.8248. The  $\lambda/2$  correction factor is 0.00150. The software also corrects for Lorentz polarisation. The final completeness is 99.9% out to  $29.199^\circ$  in  $\theta$ . The absorption coefficient ( $\mu$ ) of this material is 0.585 and the minimum and maximum transmissions are 0.6151 and 0.7458.

The structure was solved in the space group P1 with the **ShelXT** (Sheldrick, 2015) structure solution program using combined Patterson and dual-space recycling methods. The space group P2 $_1$ /c (# 14) was determined by **ShelXT** (Sheldrick, 2015) structure solution program. The crystal structure was refined by Least Squares using version 2014/7 of **ShelXL** (Sheldrick, 2008). All non-hydrogen atoms were refined anisotropically. Hydrogen atom positions were calculated geometrically and refined using the riding model.

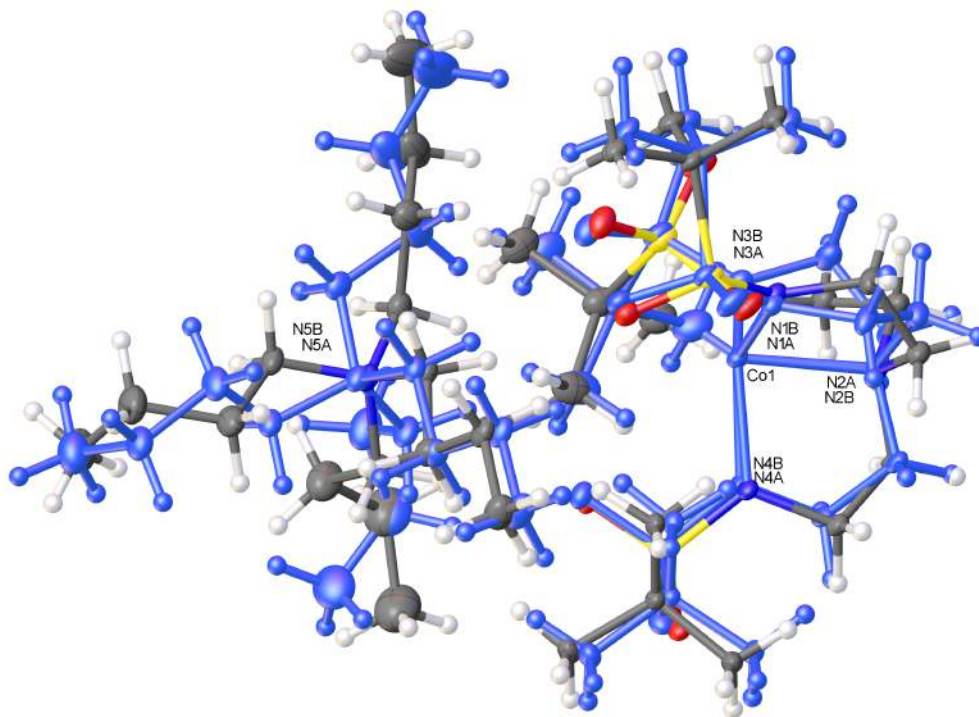

**Figure S19:** Plot of the asymmetric unit with the second disorder component shown in blue.

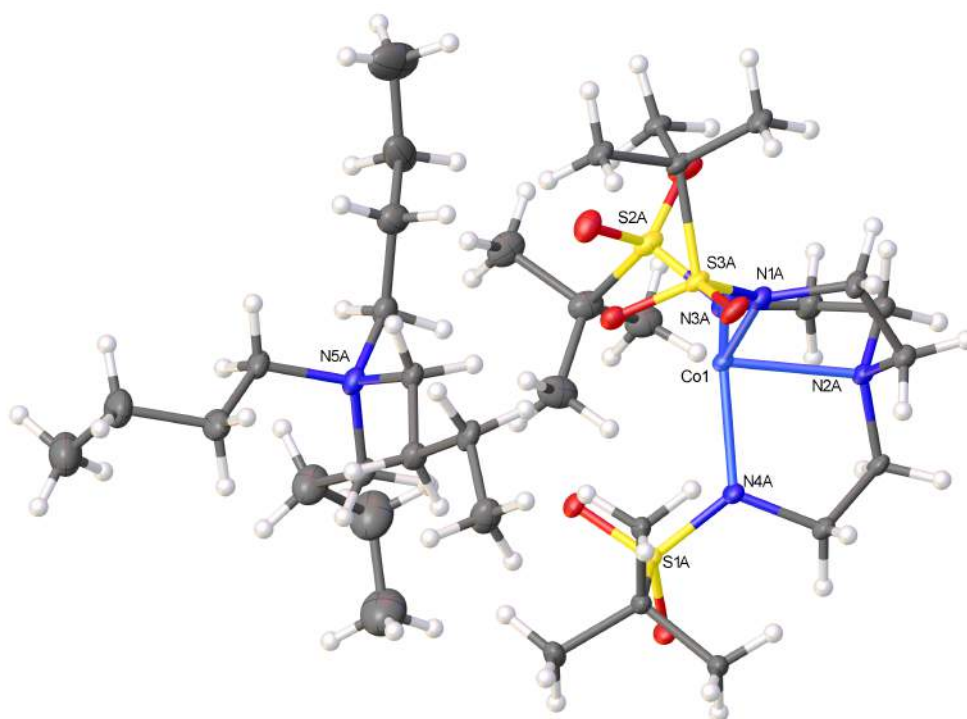

**FigureS20:** Plot of the asymmetric unit with the major disorder component shown only.

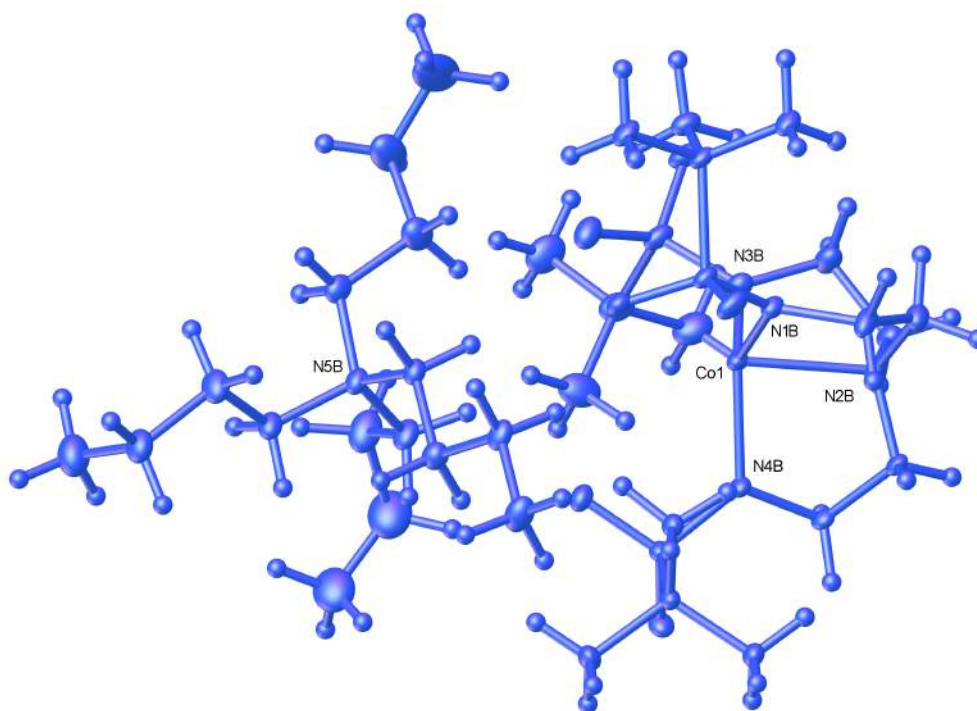

**Figure S21:** Plot of the asymmetric unit with the minor disorder component shown only.

There are two independent molecules in the asymmetric unit.

## Data Plots: Diffraction Data

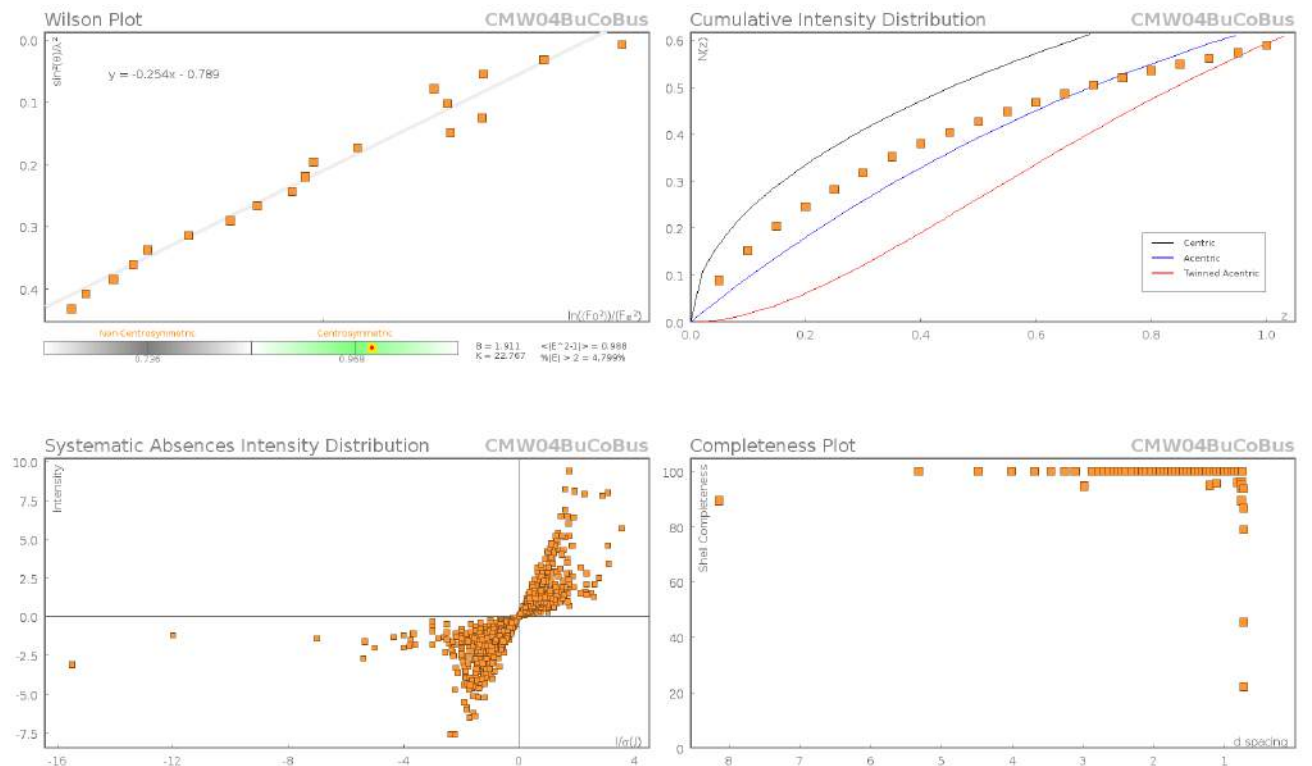

## Data Plots: Refinement and Data

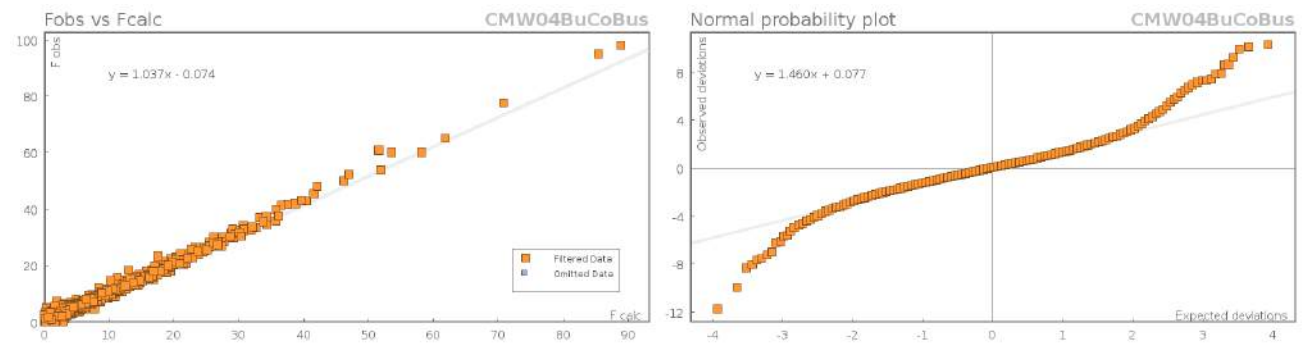

## Reflection Statistics

|                                        |              |                                        |                 |
|----------------------------------------|--------------|----------------------------------------|-----------------|
| Total reflections (after filtering)    | 52935        | Unique reflections                     | 11684           |
| Completeness                           | 0.995        | Mean $I/\sigma$                        | 12.23           |
| hk <sub>sub</sub> >max</sub> collected | (24, 15, 27) | hk <sub>sub</sub> >min</sub> collected | (-26, -15, -27) |
| hkl <sub>max</sub> used                | (26, 15, 27) | hkl <sub>min</sub> used                | (-26, 0, 0)     |
| Lim d <sub>max</sub> collected         | 100.0        | Lim d <sub>min</sub> collected         | 0.36            |
| d <sub>max</sub> used                  | 14.98        | d <sub>min</sub> used                  | 0.73            |
| Friedel pairs                          | 13977        | Friedel pairs merged                   | 1               |
| Inconsistent equivalents               | 0            | R <sub>int</sub>                       | 0.0614          |
| R <sub>sigma</sub>                     | 0.0547       | Intensity transformed                  | 0               |
| Omitted reflections                    | 0            | Omitted by user (OMIT hkl)             | 0               |

Multiplicity (22662, 12930, 1471) Maximum multiplicity 12  
 Removed systematic absences 1392 Filtered off (Shel/OMIT) 0

## Images of the Crystal on the Diffractometer

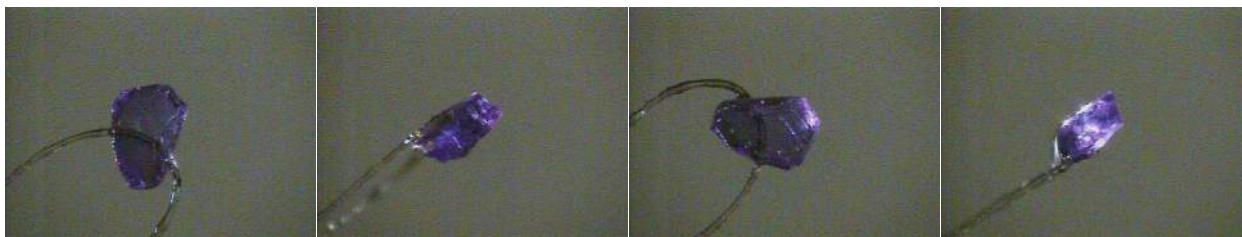

**Table S23:** Fractional Atomic Coordinates ( $\times 10^4$ ) and Equivalent Isotropic Displacement Parameters ( $\text{\AA}^2 \times 10^3$ ) for **cmw04bucobus**.  $U_{eq}$  is defined as 1/3 of the trace of the orthogonalised  $U_{ij}$ .

| Atom | x          | y        | z          | $U_{eq}$ |
|------|------------|----------|------------|----------|
| C1B  | 9408(3)    | 3687(6)  | 4595(3)    | 35.8(15) |
| C2B  | 9146(3)    | 2693(5)  | 4989(3)    | 34.9(13) |
| C3B  | 8039(3)    | 2114(5)  | 5367(3)    | 32.8(13) |
| C4B  | 7575(4)    | 1840(5)  | 4687(3)    | 40.3(15) |
| C5B  | 8730(3)    | 3741(5)  | 5930(2)    | 23.9(10) |
| C6B  | 8160(3)    | 4594(5)  | 6022(2)    | 24.9(11) |
| C7B  | 8428(3)    | 7551(4)  | 5446(3)    | 25.3(8)  |
| C8B  | 8823(4)    | 7311(7)  | 4855(4)    | 27.1(17) |
| C9B  | 8142(4)    | 8808(5)  | 5410(5)    | 34.7(16) |
| C10B | 8902(4)    | 7359(7)  | 6129(4)    | 29.3(15) |
| C11B | 5902(3)    | 3361(7)  | 4296(4)    | 41.2(13) |
| C12B | 5231(3)    | 3208(10) | 3784(5)    | 56(2)    |
| C13B | 5995(4)    | 4625(8)  | 4536(6)    | 54.3(19) |
| C14B | 5905(5)    | 2527(10) | 4906(4)    | 53.3(19) |
| C15B | 8858(4)    | 3991(6)  | 2763(2)    | 24.9(10) |
| C16B | 8191(6)    | 3260(9)  | 2715(4)    | 31.5(18) |
| C17B | 9497(6)    | 3206(9)  | 2844(4)    | 33.0(17) |
| C18B | 8840(6)    | 4787(8)  | 2139(3)    | 32.9(17) |
| N1B  | 8810(2)    | 4209(5)  | 4147(2)    | 24.5(7)  |
| N2B  | 8528(2)    | 3076(3)  | 5284.9(18) | 24.6(6)  |
| N3B  | 7307(2)    | 2958(4)  | 4390(2)    | 29.3(9)  |
| N4B  | 7968(3)    | 5244(4)  | 5377(2)    | 23.8(8)  |
| O1B  | 7293(3)    | 6769(5)  | 4707(3)    | 29.9(13) |
| O2B  | 7356(3)    | 6795(5)  | 5965(3)    | 32.9(14) |
| O3B  | 6651(3)    | 3897(6)  | 3367(3)    | 39.6(10) |
| O4B  | 6463(3)    | 1784(5)  | 3581(3)    | 40.6(11) |
| O5B  | 8311(4)    | 5730(5)  | 3357(3)    | 31.0(13) |
| O6B  | 9590(3)    | 5513(7)  | 3577(3)    | 36.4(14) |
| S1B  | 7692.5(19) | 6555(2)  | 5375(2)    | 24.1(6)  |
| S2B  | 6614.9(15) | 2960(4)  | 3851.0(15) | 31.4(3)  |
| S3B  | 8911(2)    | 4965(3)  | 3501.6(15) | 24.6(6)  |
| C1A  | 9299(6)    | 3193(10) | 4430(5)    | 32(2)    |
| C2A  | 9274(4)    | 3122(10) | 5184(4)    | 29.6(17) |
| C3A  | 8195(5)    | 1943(6)  | 5163(5)    | 32.3(18) |
| C4A  | 7406(5)    | 2100(10) | 4996(5)    | 37.4(19) |
| C5A  | 8477(5)    | 3535(7)  | 6001(3)    | 23.9(10) |
| C6A  | 8551(6)    | 4856(7)  | 6014(4)    | 25.6(17) |
| C7A  | 8383(6)    | 7724(7)  | 5392(6)    | 25.3(8)  |
| C8A  | 8752(9)    | 7489(16) | 4783(8)    | 26(3)    |
| C9A  | 7994(9)    | 8898(7)  | 5309(10)   | 34(3)    |
| C10A | 8906(7)    | 7732(13) | 6054(8)    | 29(3)    |
| C11A | 5860(4)    | 3524(12) | 4193(6)    | 41.9(17) |

| Atom | x         | y         | z         | $U_{eq}$  |
|------|-----------|-----------|-----------|-----------|
| C12A | 5287(5)   | 3550(20)  | 3565(8)   | 50(3)     |
| C13A | 6004(8)   | 4743(13)  | 4490(12)  | 52(3)     |
| C14A | 5659(8)   | 2678(18)  | 4733(8)   | 47(3)     |
| C15A | 8862(8)   | 4156(11)  | 2734(4)   | 25.7(16)  |
| C16A | 8184(11)  | 3447(18)  | 2633(8)   | 28(3)     |
| C17A | 9488(12)  | 3358(18)  | 2739(8)   | 30(3)     |
| C18A | 8849(12)  | 5101(16)  | 2184(5)   | 30(3)     |
| N1A  | 8776(4)   | 4051(9)   | 4116(3)   | 24.5(7)   |
| N2A  | 8546(3)   | 3084(5)   | 5314(3)   | 24.6(6)   |
| N3A  | 7264(3)   | 3079(7)   | 4517(5)   | 29.3(9)   |
| N4A  | 8112(5)   | 5334(5)   | 5401(4)   | 23.8(8)   |
| O1A  | 7250(6)   | 6685(9)   | 4806(6)   | 27(2)     |
| O2A  | 7487(7)   | 6743(10)  | 6070(6)   | 30(2)     |
| O3A  | 6759(6)   | 3759(14)  | 3366(5)   | 39.6(10)  |
| O4A  | 6505(6)   | 1740(10)  | 3726(7)   | 40.6(11)  |
| O5A  | 8383(8)   | 5795(10)  | 3457(6)   | 29(2)     |
| O6A  | 9644(7)   | 5377(14)  | 3685(6)   | 33(2)     |
| S1A  | 7745(4)   | 6573(5)   | 5428(4)   | 24.7(12)  |
| S2A  | 6639(3)   | 2968(8)   | 3904(3)   | 31.4(3)   |
| S3A  | 8938(5)   | 4935(7)   | 3548(3)   | 24.6(12)  |
| Co1  | 7977.5(3) | 4271.8(5) | 4576.9(2) | 20.73(14) |
| C25B | 5785(7)   | 7943(9)   | 4189(5)   | 85(2)     |
| C21B | 8854(3)   | 8915(13)  | 3199(10)  | 33(3)     |
| C29B | 6240(5)   | 5503(9)   | 1777(7)   | 68(3)     |
| C33B | 6540(5)   | 11488(6)  | 1896(6)   | 46(2)     |
| C23B | 6703(4)   | 8007(8)   | 3440(3)   | 36.8(15)  |
| C27B | 6514(4)   | 7542(6)   | 2190(3)   | 34.0(13)  |
| C31B | 6574(4)   | 9615(6)   | 2582(3)   | 32.5(13)  |
| C20B | 8091(3)   | 9180(20)  | 3216(16)  | 34.5(17)  |
| N5B  | 6859(2)   | 8391(5)   | 2741(2)   | 28.2(10)  |
| C22B | 9322(5)   | 9762(17)  | 3624(12)  | 46(4)     |
| C24B | 5940(4)   | 7755(9)   | 3463(4)   | 55.0(19)  |
| C26B | 5705(7)   | 9217(9)   | 4332(5)   | 76(3)     |
| C28B | 6735(5)   | 6268(7)   | 2264(6)   | 50(2)     |
| C30B | 6602(7)   | 4584(14)  | 1442(9)   | 101(4)    |
| C32B | 6724(5)   | 10176(6)  | 1936(4)   | 44.9(17)  |
| C34B | 5781(6)   | 11681(13) | 1835(9)   | 63(3)     |
| C19B | 7642(3)   | 8329(7)   | 2743(4)   | 27.5(13)  |
| C25A | 5766(9)   | 7981(13)  | 4167(7)   | 86(2)     |
| C21A | 8800(4)   | 9090(20)  | 3108(16)  | 33(3)     |
| C29A | 6328(9)   | 5246(12)  | 1903(9)   | 62(3)     |
| C33A | 6292(5)   | 11018(8)  | 1711(5)   | 60(2)     |
| C23A | 6676(5)   | 8660(11)  | 3497(4)   | 36.7(17)  |
| C27A | 6571(5)   | 6958(7)   | 2685(4)   | 35.1(15)  |
| C31A | 6494(5)   | 9003(7)   | 2244(4)   | 33.0(16)  |
| C20A | 8038(5)   | 9220(30)  | 3190(20)  | 34.2(19)  |
| N5A  | 6842(3)   | 8217(5)   | 2812(3)   | 29.8(13)  |
| C22A | 9248(7)   | 9960(30)  | 3535(19)  | 48(5)     |
| C24A | 5904(6)   | 8683(14)  | 3543(5)   | 60(2)     |
| C26A | 5884(12)  | 8720(20)  | 4795(5)   | 94(4)     |
| C28A | 6787(7)   | 6323(10)  | 2085(9)   | 46(2)     |
| C30A | 6437(11)  | 4699(19)  | 1253(10)  | 97(5)     |
| C32A | 6717(6)   | 10269(7)  | 2267(5)   | 43.0(19)  |
| C34A | 5636(10)  | 11440(30) | 1915(13)  | 72(4)     |
| C19A | 7630(3)   | 8178(8)   | 2843(5)   | 28.3(16)  |

**Table S24:** Anisotropic Displacement Parameters ( $\times 10^4$ ) **cmw04bucobus**. The anisotropic displacement factor exponent takes the form:  $-2\pi^2[h^2a^{*2} \times U_{11} + \dots + 2hka^* \times b^* \times U_{12}]$

| Atom | $U_{11}$ | $U_{22}$ | $U_{33}$ | $U_{23}$ | $U_{13}$ | $U_{12}$ |
|------|----------|----------|----------|----------|----------|----------|
| C1B  | 32(2)    | 53(3)    | 22(2)    | 7(2)     | 2.2(18)  | 13(2)    |
| C2B  | 40(2)    | 40(3)    | 24(2)    | 2(2)     | 4.4(19)  | 15(2)    |
| C3B  | 46(2)    | 26(2)    | 24(2)    | 0.1(18)  | -1.9(19) | 0.7(19)  |
| C4B  | 54(3)    | 29(2)    | 33(3)    | -1(2)    | -10(2)   | -3(2)    |
| C5B  | 30(2)    | 26.4(17) | 13.9(14) | 1.0(12)  | -1.9(14) | 0.9(15)  |
| C6B  | 34(3)    | 27(2)    | 13.9(17) | 0.5(15)  | 2.6(18)  | 1.9(19)  |
| C7B  | 34.2(16) | 21.5(16) | 18.7(15) | -0.5(13) | -0.2(12) | 6.7(14)  |
| C8B  | 34(3)    | 24(3)    | 22(2)    | 1(2)     | 0(2)     | 5(3)     |
| C9B  | 44(4)    | 24(2)    | 33(3)    | -3(2)    | -5(3)    | 10(2)    |
| C10B | 38(3)    | 27(4)    | 21(2)    | 0(2)     | -2.7(19) | 7(3)     |
| C11B | 35(2)    | 54(3)    | 36(2)    | -8(2)    | 9.2(18)  | -8.2(19) |
| C12B | 35(3)    | 78(6)    | 53(4)    | 0(3)     | 5(3)     | -14(3)   |
| C13B | 38(3)    | 61(3)    | 68(4)    | -16(3)   | 20(3)    | -8(3)    |
| C14B | 56(5)    | 67(4)    | 39(3)    | -5(3)    | 15(3)    | -10(4)   |
| C15B | 27(2)    | 33(2)    | 13.0(16) | -1.7(15) | -0.2(15) | -0.8(18) |
| C16B | 34(2)    | 37(4)    | 22(3)    | -6(3)    | 2(2)     | -5(3)    |
| C17B | 36(3)    | 43(3)    | 19(3)    | 1(3)     | 2(2)     | 7(2)     |
| C18B | 38(3)    | 43(4)    | 16(2)    | 2(2)     | 1(2)     | 1(3)     |
| N1B  | 25.0(12) | 31.0(14) | 16.9(10) | -0.2(10) | 1.5(9)   | 3.1(11)  |
| N2B  | 32.6(13) | 24.1(12) | 15.8(11) | -0.3(10) | -0.5(10) | 4.4(10)  |
| N3B  | 32.1(13) | 28.8(14) | 25.2(14) | -0.5(11) | -0.9(11) | -4.8(11) |
| N4B  | 31(2)    | 25.1(13) | 14.3(12) | 0.1(10)  | 2.3(12)  | 5.3(13)  |
| O1B  | 30(2)    | 37(3)    | 22(2)    | 4.1(17)  | 0.4(17)  | 4.9(19)  |
| O2B  | 42(3)    | 34(2)    | 25(2)    | 0.0(18)  | 11(2)    | 12(2)    |
| O3B  | 35(2)    | 54(2)    | 29.0(13) | 6.6(13)  | 4.0(14)  | 5.4(17)  |
| O4B  | 43.9(19) | 51.8(16) | 24(3)    | -8.6(16) | -0.9(16) | -9.4(14) |
| O5B  | 36(2)    | 33(2)    | 21(2)    | -4.4(18) | -4.6(19) | 2.7(18)  |
| O6B  | 34(2)    | 49(3)    | 23(3)    | -1(2)    | -4.2(18) | -9(2)    |
| S1B  | 29.9(10) | 24.0(9)  | 18.4(11) | -1.5(7)  | 3.7(8)   | 6.8(8)   |
| S2B  | 29.9(5)  | 42.9(6)  | 20.0(6)  | -3.8(5)  | -0.3(4)  | -6.6(5)  |
| S3B  | 25.9(10) | 31.4(10) | 15.0(9)  | -1.7(7)  | -0.9(7)  | -1.1(8)  |
| C1A  | 32(3)    | 44(4)    | 21(3)    | 4(3)     | 4(2)     | 11(3)    |
| C2A  | 35(3)    | 33(4)    | 20(3)    | 1(3)     | 3(2)     | 5(2)     |
| C3A  | 45(3)    | 27(3)    | 23(4)    | -1(2)    | 0(3)     | -2(2)    |
| C4A  | 47(3)    | 31(3)    | 32(3)    | 3(3)     | -3(3)    | -4(2)    |
| C5A  | 30(2)    | 26.4(17) | 13.9(14) | 1.0(12)  | -1.9(14) | 0.9(15)  |
| C6A  | 33(4)    | 28(2)    | 15(3)    | 1(2)     | 0(3)     | 3(2)     |
| C7A  | 34.2(16) | 21.5(16) | 18.7(15) | -0.5(13) | -0.2(12) | 6.7(14)  |
| C8A  | 34(4)    | 22(5)    | 19(4)    | 2(3)     | -2(3)    | 6(4)     |
| C9A  | 41(5)    | 23(3)    | 35(5)    | -3(3)    | -4(4)    | 9(3)     |
| C10A | 40(4)    | 24(6)    | 21(3)    | -2(3)    | -2(3)    | 10(4)    |
| C11A | 35(3)    | 54(3)    | 38(3)    | -7(3)    | 8(2)     | -6(2)    |
| C12A | 33(4)    | 73(7)    | 45(5)    | -3(4)    | 7(3)     | -8(4)    |
| C13A | 38(5)    | 59(4)    | 61(5)    | -15(4)   | 15(4)    | -5(3)    |
| C14A | 41(6)    | 61(5)    | 42(5)    | -7(4)    | 13(4)    | -6(4)    |
| C15A | 28(3)    | 34(3)    | 14(2)    | -2(2)    | 0(2)     | -1(2)    |
| C16A | 32(3)    | 34(5)    | 17(5)    | -5(4)    | 3(3)     | -1(4)    |
| C17A | 34(4)    | 40(5)    | 15(5)    | 0(4)     | 3(3)     | 4(4)     |
| C18A | 35(5)    | 39(5)    | 16(3)    | 1(3)     | 3(3)     | 1(4)     |
| N1A  | 25.0(12) | 31.0(14) | 16.9(10) | -0.2(10) | 1.5(9)   | 3.1(11)  |
| N2A  | 32.6(13) | 24.1(12) | 15.8(11) | -0.3(10) | -0.5(10) | 4.4(10)  |
| N3A  | 32.1(13) | 28.8(14) | 25.2(14) | -0.5(11) | -0.9(11) | -4.8(11) |
| N4A  | 31(2)    | 25.1(13) | 14.3(12) | 0.1(10)  | 2.3(12)  | 5.3(13)  |
| O1A  | 31(4)    | 31(4)    | 17(3)    | 3(3)     | 0(3)     | 5(3)     |
| O2A  | 40(5)    | 33(4)    | 17(3)    | 0(3)     | 5(3)     | 12(3)    |
| O3A  | 35(2)    | 54(2)    | 29.0(13) | 6.6(13)  | 4.0(14)  | 5.4(17)  |
| O4A  | 43.9(19) | 51.8(16) | 24(3)    | -8.6(16) | -0.9(16) | -9.4(14) |



| Atom | $U_{11}$ | $U_{22}$ | $U_{33}$ | $U_{23}$  | $U_{13}$ | $U_{12}$ |
|------|----------|----------|----------|-----------|----------|----------|
| O5A  | 31(3)    | 30(3)    | 23(3)    | -3(2)     | -2(2)    | 0(2)     |
| O6A  | 32(3)    | 48(5)    | 17(4)    | 2(4)      | -4(3)    | -7(3)    |
| S1A  | 33(2)    | 25.8(19) | 14.0(19) | -0.7(14)  | -0.6(15) | 7.8(15)  |
| S2A  | 29.9(5)  | 42.9(6)  | 20.0(6)  | -3.8(5)   | -0.3(4)  | -6.6(5)  |
| S3A  | 26.5(19) | 32.2(19) | 13.6(17) | -3.1(14)  | -1.2(14) | -0.1(15) |
| Co1  | 24.3(3)  | 23.2(3)  | 14.0(2)  | -0.44(18) | 0.72(17) | 1.5(2)   |
| C25B | 85(5)    | 106(5)   | 69(4)    | 17(3)     | 32(3)    | 12(4)    |
| C21B | 36(2)    | 36(5)    | 25(5)    | 11(4)     | 0(2)     | -2(2)    |
| C29B | 50(4)    | 54(4)    | 90(6)    | -20(4)    | -19(4)   | 1(3)     |
| C33B | 57(5)    | 46(4)    | 35(5)    | 11(3)     | 5(3)     | 12(3)    |
| C23B | 41(3)    | 47(4)    | 23(2)    | 10(2)     | 5.8(18)  | 7(3)     |
| C27B | 26(3)    | 44(2)    | 30(2)    | -1.2(19)  | 0(2)     | 2(2)     |
| C31B | 36(3)    | 39(2)    | 23(2)    | 4.8(18)   | 6(2)     | 10(2)    |
| C20B | 38(2)    | 31(3)    | 32(3)    | 1(3)      | -1(2)    | 0(2)     |
| N5B  | 29.2(19) | 35(2)    | 19.9(19) | 4.6(16)   | 2.2(15)  | 4.6(16)  |
| C22B | 46(4)    | 43(7)    | 45(6)    | 8(6)      | -8(4)    | -9(4)    |
| C24B | 42(3)    | 78(5)    | 47(3)    | 19(3)     | 13(2)    | 4(3)     |
| C26B | 89(7)    | 87(5)    | 58(5)    | 16(4)     | 31(5)    | 9(4)     |
| C28B | 41(3)    | 46(3)    | 59(5)    | -8(3)     | -8(3)    | 1(2)     |
| C30B | 55(7)    | 116(7)   | 115(8)   | -60(7)    | -36(6)   | 17(5)    |
| C32B | 56(4)    | 48(3)    | 33(3)    | 14(2)     | 13(3)    | 14(3)    |
| C34B | 61(5)    | 68(7)    | 60(6)    | 14(5)     | 10(4)    | 18(5)    |
| C19B | 29.7(19) | 30(3)    | 22(3)    | 5(2)      | 1.8(16)  | 3.8(17)  |
| C25A | 85(5)    | 111(5)   | 70(4)    | 20(4)     | 31(4)    | 8(4)     |
| C21A | 37(3)    | 35(5)    | 24(6)    | 11(5)     | -1(3)    | -1(3)    |
| C29A | 44(4)    | 48(4)    | 84(6)    | -15(4)    | -19(4)   | 3(4)     |
| C33A | 76(5)    | 58(4)    | 45(4)    | 16(3)     | 2(3)     | 18(3)    |
| C23A | 45(3)    | 43(4)    | 22(2)    | 5(2)      | 4(2)     | 8(3)     |
| C27A | 31(3)    | 38(3)    | 33(3)    | 4(2)      | -3(3)    | 1(2)     |
| C31A | 35(3)    | 42(3)    | 22(3)    | 6(2)      | 4(2)     | 11(2)    |
| C20A | 37(3)    | 31(3)    | 32(4)    | 1(3)      | 0(3)     | 0(3)     |
| N5A  | 31(2)    | 35(2)    | 22(2)    | 5.1(19)   | -0.2(18) | 3.3(18)  |
| C22A | 47(5)    | 43(8)    | 49(8)    | 4(8)      | -5(5)    | -7(5)    |
| C24A | 49(3)    | 83(5)    | 49(4)    | 7(4)      | 15(3)    | 8(3)     |
| C26A | 98(9)    | 119(8)   | 68(5)    | 9(5)      | 26(5)    | 14(7)    |
| C28A | 40(3)    | 50(3)    | 45(5)    | -9(3)     | -2(3)    | 1(3)     |
| C30A | 50(8)    | 127(8)   | 104(7)   | -56(7)    | -21(6)   | 5(7)     |
| C32A | 58(4)    | 43(3)    | 29(4)    | 8(3)      | 9(4)     | 9(3)     |
| C34A | 74(6)    | 77(9)    | 64(7)    | 15(6)     | 7(5)     | 24(6)    |
| C19A | 32(2)    | 30(3)    | 22(3)    | 4(3)      | -1(2)    | 3.8(19)  |

**Table S25:** Bond Lengths in Å for **cmw04bucobus**.

| Atom | Atom | Length/Å | Atom | Atom | Length/Å |
|------|------|----------|------|------|----------|
| C1B  | C2B  | 1.508(7) | C11B | C13B | 1.512(8) |
| C1B  | N1B  | 1.474(6) | C11B | C14B | 1.535(9) |
| C2B  | N2B  | 1.486(6) | C11B | S2B  | 1.820(5) |
| C3B  | C4B  | 1.532(7) | C15B | C16B | 1.533(6) |
| C3B  | N2B  | 1.476(6) | C15B | C17B | 1.519(6) |
| C4B  | N3B  | 1.459(7) | C15B | C18B | 1.528(6) |
| C5B  | C6B  | 1.507(7) | C15B | S3B  | 1.824(4) |
| C5B  | N2B  | 1.484(5) | N1B  | S3B  | 1.579(4) |
| C6B  | N4B  | 1.472(6) | N1B  | Co1  | 1.952(4) |
| C7B  | C8B  | 1.526(6) | N2B  | Co1  | 2.118(4) |
| C7B  | C9B  | 1.529(7) | N3B  | S2B  | 1.583(4) |
| C7B  | C10B | 1.530(6) | N3B  | Co1  | 1.978(4) |
| C7B  | S1B  | 1.814(5) | N4B  | S1B  | 1.582(4) |
| C11B | C12B | 1.534(8) | N4B  | Co1  | 1.934(4) |

| Atom | Atom | Length/Å | Atom | Atom | Length/Å  |
|------|------|----------|------|------|-----------|
| O1B  | S1B  | 1.446(3) | O4A  | S2A  | 1.450(4)  |
| O2B  | S1B  | 1.456(3) | O5A  | S3A  | 1.448(4)  |
| O3B  | S2B  | 1.442(4) | O6A  | S3A  | 1.450(4)  |
| O4B  | S2B  | 1.450(4) | C25B | C24B | 1.533(4)  |
| O5B  | S3B  | 1.448(3) | C25B | C26B | 1.486(7)  |
| O6B  | S3B  | 1.449(4) | C21B | C20B | 1.525(4)  |
| C1A  | C2A  | 1.506(7) | C21B | C22B | 1.491(6)  |
| C1A  | N1A  | 1.473(6) | C29B | C28B | 1.523(4)  |
| C2A  | N2A  | 1.484(6) | C29B | C30B | 1.475(6)  |
| C3A  | C4A  | 1.531(7) | C33B | C32B | 1.530(4)  |
| C3A  | N2A  | 1.473(6) | C33B | C34B | 1.482(7)  |
| C4A  | N3A  | 1.459(7) | C23B | N5B  | 1.529(7)  |
| C5A  | C6A  | 1.506(7) | C23B | C24B | 1.525(9)  |
| C5A  | N2A  | 1.481(5) | C27B | N5B  | 1.530(7)  |
| C6A  | N4A  | 1.473(6) | C27B | C28B | 1.508(10) |
| C7A  | C8A  | 1.526(6) | C31B | N5B  | 1.510(7)  |
| C7A  | C9A  | 1.529(7) | C31B | C32B | 1.501(8)  |
| C7A  | C10A | 1.530(6) | C20B | C19B | 1.522(7)  |
| C7A  | S1A  | 1.814(5) | N5B  | C19B | 1.529(6)  |
| C11A | C12A | 1.534(8) | C25A | C24A | 1.531(3)  |
| C11A | C13A | 1.513(8) | C25A | C26A | 1.486(6)  |
| C11A | C14A | 1.535(9) | C21A | C20A | 1.525(3)  |
| C11A | S2A  | 1.820(6) | C21A | C22A | 1.490(6)  |
| C15A | C16A | 1.533(6) | C29A | C28A | 1.524(3)  |
| C15A | C17A | 1.519(6) | C29A | C30A | 1.477(6)  |
| C15A | C18A | 1.528(6) | C33A | C32A | 1.528(3)  |
| C15A | S3A  | 1.824(4) | C33A | C34A | 1.482(6)  |
| N1A  | S3A  | 1.579(4) | C23A | N5A  | 1.530(7)  |
| N1A  | Co1  | 1.944(7) | C23A | C24A | 1.525(9)  |
| N2A  | Co1  | 2.160(5) | C27A | N5A  | 1.530(7)  |
| N3A  | S2A  | 1.584(4) | C27A | C28A | 1.508(10) |
| N3A  | Co1  | 1.932(7) | C31A | N5A  | 1.511(7)  |
| N4A  | S1A  | 1.583(4) | C31A | C32A | 1.500(8)  |
| N4A  | Co1  | 2.013(6) | C20A | C19A | 1.522(7)  |
| O1A  | S1A  | 1.445(4) | N5A  | C19A | 1.529(6)  |
| O2A  | S1A  | 1.456(4) |      |      |           |
| O3A  | S2A  | 1.442(4) |      |      |           |

**Table S26:** Bond Angles in ° for **cmw04bucobus**.

| Atom | Atom | Atom | Angle/°  | Atom | Atom | Atom | Angle/°  |
|------|------|------|----------|------|------|------|----------|
| N1B  | C1B  | C2B  | 108.2(4) | C13B | C11B | S2B  | 109.1(4) |
| N2B  | C2B  | C1B  | 110.4(4) | C14B | C11B | S2B  | 108.8(5) |
| N2B  | C3B  | C4B  | 110.8(4) | C16B | C15B | S3B  | 108.5(3) |
| N3B  | C4B  | C3B  | 107.6(4) | C17B | C15B | C16B | 111.2(4) |
| N2B  | C5B  | C6B  | 109.4(3) | C17B | C15B | C18B | 110.2(4) |
| N4B  | C6B  | C5B  | 107.9(4) | C17B | C15B | S3B  | 109.3(3) |
| C8B  | C7B  | C9B  | 110.9(4) | C18B | C15B | C16B | 111.1(4) |
| C8B  | C7B  | C10B | 110.3(4) | C18B | C15B | S3B  | 106.5(4) |
| C8B  | C7B  | S1B  | 108.6(3) | C1B  | N1B  | S3B  | 121.2(3) |
| C9B  | C7B  | C10B | 109.7(4) | C1B  | N1B  | Co1  | 112.6(3) |
| C9B  | C7B  | S1B  | 107.5(3) | S3B  | N1B  | Co1  | 123.7(2) |
| C10B | C7B  | S1B  | 109.8(4) | C2B  | N2B  | Co1  | 106.5(3) |
| C12B | C11B | C14B | 110.3(6) | C3B  | N2B  | C2B  | 113.9(4) |
| C12B | C11B | S2B  | 106.7(4) | C3B  | N2B  | C5B  | 111.6(4) |
| C13B | C11B | C12B | 111.3(6) | C3B  | N2B  | Co1  | 106.2(3) |
| C13B | C11B | C14B | 110.6(5) | C5B  | N2B  | C2B  | 111.6(4) |

| Atom | Atom | Atom | Angle/°  | Atom | Atom | Atom | Angle/°    |
|------|------|------|----------|------|------|------|------------|
| C5B  | N2B  | Co1  | 106.4(3) | C4A  | N3A  | S2A  | 118.9(4)   |
| C4B  | N3B  | S2B  | 119.0(4) | C4A  | N3A  | Co1  | 115.7(4)   |
| C4B  | N3B  | Co1  | 113.4(3) | S2A  | N3A  | Co1  | 124.2(4)   |
| S2B  | N3B  | Co1  | 126.3(3) | C6A  | N4A  | S1A  | 120.3(4)   |
| C6B  | N4B  | S1B  | 120.8(3) | C6A  | N4A  | Co1  | 115.7(3)   |
| C6B  | N4B  | Co1  | 113.1(3) | S1A  | N4A  | Co1  | 123.9(4)   |
| S1B  | N4B  | Co1  | 125.6(2) | N4A  | S1A  | C7A  | 108.7(3)   |
| N4B  | S1B  | C7B  | 108.8(2) | O1A  | S1A  | C7A  | 105.8(3)   |
| O1B  | S1B  | C7B  | 105.7(2) | O1A  | S1A  | N4A  | 107.1(3)   |
| O1B  | S1B  | N4B  | 107.1(2) | O1A  | S1A  | O2A  | 117.3(3)   |
| O1B  | S1B  | O2B  | 117.3(3) | O2A  | S1A  | C7A  | 105.9(3)   |
| O2B  | S1B  | C7B  | 105.9(2) | O2A  | S1A  | N4A  | 111.7(3)   |
| O2B  | S1B  | N4B  | 111.7(2) | N3A  | S2A  | C11A | 108.0(3)   |
| N3B  | S2B  | C11B | 107.9(2) | O3A  | S2A  | C11A | 105.1(3)   |
| O3B  | S2B  | C11B | 105.1(3) | O3A  | S2A  | N3A  | 108.9(3)   |
| O3B  | S2B  | N3B  | 108.9(2) | O3A  | S2A  | O4A  | 117.5(3)   |
| O3B  | S2B  | O4B  | 117.5(2) | O4A  | S2A  | C11A | 106.4(3)   |
| O4B  | S2B  | C11B | 106.4(2) | O4A  | S2A  | N3A  | 110.4(3)   |
| O4B  | S2B  | N3B  | 110.5(2) | N1A  | S3A  | C15A | 109.1(3)   |
| N1B  | S3B  | C15B | 108.9(2) | O5A  | S3A  | C15A | 105.2(3)   |
| O5B  | S3B  | C15B | 105.3(2) | O5A  | S3A  | N1A  | 106.6(3)   |
| O5B  | S3B  | N1B  | 106.6(2) | O5A  | S3A  | O6A  | 117.3(3)   |
| O5B  | S3B  | O6B  | 117.3(3) | O6A  | S3A  | C15A | 106.0(3)   |
| O6B  | S3B  | C15B | 106.0(2) | O6A  | S3A  | N1A  | 112.2(3)   |
| O6B  | S3B  | N1B  | 112.3(2) | N1B  | Co1  | N2B  | 84.08(16)  |
| N1A  | C1A  | C2A  | 108.9(5) | N1B  | Co1  | N3B  | 117.5(2)   |
| N2A  | C2A  | C1A  | 111.0(4) | N3B  | Co1  | N2B  | 83.77(16)  |
| N2A  | C3A  | C4A  | 111.1(5) | N4B  | Co1  | N1B  | 119.76(19) |
| N3A  | C4A  | C3A  | 108.1(5) | N4B  | Co1  | N2B  | 83.79(15)  |
| N2A  | C5A  | C6A  | 109.7(4) | N4B  | Co1  | N3B  | 119.4(2)   |
| N4A  | C6A  | C5A  | 108.1(4) | N1A  | Co1  | N2A  | 82.8(2)    |
| C8A  | C7A  | C9A  | 110.9(5) | N1A  | Co1  | N4A  | 116.6(3)   |
| C8A  | C7A  | C10A | 110.3(4) | N3A  | Co1  | N1A  | 120.3(4)   |
| C8A  | C7A  | S1A  | 108.6(3) | N3A  | Co1  | N2A  | 83.8(2)    |
| C9A  | C7A  | C10A | 109.8(5) | N3A  | Co1  | N4A  | 117.9(4)   |
| C9A  | C7A  | S1A  | 107.4(4) | N4A  | Co1  | N2A  | 80.7(2)    |
| C10A | C7A  | S1A  | 109.8(4) | C26B | C25B | C24B | 110.9(5)   |
| C12A | C11A | C14A | 110.2(6) | C22B | C21B | C20B | 111.8(4)   |
| C12A | C11A | S2A  | 106.8(5) | C30B | C29B | C28B | 112.9(5)   |
| C13A | C11A | C12A | 111.2(6) | C34B | C33B | C32B | 111.8(5)   |
| C13A | C11A | C14A | 110.6(5) | C24B | C23B | N5B  | 114.6(5)   |
| C13A | C11A | S2A  | 109.1(4) | C28B | C27B | N5B  | 116.6(5)   |
| C14A | C11A | S2A  | 108.8(5) | C32B | C31B | N5B  | 116.9(4)   |
| C16A | C15A | S3A  | 108.5(3) | C19B | C20B | C21B | 109.2(4)   |
| C17A | C15A | C16A | 111.3(5) | C23B | N5B  | C27B | 109.9(5)   |
| C17A | C15A | C18A | 110.1(5) | C31B | N5B  | C23B | 109.3(5)   |
| C17A | C15A | S3A  | 109.3(3) | C31B | N5B  | C27B | 109.0(3)   |
| C18A | C15A | C16A | 111.1(4) | C31B | N5B  | C19B | 112.2(4)   |
| C18A | C15A | S3A  | 106.4(4) | C19B | N5B  | C23B | 109.1(4)   |
| C1A  | N1A  | S3A  | 121.1(4) | C19B | N5B  | C27B | 107.3(4)   |
| C1A  | N1A  | Co1  | 116.1(4) | C23B | C24B | C25B | 110.0(6)   |
| S3A  | N1A  | Co1  | 121.4(4) | C27B | C28B | C29B | 110.0(7)   |
| C2A  | N2A  | Co1  | 105.4(4) | C31B | C32B | C33B | 112.4(6)   |
| C3A  | N2A  | C2A  | 114.7(5) | C20B | C19B | N5B  | 116.6(4)   |
| C3A  | N2A  | C5A  | 112.5(4) | C26A | C25A | C24A | 111.1(5)   |
| C3A  | N2A  | Co1  | 103.9(4) | C22A | C21A | C20A | 111.8(4)   |
| C5A  | N2A  | C2A  | 112.3(4) | C30A | C29A | C28A | 112.5(5)   |
| C5A  | N2A  | Co1  | 107.1(4) | C34A | C33A | C32A | 111.9(5)   |

| Atom | Atom | Atom | Angle/°  | Atom | Atom | Atom | Angle/°  |
|------|------|------|----------|------|------|------|----------|
| C24A | C23A | N5A  | 114.3(5) | C31A | N5A  | C19A | 112.2(5) |
| C28A | C27A | N5A  | 116.3(5) | C19A | N5A  | C23A | 109.1(4) |
| C32A | C31A | N5A  | 116.7(4) | C19A | N5A  | C27A | 107.4(4) |
| C19A | C20A | C21A | 109.2(4) | C23A | C24A | C25A | 110.1(6) |
| C23A | N5A  | C27A | 109.6(5) | C27A | C28A | C29A | 110.0(7) |
| C31A | N5A  | C23A | 109.5(5) | C31A | C32A | C33A | 112.9(6) |
| C31A | N5A  | C27A | 109.0(4) | C20A | C19A | N5A  | 116.5(4) |

**Table S27:** Hydrogen Fractional Atomic Coordinates ( $\times 10^4$ ) and Equivalent Isotropic Displacement Parameters ( $\text{\AA}^2 \times 10^3$ ) for **cmw04bucobus**.  $U_{eq}$  is defined as 1/3 of the trace of the orthogonalised  $U_{ij}$ .

| Atom | x    | y    | z    | $U_{eq}$ |
|------|------|------|------|----------|
| H1BA | 9639 | 4290 | 4914 | 43       |
| H1BB | 9750 | 3385 | 4318 | 43       |
| H2BA | 9020 | 2012 | 4682 | 42       |
| H2BB | 9517 | 2439 | 5361 | 42       |
| H3BA | 7747 | 2344 | 5710 | 39       |
| H3BB | 8303 | 1398 | 5536 | 39       |
| H4BA | 7846 | 1433 | 4375 | 48       |
| H4BB | 7186 | 1322 | 4763 | 48       |
| H5BA | 9167 | 4176 | 5915 | 29       |
| H5BB | 8809 | 3188 | 6321 | 29       |
| H6BA | 7753 | 4162 | 6136 | 30       |
| H6BB | 8324 | 5149 | 6399 | 30       |
| H8BA | 8500 | 7337 | 4423 | 41       |
| H8BB | 9039 | 6530 | 4912 | 41       |
| H8BC | 9184 | 7911 | 4851 | 41       |
| H9BA | 8529 | 9370 | 5451 | 52       |
| H9BB | 7878 | 8934 | 5785 | 52       |
| H9BC | 7838 | 8926 | 4973 | 52       |
| H10A | 9089 | 6556 | 6147 | 44       |
| H10B | 8635 | 7472 | 6503 | 44       |
| H10C | 9286 | 7926 | 6175 | 44       |
| H12A | 4831 | 3393 | 4007 | 83       |
| H12B | 5196 | 2392 | 3620 | 83       |
| H12C | 5237 | 3742 | 3396 | 83       |
| H13A | 5988 | 5145 | 4141 | 81       |
| H13B | 6441 | 4707 | 4840 | 81       |
| H13C | 5617 | 4842 | 4783 | 81       |
| H14A | 5517 | 2726 | 5145 | 80       |
| H14B | 6344 | 2610 | 5220 | 80       |
| H14C | 5854 | 1712 | 4742 | 80       |
| H16A | 8129 | 2793 | 2294 | 47       |
| H16B | 7793 | 3787 | 2711 | 47       |
| H16C | 8225 | 2731 | 3110 | 47       |
| H17A | 9511 | 2719 | 3254 | 50       |
| H17B | 9915 | 3696 | 2887 | 50       |
| H17C | 9475 | 2696 | 2442 | 50       |
| H18A | 8828 | 4301 | 1729 | 49       |
| H18B | 9255 | 5287 | 2198 | 49       |
| H18C | 8424 | 5285 | 2090 | 49       |
| H1AA | 9767 | 3443 | 4355 | 39       |
| H1AB | 9201 | 2409 | 4217 | 39       |
| H2AA | 9522 | 2407 | 5375 | 36       |
| H2AB | 9511 | 3817 | 5416 | 36       |
| H3AA | 8308 | 1415 | 5563 | 39       |
| H3AB | 8366 | 1568 | 4771 | 39       |

| Atom | x    | y     | z    | $U_{eq}$ |
|------|------|-------|------|----------|
| H4AA | 7188 | 1370  | 4789 | 45       |
| H4AB | 7213 | 2269  | 5418 | 45       |
| H5AA | 8840 | 3180  | 6347 | 29       |
| H5AB | 8018 | 3312  | 6113 | 29       |
| H6AA | 8401 | 5179  | 6431 | 31       |
| H6AB | 9042 | 5078  | 6016 | 31       |
| H8AA | 8428 | 7619  | 4358 | 39       |
| H8AB | 8918 | 6673  | 4799 | 39       |
| H8AC | 9148 | 8026  | 4800 | 39       |
| H9AA | 8324 | 9538  | 5274 | 51       |
| H9AB | 7763 | 9033  | 5707 | 51       |
| H9AC | 7645 | 8876  | 4895 | 51       |
| H10D | 9155 | 6979  | 6105 | 44       |
| H10E | 8660 | 7848  | 6443 | 44       |
| H10F | 9239 | 8375  | 6040 | 44       |
| H12D | 4849 | 3798  | 3705 | 75       |
| H12E | 5233 | 2767  | 3360 | 75       |
| H12F | 5414 | 4115  | 3231 | 75       |
| H13D | 6189 | 5243  | 4158 | 78       |
| H13E | 6344 | 4690  | 4910 | 78       |
| H13F | 5572 | 5086  | 4594 | 78       |
| H14D | 5251 | 2986  | 4906 | 71       |
| H14E | 6047 | 2606  | 5111 | 71       |
| H14F | 5550 | 1902  | 4527 | 71       |
| H16D | 8100 | 3121  | 2169 | 42       |
| H16E | 7798 | 3963  | 2699 | 42       |
| H16F | 8222 | 2802  | 2965 | 42       |
| H17D | 9499 | 2771  | 3104 | 45       |
| H17E | 9913 | 3831  | 2820 | 45       |
| H17F | 9455 | 2957  | 2298 | 45       |
| H18D | 8829 | 4723  | 1737 | 45       |
| H18E | 9271 | 5583  | 2281 | 45       |
| H18F | 8440 | 5604  | 2180 | 45       |
| H25A | 5353 | 7521  | 4243 | 102      |
| H25B | 6168 | 7612  | 4522 | 102      |
| H21A | 8961 | 8104  | 3368 | 39       |
| H21B | 8942 | 8954  | 2721 | 39       |
| H29A | 5905 | 5122  | 2034 | 81       |
| H29B | 5974 | 6011  | 1422 | 81       |
| H33A | 6778 | 11889 | 2312 | 56       |
| H33B | 6709 | 11841 | 1497 | 56       |
| H23A | 6976 | 7289  | 3583 | 44       |
| H23B | 6863 | 8634  | 3776 | 44       |
| H27A | 6005 | 7578  | 2181 | 41       |
| H27B | 6607 | 7828  | 1742 | 41       |
| H31A | 6064 | 9584  | 2561 | 39       |
| H31B | 6761 | 10136 | 2969 | 39       |
| H20A | 7992 | 9094  | 3687 | 41       |
| H20B | 7984 | 10001 | 3066 | 41       |
| H22A | 9228 | 10563 | 3448 | 69       |
| H22B | 9807 | 9558  | 3606 | 69       |
| H22C | 9238 | 9723  | 4098 | 69       |
| H24A | 5829 | 6933  | 3318 | 66       |
| H24B | 5645 | 8287  | 3143 | 66       |
| H26A | 5533 | 9632  | 3905 | 113      |
| H26B | 6155 | 9545  | 4536 | 113      |
| H26C | 5373 | 9315  | 4650 | 113      |
| H28A | 6734 | 6006  | 2740 | 60       |

| Atom | x    | y     | z    | $U_{eq}$ |
|------|------|-------|------|----------|
| H28B | 7213 | 6184  | 2161 | 60       |
| H30A | 6918 | 4956  | 1168 | 151      |
| H30B | 6260 | 4106  | 1145 | 151      |
| H30C | 6868 | 4079  | 1791 | 151      |
| H32A | 6455 | 9765  | 1540 | 54       |
| H32B | 7223 | 10081 | 1909 | 54       |
| H34A | 5536 | 11123 | 1504 | 95       |
| H34B | 5670 | 12489 | 1680 | 95       |
| H34C | 5636 | 11560 | 2281 | 95       |
| H19A | 7799 | 7517  | 2869 | 33       |
| H19B | 7729 | 8470  | 2271 | 33       |
| H25C | 5280 | 7695  | 4089 | 104      |
| H25D | 6076 | 7286  | 4230 | 104      |
| H21C | 8959 | 8282  | 3243 | 39       |
| H21D | 8847 | 9202  | 2623 | 39       |
| H29C | 6428 | 4658  | 2274 | 74       |
| H29D | 5835 | 5482  | 1869 | 74       |
| H33C | 6572 | 11706 | 1611 | 72       |
| H33D | 6184 | 10546 | 1287 | 72       |
| H23C | 6916 | 8148  | 3865 | 44       |
| H23D | 6866 | 9466  | 3577 | 44       |
| H27C | 6728 | 6488  | 3101 | 42       |
| H27D | 6057 | 6983  | 2618 | 42       |
| H31C | 6576 | 8664  | 1804 | 40       |
| H31D | 5987 | 8980  | 2247 | 40       |
| H20C | 7995 | 9242  | 3677 | 41       |
| H20D | 7850 | 9964  | 2973 | 41       |
| H22D | 9127 | 10758 | 3368 | 71       |
| H22E | 9736 | 9802  | 3506 | 71       |
| H22F | 9175 | 9892  | 4011 | 71       |
| H24C | 5636 | 8339  | 3124 | 72       |
| H24D | 5750 | 9509  | 3581 | 72       |
| H26D | 6317 | 9162  | 4810 | 141      |
| H26E | 5918 | 8207  | 5198 | 141      |
| H26F | 5495 | 9266  | 4790 | 141      |
| H28C | 7279 | 6074  | 2200 | 55       |
| H28D | 6747 | 6861  | 1687 | 55       |
| H30D | 6477 | 5316  | 916  | 146      |
| H30E | 6042 | 4187  | 1084 | 146      |
| H30F | 6865 | 4230  | 1328 | 146      |
| H32C | 7213 | 10310 | 2215 | 52       |
| H32D | 6673 | 10603 | 2719 | 52       |
| H34D | 5257 | 11359 | 1529 | 109      |
| H34E | 5686 | 12267 | 2053 | 109      |
| H34F | 5532 | 10964 | 2300 | 109      |
| H19C | 7806 | 7451  | 3088 | 34       |
| H19D | 7730 | 8115  | 2371 | 34       |

Submitted by: **Christian Wallen**  
Emory University

Solved by: **John Bacsá**

Sample ID: **MgCoBus**

## Crystal Data and Experimental

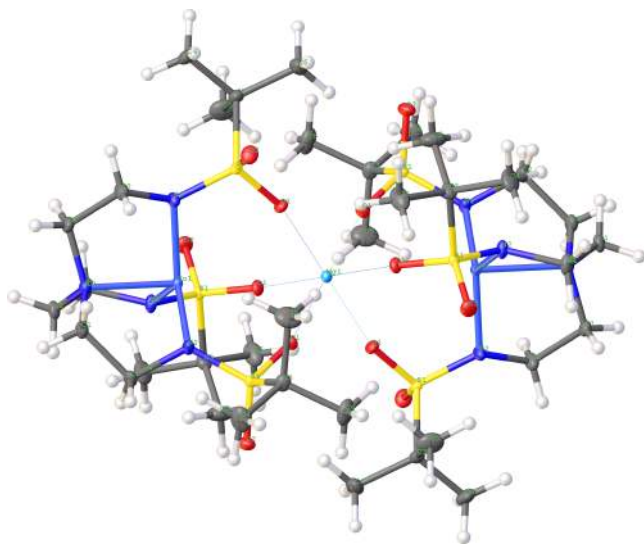

**Experimental.** Single violet prism-shaped crystals of (**MgCoBus**) were recrystallised from a mixture of  $\text{CH}_2\text{Cl}_2$  and methanol by vapor diffusion. A suitable crystal ( $0.32 \times 0.24 \times 0.21$ ) was selected and mounted on a MITIGEN holder with paratone oil on a Bruker APEX-II CCD diffractometer. The crystal was cooled to  $T = 100(2)$  K during data collection. The structure was solved with the **ShelXT** (Sheldrick, 2015) structure solution program using combined Patterson and dual-space recycling methods and by using **Olex2** (Dolomanov et al., 2009) as the graphical interface. The crystal structure was refined with version 2014/7 of **ShelXL** (Sheldrick, 2008) using Least Squares minimisation.

**Crystal Data.**  $\text{C}_{36}\text{H}_{78}\text{Co}_2\text{MgN}_8\text{O}_{12}\text{S}_6$ ,  $M_r = 1149.59$ , trigonal, R-3 (No. 148),  $a = 12.684(2)$  Å,  $b = 12.684(2)$  Å,  $c = 27.867(6)$  Å,  $\alpha = 90^\circ$ ,  $\beta = 90^\circ$ ,  $\gamma = 120^\circ$ ,  $V = 3882.7(16)$  Å<sup>3</sup>,  $T = 100(2)$  K,  $Z = 3$ ,  $Z' = 1/6$ ,  $\mu(\text{MoK}\alpha) = 0.957$ , 39376 reflections measured, 7192 unique ( $R_{\text{int}} = 0.0362$ ) which were used in all calculations. The final  $wR_2$  was 0.0856 (all data) and  $R_1$  was 0.0325 ( $I > 2\sigma(I)$ ).

| Compound                              | MgCoBus                                                                    |
|---------------------------------------|----------------------------------------------------------------------------|
| Formula                               | $\text{C}_{36}\text{H}_{78}\text{Co}_2\text{MgN}_8\text{O}_{12}\text{S}_6$ |
| $D_{\text{calc.}} / \text{g cm}^{-3}$ | 1.475                                                                      |
| $\mu / \text{mm}^{-1}$                | 0.957                                                                      |
| Formula Weight                        | 1149.59                                                                    |
| Colour                                | violet                                                                     |
| Shape                                 | prism                                                                      |
| Max Size/mm                           | 0.32                                                                       |
| Mid Size/mm                           | 0.24                                                                       |
| Min Size/mm                           | 0.21                                                                       |
| $T / \text{K}$                        | 100(2)                                                                     |
| Crystal System                        | trigonal                                                                   |
| Space Group                           | R-3                                                                        |
| $a / \text{Å}$                        | 12.684(2)                                                                  |
| $b / \text{Å}$                        | 12.684(2)                                                                  |
| $c / \text{Å}$                        | 27.867(6)                                                                  |
| $\alpha / ^\circ$                     | 90                                                                         |
| $\beta / ^\circ$                      | 90                                                                         |
| $\gamma / ^\circ$                     | 120                                                                        |
| $V / \text{Å}^3$                      | 3882.7(16)                                                                 |
| $Z$                                   | 3                                                                          |
| $Z'$                                  | 1/6                                                                        |
| $\Theta_{\text{min}} / ^\circ$        | 2.361                                                                      |
| $\Theta_{\text{max}} / ^\circ$        | 45.276                                                                     |
| Measured Refl.                        | 39376                                                                      |
| Independent Refl.                     | 7192                                                                       |
| Reflections Used                      | 6105                                                                       |
| $R_{\text{int}}$                      | 0.0362                                                                     |
| Parameters                            | 115                                                                        |
| Restraints                            | 6                                                                          |
| Largest Peak                          | 1.467                                                                      |
| Deepest Hole                          | -0.810                                                                     |
| GooF                                  | 1.060                                                                      |
| $wR_2$ (all data)                     | 0.0856                                                                     |
| $wR_2$                                | 0.0797                                                                     |
| $R_1$ (all data)                      | 0.0418                                                                     |
| $R_1$                                 | 0.0325                                                                     |
| CCDC #                                | 1434438                                                                    |

## Structure Quality Indicators

|                     |       |       |            |      |                  |       |          |       |
|---------------------|-------|-------|------------|------|------------------|-------|----------|-------|
| <b>Reflections:</b> | d min | 0.50  | $I/\sigma$ | 24.5 | R <sub>int</sub> | 3.62% | complete | 99%   |
| <b>Refinement:</b>  | Shift | 0.003 | Max Peak   | 1.5  | Min Peak         | -0.8  | Goof     | 1.060 |

A violet prism-shaped crystal with dimensions 0.32×0.24×0.21 mm was mounted on a MITIGEN holder with paratone oil. X-ray diffraction data were collected using a Bruker APEX-II CCD diffractometer equipped with an Oxford Cryosystems low-temperature apparatus operating at  $T = 100(2)$  K.

Data were measured using  $\phi$  and  $\omega$  scans and MoK $\alpha$  radiation (fine-focus sealed tube, 45 kV, 35 mA). The total number of runs and images was based on the strategy calculation from the program **APEX2** (Bruker, 2014). The maximum resolution achieved was  $\Theta = 45.27^\circ$ .

Unit cell indexing was performed by using the **APEX2** (Bruker, 2014) software and refined using **SAINT** (Bruker, V8.34A, 2013) on 9896 reflections, 25% of the observed reflections. Data reduction, scaling and absorption corrections were performed using **SAINT** (Bruker, V8.34A, 2013) and **SADABS-2014/5** (Bruker, 2014/5) was used for absorption correction.  $wR_2(\text{int})$  was 0.0848 before and 0.0460 after correction. The Ratio of minimum to maximum transmission is 0.8857. The  $\lambda/2$  correction factor is 0.00150. This software which corrects for Lorentz polarisation. The final completeness is 99.4% out to  $45.276^\circ$  in  $\Theta$ . The absorption coefficient ( $\mu$ ) of this material is  $0.957 \text{ mm}^{-1}$  and the minimum and maximum transmissions are 0.6633 and 0.7489.

The structure was solved in the space group P1 with the **ShelXT** (Sheldrick, 2015) structure solution program using combined Patterson and dual-space recycling methods. The space group R-3 (# 148) was determined by the **ShelXT** (Sheldrick, 2015) structure solution program. The crystal structure was refined by Least Squares using version 2014/7 of **ShelXL** (Sheldrick, 2008). All non-hydrogen atoms were refined anisotropically. Hydrogen atom positions were calculated geometrically and refined using the riding model.

The value of  $Z'$  is 0.16667.

## Data Plots: Diffraction Data

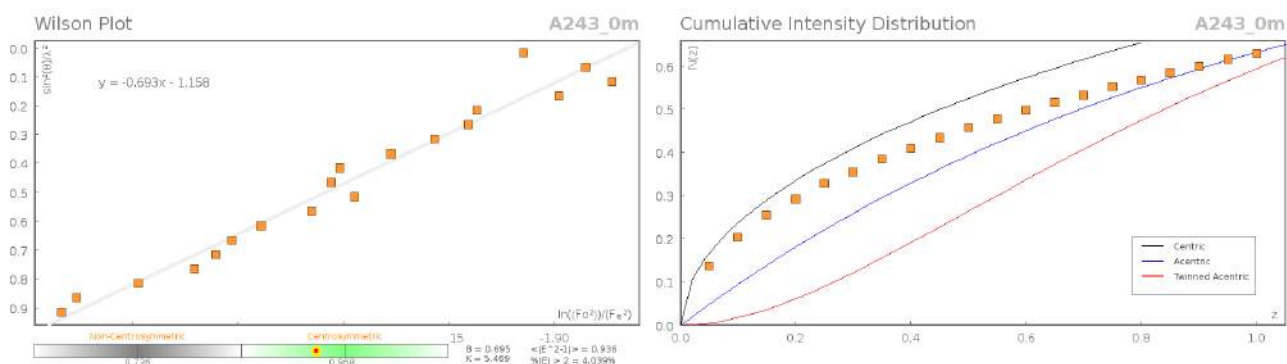



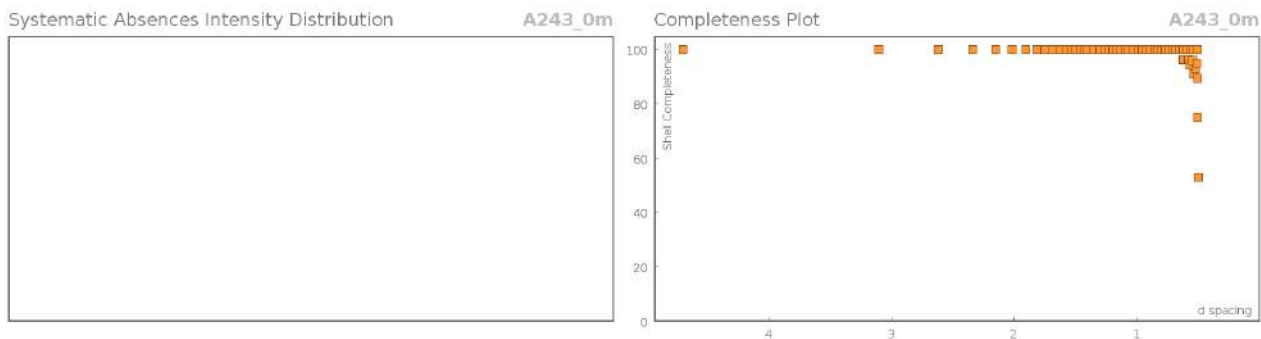

## Data Plots: Refinement and Data

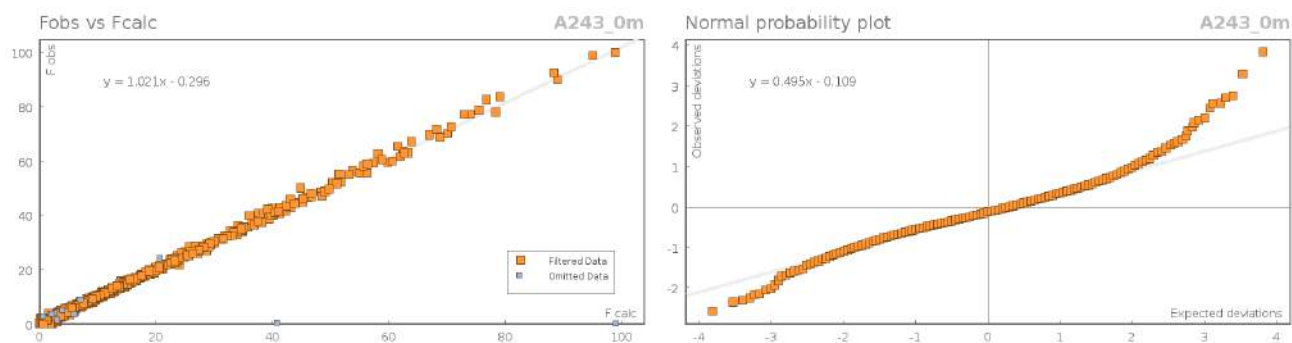

## Reflection Statistics

|                                         |                                |                                         |                 |
|-----------------------------------------|--------------------------------|-----------------------------------------|-----------------|
| Total reflections (after filtering)     | 39443                          | Unique reflections                      | 7192            |
| Completeness                            | 0.994                          | Mean $I/\sigma$                         | 24.51           |
| hkl <sub>sub</sub> >max</sub> collected | (25, 25, 48)                   | hkl <sub>sub</sub> >min</sub> collected | (-24, -24, -54) |
| hkl <sub>max</sub> used                 | (12, 25, 54)                   | hkl <sub>min</sub> used                 | (-25, 0, 0)     |
| Lim d <sub>max</sub> collected          | 100.0                          | Lim d <sub>min</sub> collected          | 0.36            |
| d <sub>max</sub> used                   | 10.22                          | d <sub>min</sub> used                   | 0.5             |
| Friedel pairs                           | 5706                           | Friedel pairs merged                    | 1               |
| Inconsistent equivalents                | 0                              | R <sub>int</sub>                        | 0.0362          |
| R <sub>sigma</sub>                      | 0.0271                         | Intensity transformed                   | 0               |
| Omitted reflections                     | 0                              | Omitted by user (OMIT hkl)              | 67              |
| Multiplicity                            | (11601, 7142, 2536, 1280, 166) | Maximum multiplicity                    | 15              |
| Removed systematic absences             | 0                              | Filtered off (Shel/OMIT)                | 0               |

## Images of the Crystal on the Diffractometer

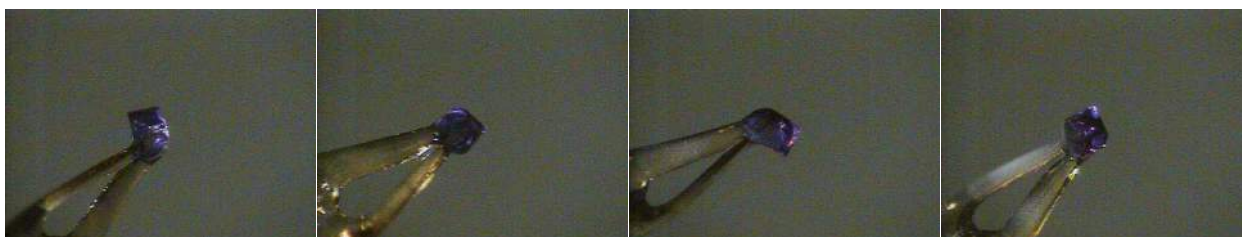

**Table S28:** Fractional Atomic Coordinates ( $\times 10^4$ ) and Equivalent Isotropic Displacement Parameters ( $\text{\AA}^2 \times 10^3$ ) for **A243\_0m**.  $U_{eq}$  is defined as  $1/3$  of the trace of the orthogonalised  $U_{ij}$ .

| Atom | x          | y           | z         | $U_{eq}$  |
|------|------------|-------------|-----------|-----------|
| Co1  | 10000      | 10000       | 3776.3(2) | 7.76(3)   |
| S1   | 7905.3(2)  | 10125.5(2)  | 4196.7(2) | 8.52(3)   |
| Mg1  | 10000      | 10000       | 5000      | 7.35(8)   |
| O1   | 8670.3(4)  | 10104.4(5)  | 4588.3(2) | 10.92(7)  |
| O2   | 6675.2(5)  | 9104.6(5)   | 4182.2(2) | 15.15(8)  |
| N1   | 10000      | 10000       | 3020.3(3) | 10.42(12) |
| N2   | 8656.8(5)  | 10319.6(6)  | 3723.6(2) | 11.79(8)  |
| C1   | 9115.9(6)  | 10383.2(7)  | 2878.7(2) | 13.71(10) |
| C2   | 8086.2(6)  | 9942.6(8)   | 3246.8(2) | 15.81(11) |
| C3   | 7791.7(6)  | 11483.1(6)  | 4298.8(3) | 13.65(10) |
| C6   | 7130.4(10) | 11343.4(10) | 4773.6(3) | 24.75(16) |
| C4   | 7069.4(10) | 11600.5(9)  | 3883.3(3) | 24.26(16) |
| C5   | 9081.2(9)  | 12566.6(8)  | 4322.4(4) | 27.57(18) |

**Table S29:** Anisotropic Displacement Parameters ( $\times 10^4$ ) **A243\_0m**. The anisotropic displacement factor exponent takes the form:  $-2\pi^2[h^2a^{*2} \times U_{11} + \dots + 2hka^* \times b^* \times U_{12}]$

| Atom | $U_{11}$  | $U_{22}$  | $U_{33}$ | $U_{23}$  | $U_{13}$  | $U_{12}$ |
|------|-----------|-----------|----------|-----------|-----------|----------|
| Co1  | 8.37(4)   | 8.37(4)   | 6.55(5)  | 0         | 0         | 4.19(2)  |
| S1   | 7.79(5)   | 10.11(5)  | 8.11(6)  | 0.16(4)   | -0.82(4)  | 4.82(4)  |
| Mg1  | 7.60(11)  | 7.60(11)  | 6.83(19) | 0         | 0         | 3.80(6)  |
| O1   | 11.43(16) | 13.89(17) | 9.47(17) | -0.03(13) | -2.53(12) | 7.84(14) |
| O2   | 9.28(16)  | 15.26(19) | 16.0(2)  | 0.50(15)  | -1.88(14) | 2.44(14) |
| N1   | 11.63(19) | 11.63(19) | 8.0(3)   | 0         | 0         | 5.82(9)  |
| N2   | 11.34(18) | 18.6(2)   | 7.75(18) | -1.17(15) | -0.86(14) | 9.24(17) |
| C1   | 16.8(2)   | 18.9(3)   | 8.2(2)   | 1.01(18)  | -1.02(17) | 10.9(2)  |
| C2   | 13.3(2)   | 25.9(3)   | 9.3(2)   | -2.2(2)   | -2.58(17) | 10.6(2)  |
| C3   | 17.3(2)   | 15.2(2)   | 13.1(2)  | 1.14(18)  | 0.23(18)  | 11.7(2)  |
| C6   | 37.5(4)   | 33.5(4)   | 17.1(3)  | 1.6(3)    | 6.7(3)    | 28.1(4)  |
| C4   | 35.1(4)   | 31.8(4)   | 19.5(3)  | 1.3(3)    | -4.9(3)   | 27.0(4)  |
| C5   | 25.2(4)   | 12.0(3)   | 42.9(5)  | -1.0(3)   | -2.6(3)   | 7.4(3)   |

**Table S30:** Bond Lengths in Å for **A243\_0m**.

| Atom | Atom            | Length/Å   |
|------|-----------------|------------|
| Co1  | N1              | 2.1069(10) |
| Co1  | N2 <sup>1</sup> | 1.9440(6)  |
| Co1  | N2              | 1.9440(7)  |
| Co1  | N2 <sup>2</sup> | 1.9440(7)  |
| S1   | O1              | 1.4694(5)  |
| S1   | O2              | 1.4465(6)  |
| S1   | N2              | 1.5725(6)  |
| S1   | C3              | 1.8208(7)  |
| Mg1  | O1 <sup>3</sup> | 2.0981(5)  |
| Mg1  | O1              | 2.0981(5)  |
| Mg1  | O1 <sup>4</sup> | 2.0981(5)  |
| Mg1  | O1 <sup>5</sup> | 2.0981(5)  |
| Mg1  | O1 <sup>1</sup> | 2.0981(5)  |

| Atom | Atom            | Length/Å   |
|------|-----------------|------------|
| Mg1  | O1 <sup>2</sup> | 2.0981(5)  |
| N1   | C1 <sup>1</sup> | 1.4814(8)  |
| N1   | C1 <sup>2</sup> | 1.4814(8)  |
| N1   | C1              | 1.4814(7)  |
| N2   | C2              | 1.4735(9)  |
| C1   | C2              | 1.5300(10) |
| C3   | C6              | 1.5290(11) |
| C3   | C4              | 1.5291(11) |
| C3   | C5              | 1.5232(12) |

-----•  
<sup>1</sup>2-Y,1+X-Y,+Z; <sup>2</sup>1+Y-X,2-X,+Z; <sup>3</sup>2-X,2-Y,1-Z; <sup>4</sup>1-Y+X,+X,1-Z;  
<sup>5</sup>+Y,1-X+Y,1-Z

**Table S31:** Bond Angles in ° for **A243\_0m**.

| Atom            | Atom | Atom | Angle/°    |
|-----------------|------|------|------------|
| N2              | Co1  | N1   | 85.662(17) |
| N2 <sup>1</sup> | Co1  | N1   | 85.662(17) |

| Atom            | Atom | Atom            | Angle/°    |
|-----------------|------|-----------------|------------|
| N2 <sup>2</sup> | Co1  | N1              | 85.662(17) |
| N2              | Co1  | N2 <sup>1</sup> | 119.433(5) |

| Atom            | Atom | Atom            | Angle/°    | Atom            | Atom | Atom            | Angle/°                                                                                                    |
|-----------------|------|-----------------|------------|-----------------|------|-----------------|------------------------------------------------------------------------------------------------------------|
| N2 <sup>1</sup> | Co1  | N2 <sup>2</sup> | 119.434(5) | O1 <sup>2</sup> | Mg1  | O1 <sup>4</sup> | 87.05(2)                                                                                                   |
| N2              | Co1  | N2 <sup>2</sup> | 119.434(4) | S1              | O1   | Mg1             | 165.08(3)                                                                                                  |
| O1              | S1   | N2              | 105.75(3)  | C1 <sup>1</sup> | N1   | Co1             | 105.45(4)                                                                                                  |
| O1              | S1   | C3              | 105.45(3)  | C1              | N1   | Co1             | 105.45(4)                                                                                                  |
| O2              | S1   | O1              | 115.52(3)  | C1 <sup>2</sup> | N1   | Co1             | 105.45(4)                                                                                                  |
| O2              | S1   | N2              | 114.51(3)  | C1 <sup>2</sup> | N1   | C1              | 113.17(4)                                                                                                  |
| O2              | S1   | C3              | 106.92(3)  | C1 <sup>1</sup> | N1   | C1              | 113.18(4)                                                                                                  |
| N2              | S1   | C3              | 108.14(3)  | C1 <sup>2</sup> | N1   | C1 <sup>1</sup> | 113.18(4)                                                                                                  |
| O1 <sup>3</sup> | Mg1  | O1 <sup>2</sup> | 180.0      | S1              | N2   | Co1             | 115.45(3)                                                                                                  |
| O1 <sup>4</sup> | Mg1  | O1 <sup>5</sup> | 92.95(2)   | C2              | N2   | Co1             | 109.88(4)                                                                                                  |
| O1 <sup>3</sup> | Mg1  | O1 <sup>5</sup> | 92.95(2)   | C2              | N2   | S1              | 122.97(5)                                                                                                  |
| O1 <sup>5</sup> | Mg1  | O1 <sup>1</sup> | 180.0      | N1              | C1   | C2              | 110.45(6)                                                                                                  |
| O1 <sup>3</sup> | Mg1  | O1 <sup>1</sup> | 87.05(2)   | N2              | C2   | C1              | 107.16(6)                                                                                                  |
| O1 <sup>2</sup> | Mg1  | O1 <sup>1</sup> | 92.95(2)   | C6              | C3   | S1              | 108.90(5)                                                                                                  |
| O1 <sup>3</sup> | Mg1  | O1              | 87.05(2)   | C6              | C3   | C4              | 110.24(7)                                                                                                  |
| O1 <sup>3</sup> | Mg1  | O1 <sup>4</sup> | 92.95(2)   | C4              | C3   | S1              | 107.96(5)                                                                                                  |
| O1 <sup>4</sup> | Mg1  | O1              | 180.0      | C5              | C3   | S1              | 107.64(5)                                                                                                  |
| O1 <sup>2</sup> | Mg1  | O1              | 92.95(2)   | C5              | C3   | C6              | 110.27(8)                                                                                                  |
| O1 <sup>1</sup> | Mg1  | O1              | 92.95(2)   | C5              | C3   | C4              | 111.73(7)                                                                                                  |
| O1 <sup>4</sup> | Mg1  | O1 <sup>1</sup> | 87.05(2)   | -----•          |      |                 |                                                                                                            |
| O1 <sup>2</sup> | Mg1  | O1 <sup>5</sup> | 87.05(2)   |                 |      |                 | <sup>1</sup> 1+Y-X,2-X,+Z; <sup>2</sup> 2-Y,1+X-Y,+Z; <sup>3</sup> +Y,1-X+Y,1-Z; <sup>4</sup> 2-X,2-Y,1-Z; |
| O1 <sup>5</sup> | Mg1  | O1              | 87.05(2)   |                 |      |                 | <sup>5</sup> 1-Y+X,+X,1-Z                                                                                  |

**Table S32:** Hydrogen Fractional Atomic Coordinates ( $\times 10^4$ ) and Equivalent Isotropic Displacement Parameters ( $\text{\AA}^2 \times 10^3$ ) for **A243\_0m**.  $U_{eq}$  is defined as 1/3 of the trace of the orthogonalised  $U_{ij}$ .

| Atom | x        | y         | z       | $U_{eq}$ |
|------|----------|-----------|---------|----------|
| H1A  | 8805(13) | 10072(13) | 2575(3) | 20.4(16) |
| H1B  | 9532(13) | 11230(7)  | 2853(5) | 20.4(16) |
| H2A  | 7630(12) | 9096(7)   | 3229(5) | 20.4(16) |
| H2B  | 7599(11) | 10276(12) | 3169(5) | 20.4(16) |
| H6A  | 7616     | 11299     | 5038    | 37       |
| H6B  | 6335     | 10596     | 4766    | 37       |
| H6C  | 7016     | 12045     | 4821    | 37       |
| H4A  | 6290     | 10842     | 3851    | 36       |
| H4B  | 7535     | 11760     | 3585    | 36       |
| H4C  | 6921     | 12275     | 3947    | 36       |
| H5A  | 9502     | 12634     | 4019    | 41       |
| H5B  | 9523     | 12450     | 4586    | 41       |
| H5C  | 9049     | 13313     | 4377    | 41       |

Submitted by: **Christian Wallen**  
Emory University

Solved by: **John Bacsá**

Sample ID: **CMW-03-020**

## Crystal Data and Experimental

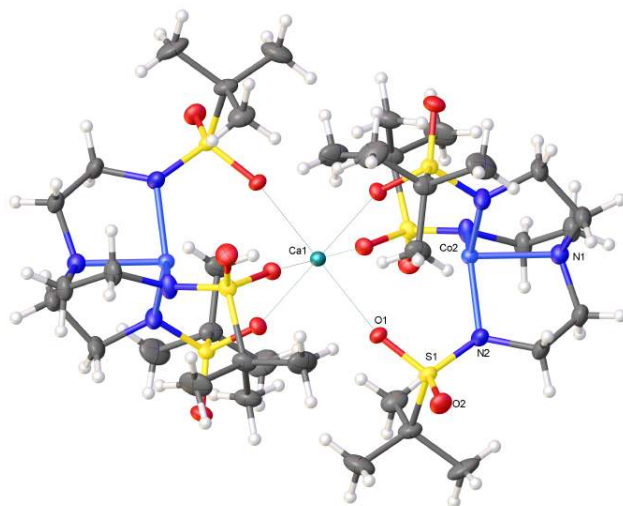

**Experimental.** Single violet prism-shaped crystals of (**CMW-03-020**) were recrystallised from a mixture of diethyl ether and  $\text{CH}_2\text{Cl}_2$  by slow evaporation. A suitable crystal (0.41×0.18×0.11 mm) was selected and mounted on a loop with paratone oil on a Bruker APEX-II CCD diffractometer. The crystal was kept at  $T = 100(2)$  K during data collection. Using **Olex2** (Dolomanov et al., 2009), the structure was solved with the **ShelXT** (Sheldrick, 2015) structure solution program, using the Charge Flipping solution method. The model was refined with version 2013-4 of **ShelXL** (Sheldrick, 2008) using Least Squares minimisation.

**Crystal Data.**  $\text{C}_{36}\text{H}_{78}\text{CaCo}_2\text{N}_8\text{O}_{12}\text{S}_6$ ,  $M_r = 1165.36$ , trigonal, R-3 (No. 148),  $a = 12.601(3)$  Å,  $b = 12.601(3)$  Å,  $c = 29.273(8)$  Å,  $\alpha = 90^\circ$ ,  $\beta = 90^\circ$ ,  $\gamma = 120^\circ$ ,  $V = 4025(2)$  Å<sup>3</sup>,  $T = 100(2)$  K,  $Z = 3$ ,  $Z' = 0.16667$ ,  $\mu(\text{MoK}\alpha) = 1.007$ , 17386 reflections measured, 4461 unique ( $R_{\text{int}} = 0.0389$ ) which were used in all calculations. The final  $wR_2$  was 0.1085 (all data) and  $R_1$  was 0.0409 ( $I > 2(I)$ ).

| Compound                              | CMW-03-020                                                                 |
|---------------------------------------|----------------------------------------------------------------------------|
| Formula                               | $\text{C}_{36}\text{H}_{78}\text{CaCo}_2\text{N}_8\text{O}_{12}\text{S}_6$ |
| $D_{\text{calc.}} / \text{g cm}^{-3}$ | 1.442                                                                      |
| $\mu / \text{mm}^{-1}$                | 1.007                                                                      |
| Formula Weight                        | 1165.36                                                                    |
| Colour                                | violet                                                                     |
| Shape                                 | prism                                                                      |
| Max Size/mm                           | 0.41                                                                       |
| Mid Size/mm                           | 0.18                                                                       |
| Min Size/mm                           | 0.11                                                                       |
| $T / \text{K}$                        | 100(2)                                                                     |
| Crystal System                        | trigonal                                                                   |
| Space Group                           | R-3                                                                        |
| $a / \text{Å}$                        | 12.601(3)                                                                  |
| $b / \text{Å}$                        | 12.601(3)                                                                  |
| $c / \text{Å}$                        | 29.273(8)                                                                  |
| $\alpha / ^\circ$                     | 90                                                                         |
| $\beta / ^\circ$                      | 90                                                                         |
| $\gamma / ^\circ$                     | 120                                                                        |
| $V / \text{Å}^3$                      | 4025(2)                                                                    |
| $Z$                                   | 3                                                                          |
| $Z'$                                  | 1/6                                                                        |
| $\Theta_{\text{min}} / ^\circ$        | 2.087                                                                      |
| $\Theta_{\text{max}} / ^\circ$        | 37.068                                                                     |
| Measured Refl.                        | 17386                                                                      |
| Independent Refl.                     | 4461                                                                       |
| Reflections Used                      | 3518                                                                       |
| $R_{\text{int}}$                      | 0.0389                                                                     |
| Parameters                            | 118                                                                        |
| Restraints                            | 45                                                                         |
| Largest Peak                          | 0.906                                                                      |
| Deepest Hole                          | -0.604                                                                     |
| GooF                                  | 1.032                                                                      |
| $wR_2$ (all data)                     | 0.1085                                                                     |
| $wR_2$                                | 0.0988                                                                     |
| $R_1$ (all data)                      | 0.0580                                                                     |
| $R_1$                                 | 0.0409                                                                     |
| CCDC #                                | 1434436                                                                    |

## Structure Quality Indicators

|              |       |        |            |      |                  |       |          |       |
|--------------|-------|--------|------------|------|------------------|-------|----------|-------|
| Reflections: | d min | 0.59   | $I/\sigma$ | 16.9 | R <sub>int</sub> | 3.89% | complete | 97%   |
| Refinement:  | Shift | -0.002 | Max Peak   | 0.9  | Min Peak         | -0.6  | Goof     | 1.032 |

A violet prism-shaped crystal with dimensions 0.41×0.18×0.11mm was mounted on a loop with paratone oil. Data were collected using a Bruker APEX-II CCD diffractometer equipped with an Oxford Cryosystems low-temperature apparatus operating at  $T = 100(2)$  K.

Data were measured using  $\phi$  and  $\omega$  scans with a narrow frame width with MoK $\alpha$  radiation (fine-focus sealed tube, 45 kV, 35 mA). The total number of runs and images was based on the strategy calculation from the program **APEX2** (Bruker). The actually achieved resolution was  $\Theta = 37.068^\circ$ .

Cell parameters were retrieved using the **SAINT** (Bruker, V8.34A, 2013) software and refined using **SAINT** (Bruker, V8.34A, 2013) on 9971 reflections, 57% of the observed reflections. Data reduction was performed using the **SAINT** (Bruker, V8.34A, 2013) software which corrects for Lorentz polarisation. The final completeness is 99.70 out to 37.068 in  $\Theta$ . The absorption coefficient ( $\mu$ ) of this material is 1.007 mm<sup>-1</sup> and the minimum and maximum transmissions are 0.3299 and 0.4389.

The structure was solved in the space group R-3 (# 148) by Charge Flipping using the **ShelXT** (Sheldrick, 2015) structure solution program and refined by Least Squares using version 2013-4 of **ShelXL** (Sheldrick, 2008). All non-hydrogen atoms were refined anisotropically. The value of Z' is 1/6.

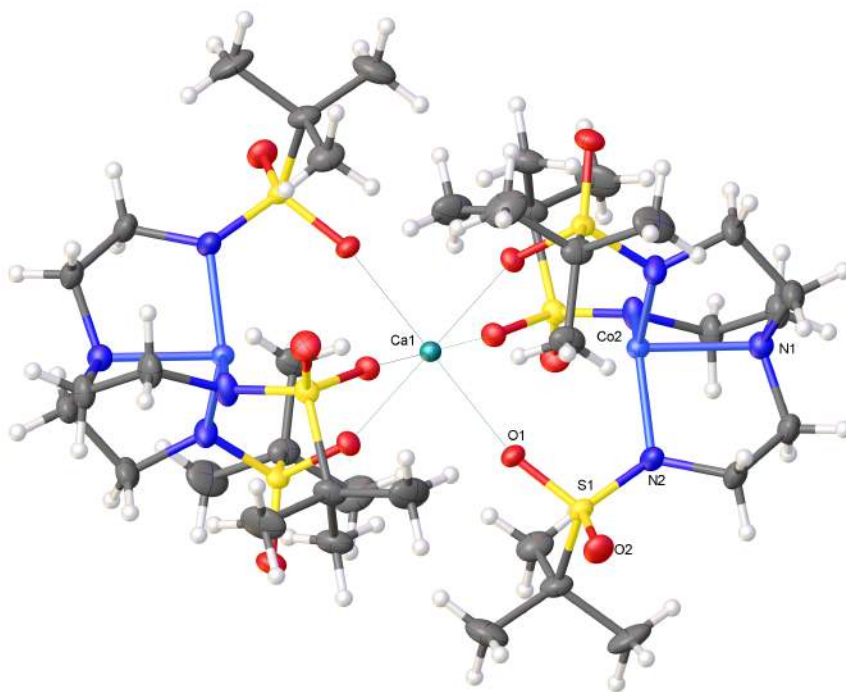

**Figure S22:** Plot of the dimeric Co<sup>2+</sup> complex [C<sub>36</sub>H<sub>78</sub>CaCo<sub>2</sub>N<sub>8</sub>O<sub>12</sub>S<sub>6</sub>]. The molecule resides on a 3-fold rotation axis through the atoms Ca(1), Co(2) and N(1).

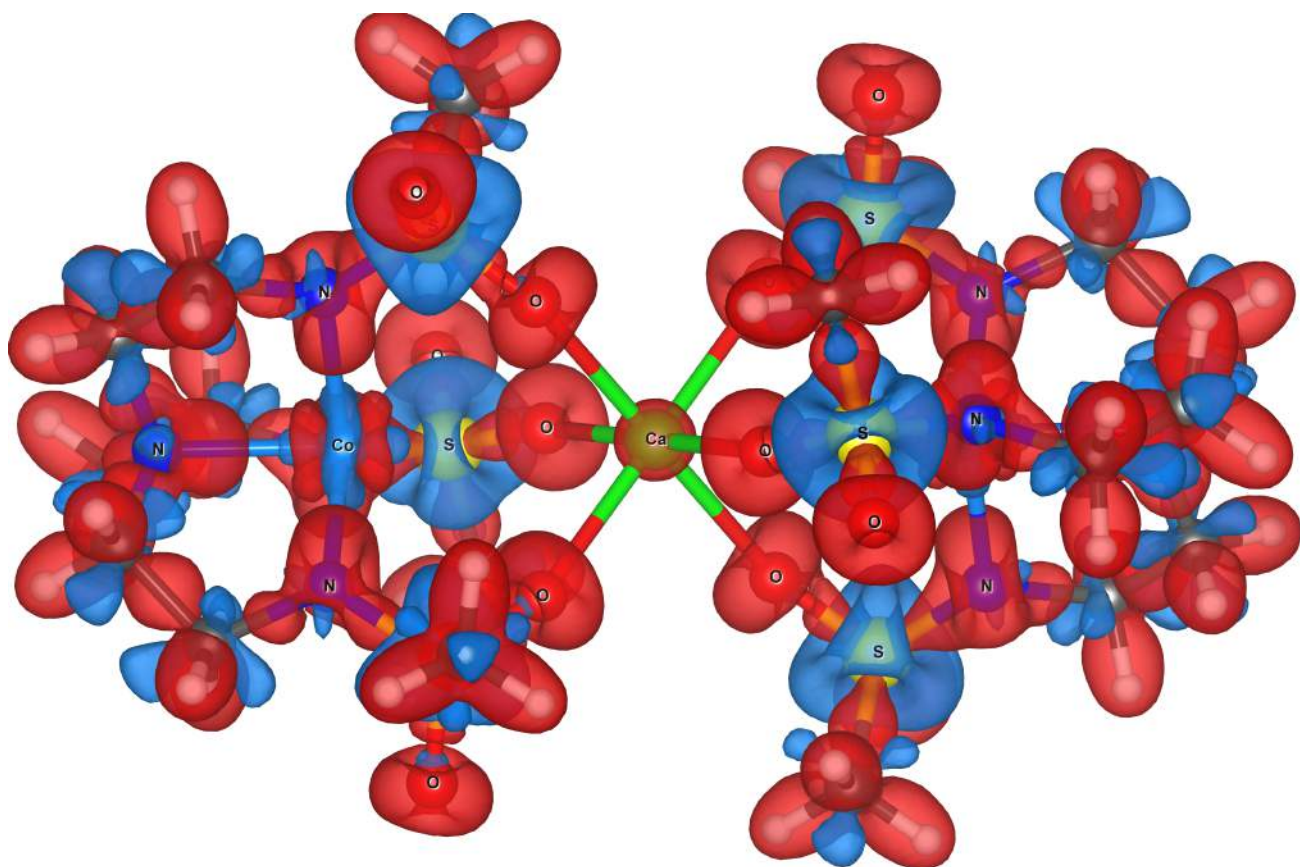

**Figure S23:** Positive and negative deformation density isosurfaces ( $0.01 \text{ e } \text{\AA}^{-3}$ ) of the dimeric  $\text{Co}^{2+}$  complex  $[\text{C}_{36}\text{H}_{78}\text{CaCo}_2\text{N}_8\text{O}_{12}\text{S}_6]$  from refinements with the predicted multipolar parameters. Charge concentrations are shown in red and depletions in blue. There are concentrations of charge corresponding to nitrogen and lone pair electrons. The density about  $\text{Ca}^{2+}$  is spherical and lobes of electron density from N to

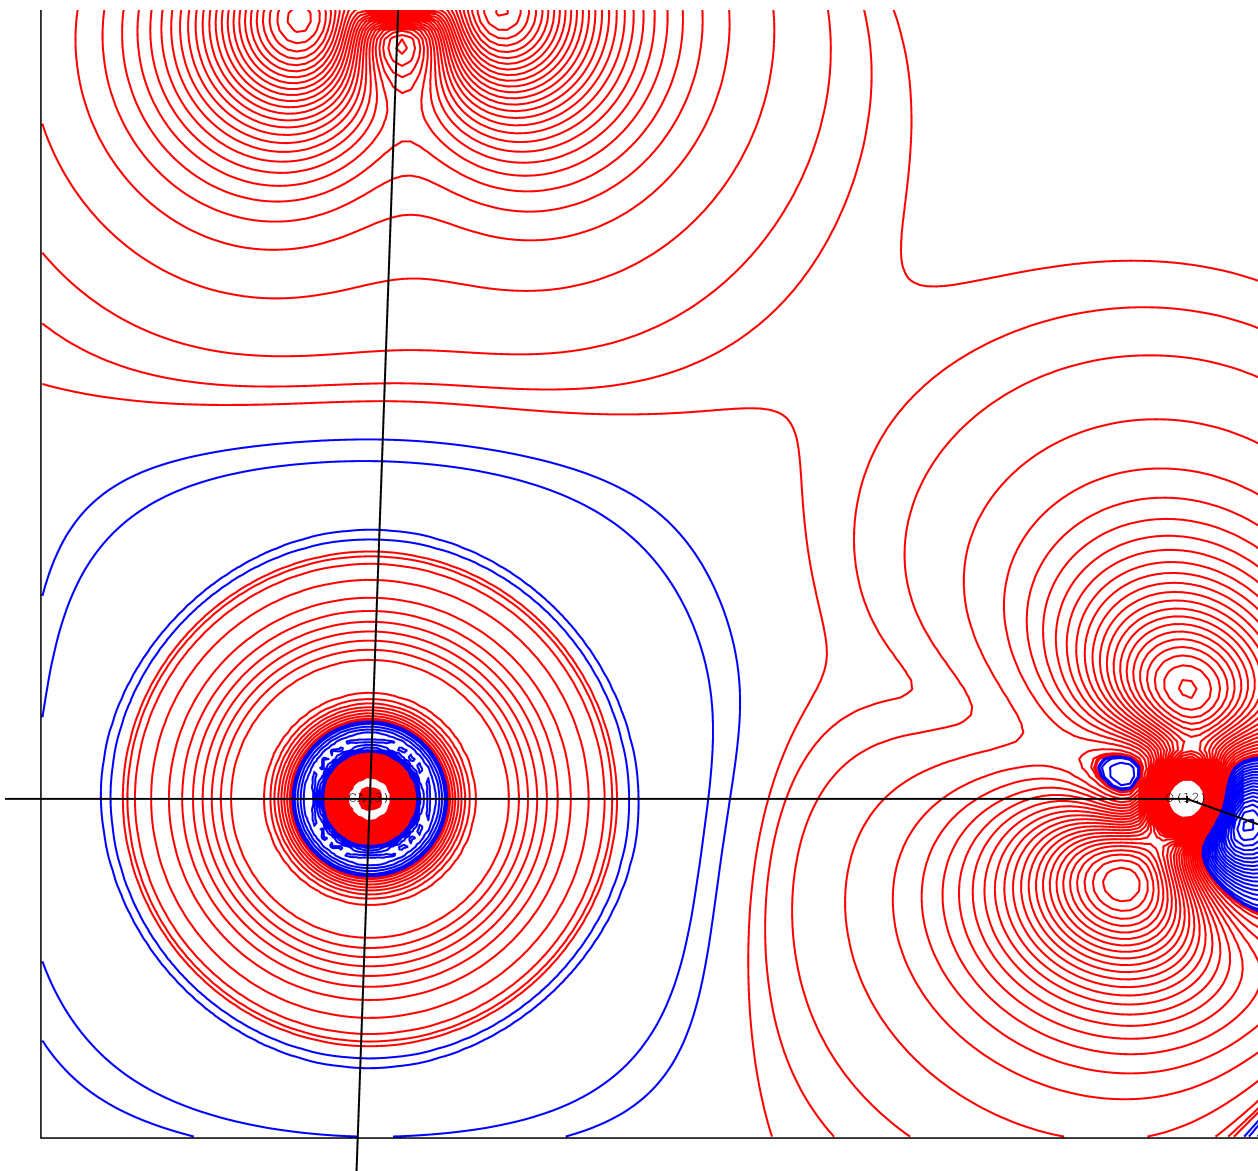

**Figure S24:** A deformation ED maps in the plane of the atoms Ca(1), O(1) and O(3) as calculated from the refinements with the theoretically predicted multipolar parameters. Red lines represent positive contours and blue lines negative contours. Contours are drawn at  $0.1 \text{ e } \text{Å}^{-3}$  intervals.

## Data Plots: Diffraction Data

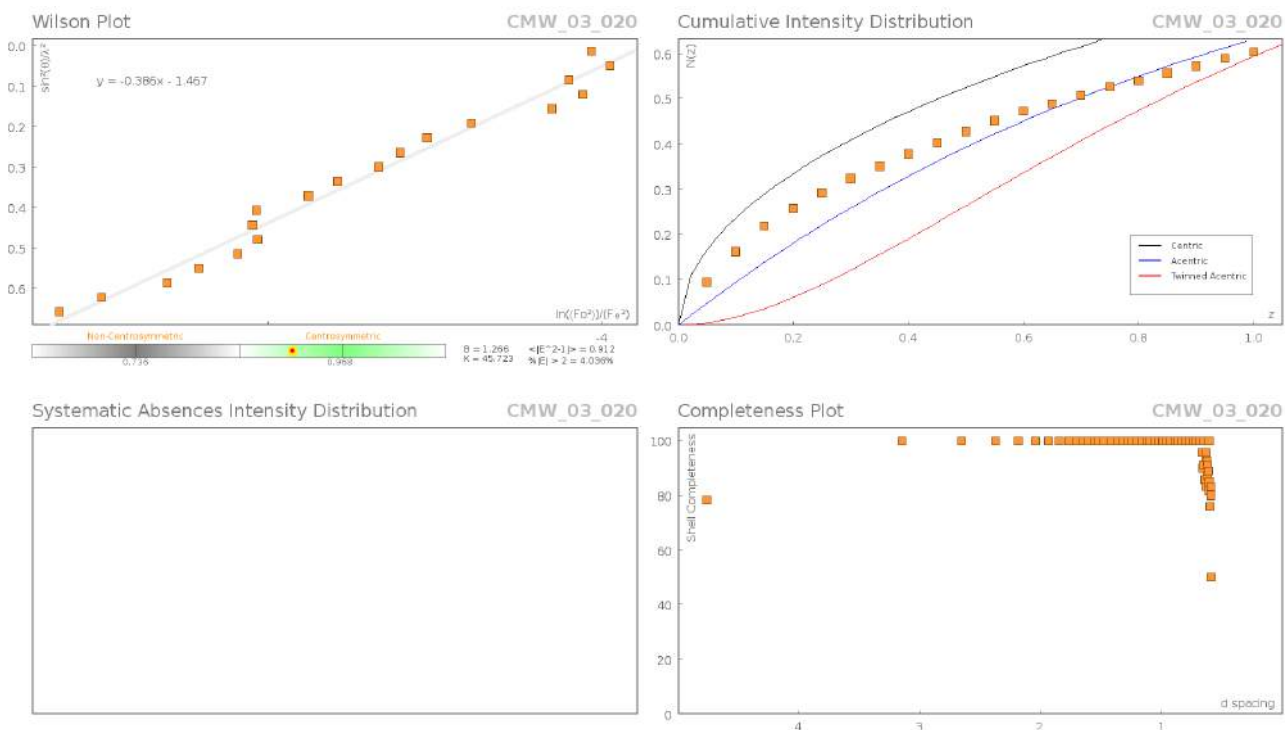

## Data Plots: Refinement and Data

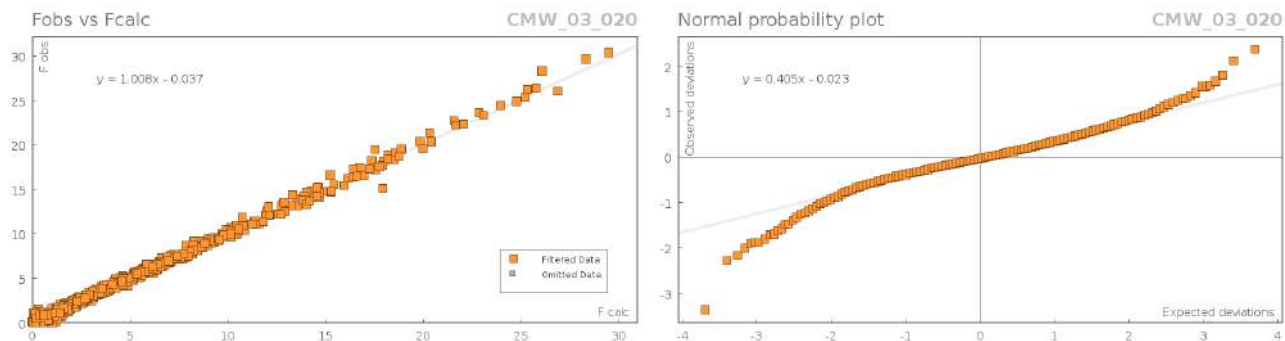

## Reflection Statistics

|                                     |                   |                            |                 |
|-------------------------------------|-------------------|----------------------------|-----------------|
| Total reflections (after filtering) | 17386             | Unique reflections         | 4461            |
| Completeness                        | 0.972             | Mean $I/\sigma$            | 16.87           |
| hklsb>max</sub> collected           | (17, 18, 49)      | hklsb>min</sub> collected  | (-21, -17, -44) |
| hkl <sub>max</sub> used             | (10, 21, 49)      | hkl <sub>min</sub> used    | (-21, 0, 0)     |
| Lim $d_{max}$ collected             | 100.0             | Lim $d_{min}$ collected    | 0.36            |
| $d_{max}$ used                      | 9.76              | $d_{min}$ used             | 0.59            |
| Friedel pairs                       | 3041              | Friedel pairs merged       | 1               |
| Inconsistent equivalents            | 0                 | $R_{int}$                  | 0.0389          |
| $R_{sigma}$                         | 0.0407            | Intensity transformed      | 0               |
| Omitted reflections                 | 0                 | Omitted by user (OMIT hkl) | 0               |
| Multiplicity                        | (9146, 3694, 284) | Maximum multiplicity       | 11              |
| Removed systematic absences         | 0                 | Filtered off (Shel/OMIT)   | 0               |

## Images of the Crystal on the Diffractometer



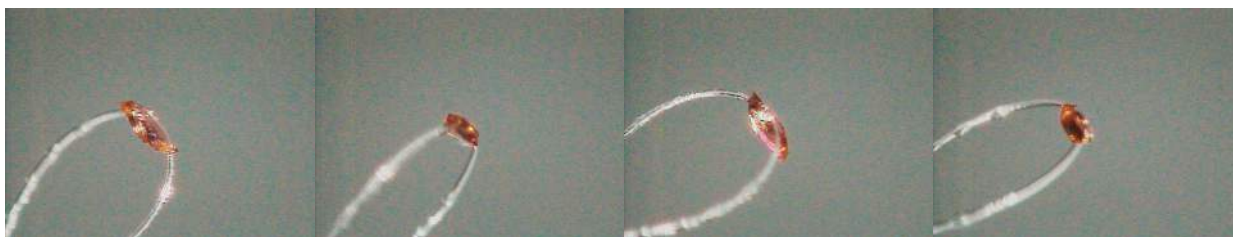

**Table S33:** Fractional Atomic Coordinates ( $\times 10^4$ ) and Equivalent Isotropic Displacement Parameters ( $\text{\AA}^2 \times 10^3$ ) for **CMW\_03\_020**.  $U_{eq}$  is defined as  $1/3$  of the trace of the orthogonalised  $U_{ij}$ .

| Atom | x          | y          | z          | $U_{eq}$  |
|------|------------|------------|------------|-----------|
| C1   | 1273.4(18) | 871(2)     | 2922.5(6)  | 26.6(4)   |
| C2   | 1895(2)    | 1909.4(19) | 3271.4(5)  | 27.5(4)   |
| C1B  | 1073(4)    | 1229(3)    | 2982.7(18) | 26.6(4)   |
| C2B  | 2214(4)    | 1551(7)    | 3267.3(10) | 27.5(4)   |
| C3   | 3679.8(13) | 1840.1(14) | 4274.0(5)  | 25.0(3)   |
| C4   | 4514.4(17) | 2303.0(19) | 3853.8(7)  | 43.0(4)   |
| C5   | 3189.9(16) | 474.9(16)  | 4344.4(6)  | 31.1(3)   |
| C6   | 4349.3(17) | 2558.7(19) | 4701.6(7)  | 40.9(4)   |
| N1   | 0          | 0          | 3072.1(6)  | 22.0(3)   |
| N2   | 1676.0(11) | 1322.6(12) | 3735.1(3)  | 24.2(2)   |
| O1   | 1561.3(8)  | 1499.2(9)  | 4557.4(3)  | 17.64(16) |
| O2   | 2890.9(10) | 3381.5(9)  | 4120.4(3)  | 25.3(2)   |
| S1   | 2394.8(3)  | 2078.0(3)  | 4168.6(2)  | 17.47(7)  |
| Ca1  | 0          | 0          | 5000       | 13.52(10) |
| Co2  | 0          | 0          | 3787.8(2)  | 16.00(7)  |

**Table S34:** Anisotropic Displacement Parameters ( $\times 10^4$ ) **CMW\_03\_020**. The anisotropic displacement factor exponent takes the form:  $-2\pi^2[h^2a^{*2} \times U_{11} + \dots + 2hka^* \times b^* \times U_{12}]$

| Atom | $U_{11}$  | $U_{22}$  | $U_{33}$  | $U_{23}$ | $U_{13}$ | $U_{12}$ |
|------|-----------|-----------|-----------|----------|----------|----------|
| C1   | 28.2(9)   | 28.3(10)  | 17.2(6)   | 1.8(6)   | 3.4(5)   | 9.6(7)   |
| C2   | 26.1(9)   | 29.6(10)  | 18.6(6)   | 3.2(6)   | 4.9(5)   | 7.7(7)   |
| C1B  | 28.2(9)   | 28.3(10)  | 17.2(6)   | 1.8(6)   | 3.4(5)   | 9.6(7)   |
| C2B  | 26.1(9)   | 29.6(10)  | 18.6(6)   | 3.2(6)   | 4.9(5)   | 7.7(7)   |
| C3   | 16.2(6)   | 23.0(6)   | 34.8(6)   | 0.3(5)   | 5.2(5)   | 9.0(5)   |
| C4   | 26.5(8)   | 40.6(10)  | 59.8(11)  | 12.8(8)  | 24.4(8)  | 15.3(8)  |
| C5   | 27.3(7)   | 27.8(8)   | 43.7(8)   | 3.5(6)   | 8.3(6)   | 18.0(6)  |
| C6   | 25.0(8)   | 42.3(10)  | 56.2(10)  | -15.3(8) | -15.9(7) | 17.6(8)  |
| N1   | 22.9(6)   | 22.9(6)   | 20.1(7)   | 0        | 0        | 11.5(3)  |
| N2   | 19.6(5)   | 25.1(6)   | 18.2(4)   | -1.1(4)  | 2.1(3)   | 4.1(4)   |
| O1   | 14.9(4)   | 18.6(4)   | 18.4(3)   | 2.7(3)   | 3.7(3)   | 7.6(3)   |
| O2   | 26.9(5)   | 15.7(4)   | 29.1(4)   | 4.6(3)   | 2.9(4)   | 7.4(4)   |
| S1   | 14.96(13) | 14.96(14) | 19.05(12) | 0.88(9)  | 3.00(9)  | 4.91(11) |
| Ca1  | 12.99(15) | 12.99(15) | 14.57(19) | 0        | 0        | 6.50(7)  |
| Co2  | 15.35(10) | 15.35(10) | 17.31(12) | 0        | 0        | 7.67(5)  |

**Table S35:** Bond Lengths in  $\text{\AA}$  for **CMW\_03\_020**.

| Atom | Atom | Length/ $\text{\AA}$ | Atom | Atom | Length/ $\text{\AA}$ |
|------|------|----------------------|------|------|----------------------|
| C1   | C2   | 1.531(3)             | C3   | C4   | 1.532(2)             |
| C1   | N1   | 1.4866(19)           | C3   | C5   | 1.523(2)             |
| C2   | N2   | 1.5035(19)           | C3   | C6   | 1.528(2)             |
| C1B  | C2B  | 1.531(3)             | C3   | S1   | 1.8145(16)           |
| C1B  | N1   | 1.483(3)             | N1   | Co2  | 2.0949(19)           |
| C2B  | N2   | 1.491(3)             | N2   | S1   | 1.5731(12)           |

| Atom | Atom            | Length/Å   |
|------|-----------------|------------|
| N2   | Co2             | 1.9343(13) |
| O1   | S1              | 1.4712(9)  |
| O1   | Ca1             | 2.3241(10) |
| O2   | S1              | 1.4428(11) |
| Ca1  | O1 <sup>1</sup> | 2.3240(10) |
| Ca1  | O1 <sup>2</sup> | 2.3240(10) |
| Ca1  | O1 <sup>3</sup> | 2.3240(10) |
| Ca1  | O1 <sup>4</sup> | 2.3240(10) |

| Atom | Atom             | Length/Å   |
|------|------------------|------------|
| Ca1  | O1 <sup>5</sup>  | 2.3240(10) |
| Ca1  | Co2              | 3.5486(10) |
| Ca1  | Co2 <sup>2</sup> | 3.5486(10) |
| Co2  | N2 <sup>1</sup>  | 1.9343(13) |
| Co2  | N2 <sup>3</sup>  | 1.9343(13) |

-----•  
<sup>1</sup>+Y-X,-X,+Z; <sup>2</sup>-X,-Y,1-Z; <sup>3</sup>-Y,+X-Y,+Z; <sup>4</sup>-Y+X,+X,1-Z; <sup>5</sup>+Y,-X+Y,1-Z

**Table S36:** Bond Angles in ° for **CMW\_03\_020**.

| Atom            | Atom | Atom            | Angle/°    |
|-----------------|------|-----------------|------------|
| N1              | C1   | C2              | 109.66(15) |
| N2              | C2   | C1              | 106.99(15) |
| N1              | C1B  | C2B             | 115.2(4)   |
| N2              | C2B  | C1B             | 99.9(3)    |
| C4              | C3   | S1              | 107.46(11) |
| C5              | C3   | C4              | 110.62(13) |
| C5              | C3   | C6              | 110.51(14) |
| C5              | C3   | S1              | 108.56(10) |
| C6              | C3   | C4              | 111.20(15) |
| C6              | C3   | S1              | 108.38(11) |
| C1              | N1   | Co2             | 107.14(9)  |
| C1B             | N1   | Co2             | 100.2(2)   |
| C2              | N2   | S1              | 121.46(11) |
| C2              | N2   | Co2             | 110.41(10) |
| C2B             | N2   | S1              | 123.7(2)   |
| C2B             | N2   | Co2             | 115.8(2)   |
| S1              | N2   | Co2             | 120.48(6)  |
| S1              | O1   | Ca1             | 159.82(6)  |
| N2              | S1   | C3              | 109.19(7)  |
| O1              | S1   | C3              | 105.14(6)  |
| O1              | S1   | N2              | 105.77(6)  |
| O2              | S1   | C3              | 106.87(7)  |
| O2              | S1   | N2              | 113.62(7)  |
| O2              | S1   | O1              | 115.82(6)  |
| O1 <sup>1</sup> | Ca1  | O1 <sup>2</sup> | 88.06(3)   |
| O1 <sup>3</sup> | Ca1  | O1              | 91.94(3)   |
| O1 <sup>3</sup> | Ca1  | O1 <sup>4</sup> | 88.06(3)   |
| O1 <sup>5</sup> | Ca1  | O1 <sup>1</sup> | 88.06(3)   |

| Atom            | Atom | Atom             | Angle/°    |
|-----------------|------|------------------|------------|
| O1 <sup>1</sup> | Ca1  | O1               | 91.94(3)   |
| O1 <sup>4</sup> | Ca1  | O1 <sup>2</sup>  | 91.94(3)   |
| O1 <sup>2</sup> | Ca1  | O1               | 180.00(3)  |
| O1 <sup>5</sup> | Ca1  | O1 <sup>2</sup>  | 91.94(3)   |
| O1 <sup>4</sup> | Ca1  | O1 <sup>1</sup>  | 180.0      |
| O1 <sup>3</sup> | Ca1  | O1 <sup>1</sup>  | 91.94(3)   |
| O1 <sup>3</sup> | Ca1  | O1 <sup>2</sup>  | 88.06(3)   |
| O1 <sup>5</sup> | Ca1  | O1               | 88.06(3)   |
| O1 <sup>5</sup> | Ca1  | O1 <sup>3</sup>  | 180.0      |
| O1 <sup>5</sup> | Ca1  | O1 <sup>4</sup>  | 91.94(3)   |
| O1 <sup>4</sup> | Ca1  | O1               | 88.06(3)   |
| O1 <sup>5</sup> | Ca1  | Co2              | 123.88(2)  |
| O1 <sup>2</sup> | Ca1  | Co2              | 123.88(2)  |
| Co2             | Ca1  | Co2 <sup>2</sup> | 180.0      |
| N1              | Co2  | Ca1              | 180.0      |
| N2 <sup>1</sup> | Co2  | N1               | 85.43(3)   |
| N2              | Co2  | N1               | 85.42(3)   |
| N2 <sup>3</sup> | Co2  | N1               | 85.43(3)   |
| N2              | Co2  | N2 <sup>3</sup>  | 119.370(9) |
| N2              | Co2  | N2 <sup>1</sup>  | 119.371(9) |
| N2 <sup>3</sup> | Co2  | N2 <sup>1</sup>  | 119.371(9) |
| N2 <sup>3</sup> | Co2  | Ca1              | 94.57(3)   |
| N2 <sup>1</sup> | Co2  | Ca1              | 94.57(3)   |
| N2              | Co2  | Ca1              | 94.58(3)   |

-----•  
<sup>1</sup>-Y,+X-Y,+Z; <sup>2</sup>-X,-Y,1-Z; <sup>3</sup>+Y-X,-X,+Z; <sup>4</sup>+Y,-X+Y,1-Z; <sup>5</sup>-Y+X,+X,1-Z

**Table S37:** Hydrogen Fractional Atomic Coordinates ( $\times 10^4$ ) and Equivalent Isotropic Displacement Parameters ( $\text{Å}^2 \times 10^3$ ) for **CMW\_03\_020**.  $U_{eq}$  is defined as 1/3 of the trace of the orthogonalised  $U_{ij}$ .

| Atom | x    | y    | z    | $U_{eq}$ |
|------|------|------|------|----------|
| H1A  | 1259 | 1214 | 2620 | 32       |
| H1B  | 1741 | 435  | 2894 | 32       |
| H2B  | 2785 | 2402 | 3209 | 33       |
| H2A  | 1542 | 2455 | 3256 | 33       |
| H1BA | 831  | 1853 | 3041 | 32       |
| H1BB | 1291 | 1279 | 2655 | 32       |
| H2BA | 2551 | 1009 | 3196 | 33       |
| H2BB | 2861 | 2417 | 3225 | 33       |
| H4A  | 4080 | 1794 | 3589 | 65       |
| H4C  | 5256 | 2256 | 3911 | 65       |

| <b>Atom</b> | <b>x</b> | <b>y</b> | <b>z</b> | <b><i>U<sub>eq</sub></i></b> |
|-------------|----------|----------|----------|------------------------------|
| H4B         | 4741     | 3155     | 3792     | 65                           |
| H5B         | 2710(20) | 210(20)  | 4607(8)  | 47                           |
| H5A         | 2710(20) | 20(20)   | 4099(9)  | 47                           |
| H6B         | 4601     | 3425     | 4660     | 61                           |
| H6A         | 5075     | 2480     | 4753     | 61                           |
| H6C         | 3801     | 2232     | 4966     | 61                           |
| H5C         | 3920(20) | 370(20)  | 4381(8)  | 46(6)                        |

Submitted by: **Christian Wallen**  
Emory University

Solved by: **John Bacsá**

Sample ID: **CMW-03-050**

## Crystal Data and Experimental

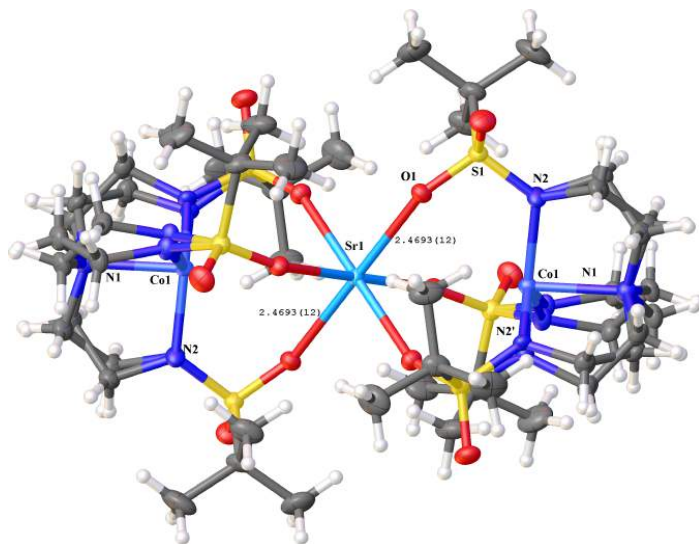

**Experimental.** Single violet prism-shaped crystals of (CMW-03-050) were recrystallised from a mixture of  $\text{CH}_2\text{Cl}_2$ , diethyl ether and methanol by vapor diffusion. A suitable crystal (0.36×0.29×0.20 mm) was selected and mounted on a loop with paratone oil on a Bruker APEX-II CCD diffractometer. The crystal was cooled to  $T = 100(2)$  K during data collection. The structure was solved with the **ShelXT** (Sheldrick, 2015) structure solution program using combined Patterson and dual-space recycling methods and by using **Olex2** (Dolomanov et al., 2009) as the graphical interface. The crystal structure was refined with version of **ShelXL** (Sheldrick, 2008) using Least Squares minimisation.

**Crystal Data.**  $\text{C}_{36}\text{H}_{78}\text{Co}_2\text{N}_8\text{O}_{12}\text{S}_6\text{Sr}$ ,  $M_r = 1212.90$ , trigonal, R-3 (No. 148),  $a = 12.638(4)$  Å,  $b = 12.638(4)$  Å,  $c = 29.797(8)$  Å,  $\alpha = 90^\circ$ ,  $\beta = 90^\circ$ ,  $\gamma = 120^\circ$ ,  $V = 4122(3)$  Å<sup>3</sup>,  $T = 100(2)$  K,  $Z = 3$ ,  $Z' = 1/6$ ,  $\mu(\text{MoK}\alpha) = 1.850$ , 16290 reflections measured, 2798 unique ( $R_{\text{int}} = 0.0343$ ) which were used in all calculations. The final  $wR_2$  was 0.0937 (all data) and  $R_1$  was 0.0363 ( $I > 2\sigma(I)$ ).

| Compound                              | CMW-03-050                                                                        |
|---------------------------------------|-----------------------------------------------------------------------------------|
| Formula                               | $\text{C}_{36}\text{H}_{78}\text{Co}_2\text{N}_8\text{O}_{12}\text{S}_6\text{Sr}$ |
| $D_{\text{calc.}} / \text{g cm}^{-3}$ | 1.466                                                                             |
| $\mu / \text{mm}^{-1}$                | 1.850                                                                             |
| Formula Weight                        | 1212.90                                                                           |
| Colour                                | violet                                                                            |
| Shape                                 | prism                                                                             |
| Max Size/mm                           | 0.36                                                                              |
| Mid Size/mm                           | 0.29                                                                              |
| Min Size/mm                           | 0.20                                                                              |
| $T/\text{K}$                          | 100(2)                                                                            |
| Crystal System                        | trigonal                                                                          |
| Space Group                           | R-3                                                                               |
| $a/\text{Å}$                          | 12.638(4)                                                                         |
| $b/\text{Å}$                          | 12.638(4)                                                                         |
| $c/\text{Å}$                          | 29.797(8)                                                                         |
| $\alpha/^\circ$                       | 90                                                                                |
| $\beta/^\circ$                        | 90                                                                                |
| $\gamma/^\circ$                       | 120                                                                               |
| $V/\text{Å}^3$                        | 4122(3)                                                                           |
| $Z$                                   | 3                                                                                 |
| $Z'$                                  | 0.16667                                                                           |
| $\Theta_{\text{min}}/^\circ$          | 1.982                                                                             |
| $\Theta_{\text{max}}/^\circ$          | 30.513                                                                            |
| Measured Refl.                        | 16290                                                                             |
| Independent Refl.                     | 2798                                                                              |
| $I > 2\sigma(I)$                      | 2518                                                                              |
| $R_{\text{int}}$                      | 0.0343                                                                            |
| Parameters                            | 118                                                                               |
| Restraints                            | 3                                                                                 |
| Largest Peak                          | 0.933                                                                             |
| Deepest Hole                          | -0.441                                                                            |
| GooF                                  | 1.066                                                                             |
| $wR_2$ (all data)                     | 0.0937                                                                            |
| $wR_2$                                | 0.0904                                                                            |
| $R_1$ (all data)                      | 0.0413                                                                            |
| $R_1$                                 | 0.0363                                                                            |
| CCDC #                                | 1434439                                                                           |

## Structure Quality Indicators

|                     |       |       |            |      |                  |       |          |       |
|---------------------|-------|-------|------------|------|------------------|-------|----------|-------|
| <b>Reflections:</b> | d min | 0.70  | $I/\sigma$ | 30.6 | R <sub>int</sub> | 3.43% | complete | 100%  |
| <b>Refinement:</b>  | Shift | 0.000 | Max Peak   | 0.9  | Min Peak         | -0.4  | Goof     | 1.066 |

A violet prism-shaped crystal with dimensions 0.36×0.29×0.20 mm was mounted on a loop with paratone oil. X-ray diffraction data were collected using a Bruker APEX-II CCD diffractometer equipped with an Oxford Cryosystems low-temperature apparatus operating at  $T = 100(2)$  K.

Data were measured using  $\omega$  scans using MoK $\alpha$  radiation (fine-focus sealed tube, 45 kV, 35 mA). The total number of runs and images was based on the strategy calculation from the program **APEX2** (Bruker, 2014). The maximum resolution achieved was  $\Theta = 30.513^\circ$ .

Unit cell indexing was performed by using the **APEX2** (Bruker, 2014) software and refined using **SAINT** (Bruker, V8.34A, 2013) on 5438 reflections, 33% of the observed reflections. Data reduction, scaling and absorption corrections were performed using **SAINT** (Bruker, V8.34A, 2013) and **SADABS-2014/5** (Bruker, 2014) was used for absorption correction.  $wR_2(\text{int})$  was 0.0685 before and 0.0489 after correction. The ratio of minimum to maximum transmission is 0.7793. The  $\lambda/2$  correction factor is 0.00150. The software also corrects for Lorentz polarisation. The final completeness is 100.00 out to 30.513 in  $\Theta$ . The absorption coefficient ( $\mu$ ) of this material is 1.850 and the minimum and maximum transmissions are 0.5814 and 0.7461.

The structure was solved in the space group P1 with the **ShelXT** (Sheldrick, 2015) structure solution program using combined Patterson and dual-space recycling methods. The space group R-3 (# 148) was determined by **ShelXT** (Sheldrick, 2015) structure solution program. The crystal structure was refined by Least Squares using version 2014/7 of **ShelXL** (Sheldrick, 2008). All non-hydrogen atoms were refined anisotropically. Hydrogen atom positions were calculated geometrically and refined using the riding model.

The value of  $Z'$  is 1/6.

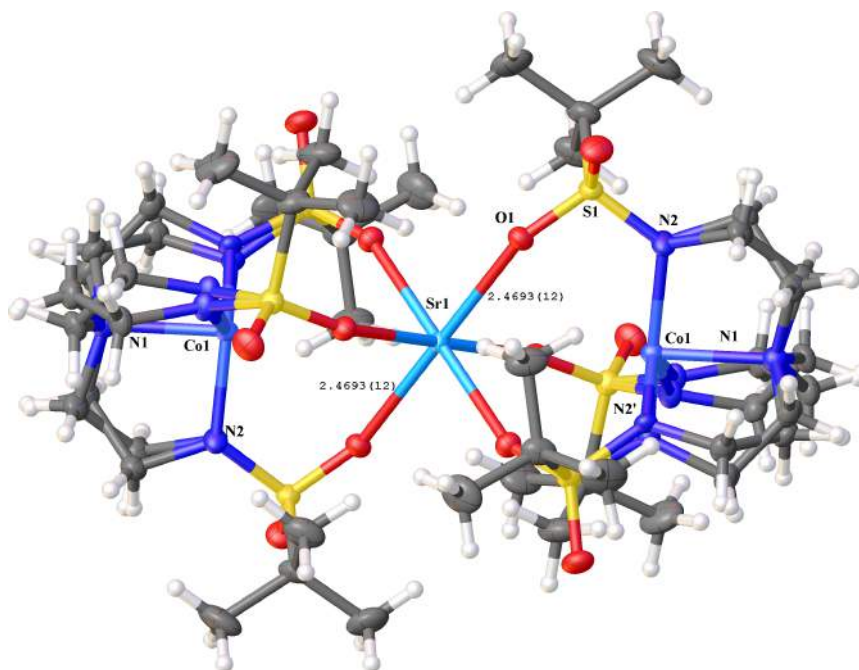

Figure S25:

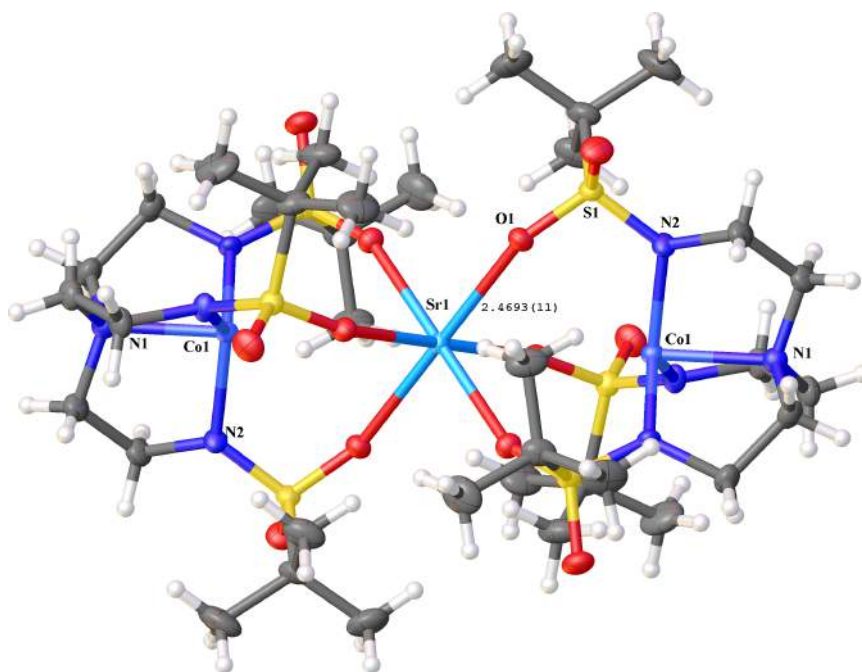

Figure S26:

### Data Plots: Diffraction Data

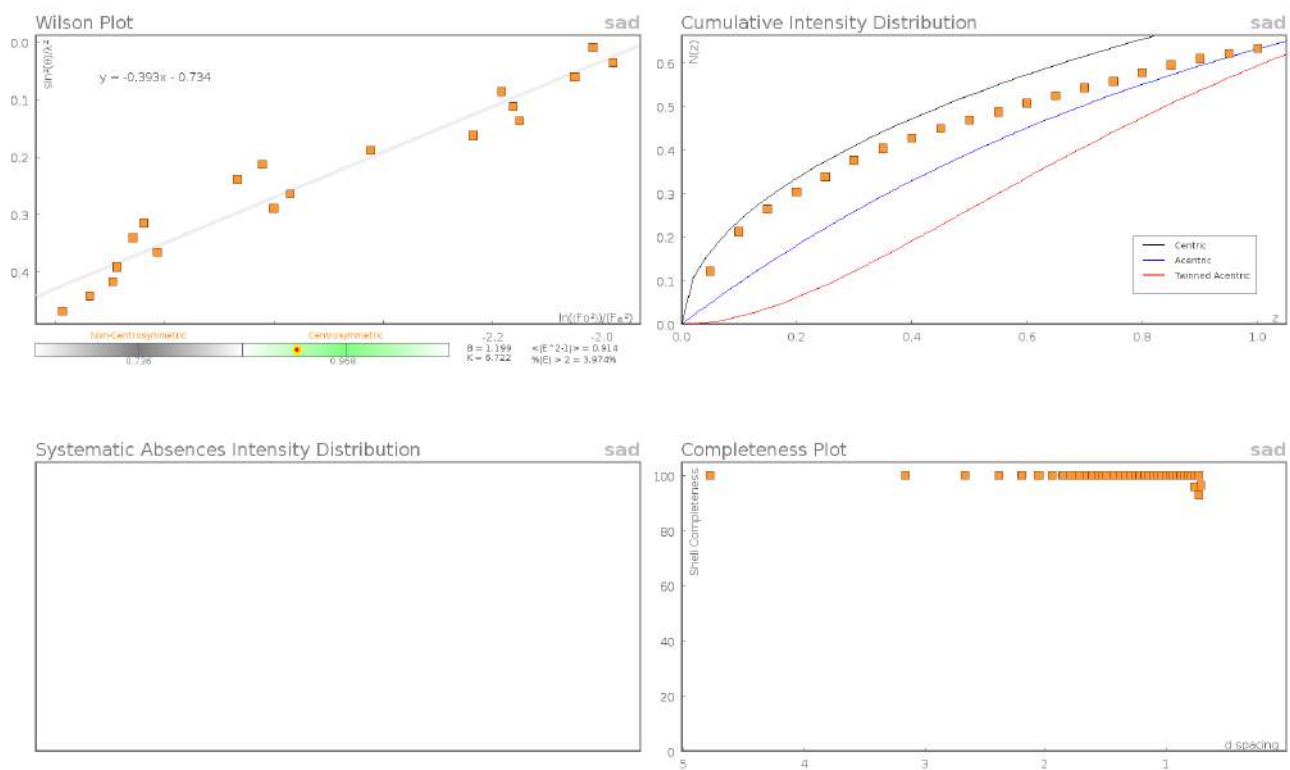

## Data Plots: Refinement and Data

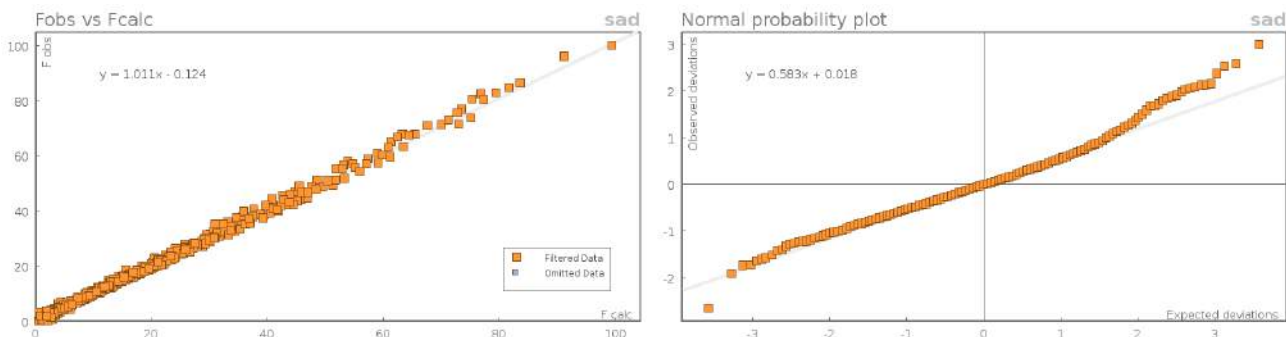

## Reflection Statistics

|                                         |                       |                                         |                 |
|-----------------------------------------|-----------------------|-----------------------------------------|-----------------|
| Total reflections (after filtering)     | 16290                 | Unique reflections                      | 2798            |
| Completeness                            | 0.999                 | Mean $I/\sigma$                         | 30.63           |
| hkl <sub>sub</sub> >max</sub> collected | (17, 17, 42)          | hkl <sub>sub</sub> >min</sub> collected | (-18, -18, -42) |
| hkl <sub>max</sub> used                 | (9, 18, 42)           | hkl <sub>min</sub> used                 | (-18, 0, 0)     |
| Lim d <sub>max</sub> collected          | 100.0                 | Lim d <sub>min</sub> collected          | 0.36            |
| d <sub>max</sub> used                   | 10.27                 | d <sub>min</sub> used                   | 0.7             |
| Friedel pairs                           | 5028                  | Friedel pairs merged                    | 1               |
| Inconsistent equivalents                | 0                     | R <sub>int</sub>                        | 0.0343          |
| R <sub>sigma</sub>                      | 0.023                 | Intensity transformed                   | 0               |
| Omitted reflections                     | 0                     | Omitted by user (OMIT hkl)              | 0               |
| Multiplicity                            | (9327, 2816, 409, 26) | Maximum multiplicity                    | 14              |
| Removed systematic absences             | 0                     | Filtered off (Shel/OMIT)                | 0               |

## Images of the Crystal on the Diffractometer

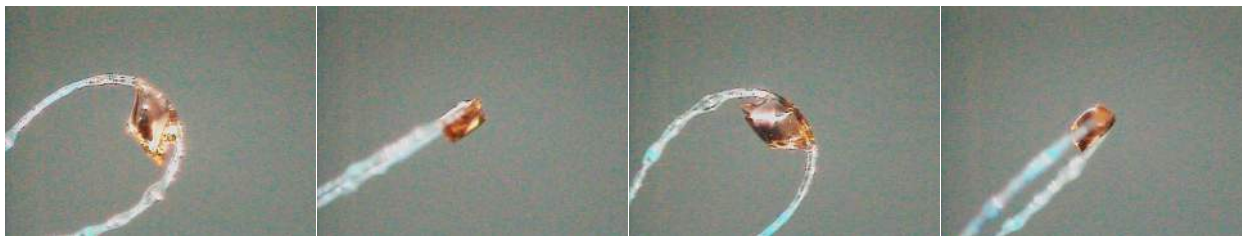

**Table S38:** Fractional Atomic Coordinates ( $\times 10^4$ ) and Equivalent Isotropic Displacement Parameters ( $\text{\AA}^2 \times 10^3$ ) for **CMW-03-050**.  $U_{eq}$  is defined as  $1/3$  of the trace of the orthogonalised  $U_{ij}$ .

| Atom | x          | y          | z          | $U_{eq}$ |
|------|------------|------------|------------|----------|
| C1   | 2932(4)    | 7540(3)    | -403.6(12) | 24.2(7)  |
| C2   | 3377(4)    | 8594(3)    | -68.9(10)  | 24.2(7)  |
| N2   | 3053(7)    | 8057(6)    | 386.7(9)   | 18.9(12) |
| C1'  | 3440(5)    | 7857(5)    | -368.4(16) | 22.1(10) |
| C2'  | 2666(5)    | 8172(5)    | -62.4(13)  | 22.3(12) |
| N2'  | 2801(11)   | 7835(9)    | 401.6(11)  | 18.9(12) |
| C3   | 1426.8(16) | 8441.7(17) | 921.2(7)   | 25.8(4)  |
| C4   | 979(2)     | 8815(2)    | 506.3(9)   | 44.6(6)  |
| C5   | 1481(2)    | 9191(2)    | 1330.9(9)  | 41.7(5)  |
| C6   | 608.0(18)  | 7073.0(19) | 1011.7(9)  | 35.2(5)  |
| N1   | 3333       | 6667       | -255.7(8)  | 19.5(5)  |
| O1   | 3292.9(11) | 8256.3(11) | 1197.0(4)  | 18.8(2)  |

| Atom | x          | y           | z        | $U_{eq}$  |
|------|------------|-------------|----------|-----------|
| O2   | 3707.2(13) | 10050.4(12) | 735.6(5) | 27.4(3)   |
| S1   | 2965.5(4)  | 8746.4(3)   | 806.9(2) | 17.51(10) |
| Co1  | 3333       | 6667        | 444.7(2) | 14.58(10) |
| Sr1  | 3333       | 6667        | 1667     | 14.27(10) |

**Table S39:** Anisotropic Displacement Parameters ( $\times 10^4$ ) **CMW-03-050**. The anisotropic displacement factor exponent takes the form:  $-2\pi^2[h^2a^{*2} \times U_{11} + \dots + 2hka^* \times b^* \times U_{12}]$

| Atom | $U_{11}$  | $U_{22}$  | $U_{33}$  | $U_{23}$  | $U_{13}$  | $U_{12}$  |
|------|-----------|-----------|-----------|-----------|-----------|-----------|
| C1   | 30.6(18)  | 24.2(13)  | 19.7(11)  | 5.9(9)    | 2.9(10)   | 15.2(12)  |
| C2   | 30.6(18)  | 24.2(13)  | 19.7(11)  | 5.9(9)    | 2.9(10)   | 15.2(12)  |
| N2   | 27(3)     | 13(2)     | 17.0(7)   | 2.3(7)    | 1.3(8)    | 10(3)     |
| C1'  | 27(2)     | 18(2)     | 19(2)     | 6.5(16)   | 6.6(19)   | 9.8(19)   |
| C2'  | 28(3)     | 25(2)     | 18.3(19)  | 2.3(15)   | -0.3(16)  | 17(2)     |
| N2'  | 27(3)     | 13(2)     | 17.0(7)   | 2.3(7)    | 1.3(8)    | 10(3)     |
| C3   | 21.1(8)   | 23.0(8)   | 37.5(10)  | -0.3(7)   | -5.2(7)   | 14.1(7)   |
| C4   | 38.6(12)  | 37.7(11)  | 63.4(16)  | 7.0(11)   | -17.4(11) | 23.5(10)  |
| C5   | 34.0(11)  | 44.9(12)  | 55.8(14)  | -11.7(11) | 4.5(10)   | 26.9(10)  |
| C6   | 19.1(8)   | 28.6(9)   | 54.9(14)  | 6.8(9)    | -3.2(8)   | 9.6(7)    |
| N1   | 19.0(6)   | 19.0(6)   | 20.6(12)  | 0         | 0         | 9.5(3)    |
| O1   | 19.1(5)   | 20.1(5)   | 19.1(6)   | 2.0(4)    | -1.0(4)   | 11.1(4)   |
| O2   | 31.9(7)   | 17.0(6)   | 31.9(7)   | 5.4(5)    | 5.1(5)    | 11.3(5)   |
| S1   | 21.37(19) | 15.38(18) | 18.43(19) | 1.18(13)  | -0.20(14) | 11.18(15) |
| Co1  | 13.93(12) | 13.93(12) | 15.89(19) | 0         | 0         | 6.97(6)   |
| Sr1  | 14.74(12) | 14.74(12) | 13.33(17) | 0         | 0         | 7.37(6)   |

**Table S40:** Bond Lengths in Å for **CMW-03-050**.

| Atom | Atom             | Length/Å   | Atom   | Atom             | Length/Å                                                                                               |
|------|------------------|------------|--------|------------------|--------------------------------------------------------------------------------------------------------|
| C1   | C2               | 1.529(3)   | O1     | S1               | 1.4706(12)                                                                                             |
| C1   | N1               | 1.493(4)   | O1     | Sr1 <sup>3</sup> | 2.4697(13)                                                                                             |
| C2   | N2               | 1.481(3)   | O1     | Sr1              | 2.4697(13)                                                                                             |
| N2   | S1               | 1.561(4)   | O2     | S1               | 1.4474(14)                                                                                             |
| N2   | Co1              | 1.965(6)   | Co1    | N2 <sup>2</sup>  | 1.965(6)                                                                                               |
| C1'  | C2'              | 1.529(4)   | Co1    | N2 <sup>1</sup>  | 1.965(6)                                                                                               |
| C1'  | N1               | 1.480(5)   | Co1    | N2' <sup>2</sup> | 1.909(9)                                                                                               |
| C2'  | N2'              | 1.481(3)   | Co1    | N2' <sup>1</sup> | 1.909(9)                                                                                               |
| N2'  | S1               | 1.609(7)   | Co1    | Sr1 <sup>3</sup> | 3.6411(10)                                                                                             |
| N2'  | Co1              | 1.909(9)   | Co1    | Sr1              | 3.6411(10)                                                                                             |
| C3   | C4               | 1.529(3)   | Sr1    | O1 <sup>4</sup>  | 2.4697(13)                                                                                             |
| C3   | C5               | 1.526(3)   | Sr1    | O1 <sup>5</sup>  | 2.4697(13)                                                                                             |
| C3   | C6               | 1.532(3)   | Sr1    | O1 <sup>3</sup>  | 2.4697(13)                                                                                             |
| C3   | S1               | 1.8158(19) | Sr1    | O1 <sup>2</sup>  | 2.4697(13)                                                                                             |
| N1   | C1 <sup>1</sup>  | 1.493(4)   | Sr1    | Sr1 <sup>3</sup> | 0.0000                                                                                                 |
| N1   | C1 <sup>2</sup>  | 1.493(4)   | -----• |                  |                                                                                                        |
| N1   | C1' <sup>1</sup> | 1.480(5)   |        |                  | <sup>1</sup> +Y-X,1-X,+Z; <sup>2</sup> 1-Y,1+X-Y,+Z; <sup>3</sup> 2/3-X,4/3-Y,1/3-Z; <sup>4</sup> 2/3- |
| N1   | C1' <sup>2</sup> | 1.480(5)   |        |                  | Y+X,1/3+X,1/3-Z; <sup>5</sup> -1/3+Y,1/3-X+Y,1/3-Z                                                     |
| N1   | Co1              | 2.087(3)   |        |                  |                                                                                                        |

**Table S41:** Bond Angles in ° for **CMW-03-050**.

| Atom | Atom | Atom | Angle/°  | Atom | Atom | Atom | Angle/°  |
|------|------|------|----------|------|------|------|----------|
| N1   | C1   | C2   | 109.8(3) | C2   | N2   | Co1  | 111.0(3) |
| N2   | C2   | C1   | 107.5(3) | S1   | N2   | Co1  | 121.6(2) |
| C2   | N2   | S1   | 124.0(4) | N1   | C1'  | C2'  | 112.6(3) |



| Atom             | Atom | Atom             | Angle/°    |
|------------------|------|------------------|------------|
| N2'              | C2'  | C1'              | 107.6(3)   |
| C2'              | N2'  | S1               | 119.2(5)   |
| C2'              | N2'  | Co1              | 114.9(4)   |
| S1               | N2'  | Co1              | 122.3(4)   |
| C4               | C3   | C6               | 110.19(17) |
| C4               | C3   | S1               | 107.79(15) |
| C5               | C3   | C4               | 111.34(18) |
| C5               | C3   | C6               | 110.82(19) |
| C5               | C3   | S1               | 107.93(13) |
| C6               | C3   | S1               | 108.65(12) |
| C1               | N1   | C1 <sup>1</sup>  | 111.67(15) |
| C1 <sup>2</sup>  | N1   | C1 <sup>1</sup>  | 111.67(15) |
| C1               | N1   | C1 <sup>2</sup>  | 111.67(15) |
| C1 <sup>2</sup>  | N1   | Co1              | 107.17(16) |
| C1               | N1   | Co1              | 107.17(16) |
| C1 <sup>1</sup>  | N1   | Co1              | 107.17(16) |
| C1'              | N1   | C1 <sup>11</sup> | 115.01(16) |
| C1'              | N1   | C1 <sup>12</sup> | 115.01(16) |
| C1 <sup>12</sup> | N1   | C1 <sup>11</sup> | 115.01(16) |
| C1 <sup>12</sup> | N1   | Co1              | 103.1(2)   |
| C1 <sup>11</sup> | N1   | Co1              | 103.1(2)   |
| C1'              | N1   | Co1              | 103.1(2)   |
| S1               | O1   | Sr1 <sup>3</sup> | 156.23(7)  |
| S1               | O1   | Sr1              | 156.23(7)  |
| Sr1 <sup>3</sup> | O1   | Sr1              | 0.0        |
| N2               | S1   | C3               | 113.6(3)   |
| N2'              | S1   | C3               | 104.3(4)   |
| O1               | S1   | N2               | 106.6(2)   |
| O1               | S1   | N2'              | 104.8(2)   |
| O1               | S1   | C3               | 105.04(8)  |
| O2               | S1   | N2               | 109.4(2)   |
| O2               | S1   | N2'              | 118.9(3)   |
| O2               | S1   | C3               | 106.51(8)  |
| O2               | S1   | O1               | 115.93(8)  |
| N2               | Co1  | N2 <sup>2</sup>  | 119.23(2)  |
| N2               | Co1  | N2 <sup>1</sup>  | 119.24(2)  |
| N2 <sup>2</sup>  | Co1  | N2 <sup>1</sup>  | 119.24(2)  |
| N2               | Co1  | N1               | 84.96(8)   |
| N2 <sup>2</sup>  | Co1  | N1               | 84.96(8)   |
| N2 <sup>1</sup>  | Co1  | N1               | 84.96(8)   |

| Atom             | Atom | Atom             | Angle/°   |
|------------------|------|------------------|-----------|
| N2               | Co1  | Sr1 <sup>3</sup> | 95.04(8)  |
| N2 <sup>1</sup>  | Co1  | Sr1 <sup>3</sup> | 95.04(8)  |
| N2 <sup>2</sup>  | Co1  | Sr1 <sup>3</sup> | 95.04(8)  |
| N2 <sup>1</sup>  | Co1  | Sr1              | 95.04(8)  |
| N2               | Co1  | Sr1              | 95.04(8)  |
| N2 <sup>2</sup>  | Co1  | Sr1              | 95.04(8)  |
| N2 <sup>2</sup>  | Co1  | N2 <sup>1</sup>  | 119.55(2) |
| N2'              | Co1  | N2 <sup>2</sup>  | 119.55(2) |
| N2'              | Co1  | N2 <sup>1</sup>  | 119.55(2) |
| N2 <sup>2</sup>  | Co1  | N1               | 86.14(10) |
| N2'              | Co1  | N1               | 86.14(10) |
| N2 <sup>1</sup>  | Co1  | N1               | 86.14(10) |
| N2 <sup>1</sup>  | Co1  | Sr1 <sup>3</sup> | 93.86(10) |
| N2 <sup>1</sup>  | Co1  | Sr1              | 93.86(10) |
| N2 <sup>2</sup>  | Co1  | Sr1              | 93.86(10) |
| N2 <sup>2</sup>  | Co1  | Sr1 <sup>3</sup> | 93.86(10) |
| N2'              | Co1  | Sr1              | 93.86(10) |
| N2'              | Co1  | Sr1 <sup>3</sup> | 93.86(10) |
| N1               | Co1  | Sr1              | 180.0     |
| N1               | Co1  | Sr1 <sup>3</sup> | 180.0     |
| Sr1 <sup>3</sup> | Co1  | Sr1              | 0.0       |
| O1 <sup>4</sup>  | Sr1  | O1 <sup>5</sup>  | 91.05(4)  |
| O1 <sup>4</sup>  | Sr1  | O1 <sup>3</sup>  | 91.05(4)  |
| O1 <sup>5</sup>  | Sr1  | O1 <sup>2</sup>  | 180.00(6) |
| O1               | Sr1  | O1 <sup>2</sup>  | 91.05(4)  |
| O1 <sup>5</sup>  | Sr1  | O1               | 88.95(4)  |
| O1 <sup>4</sup>  | Sr1  | O1 <sup>2</sup>  | 88.95(4)  |
| O1 <sup>5</sup>  | Sr1  | O1 <sup>3</sup>  | 91.05(4)  |
| O1 <sup>4</sup>  | Sr1  | O1               | 88.95(4)  |
| O1               | Sr1  | O1 <sup>3</sup>  | 180.0     |
| O1 <sup>3</sup>  | Sr1  | O1 <sup>2</sup>  | 88.95(4)  |
| Sr1 <sup>3</sup> | Sr1  | O1 <sup>2</sup>  | 0(10)     |
| Sr1 <sup>3</sup> | Sr1  | O1               | 0(10)     |
| Sr1 <sup>3</sup> | Sr1  | O1 <sup>3</sup>  | 0(10)     |
| Sr1 <sup>3</sup> | Sr1  | O1 <sup>4</sup>  | 0(10)     |
| Sr1 <sup>3</sup> | Sr1  | O1 <sup>5</sup>  | 0(10)     |

-----●  
<sup>1</sup>+Y-X,1-X,+Z; <sup>2</sup>1-Y,1+X-Y,+Z; <sup>3</sup>2/3-X,4/3-Y,1/3-Z; <sup>4</sup>2/3-Y+X,1/3+X,1/3-Z; <sup>5</sup>-1/3+Y,1/3-X+Y,1/3-Z

**Table S42:** Hydrogen Fractional Atomic Coordinates ( $\times 10^4$ ) and Equivalent Isotropic Displacement Parameters ( $\text{\AA}^2 \times 10^3$ ) for **CMW-03-050**.  $U_{eq}$  is defined as 1/3 of the trace of the orthogonalised  $U_{ij}$ .

| Atom | x    | y     | z    | $U_{eq}$ |
|------|------|-------|------|----------|
| H1A  | 2048 | 7120  | -423 | 29       |
| H1B  | 3263 | 7857  | -699 | 29       |
| H2A  | 4255 | 9123  | -94  | 29       |
| H2B  | 2989 | 9075  | -129 | 29       |
| H1'A | 3187 | 7836  | -677 | 27       |
| H1'B | 4290 | 8493  | -344 | 27       |
| H2'B | 2944 | 9038  | -80  | 27       |
| H2'A | 1816 | 7721  | -154 | 27       |
| H4A  | 200  | 8743  | 569  | 67       |
| H4C  | 897  | 8289  | 260  | 67       |
| H4B  | 1557 | 9645  | 429  | 67       |
| H5A  | 2035 | 10041 | 1274 | 63       |

| <b>Atom</b> | <b>x</b> | <b>y</b> | <b>z</b> | <b><math>U_{eq}</math></b> |
|-------------|----------|----------|----------|----------------------------|
| H5C         | 1759     | 8934     | 1586     | 63                         |
| H5B         | 681      | 9070     | 1391     | 63                         |
| H6A         | -223     | 6888     | 1046     | 53                         |
| H6B         | 871      | 6858     | 1282     | 53                         |
| H6C         | 663      | 6616     | 764      | 53                         |

Submitted by: **Christian Wallen**  
Emory University

Solved by: **John Bacsá**

Sample ID: **[Co2Ba] cluster**

## Crystal Data and Experimental

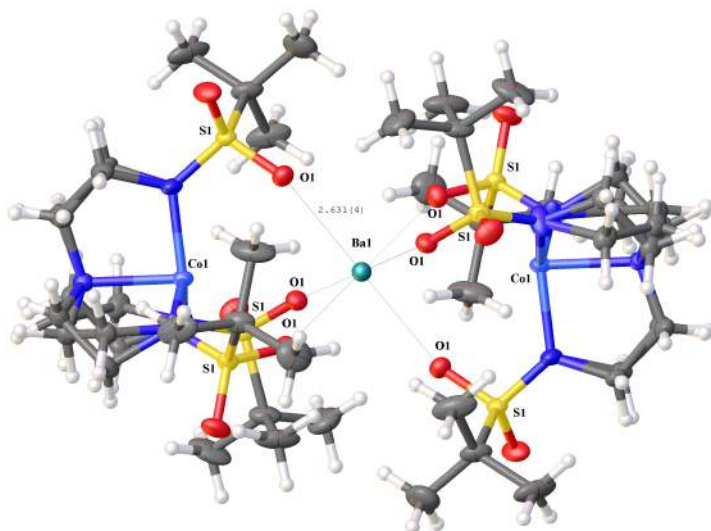

**Experimental.** Single violet prism-shaped crystals of (**CoBaCoBus**) were recrystallised from a mixture of  $\text{CH}_2\text{Cl}_2$  and methanol by vapor diffusion. A suitable crystal ( $0.38 \times 0.30 \times 0.30$ ) was selected and mounted on a loop with paratone oil on a Bruker APEX-II CCD diffractometer. The crystal was cooled to  $T = 100(2)$  K during data collection. The structure was solved with the **Superflip** (L. Palatinus & G. Chapuis, 2007) structure solution program using a charge flipping algorithm and by using **Olex2** (Dolomanov et al., 2009) as the graphical interface. The crystal structure was refined with version 2013-4 of **SHELXL** (Sheldrick, 2008) using Least Squares minimisation.

**Crystal Data.**  $\text{C}_{36}\text{H}_{78}\text{BaCo}_2\text{N}_8\text{O}_{12}\text{S}_6$ ,  $M_r = 1262.62$ , trigonal, R-3 (No. 148),  $a = 12.6571(8)$  Å,  $b = 12.6571(8)$  Å,  $c = 30.388(2)$  Å,  $\alpha = 90^\circ$ ,  $\beta = 90^\circ$ ,  $\gamma = 120^\circ$ ,  $V = 4216.0(6)$  Å<sup>3</sup>,  $T = 100(2)$  K,  $Z = 3$ ,  $Z' = 1/6$ ,  $\mu(\text{MoK}\alpha) = 1.556$ , 36251 reflections measured, 5154 unique ( $R_{\text{int}} = 0.0276$ ) which were used in all calculations. The final  $wR_2$  was 0.1500 (all data) and  $R_1$  was 0.0627 ( $I > 2(I)$ ).

| Compound                              | CoBaCoBus                                                                  |
|---------------------------------------|----------------------------------------------------------------------------|
| Formula                               | $\text{C}_{36}\text{H}_{78}\text{BaCo}_2\text{N}_8\text{O}_{12}\text{S}_6$ |
| $D_{\text{calc.}} / \text{g cm}^{-3}$ | 1.492                                                                      |
| $\mu / \text{mm}^{-1}$                | 1.556                                                                      |
| Formula Weight                        | 1262.62                                                                    |
| Colour                                | violet                                                                     |
| Shape                                 | prism                                                                      |
| Max Size/mm                           | 0.38                                                                       |
| Mid Size/mm                           | 0.30                                                                       |
| Min Size/mm                           | 0.30                                                                       |
| $T/\text{K}$                          | 100(2)                                                                     |
| Crystal System                        | trigonal                                                                   |
| Space Group                           | R-3                                                                        |
| $a/\text{Å}$                          | 12.6571(8)                                                                 |
| $b/\text{Å}$                          | 12.6571(8)                                                                 |
| $c/\text{Å}$                          | 30.388(2)                                                                  |
| $\alpha/^\circ$                       | 90                                                                         |
| $\beta/^\circ$                        | 90                                                                         |
| $\gamma/^\circ$                       | 120                                                                        |
| $V/\text{Å}^3$                        | 4216.0(6)                                                                  |
| $Z$                                   | 3                                                                          |
| $Z'$                                  | 1/6                                                                        |
| $\Theta_{\text{min}}/^\circ$          | 2.011                                                                      |
| $\Theta_{\text{max}}/^\circ$          | 38.564                                                                     |
| Measured Refl.                        | 36251                                                                      |
| Independent Refl.                     | 5154                                                                       |
| $I > 2\sigma(I)$                      | 4927                                                                       |
| $R_{\text{int}}$                      | 0.0276                                                                     |
| Parameters                            | 120                                                                        |
| Restraints                            | 0                                                                          |
| Largest Peak                          | 1.686                                                                      |
| Deepest Hole                          | -1.346                                                                     |
| GooF                                  | 1.357                                                                      |
| $wR_2$ (all data)                     | 0.1500                                                                     |
| $wR_2$                                | 0.1493                                                                     |
| $R_1$ (all data)                      | 0.0645                                                                     |
| $R_1$                                 | 0.0627                                                                     |
| CCDC #                                | 1434435                                                                    |

## Structure Quality Indicators

|              |       |        |            |      |                  |       |          |       |
|--------------|-------|--------|------------|------|------------------|-------|----------|-------|
| Reflections: | d min | 0.57   | $I/\sigma$ | 43.9 | R <sub>int</sub> | 2.76% | complete | 97%   |
| Refinement:  | Shift | -0.002 | Max Peak   | 1.7  | Min Peak         | -1.4  | Goof     | 1.357 |

A violet prism-shaped crystal with dimensions 0.38×0.30×0.30 mm was mounted on a loop with paratone oil. X-ray diffraction data were collected using a Bruker APEX-II CCD diffractometer equipped with an Oxford Cryosystems low-temperature apparatus operating at  $T = 100(2)$  K.

Data were measured using  $\omega$  scans with MoK $\alpha$  radiation (fine-focus sealed tube, 45 kV, 35 mA). The total number of runs and images was based on the strategy calculation from the program **APEX2** (Bruker). The maximum resolution achieved was  $\theta = 38.5^\circ$ .

Unit cell indexing was performed by using the **APEX2** (Bruker) software and refined using **SAINT** (Bruker, V8.34A, 2013) on 9797 reflections, 27% of the observed reflections. Data reduction, scaling and absorption corrections were performed using **SAINT** (Bruker, V8.34A, 2013) and **SADABS-2014/2** (Bruker, 2014) was used for absorption correction.  $wR_2(\text{int})$  was 0.0693 before and 0.0471 after correction. The Ratio of minimum to maximum transmission is 0.8416. The  $\lambda/2$  correction factor is 0.00150. software which corrects for Lorentz polarisation. The final completeness is 98.5% out to 38.564 in  $\theta$ . The absorption coefficient ( $\mu$ ) of this material is 1.556 and the minimum and maximum transmissions are 0.6292 and 0.7476.

The structure was solved in the space group P1 with the **Superflip** (L. Palatinus & G. Chapuis, 2007) structure solution program using charge flipping methods. The space group R-3 (# 148) was determined by **Superflip** (L. Palatinus & G. Chapuis, 2007) structure solution program. The crystal structure was refined by Least Squares using version 2013-4 of **CoBaCoBusL** (Sheldrick, 2008). All non-hydrogen atoms were refined anisotropically. Hydrogen atom positions were calculated geometrically and refined using the riding model.

The value of  $Z'$  is 1/6.

## Data Plots: Diffraction Data

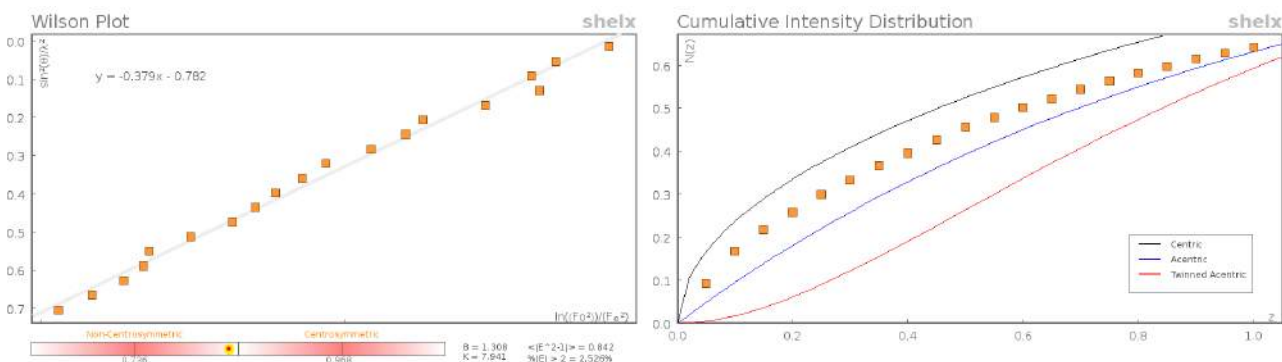

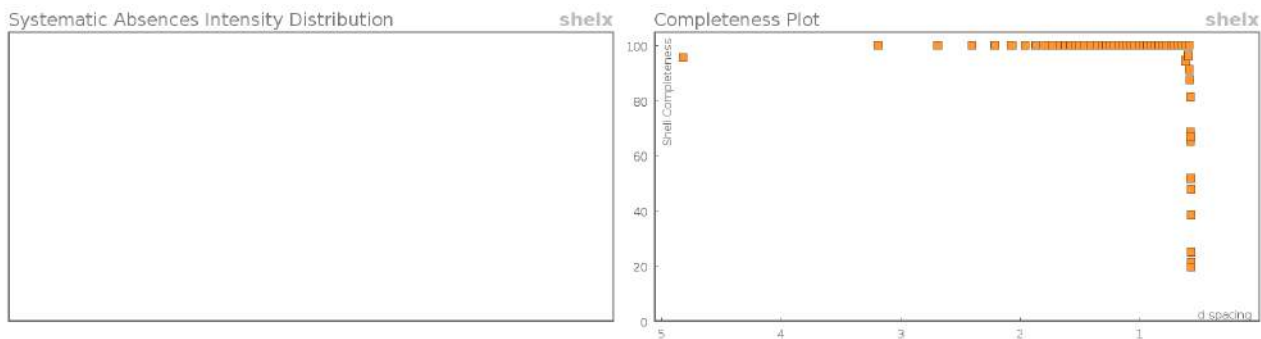

### Data Plots: Refinement and Data

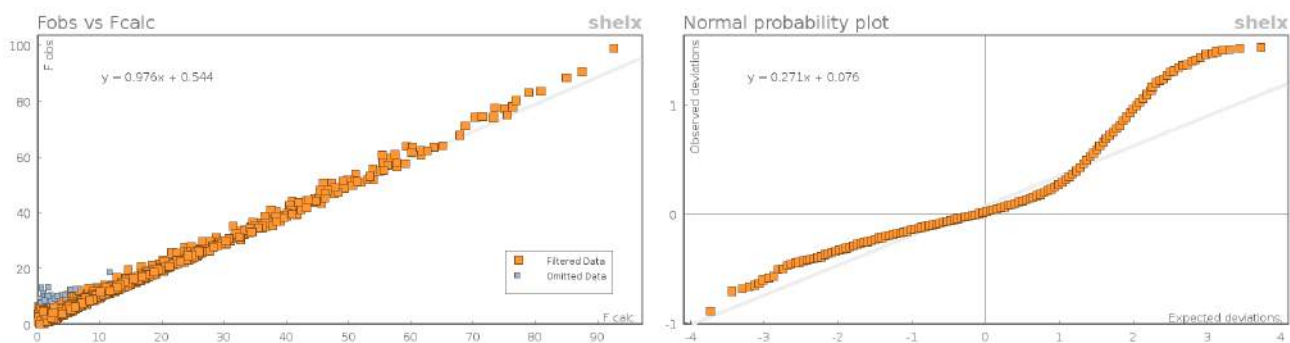

### Reflection Statistics

|                                                 |                               |                                                 |                 |
|-------------------------------------------------|-------------------------------|-------------------------------------------------|-----------------|
| Total reflections (after filtering)             | 36588                         | Unique reflections                              | 5154            |
| Completeness                                    | 0.97                          | Mean $I/\sigma$                                 | 43.9            |
| hkl <sub>sub&gt;max&lt;/sub&gt; collected</sub> | (21, 19, 51)                  | hkl <sub>sub&gt;min&lt;/sub&gt; collected</sub> | (-20, -21, -52) |
| hkl <sub>max</sub> used                         | (11, 22, 52)                  | hkl <sub>min</sub> used                         | (-21, 0, 0)     |
| Lim d <sub>max</sub> collected                  | 100.0                         | Lim d <sub>min</sub> collected                  | 0.36            |
| d <sub>max</sub> used                           | 10.13                         | d <sub>min</sub> used                           | 0.57            |
| Friedel pairs                                   | 8101                          | Friedel pairs merged                            | 1               |
| Inconsistent equivalents                        | 0                             | R <sub>int</sub>                                | 0.0276          |
| R <sub>sigma</sub>                              | 0.0187                        | Intensity transformed                           | 0               |
| Omitted reflections                             | 0                             | Omitted by user (OMIT hkl)                      | 337             |
| Multiplicity                                    | (10906, 5268, 4107, 540, 133) | Maximum multiplicity                            | 22              |
| Removed systematic absences                     | 0                             | Filtered off (Shel/OMIT)                        | 0               |

### Images of the Crystal on the Diffractometer

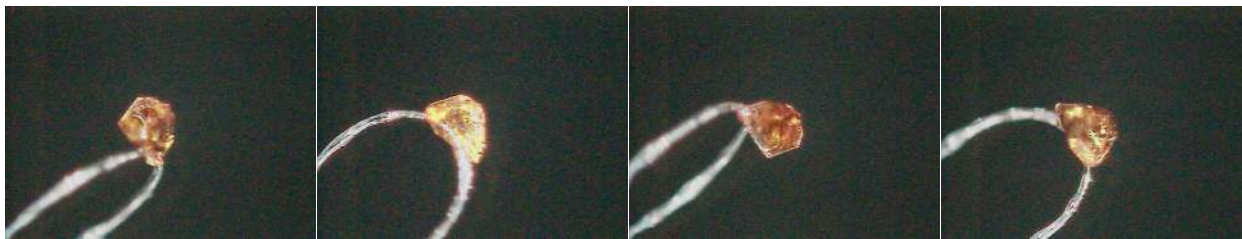

**Table S43:** Fractional Atomic Coordinates ( $\times 10^4$ ) and Equivalent Isotropic Displacement Parameters ( $\text{\AA}^2 \times 10^3$ ) for **CoBaCoBus**.  $U_{eq}$  is defined as 1/3 of the trace of the orthogonalised  $U_{ij}$ .

| Atom | x         | y         | z          | $U_{eq}$  |
|------|-----------|-----------|------------|-----------|
| Ba1  | 10000     | 10000     | 5000       | 18.19(9)  |
| Co1  | 10000     | 10000     | 6233.7(2)  | 15.98(12) |
| S1   | 7513.0(6) | 7895.8(6) | 5891.0(2)  | 18.66(13) |
| O2   | 6905(2)   | 6604(2)   | 5983.4(10) | 29.8(5)   |
| O1   | 8309(2)   | 8310(2)   | 5502.9(8)  | 22.1(4)   |
| C6   | 5594(4)   | 7452(5)   | 5380.3(19) | 46.1(11)  |
| C4   | 6900(4)   | 9602(4)   | 5659(2)    | 49.7(14)  |
| C5   | 5499(4)   | 7933(4)   | 6172(2)    | 51.0(14)  |
| N1   | 10000     | 10000     | 6920.4(15) | 19.0(7)   |
| N2   | 8311(3)   | 8710(3)   | 6284.5(10) | 30.7(6)   |
| C3   | 6315(3)   | 8246(3)   | 5766.7(15) | 30.2(7)   |
| C1   | 10900(8)  | 9638(8)   | 7071(3)    | 24.2(14)  |
| C2B  | 11458(6)  | 9288(6)   | 6729(2)    | 22(1)     |
| C1B  | 11174(8)  | 10085(8)  | 7032(3)    | 22.1(12)  |
| C2   | 11951(6)  | 10094(7)  | 6744(2)    | 26.2(12)  |

**Table S44:** Anisotropic Displacement Parameters ( $\times 10^4$ ) **CoBaCoBus**. The anisotropic displacement factor exponent takes the form:  $-2\pi^2[h^2a^{*2} \times U_{11} + \dots + 2hka^* \times b^* \times U_{12}]$

| Atom | $U_{11}$  | $U_{22}$  | $U_{33}$  | $U_{23}$ | $U_{13}$  | $U_{12}$ |
|------|-----------|-----------|-----------|----------|-----------|----------|
| Ba1  | 18.25(11) | 18.25(11) | 18.07(16) | 0        | 0         | 9.12(6)  |
| Co1  | 13.00(15) | 13.00(15) | 21.9(3)   | 0        | 0         | 6.50(8)  |
| S1   | 14.6(3)   | 15.2(3)   | 22.2(3)   | 0.2(2)   | 0.8(2)    | 4.5(2)   |
| O2   | 25.6(11)  | 16.2(9)   | 40.0(14)  | 6.4(9)   | -3.9(10)  | 4.7(8)   |
| O1   | 19.5(9)   | 25.2(10)  | 22.3(9)   | 2.3(8)   | 3.1(7)    | 11.7(8)  |
| C6   | 26.8(17)  | 52(3)     | 59(3)     | 0(2)     | -13.3(18) | 18.9(18) |
| C4   | 26.8(17)  | 28.0(17)  | 101(4)    | 15(2)    | 14(2)     | 18.8(15) |
| C5   | 25.2(17)  | 33(2)     | 86(4)     | -3(2)    | 27(2)     | 8.6(15)  |
| N1   | 17.2(10)  | 17.2(10)  | 22.6(18)  | 0        | 0         | 8.6(5)   |
| N2   | 17.3(11)  | 31.7(14)  | 23.3(12)  | -3.6(10) | 3.6(9)    | -2.7(10) |
| C3   | 15.5(11)  | 22.4(13)  | 52(2)     | 2.4(13)  | 4.8(12)   | 9(1)     |
| C1   | 25(4)     | 29(4)     | 23(3)     | -5(3)    | -5(3)     | 16(3)    |
| C2B  | 23(2)     | 26(3)     | 23(2)     | 2(2)     | -1.2(19)  | 16(2)    |
| C1B  | 20(3)     | 25(3)     | 23(3)     | -3(3)    | -4(2)     | 13(3)    |
| C2   | 21(2)     | 34(3)     | 28(3)     | -6(2)    | -5(2)     | 17(2)    |

**Table S45:** Bond Lengths in Å for **CoBaCoBus**.

| Atom | Atom             | Length/Å  |
|------|------------------|-----------|
| Ba1  | Co1              | 3.7490(7) |
| Ba1  | Co1 <sup>1</sup> | 3.7489(7) |
| Ba1  | O1               | 2.629(2)  |
| Ba1  | O1 <sup>1</sup>  | 2.629(2)  |
| Ba1  | O1 <sup>2</sup>  | 2.629(2)  |
| Ba1  | O1 <sup>3</sup>  | 2.629(2)  |
| Ba1  | O1 <sup>4</sup>  | 2.629(2)  |
| Ba1  | O1 <sup>5</sup>  | 2.629(2)  |
| Co1  | N1               | 2.087(5)  |
| Co1  | N2 <sup>5</sup>  | 1.942(3)  |
| Co1  | N2 <sup>3</sup>  | 1.942(3)  |
| Co1  | N2               | 1.942(3)  |
| S1   | O2               | 1.444(2)  |
| S1   | O1               | 1.467(2)  |
| S1   | N2               | 1.572(3)  |
| S1   | C3               | 1.820(4)  |
| C6   | C3               | 1.518(7)  |

| Atom | Atom             | Length/Å  |
|------|------------------|-----------|
| C4   | C3               | 1.527(5)  |
| C5   | C3               | 1.526(6)  |
| N1   | C1 <sup>5</sup>  | 1.497(9)  |
| N1   | C1               | 1.497(9)  |
| N1   | C1 <sup>3</sup>  | 1.497(9)  |
| N1   | C1B <sup>5</sup> | 1.474(8)  |
| N1   | C1B <sup>3</sup> | 1.474(8)  |
| N1   | C1B              | 1.474(8)  |
| N2   | C2B <sup>3</sup> | 1.453(7)  |
| N2   | C2 <sup>3</sup>  | 1.587(7)  |
| C1   | C2               | 1.524(12) |
| C2B  | N2 <sup>5</sup>  | 1.453(7)  |
| C2B  | C1B              | 1.535(11) |
| C2   | N2 <sup>5</sup>  | 1.587(7)  |

-----•  
<sup>1</sup>2-X,2-Y,1-Z; <sup>2</sup>1-Y+X,+X,1-Z; <sup>3</sup>1+Y-X,2-X,+Z; <sup>4</sup>+Y,1-X+Y,1-Z;  
<sup>5</sup>2-Y,1+X-Y,+Z

**Table S46:** Bond Angles in ° for CoBaCoBus.

| Atom             | Atom | Atom             | Angle/°    | Atom             | Atom | Atom             | Angle/°                                                                                                    |
|------------------|------|------------------|------------|------------------|------|------------------|------------------------------------------------------------------------------------------------------------|
| Co1 <sup>1</sup> | Ba1  | Co1              | 180.0      | O2               | S1   | O1               | 116.25(16)                                                                                                 |
| O1 <sup>2</sup>  | Ba1  | Co1 <sup>1</sup> | 125.54(5)  | O2               | S1   | N2               | 113.48(18)                                                                                                 |
| O1 <sup>3</sup>  | Ba1  | Co1 <sup>1</sup> | 125.54(5)  | O2               | S1   | C3               | 106.20(16)                                                                                                 |
| O1               | Ba1  | Co1 <sup>1</sup> | 125.54(5)  | O1               | S1   | N2               | 106.01(15)                                                                                                 |
| O1 <sup>1</sup>  | Ba1  | Co1 <sup>1</sup> | 54.46(5)   | O1               | S1   | C3               | 104.70(17)                                                                                                 |
| O1 <sup>4</sup>  | Ba1  | Co1              | 125.54(5)  | N2               | S1   | C3               | 109.8(2)                                                                                                   |
| O1 <sup>3</sup>  | Ba1  | Co1              | 54.46(5)   | S1               | O1   | Ba1              | 153.12(15)                                                                                                 |
| O1 <sup>5</sup>  | Ba1  | Co1              | 125.54(5)  | C1               | N1   | Co1              | 107.8(4)                                                                                                   |
| O1 <sup>2</sup>  | Ba1  | Co1              | 54.46(5)   | C1 <sup>2</sup>  | N1   | Co1              | 107.8(4)                                                                                                   |
| O1 <sup>5</sup>  | Ba1  | Co1 <sup>1</sup> | 54.46(5)   | C1 <sup>3</sup>  | N1   | Co1              | 107.8(4)                                                                                                   |
| O1               | Ba1  | Co1              | 54.46(5)   | C1               | N1   | C1 <sup>3</sup>  | 111.1(4)                                                                                                   |
| O1 <sup>1</sup>  | Ba1  | Co1              | 125.54(5)  | C1               | N1   | C1 <sup>2</sup>  | 111.1(4)                                                                                                   |
| O1 <sup>4</sup>  | Ba1  | Co1 <sup>1</sup> | 54.46(5)   | C1 <sup>2</sup>  | N1   | C1 <sup>3</sup>  | 111.1(4)                                                                                                   |
| O1 <sup>4</sup>  | Ba1  | O1 <sup>2</sup>  | 180.00(8)  | C1B              | N1   | Co1              | 103.3(4)                                                                                                   |
| O1 <sup>3</sup>  | Ba1  | O1 <sup>2</sup>  | 89.61(8)   | C1B <sup>2</sup> | N1   | Co1              | 103.3(4)                                                                                                   |
| O1               | Ba1  | O1 <sup>5</sup>  | 90.39(8)   | C1B <sup>3</sup> | N1   | Co1              | 103.3(4)                                                                                                   |
| O1 <sup>5</sup>  | Ba1  | O1 <sup>2</sup>  | 90.39(8)   | C1B <sup>2</sup> | N1   | C1B <sup>3</sup> | 114.9(3)                                                                                                   |
| O1               | Ba1  | O1 <sup>1</sup>  | 180.00(10) | C1B              | N1   | C1B <sup>3</sup> | 114.9(3)                                                                                                   |
| O1 <sup>5</sup>  | Ba1  | O1 <sup>1</sup>  | 89.61(8)   | C1B              | N1   | C1B <sup>2</sup> | 114.9(3)                                                                                                   |
| O1 <sup>5</sup>  | Ba1  | O1 <sup>3</sup>  | 180.0      | S1               | N2   | Co1              | 124.55(17)                                                                                                 |
| O1 <sup>2</sup>  | Ba1  | O1 <sup>1</sup>  | 90.39(8)   | S1               | N2   | C2 <sup>2</sup>  | 116.8(3)                                                                                                   |
| O1               | Ba1  | O1 <sup>4</sup>  | 90.39(8)   | C2B <sup>2</sup> | N2   | Co1              | 113.6(3)                                                                                                   |
| O1 <sup>3</sup>  | Ba1  | O1 <sup>1</sup>  | 90.39(8)   | C2B <sup>2</sup> | N2   | S1               | 121.8(3)                                                                                                   |
| O1 <sup>5</sup>  | Ba1  | O1 <sup>4</sup>  | 89.61(8)   | C2 <sup>2</sup>  | N2   | Co1              | 108.3(3)                                                                                                   |
| O1               | Ba1  | O1 <sup>3</sup>  | 89.61(8)   | C6               | C3   | S1               | 107.3(3)                                                                                                   |
| O1               | Ba1  | O1 <sup>2</sup>  | 89.61(8)   | C6               | C3   | C4               | 111.8(4)                                                                                                   |
| O1 <sup>4</sup>  | Ba1  | O1 <sup>1</sup>  | 89.61(8)   | C6               | C3   | C5               | 110.4(4)                                                                                                   |
| O1 <sup>3</sup>  | Ba1  | O1 <sup>4</sup>  | 90.39(8)   | C4               | C3   | S1               | 108.9(2)                                                                                                   |
| N1               | Co1  | Ba1              | 180.0      | C5               | C3   | S1               | 107.9(3)                                                                                                   |
| N2 <sup>2</sup>  | Co1  | Ba1              | 94.56(9)   | C5               | C3   | C4               | 110.5(4)                                                                                                   |
| N2               | Co1  | Ba1              | 94.56(9)   | N1               | C1   | C2               | 109.8(6)                                                                                                   |
| N2 <sup>3</sup>  | Co1  | Ba1              | 94.56(9)   | N2 <sup>3</sup>  | C2B  | C1B              | 105.3(5)                                                                                                   |
| N2 <sup>3</sup>  | Co1  | N1               | 85.44(9)   | N1               | C1B  | C2B              | 111.9(6)                                                                                                   |
| N2               | Co1  | N1               | 85.44(9)   | C1               | C2   | N2 <sup>3</sup>  | 103.7(5)                                                                                                   |
| N2 <sup>2</sup>  | Co1  | N1               | 85.44(9)   | -----•           |      |                  |                                                                                                            |
| N2 <sup>3</sup>  | Co1  | N2               | 119.38(3)  |                  |      |                  | <sup>1</sup> 2-X,2-Y,1-Z; <sup>2</sup> 1+Y-X,2-X,+Z; <sup>3</sup> 2-Y,1+X-Y,+Z; <sup>4</sup> 1-Y+X,+X,1-Z; |
| N2 <sup>2</sup>  | Co1  | N2               | 119.38(3)  |                  |      |                  | <sup>5</sup> +Y,1-X+Y,1-Z                                                                                  |
| N2 <sup>2</sup>  | Co1  | N2 <sup>3</sup>  | 119.38(3)  |                  |      |                  |                                                                                                            |

**Table S47:** Hydrogen Fractional Atomic Coordinates ( $\times 10^4$ ) and Equivalent Isotropic Displacement Parameters ( $\text{\AA}^2 \times 10^3$ ) for CoBaCoBus.  $U_{eq}$  is defined as 1/3 of the trace of the orthogonalised  $U_{ij}$ .

| Atom | x    | y     | z    | $U_{eq}$ |
|------|------|-------|------|----------|
| H6A  | 6121 | 7681  | 5120 | 69       |
| H6B  | 4899 | 7567  | 5320 | 69       |
| H6C  | 5298 | 6593  | 5452 | 69       |
| H4A  | 7404 | 10084 | 5908 | 75       |
| H4B  | 6260 | 9807  | 5604 | 75       |
| H4C  | 7411 | 9786  | 5396 | 75       |
| H5A  | 5192 | 7079  | 6253 | 76       |
| H5B  | 4811 | 8056  | 6106 | 76       |
| H5C  | 5972 | 8462  | 6417 | 76       |

| Atom | x     | y     | z    | $U_{eq}$ |
|------|-------|-------|------|----------|
| H1A  | 10494 | 8738  | 7095 | 29       |
| H1B  | 11218 | 9991  | 7365 | 29       |
| H2BA | 12306 | 9467  | 6773 | 26       |
| H2BB | 10895 | 8412  | 6789 | 26       |
| H1BA | 11148 | 9826  | 7341 | 27       |
| H1BB | 11835 | 10945 | 7007 | 27       |
| H2A  | 12491 | 9759  | 6813 | 31       |
| H2B  | 12439 | 10996 | 6745 | 31       |

## References

1. Motekaitis, R. J.; Martell, A. E.; Murase, I., Cascade halide binding by multiprotonated 7,19,30-trioxa-1,4,10,13,16,22,27,33-octaazabicyclo[11.11.11]pentatriacontane (BISTREN) and copper(II) BISTREN cryptates. *Inorganic Chemistry* **1986**, *25* (7), 938-944.
2. Sanchez, E. R.; Gessel, M. C.; Groy, T. L.; Caudle, M. T., Interaction of Biotin with Mg–O Bonds: Bifunctional Binding and Recognition of Biotin and Related Ligands by the Mg(15-crown-5) $_2^+$  Unit. *Journal of the American Chemical Society* **2002**, *124* (9), 1933-1940.
3. Netscher, T.; Prinzbach, H., Sterically Crowded Sulfonate Esters: Novel Leaving Groups with Hindered S-O Cleavage. *Synthesis* **1987**, *1987* (08), 683-688.
4. Gontcharov, A. V.; Liu, H.; Sharpless, K. B., tert-Butylsulfonamide. A New Nitrogen Source for Catalytic Aminohydroxylation and Aziridination of Olefins. *Organic Letters* **1999**, *1* (5), 783-786.
5. Benetollo, F.; Bombieri, G.; Samaria, K. M.; Vallarino, L. M.; Williams, J. W., Isomerism in calcium and strontium complexes of six-nitrogen-donor macrocyclic ligands with peripheral methyl substituents, and crystal structure of [Sr(CF<sub>3</sub>SO<sub>3</sub>)<sub>2</sub>(C<sub>24</sub>H<sub>30</sub>N<sub>6</sub>)]. *Polyhedron* **2001**, *20* (26–27), 3143-3148.
6. (a) Bruker-AXS APEX2. Version 2014.11-0, Madison, WI, 2014; (b) Dolomanov, O. V.; Bourhis, L. J.; Gildea, R. J.; Howard, J. A. K.; Puschmann, H., OLEX2: a complete structure solution, refinement and analysis program. *Journal of Applied Crystallography* **2009**, *42* (2), 339-341; (c) Bruker-AXS SAINT-8.34A-2013 - Software for the Integration of CCD Detector System Bruker Analytical X-ray Systems, Madison, WI, 2013; (d) Sheldrick, G., A short history of SHELX. *Acta Crystallographica Section A* **2008**, *64* (1), 112-122; (e) Sheldrick, G., SHELXT - Integrated space-group and crystal-structure determination. *Acta Crystallographica Section A* **2015**, *71* (1), 3-8; (f) Palatinus, L.; Chapuis, G., SUPERFLIP - a computer program for the solution of crystal structures by charge flipping in arbitrary dimensions. *Journal of Applied Crystallography* **2007**, *40* (4), 786-790.
